# Supplementary material for: High Resolution Copy Number Variation Data in the NCI-60 Cancer Cell Lines from Whole Genome Microarrays Accessible through CellMiner
Source: PLoS One. 2014 Mar 26;9(3):e92047. doi: 10.1371/journal.pone.0092047 (PMC3966786; doi:10.1371/journal.pone.0092047)
Supplement: Table S3 — Correlation between gene expression and copy number for all genes along with the number of cell lines with focal gains or losses. (XLSX) [file pone.0092047.s004.xlsx]

## Sheet: Supplementary Table 3
	Supplementary Table 3: Gene expression/copy number correlation and focal gains/losses for all genes
	Footnotes
	aThe three criteria for a putative new tumor suppressor are i) statistically significant correlation between copy number and expression (False Detection Ratio FDR < 0.05),
	ii) the gene is focally gained or lost in at least 3 samples, iii) the number of samples with focal losses is greater than 3 times the number of focal gains
	bThe table includes results for 18,504 genes for which we have both gene expression z-scores and copy number estimates.
	Gene	Entrez ID	Name	Chromosome	Gene Start	Gene End	Cytoband	Pearson correlation	Pearson p-value	Pearson FDR	Closest oncogene/tumor suppressor	Distance to closest oncogene/tumor suppressor (in bases)	Number of cell lines with focal gains	Number of cell lines with focal losses	Focally gained cell line, chromosome and region	Focally lost cell line, chromosome and region	Satisfies the three criteria	Satisfies the three criteria and >2Mb from nearest oncogene/tumor suppressor
	CDKN2A	1029	cyclin-dependent kinase inhibitor 2A (melanoma, p16, inhibits CDK4)	9	21967750	21994490	9p21.3	0.823051	7.08437e-16	1.30572e-11	CDKN2A	0	0	24		BR:MCF7 9:21841175-22039386,CNS:SF_268 9:21800624-22214031,CNS:SF_295 9:21943861-22012113,CNS:SNB_19 9:21937141-22149027,CNS:U251 9:21934694-22148864,LE:CCRF_CEM 9:21817420-21989207,LE:MOLT_4 9:21931036-21991152,LE:SR 9:21871668-21985190,ME:LOXIMVI 9:21864077-21990783,ME:MALME_3M 9:21282489-22892510,ME:SK_MEL_2 9:21905342-22393135,ME:UACC_62 9:21957976-22053824,LC:A549 9:21839815-22091403,LC:HOP_…	TRUE	FALSE
	CDKN2B-AS1	100048912	CDKN2B antisense RNA 1 (non-protein coding)	9	21994789	22121093	9p21.3	0.652498	2.14975e-08	0.000363459	CDKN2A	299	0	17		BR:MCF7 9:21841175-22039386,CNS:SF_268 9:21800624-22214031,CNS:SF_295 9:21943861-22012113,CNS:SNB_19 9:21937141-22149027,CNS:U251 9:21934694-22148864,ME:MALME_3M 9:21282489-22892510,ME:SK_MEL_2 9:21905342-22393135,ME:UACC_62 9:21957976-22053824,LC:A549 9:21839815-22091403,LC:NCI_H322M 9:20272274-22148864,LC:NCI_H460 9:21972668-22096927,OV:OVCAR_5 9:21726729-22193977,OV:SK_OV_3 9:21972668-22098636…	TRUE	FALSE
	CDKN2B	1030	cyclin-dependent kinase inhibitor 2B (p15, inhibits CDK4)	9	22002901	22009312	9p21.3	0.429121	0.000623495	1	CDKN2A	8411	1	17	RE:ACHN 9:22000187-24498048	BR:MCF7 9:21841175-22039386,CNS:SF_268 9:21800624-22214031,CNS:SF_295 9:21943861-22012113,CNS:SNB_19 9:21937141-22149027,CNS:U251 9:21934694-22148864,ME:MALME_3M 9:21282489-22892510,ME:SK_MEL_2 9:21905342-22393135,ME:UACC_62 9:21957976-22053824,LC:A549 9:21839815-22091403,LC:NCI_H322M 9:20272274-22148864,LC:NCI_H460 9:21972668-22096927,OV:OVCAR_5 9:21726729-22193977,OV:SK_OV_3 9:21972668-22098636…	FALSE	FALSE
	FHIT	2272	fragile histidine triad gene	3	59735035	61237133	3p14.2	0.287896	0.0257088	1	PBRM1	7015169	0	12		CO:COLO205 3:60445428-60559086,CO:HCT_15 3:60376305-61018534,CO:KM12 3:60287741-60603507,CO:SW_620 3:60460663-60539236,LE:K_562 3:59749405-60079922,ME:M14 3:61167884-62185384,LC:EKVX 3:60621703-60923557,LC:HOP_92 3:60236966-60706326,LC:NCI_H322M 3:60387021-60620314,LC:NCI_H460 3:60428941-60501155,LC:NCI_H522 3:60241143-60405193,OV:OVCAR_5 3:59765122-59892107	FALSE	FALSE
	WWOX	51741	WW domain containing oxidoreductase	16	78133326	79246564	16q23.1:16q23.2	0.326468	0.0109031	1	ADAMTS18	664315	0	11		BR:MDA_MB_231 16:78395191-78555694,CNS:U251 16:79112108-79213736,CO:HCC_2998 16:78933917-79216017,CO:HCT_116 16:78665070-78759346,CO:HCT_15 16:78947386-79181522,CO:KM12 16:78585273-78812810,CO:SW_620 16:78548923-78603785,LC:HOP_92 16:78540640-78571270,OV:OVCAR_8 16:79018362-79056091,OV:NCI_ADR_RES 16:79018036-79057029,RE:SN12C 16:78783833-78886320	FALSE	FALSE
	MACROD2	140733	MACRO domain containing 2	20	13976145	16033841	20p12.1	0.0549379	0.679409	1	ASXL1	14912305	0	10		BR:T47D 20:14387625-14891981,CNS:SF_539 20:15027738-15219525,CO:HCT_15 20:14693228-14799066,CO:KM12 20:14548870-15084214,CO:SW_620 20:14740786-15222913,OV:IGROV1 20:15008614-15189117,PR:DU_145 20:14712172-15202370,RE:CAKI_1 20:14748600-15053021,RE:SN12C 20:14744630-15324798,PR:DU_145(DTP) 20:14730537-15196581	FALSE	FALSE
	MTAP	4507	methylthioadenosine phosphorylase	9	21802634	21865969	9p21.3	0.835344	1.05188e-16	1.94167e-12	CDKN2A	101781	1	9	ME:SK_MEL_2 9:21073413-21874110	BR:MCF7 9:21841175-22039386,CNS:SF_268 9:21800624-22214031,LE:CCRF_CEM 9:21817420-21989207,ME:LOXIMVI 9:21864077-21990783,ME:MALME_3M 9:21282489-22892510,LC:A549 9:21839815-22091403,LC:NCI_H322M 9:20272274-22148864,OV:OVCAR_5 9:21726729-22193977,RE:ACHN 9:20164965-21990783	TRUE	FALSE
	OR4C11	219429	olfactory receptor, family 4, subfamily C, member 11	11	55370829	55371874	11q11	-2.02642e-05	0.999881	1	MEN1	9199111	0	7		CNS:SF_295 11:55368396-55431290,CNS:SNB_19 11:55368396-55431290,CNS:U251 11:55368396-55431290,CO:SW_620 11:55368396-55445674,ME:MDA_MB_435 11:55368396-55442194,ME:MDA_N 11:55367528-55451854,RE:ACHN 11:55368746-55431290	FALSE	FALSE
	RBFOX1	54715	RNA binding protein, fox-1 homolog (C. elegans) 1	16	6069131	7763340	16p13.3	-0.0783036	0.555527	1	CREBBP	2139010	0	7		CO:COLO205 16:6444462-6628296,CO:HCT_116 16:6222071-6940444,CO:SW_620 16:6868159-7265279,ME:SK_MEL_28 16:6273483-6951085,LC:NCI_H226 16:7206439-7556408,RE:RXF_393 16:6205229-7238537,RE:TK_10 16:6924003-7069814	FALSE	FALSE
	LRP1B	53353	low density lipoprotein receptor-related protein 1B	2	140988995	142889270	2q22.1:2q22.2	-0.201741	0.122165	1	ACVR2A	5713299	0	6		CNS:SF_268 2:141633874-141962322,CNS:SNB_19 2:141722738-142339534,ME:UACC_62 2:141843054-142116706,LC:NCI_H460 2:141732479-142008077,OV:OVCAR_3 2:141853446-142123233,RE:CAKI_1 2:142169814-142238826	FALSE	FALSE
	ANKS1B	56899	ankyrin repeat and sterile alpha motif domain containing 1B	12	99128568	100378432	12q23.1	0.293376	0.0241255	1	HNF1A	21038116	0	6		BR:MCF7 12:99497646-99626857,BR:T47D 12:99633041-99964092,LC:NCI_H522 12:99395204-99879163,OV:SK_OV_3 12:99032116-99485382,RE:RXF_393 12:99808741-99989046,PR:RC01 12:100274127-100565709	FALSE	FALSE
	FAF1	11124	Fas (TNFRSF6) associated factor 1	1	50906934	51425936	1p32.3	0.729352	3.86924e-11	6.93639e-07	CDKN2C	8430	0	4		CNS:SNB_19 1:51032096-51440292,CNS:U251 1:50989050-51445752,LE:RPMI_8226 1:51155634-51468942,PR:PC_3 1:50590444-51078379	TRUE	FALSE
	CFHR1	3078	complement factor H-related 1	1	196788860	196801319	1q31.3	0.355392	0.00574111	1	CDC73	3564918	0	4		LE:RPMI_8226 1:196702498-196798048,LC:HOP_62 1:196780523-196930669,OV:OVCAR_8 1:196727780-196874705,RE:ACHN 1:196754076-196793752	FALSE	FALSE
	PDE4D	5144	phosphodiesterase 4D, cAMP-specific	5	58264865	59783925	5q11.2:5q12.1	0.0465232	0.724105	1	MAST4	6108250	0	4		ME:SK_MEL_28 5:59128702-59425196,ME:SK_MEL_5 5:58336174-58366448,LC:NCI_H460 5:59161793-59208730,OV:IGROV1 5:59172039-59513560	FALSE	FALSE
	MAGI2	9863	membrane associated guanylate kinase, WW and PDZ domain containing 2	7	77646373	79082890	7q21.11	0.0810089	0.541907	1	EZH2	69421573	0	4		ME:SK_MEL_28 7:78333038-78456176,OV:OVCAR_8 7:78039353-78379244,OV:NCI_ADR_RES 7:78037480-78388180,RE:SN12C 7:78518813-79089078	FALSE	FALSE
	PVT1	5820	Pvt1 oncogene (non-protein coding)	8	128902873	129113499	8q24.21	0.509431	3.22457e-05	0.46337	NKX3-1	105362423	0	4		CNS:U251 8:128870550-129099938,CO:SW_620 8:128779773-129012988,LE:HL_60 8:128779773-129996497,PR:PC_3 8:128875722-129562358	FALSE	FALSE
	PTPRD	5789	protein tyrosine phosphatase, receptor type, D	9	8314245	10612723	9p24.1:9p23	0.0437889	0.739729	1	CDKN2A	11355027	0	4		BR:MCF7 9:8409519-8692695,ME:SK_MEL_5 9:9163566-9673887,OV:OVCAR_3 9:9267391-9719918,PR:PC_3 9:9080451-9443152	FALSE	FALSE
	PTEN	5728	phosphatase and tensin homolog	10	89623194	89728532	10q23.31	0.774652	3.81584e-13	6.97002e-09	PTEN	0	1	4	OV:OVCAR_4 10:88083026-89996584	CNS:SF_539 10:89260683-91160748,LE:CCRF_CEM 10:89607816-89696858,PR:PC_3 10:89676640-90493492,RE:RXF_393 10:89540437-89658332	TRUE	FALSE
	RNF121	55298	ring finger protein 121	11	71639767	71708643	11q13.4	0.62843	7.62251e-08	0.00126396	MEN1	7061001	1	3	ME:SK_MEL_5 11:68544562-72066913	ME:SK_MEL_2 11:70803936-74754489,LC:EKVX 11:70339364-72091902,LC:HOP_62 11:71254228-73014538	TRUE	TRUE
	ADORA2B	136	adenosine A2b receptor	17	15848230	15879210	17p12	0.500335	4.68506e-05	0.665372	MAP2K4	3801179	0	4		LE:RPMI_8226 17:15712672-17570053,PR:DU_145 17:15751600-18022589,RE:CAKI_1 17:13850504-16081289,PR:RC01 17:15799276-17999828	FALSE	FALSE
	IL18BP	10068	interleukin 18 binding protein	11	71709957	71713965	11q13.4	0.604717	3.10385e-07	0.00502016	MEN1	7131191	1	3	ME:SK_MEL_5 11:68544562-72066913	ME:SK_MEL_2 11:70803936-74754489,LC:EKVX 11:70339364-72091902,LC:HOP_62 11:71254228-73014538	TRUE	TRUE
	ZSWIM7	125150	zinc finger, SWIM-type containing 7	17	15879874	15903006	17p12	0.554357	5.22818e-06	0.0794318	MAP2K4	3832823	0	4		LE:RPMI_8226 17:15712672-17570053,PR:DU_145 17:15751600-18022589,RE:CAKI_1 17:13850504-16081289,PR:RC01 17:15799276-17999828	FALSE	FALSE
	DGCR8	54487	DiGeorge syndrome critical region gene 8	22	20067754	20099400	22q11.21	0.758312	2.26717e-12	4.11695e-08	SMARCB1	4029749	3	4	CO:HT29 22:19584787-21275284,ME:MALME_3M 22:18912528-21456518,PR:RC01 22:20055495-21964328	ME:SK_MEL_2 22:20064512-22647780,LC:EKVX 22:20013881-22212684,OV:OVCAR_5 22:20052954-20993032,PR:DU_145(DTP) 22:18956602-20089647	FALSE	FALSE
	NUMA1	4926	nuclear mitotic apparatus protein 1	11	71713910	71791573	11q13.4	0.73959	1.48114e-11	2.66694e-07	MEN1	7135144	1	3	ME:SK_MEL_5 11:68544562-72066913	ME:SK_MEL_2 11:70803936-74754489,LC:EKVX 11:70339364-72091902,LC:HOP_62 11:71254228-73014538	TRUE	TRUE
	CDKN2C	1031	cyclin-dependent kinase inhibitor 2C (p18, inhibits CDK4)	1	51434366	51440309	1p32.3	0.479042	0.000107903	1	CDKN2C	0	0	3		CNS:SNB_19 1:51032096-51440292,CNS:U251 1:50989050-51445752,LE:RPMI_8226 1:51155634-51468942	FALSE	FALSE
	CFHR3	10878	complement factor H-related 3	1	196743929	196763203	1q31.3	0.26588	0.0400443	1	CDC73	3519987	0	3		LE:RPMI_8226 1:196702498-196798048,OV:OVCAR_8 1:196727780-196874705,RE:ACHN 1:196754076-196793752	FALSE	FALSE
	MYC	4609	v-myc myelocytomatosis viral oncogene homolog (avian)	8	128748314	128753680	8q24.21	0.442768	0.000396302	1	NKX3-1	105207864	4	0	CO:SW_620 8:128631126-128772787,LE:HL_60 8:128693720-128772787,LE:RPMI_8226 8:128744372-128796461,PR:PC_3 8:128737823-128827661		FALSE	FALSE
	LRRTM1	347730	leucine rich repeat transmembrane neuronal 1	2	80529002	80531487	2p12	-0.0803087	0.541882	1	MSH6	32494910	0	3		PR:DU_145 2:80517854-80638528,PR:DU_145(DTP) 2:80517854-80641140,PR:RC01 2:80516872-80643861	FALSE	FALSE
	FBLN7	129804	fibulin 7	2	112895961	112945791	2q13	0.244679	0.0595438	1	ACVR2A	35656778	0	3		CNS:SNB_19 2:112895145-112949384,CNS:U251 2:112899191-112952644,OV:SK_OV_3 2:110973315-113097786	FALSE	FALSE
	FAM19A1	407738	family with sequence similarity 19 (chemokine (C-C motif)-like), member A1	3	68040733	68594771	3p14.1	-0.419065	0.000954826	1	ROBO1	10051616	0	3		ME:SK_MEL_28 3:68335965-68609140,OV:OVCAR_4 3:67992898-68909770,RE:RXF_393 3:68033728-68094765	FALSE	FALSE
	MAML3	55534	mastermind-like 3 (Drosophila)	4	140637545	141075233	4q31.1	-0.0590411	0.65408	1	FBXW7	12167176	0	3		PR:DU_145 4:140686409-141056125,PR:DU_145(DTP) 4:140693540-141033403,PR:RC01 4:140687613-141054397	FALSE	FALSE
	GMDS	2762	GDP-mannose 4,6-dehydratase	6	1624034	2245868	6p25.3	0.30407	0.0181767	1	E2F3	18156268	0	3		CO:HCT_116 6:1784268-2249604,LE:RPMI_8226 6:1819188-2071284,LC:EKVX 6:780703-1885520	FALSE	FALSE
	AUTS2	26053	autism susceptibility candidate 2	7	69063904	70257885	7q11.22	0.246066	0.0580689	1	EZH2	78246578	0	3		RE:CAKI_1 7:69596870-69733840,RE:RXF_393 7:69697962-70170989,RE:TK_10 7:69450839-69774210	FALSE	FALSE
	CSMD3	114788	CUB and Sushi multiple domains 3	8	113235158	114449242	8q23.3	0.178284	0.172922	1	NKX3-1	89694708	0	3		CNS:U251 8:112899117-114300792,OV:OVCAR_8 8:110505963-114827702,OV:NCI_ADR_RES 8:110505963-114830529	FALSE	FALSE
	LINGO2	158038	leucine rich repeat and Ig domain containing 2	9	27948083	29212998	9p21.2:9p21.1	0.3763	0.00304415	1	TEK	717911	0	3		LE:K_562 9:28580890-31619836,RE:CAKI_1 9:28208023-28335412,RE:SN12C 9:28503892-28664875	FALSE	FALSE
	KLHL9	55958	kelch-like 9 (Drosophila)	9	21331017	21335429	9p21.3	0.936053	5.43843e-28	1.00633e-23	CDKN2A	632321	1	3	ME:SK_MEL_2 9:21073413-21874110	ME:MALME_3M 9:21282489-22892510,LC:NCI_H322M 9:20272274-22148864,RE:ACHN 9:20164965-21990783	TRUE	FALSE
	IFNA5	3442	interferon, alpha 5	9	21304612	21305312	9p21.3	0.0199809	0.880601	1	CDKN2A	662438	1	3	ME:SK_MEL_2 9:21073413-21874110	ME:MALME_3M 9:21282489-22892510,LC:NCI_H322M 9:20272274-22148864,RE:ACHN 9:20164965-21990783	FALSE	FALSE
	IFNA13	3447	interferon, alpha 13	9	21367370	21368075	9p21.3	-0.177818	0.177855	1	CDKN2A	599675	1	3	ME:SK_MEL_2 9:21073413-21874110	ME:MALME_3M 9:21282489-22892510,LC:NCI_H322M 9:20272274-22148864,RE:ACHN 9:20164965-21990783	FALSE	FALSE
	IFNE	338376	interferon, epsilon	9	21480838	21482312	9p21.3	0.332432	0.0100984	1	CDKN2A	485438	1	3	ME:SK_MEL_2 9:21073413-21874110	ME:MALME_3M 9:21282489-22892510,LC:NCI_H322M 9:20272274-22148864,RE:ACHN 9:20164965-21990783	FALSE	FALSE
	LAMTOR1	55004	late endosomal/lysosomal adaptor, MAPK and MTOR activator 1	11	71808337	71814433	11q13.4	0.737615	1.78861e-11	3.21647e-07	MEN1	7229571	1	3	ME:SK_MEL_5 11:68544562-72066913	ME:SK_MEL_2 11:70803936-74754489,LC:EKVX 11:70339364-72091902,LC:HOP_62 11:71254228-73014538	TRUE	TRUE
	KLLN	100144748	killin, p53-regulated DNA replication inhibitor	10	89618917	89623194	10q23.31	0.623013	1.06141e-07	0.00174932	PTEN	0	1	3	OV:OVCAR_4 10:88083026-89996584	CNS:SF_539 10:89260683-91160748,LE:CCRF_CEM 10:89607816-89696858,RE:RXF_393 10:89540437-89658332	TRUE	FALSE
	DLG2	1740	discs, large homolog 2 (Drosophila)	11	83166055	85338314	11q14.1	0.0703951	0.593016	1	MEN1	18587289	0	3		CO:HCT_116 11:84055620-84140247,LC:EKVX 11:82258473-83807445,LC:NCI_H322M 11:83210431-83514507	FALSE	FALSE
	SHANK2	22941	SH3 and multiple ankyrin repeat domains 2	11	70313960	70935808	11q13.3:11q13.4	0.252035	0.0520557	1	MEN1	5735194	1	3	ME:SK_MEL_5 11:68544562-72066913	ME:SK_MEL_2 11:70803936-74754489,ME:SK_MEL_28 11:69663418-70864179,LC:EKVX 11:70339364-72091902	FALSE	FALSE
	CLPB	81570	ClpB caseinolytic peptidase B homolog (E. coli)	11	72003469	72145724	11q13.4	0.447374	0.000338634	1	MEN1	7424703	0	3		ME:SK_MEL_2 11:70803936-74754489,LC:EKVX 11:70339364-72091902,LC:HOP_62 11:71254228-73014538	FALSE	FALSE
	PIGL	9487	phosphatidylinositol glycan anchor biosynthesis, class L	17	16120508	16229573	17p11.2	0.649763	1.94054e-08	0.000328417	MAP2K4	4073457	0	3		LE:RPMI_8226 17:15712672-17570053,PR:DU_145 17:15751600-18022589,PR:RC01 17:15799276-17999828	TRUE	TRUE
	KRTAP5-11	440051	keratin associated protein 5-11	11	71292900	71293921	11q13.4	0.097942	0.460522	1	MEN1	6714134	1	3	ME:SK_MEL_5 11:68544562-72066913	ME:SK_MEL_2 11:70803936-74754489,LC:EKVX 11:70339364-72091902,LC:HOP_62 11:71254228-73014538	FALSE	FALSE
	KRTAP5-9	3846	keratin associated protein 5-9	11	71259465	71260653	11q13.4	0.0332651	0.802497	1	MEN1	6680699	1	3	ME:SK_MEL_5 11:68544562-72066913	ME:SK_MEL_2 11:70803936-74754489,LC:EKVX 11:70339364-72091902,LC:HOP_62 11:71254228-73014538	FALSE	FALSE
	DEFB108B	245911	defensin, beta 108B	11	71544245	71548608	11q13.4	-0.0595852	0.653945	1	MEN1	6965479	1	3	ME:SK_MEL_5 11:68544562-72066913	ME:SK_MEL_2 11:70803936-74754489,LC:EKVX 11:70339364-72091902,LC:HOP_62 11:71254228-73014538	FALSE	FALSE
	LOC100133315	100133315	transient receptor potential cation channel, subfamily C, member 2-like	11	71576554	71639493	11q13.4	0.511837	2.91589e-05	0.420267	MEN1	6997788	1	3	ME:SK_MEL_5 11:68544562-72066913	ME:SK_MEL_2 11:70803936-74754489,LC:EKVX 11:70339364-72091902,LC:HOP_62 11:71254228-73014538	FALSE	FALSE
	ZNF624	57547	zinc finger protein 624	17	16524047	16557167	17p11.2	0.720403	8.65001e-11	1.54264e-06	MAP2K4	4476996	0	3		LE:RPMI_8226 17:15712672-17570053,PR:DU_145 17:15751600-18022589,PR:RC01 17:15799276-17999828	TRUE	TRUE
	FLCN	201163	folliculin	17	17115526	17140502	17p11.2	0.708653	2.37624e-10	4.20405e-06	MAP2K4	5068475	0	3		LE:RPMI_8226 17:15712672-17570053,PR:DU_145 17:15751600-18022589,PR:RC01 17:15799276-17999828	TRUE	TRUE
	LRTOMT	220074	leucine rich transmembrane and 0-methyltransferase domain containing	11	71791376	71821828	11q13.4	0.542778	7.45252e-06	0.112131	MEN1	7212610	1	3	ME:SK_MEL_5 11:68544562-72066913	ME:SK_MEL_2 11:70803936-74754489,LC:EKVX 11:70339364-72091902,LC:HOP_62 11:71254228-73014538	FALSE	FALSE
	COPS3	8533	COP9 constitutive photomorphogenic homolog subunit 3 (Arabidopsis)	17	17149937	17184617	17p11.2	0.8062	7.7195e-15	1.41931e-10	MAP2K4	5102886	0	3		LE:RPMI_8226 17:15712672-17570053,PR:DU_145 17:15751600-18022589,PR:RC01 17:15799276-17999828	TRUE	TRUE
	FOLR1	2348	folate receptor 1 (adult)	11	71900601	71907367	11q13.4	0.142684	0.276791	1	MEN1	7321835	1	3	ME:SK_MEL_5 11:68544562-72066913	ME:SK_MEL_2 11:70803936-74754489,LC:EKVX 11:70339364-72091902,LC:HOP_62 11:71254228-73014538	FALSE	FALSE
	FOLR2	2350	folate receptor 2 (fetal)	11	71927818	71932994	11q13.4	0.0747814	0.570127	1	MEN1	7349052	1	3	ME:SK_MEL_5 11:68544562-72066913	ME:SK_MEL_2 11:70803936-74754489,LC:EKVX 11:70339364-72091902,LC:HOP_62 11:71254228-73014538	FALSE	FALSE
	FOLR3	2352	folate receptor 3 (gamma)	11	71846770	71850934	11q13.4	0.119625	0.366823	1	MEN1	7268004	1	3	ME:SK_MEL_5 11:68544562-72066913	ME:SK_MEL_2 11:70803936-74754489,LC:EKVX 11:70339364-72091902,LC:HOP_62 11:71254228-73014538	FALSE	FALSE
	INPPL1	3636	inositol polyphosphate phosphatase-like 1	11	71935881	71950188	11q13.4	0.53995	8.49002e-06	0.127138	MEN1	7357115	1	3	ME:SK_MEL_5 11:68544562-72066913	ME:SK_MEL_2 11:70803936-74754489,LC:EKVX 11:70339364-72091902,LC:HOP_62 11:71254228-73014538	FALSE	FALSE
	PHOX2A	401	paired-like homeobox 2a	11	71950120	71955220	11q13.4	-0.0395561	0.766122	1	MEN1	7371354	1	3	ME:SK_MEL_5 11:68544562-72066913	ME:SK_MEL_2 11:70803936-74754489,LC:EKVX 11:70339364-72091902,LC:HOP_62 11:71254228-73014538	FALSE	FALSE
	PHLDA1	22822	pleckstrin homology-like domain, family A, member 1	12	76419226	76425556	12q21.2	0.143379	0.274435	1	MDM2	7179906	0	3		CO:HCT_116 12:76148278-76717294,ME:UACC_257 12:75961212-78561703,RE:UO_31 12:75884403-77272580	FALSE	FALSE
	NAP1L1	4673	nucleosome assembly protein 1-like 1	12	76438671	76478738	12q21.2	0.449723	0.000352334	1	MDM2	7199351	0	3		CO:HCT_116 12:76148278-76717294,ME:UACC_257 12:75961212-78561703,RE:UO_31 12:75884403-77272580	FALSE	FALSE
	MED9	55090	mediator complex subunit 9	17	17380299	17396534	17p11.2	0.615212	1.69128e-07	0.00276626	MAP2K4	5333248	0	3		LE:RPMI_8226 17:15712672-17570053,PR:DU_145 17:15751600-18022589,PR:RC01 17:15799276-17999828	TRUE	TRUE
	CENPV	201161	centromere protein V	17	16245847	16256812	17p11.2	0.261019	0.0439699	1	MAP2K4	4198796	0	3		LE:RPMI_8226 17:15712672-17570053,PR:DU_145 17:15751600-18022589,PR:RC01 17:15799276-17999828	FALSE	FALSE
	PEMT	10400	phosphatidylethanolamine N-methyltransferase	17	17408876	17495017	17p11.2	0.74763	6.74895e-12	1.21981e-07	MAP2K4	5361825	0	3		LE:RPMI_8226 17:15712672-17570053,PR:DU_145 17:15751600-18022589,PR:RC01 17:15799276-17999828	TRUE	TRUE
	MPRIP	23164	myosin phosphatase Rho interacting protein	17	16946073	17095962	17p11.2	0.324323	0.0114685	1	MAP2K4	4899022	0	3		LE:RPMI_8226 17:15712672-17570053,PR:DU_145 17:15751600-18022589,PR:RC01 17:15799276-17999828	FALSE	FALSE
	TTC19	54902	tetratricopeptide repeat domain 19	17	15902693	15932723	17p12	0.578096	1.31829e-06	0.0206747	MAP2K4	3855642	0	4		LE:RPMI_8226 17:15712672-17570053,PR:DU_145 17:15751600-18022589,RE:CAKI_1 17:13850504-16081289,PR:RC01 17:15799276-17999828	TRUE	TRUE
	SNORD65	692106	small nucleolar RNA, C/D box 65	17	16344539	16344612	17p11.2	0.357336	0.00506496	1	MAP2K4	4297488	0	3		LE:RPMI_8226 17:15712672-17570053,PR:DU_145 17:15751600-18022589,PR:RC01 17:15799276-17999828	FALSE	FALSE
	UBB	7314	ubiquitin B	17	16284366	16286054	17p11.2	0.386337	0.00229656	1	MAP2K4	4237315	0	3		LE:RPMI_8226 17:15712672-17570053,PR:DU_145 17:15751600-18022589,PR:RC01 17:15799276-17999828	FALSE	FALSE
	TRPV2	51393	transient receptor potential cation channel, subfamily V, member 2	17	16318855	16340317	17p11.2	0.00331995	0.979915	1	MAP2K4	4271804	0	3		LE:RPMI_8226 17:15712672-17570053,PR:DU_145 17:15751600-18022589,PR:RC01 17:15799276-17999828	FALSE	FALSE
	ZNF287	57336	zinc finger protein 287	17	16453630	16472520	17p11.2	0.47945	0.000106246	1	MAP2K4	4406579	0	3		LE:RPMI_8226 17:15712672-17570053,PR:DU_145 17:15751600-18022589,PR:RC01 17:15799276-17999828	FALSE	FALSE
	NCOR1	9611	nuclear receptor corepressor 1	17	15933407	16118874	17p12	0.769941	6.47423e-13	1.18032e-08	MAP2K4	3886356	0	4		LE:RPMI_8226 17:15712672-17570053,PR:DU_145 17:15751600-18022589,RE:CAKI_1 17:13850504-16081289,PR:RC01 17:15799276-17999828	TRUE	TRUE
	KRT16P2	400578	keratin 16 pseudogene 2	17	16733796	16736147	17p11.2	0.00783449	0.953039	1	MAP2K4	4686745	0	3		LE:RPMI_8226 17:15712672-17570053,PR:DU_145 17:15751600-18022589,PR:RC01 17:15799276-17999828	FALSE	FALSE
	TNFRSF13B	23495	tumor necrosis factor receptor superfamily, member 13B	17	16842397	16875402	17p11.2	-0.0741076	0.573616	1	MAP2K4	4795346	0	3		LE:RPMI_8226 17:15712672-17570053,PR:DU_145 17:15751600-18022589,PR:RC01 17:15799276-17999828	FALSE	FALSE
	CLTC	1213	clathrin, heavy chain (Hc)	17	57697049	57774317	17q23.1	0.703943	3.51407e-10	6.19846e-06	BRCA1	16419549	1	3	ME:SK_MEL_5 17:56676000-58668369	BR:MCF7 17:57201530-57899434,ME:LOXIMVI 17:57716731-57904697,OV:NCI_ADR_RES 17:57766936-57906431	TRUE	TRUE
	PLD6	201164	phospholipase D family, member 6	17	17104308	17109646	17p11.2	0.38723	0.00223873	1	MAP2K4	5057257	0	3		LE:RPMI_8226 17:15712672-17570053,PR:DU_145 17:15751600-18022589,PR:RC01 17:15799276-17999828	FALSE	FALSE
	NT5M	56953	5',3'-nucleotidase, mitochondrial	17	17206679	17250977	17p11.2	0.351342	0.0059127	1	MAP2K4	5159628	0	3		LE:RPMI_8226 17:15712672-17570053,PR:DU_145 17:15751600-18022589,PR:RC01 17:15799276-17999828	FALSE	FALSE
	RASD1	51655	RAS, dexamethasone-induced 1	17	17397752	17399709	17p11.2	-0.0682823	0.604185	1	MAP2K4	5350701	0	3		LE:RPMI_8226 17:15712672-17570053,PR:DU_145 17:15751600-18022589,PR:RC01 17:15799276-17999828	FALSE	FALSE
	PTRH2	51651	peptidyl-tRNA hydrolase 2	17	57774666	57784856	17q23.1	0.77499	3.672e-13	6.70838e-09	BRCA1	16497166	1	3	ME:SK_MEL_5 17:56676000-58668369	BR:MCF7 17:57201530-57899434,ME:LOXIMVI 17:57716731-57904697,OV:NCI_ADR_RES 17:57766936-57906431	TRUE	TRUE
	HSPA13	6782	heat shock protein 70kDa family, member 13	21	15743436	15755509	21q11.2	0.705109	3.19199e-10	5.63482e-06	RUNX1	20404588	0	3		ME:M14 21:15428725-17505689,ME:MDA_MB_435 21:15369860-17540055,ME:MDA_N 21:15417582-17540576	TRUE	TRUE
	USP25	29761	ubiquitin specific peptidase 25	21	17102495	17252377	21q21.1	0.681662	2.0276e-09	3.52498e-05	RUNX1	18907720	0	3		ME:M14 21:15428725-17505689,ME:MDA_MB_435 21:15369860-17540055,ME:MDA_N 21:15417582-17540576	TRUE	TRUE
	RBM11	54033	RNA binding motif protein 11	21	15588465	15600693	21q11.2	0.37759	0.0029373	1	RUNX1	20559404	0	3		ME:M14 21:15428725-17505689,ME:MDA_MB_435 21:15369860-17540055,ME:MDA_N 21:15417582-17540576	FALSE	FALSE
	NRIP1	8204	nuclear receptor interacting protein 1	21	16333555	16437126	21q11.2:21q21.1	0.47532	0.000124152	1	RUNX1	19722971	0	3		ME:M14 21:15428725-17505689,ME:MDA_MB_435 21:15369860-17540055,ME:MDA_N 21:15417582-17540576	FALSE	FALSE
	SAMSN1	64092	SAM domain, SH3 domain and nuclear localization signals 1	21	15857548	15955723	21q11.2	0.157996	0.227942	1	RUNX1	20204374	0	3		ME:M14 21:15428725-17505689,ME:MDA_MB_435 21:15369860-17540055,ME:MDA_N 21:15417582-17540576	FALSE	FALSE
	LOC388813	388813	uncharacterized protein ENSP00000383407-like	21	15964483	16015428	21q11.2	0.215962	0.0974661	1	RUNX1	20144669	0	3		ME:M14 21:15428725-17505689,ME:MDA_MB_435 21:15369860-17540055,ME:MDA_N 21:15417582-17540576	FALSE	FALSE
	UBE2L3	7332	ubiquitin-conjugating enzyme E2L 3	22	21903735	21978323	22q11.21	0.58464	9.34937e-07	0.0147711	SMARCB1	2150826	0	3		ME:SK_MEL_2 22:20064512-22647780,LC:EKVX 22:20013881-22212684,OV:OVCAR_5 22:21425728-23630559	TRUE	TRUE
	LIPI	149998	lipase, member I	21	15481134	15579254	21q11.2	0.0380425	0.774831	1	RUNX1	20580843	0	3		ME:M14 21:15428725-17505689,ME:MDA_MB_435 21:15369860-17540055,ME:MDA_N 21:15417582-17540576	FALSE	FALSE
	ABCC13	150000	ATP-binding cassette, sub-family C (CFTR/MRP), member 13, pseudogene	21	15646119	15673692	21q11.2	0.094438	0.472922	1	RUNX1	20486405	0	3		ME:M14 21:15428725-17505689,ME:MDA_MB_435 21:15369860-17540055,ME:MDA_N 21:15417582-17540576	FALSE	FALSE
	SDF2L1	23753	stromal cell-derived factor 2-like 1	22	21996541	21998588	22q11.21	0.66547	6.60292e-09	0.000113313	SMARCB1	2130561	0	3		ME:SK_MEL_2 22:20064512-22647780,LC:EKVX 22:20013881-22212684,OV:OVCAR_5 22:21425728-23630559	TRUE	TRUE
	KLHL22	84861	kelch-like 22 (Drosophila)	22	20795805	20850170	22q11.21	0.578268	1.30655e-06	0.0204946	SMARCB1	3278979	5	3	CO:HT29 22:19584787-21275284,ME:MALME_3M 22:18912528-21456518,OV:SK_OV_3 22:20174705-21247870,PR:DU_145(DTP) 22:20100134-21957755,PR:RC01 22:20055495-21964328	ME:SK_MEL_2 22:20064512-22647780,LC:EKVX 22:20013881-22212684,OV:OVCAR_5 22:20052954-20993032	FALSE	FALSE
	MAPK1	5594	mitogen-activated protein kinase 1	22	22113946	22221970	22q11.21:22q11.22	0.868942	2.28946e-19	4.23321e-15	SMARCB1	1907179	0	3		ME:SK_MEL_2 22:20064512-22647780,LC:EKVX 22:20013881-22212684,OV:OVCAR_5 22:21425728-23630559	TRUE	FALSE
	GSTT1	2952	glutathione S-transferase theta 1	22	24376138	24384284	22q11.23	0.0924257	0.482447	1	SMARCB1	199433	1	3	ME:MDA_MB_435 22:23773854-25177108	CNS:SF_268 22:24357430-24391191,OV:OVCAR_5 22:23962711-24737511,RE:UO_31 22:24347904-24394698	FALSE	FALSE
	PPIL2	23759	peptidylprolyl isomerase (cyclophilin)-like 2	22	22020272	22052202	22q11.21	0.803471	1.11187e-14	2.04295e-10	SMARCB1	2076947	0	3		ME:SK_MEL_2 22:20064512-22647780,LC:EKVX 22:20013881-22212684,OV:OVCAR_5 22:21425728-23630559	TRUE	TRUE
	SFI1	9814	Sfi1 homolog, spindle assembly associated (yeast)	22	31892124	32014537	22q12.2	0.558224	3.5801e-06	0.0549214	NF2	1797535	0	3		CO:SW_620 22:31657939-32183478,LC:HOP_62 22:31896795-33150044,OV:OVCAR_5 22:31574028-33030296	FALSE	FALSE
	PRR14L	253143	proline rich 14-like	22	32077333	32146120	22q12.2	0.684645	1.61796e-09	2.81832e-05	NF2	1982744	0	3		CO:SW_620 22:31657939-32183478,LC:HOP_62 22:31896795-33150044,OV:OVCAR_5 22:31574028-33030296	TRUE	FALSE
	TRMT2A	27037	TRM2 tRNA methyltransferase 2 homolog A (S. cerevisiae)	22	20099388	20104818	22q11.21	0.740801	1.31819e-11	2.3755e-07	SMARCB1	4024331	3	3	CO:HT29 22:19584787-21275284,ME:MALME_3M 22:18912528-21456518,PR:RC01 22:20055495-21964328	ME:SK_MEL_2 22:20064512-22647780,LC:EKVX 22:20013881-22212684,OV:OVCAR_5 22:20052954-20993032	FALSE	FALSE
	ZDHHC8	29801	zinc finger, DHHC-type containing 8	22	20119363	20135530	22q11.21	0.588652	7.54492e-07	0.0119798	SMARCB1	3993619	4	3	CO:HT29 22:19584787-21275284,ME:MALME_3M 22:18912528-21456518,PR:DU_145(DTP) 22:20100134-21957755,PR:RC01 22:20055495-21964328	ME:SK_MEL_2 22:20064512-22647780,LC:EKVX 22:20013881-22212684,OV:OVCAR_5 22:20052954-20993032	FALSE	FALSE
	RANBP1	5902	RAN binding protein 1	22	20105023	20114704	22q11.21	0.742317	1.71305e-11	3.0816e-07	SMARCB1	4014445	4	3	CO:HT29 22:19584787-21275284,ME:MALME_3M 22:18912528-21456518,PR:DU_145(DTP) 22:20100134-21957755,PR:RC01 22:20055495-21964328	ME:SK_MEL_2 22:20064512-22647780,LC:EKVX 22:20013881-22212684,OV:OVCAR_5 22:20052954-20993032	FALSE	FALSE
	LOC388849	388849	hypothetical protein LOC388849	22	20136108	20137431	22q11.21	0.115735	0.386964	1	SMARCB1	3991718	4	3	CO:HT29 22:19584787-21275284,ME:MALME_3M 22:18912528-21456518,PR:DU_145(DTP) 22:20100134-21957755,PR:RC01 22:20055495-21964328	ME:SK_MEL_2 22:20064512-22647780,LC:EKVX 22:20013881-22212684,OV:OVCAR_5 22:20052954-20993032	FALSE	FALSE
	RTN4R	65078	reticulon 4 receptor	22	20228937	20255816	22q11.21	0.411788	0.00107952	1	SMARCB1	3873333	5	3	CO:HT29 22:19584787-21275284,ME:MALME_3M 22:18912528-21456518,OV:SK_OV_3 22:20174705-21247870,PR:DU_145(DTP) 22:20100134-21957755,PR:RC01 22:20055495-21964328	ME:SK_MEL_2 22:20064512-22647780,LC:EKVX 22:20013881-22212684,OV:OVCAR_5 22:20052954-20993032	FALSE	FALSE
	LOC150197	150197	hypothetical LOC150197	22	20193854	20196060	22q11.21	0.244348	0.0599007	1	SMARCB1	3933089	5	3	CO:HT29 22:19584787-21275284,ME:MALME_3M 22:18912528-21456518,OV:SK_OV_3 22:20174705-21247870,PR:DU_145(DTP) 22:20100134-21957755,PR:RC01 22:20055495-21964328	ME:SK_MEL_2 22:20064512-22647780,LC:EKVX 22:20013881-22212684,OV:OVCAR_5 22:20052954-20993032	FALSE	FALSE
	DGCR6L	85359	DiGeorge syndrome critical region gene 6-like	22	20301760	20307628	22q11.21	0.657495	1.15043e-08	0.000196206	SMARCB1	3821521	5	3	CO:HT29 22:19584787-21275284,ME:MALME_3M 22:18912528-21456518,OV:SK_OV_3 22:20174705-21247870,PR:DU_145(DTP) 22:20100134-21957755,PR:RC01 22:20055495-21964328	ME:SK_MEL_2 22:20064512-22647780,LC:EKVX 22:20013881-22212684,OV:OVCAR_5 22:20052954-20993032	FALSE	FALSE
	SCARF2	91179	scavenger receptor class F, member 2	22	20778873	20792146	22q11.21	0.151426	0.248114	1	SMARCB1	3337003	5	3	CO:HT29 22:19584787-21275284,ME:MALME_3M 22:18912528-21456518,OV:SK_OV_3 22:20174705-21247870,PR:DU_145(DTP) 22:20100134-21957755,PR:RC01 22:20055495-21964328	ME:SK_MEL_2 22:20064512-22647780,LC:EKVX 22:20013881-22212684,OV:OVCAR_5 22:20052954-20993032	FALSE	FALSE
	ZNF74	7625	zinc finger protein 74	22	20748404	20762753	22q11.21	0.686661	1.38697e-09	2.41888e-05	SMARCB1	3366396	5	3	CO:HT29 22:19584787-21275284,ME:MALME_3M 22:18912528-21456518,OV:SK_OV_3 22:20174705-21247870,PR:DU_145(DTP) 22:20100134-21957755,PR:RC01 22:20055495-21964328	ME:SK_MEL_2 22:20064512-22647780,LC:EKVX 22:20013881-22212684,OV:OVCAR_5 22:20052954-20993032	FALSE	FALSE
	MED15	51586	mediator complex subunit 15	22	20861885	20941919	22q11.21	0.7352	2.24778e-11	4.03836e-07	SMARCB1	3187230	5	3	CO:HT29 22:19584787-21275284,ME:MALME_3M 22:18912528-21456518,OV:SK_OV_3 22:20174705-21247870,PR:DU_145(DTP) 22:20100134-21957755,PR:RC01 22:20055495-21964328	ME:SK_MEL_2 22:20064512-22647780,LC:EKVX 22:20013881-22212684,OV:OVCAR_5 22:20052954-20993032	FALSE	FALSE
	RIMBP3B	440804	RIMS binding protein 3B	22	21738039	21905373	22q11.21	0.25861	0.0460294	1	SMARCB1	2223776	2	3	PR:DU_145(DTP) 22:20100134-21957755,PR:RC01 22:20055495-21964328	ME:SK_MEL_2 22:20064512-22647780,LC:EKVX 22:20013881-22212684,OV:OVCAR_5 22:21425728-23630559	FALSE	FALSE
	HIC2	23119	hypermethylated in cancer 2	22	21771692	21805750	22q11.21	0.802349	1.28972e-14	2.36909e-10	SMARCB1	2323399	2	3	PR:DU_145(DTP) 22:20100134-21957755,PR:RC01 22:20055495-21964328	ME:SK_MEL_2 22:20064512-22647780,LC:EKVX 22:20013881-22212684,OV:OVCAR_5 22:21425728-23630559	FALSE	FALSE
	PI4KAP2	375133	phosphatidylinositol 4-kinase, catalytic, alpha pseudogene 2	22	21827286	21871780	22q11.21	0.760638	1.77444e-12	3.2254e-08	SMARCB1	2257369	2	3	PR:DU_145(DTP) 22:20100134-21957755,PR:RC01 22:20055495-21964328	ME:SK_MEL_2 22:20064512-22647780,LC:EKVX 22:20013881-22212684,OV:OVCAR_5 22:21425728-23630559	FALSE	FALSE
	TMEM191C	645426	transmembrane protein 191C	22	21821458	21824224	22q11.21	0.0125633	0.92476	1	SMARCB1	2304925	2	3	PR:DU_145(DTP) 22:20100134-21957755,PR:RC01 22:20055495-21964328	ME:SK_MEL_2 22:20064512-22647780,LC:EKVX 22:20013881-22212684,OV:OVCAR_5 22:21425728-23630559	FALSE	FALSE
	DEPDC5	9681	DEP domain containing 5	22	32149936	32303020	22q12.2	0.58907	7.37725e-07	0.0117188	NF2	2055347	0	3		CO:SW_620 22:31657939-32183478,LC:HOP_62 22:31896795-33150044,OV:OVCAR_5 22:31574028-33030296	TRUE	TRUE
	CCDC116	164592	coiled-coil domain containing 116	22	21987085	21991616	22q11.21	0.461377	0.000267194	1	SMARCB1	2137533	0	3		ME:SK_MEL_2 22:20064512-22647780,LC:EKVX 22:20013881-22212684,OV:OVCAR_5 22:21425728-23630559	FALSE	FALSE
	APOBEC3B	9582	apolipoprotein B mRNA editing enzyme, catalytic polypeptide-like 3B	22	39378403	39388784	22q13.1	0.58119	1.3896e-06	0.0217708	EP300	2099829	0	4		CNS:SF_268 22:39360417-39384360,CNS:U251 22:39360417-39384360,LC:HOP_62 22:39360417-39386672,LC:NCI_H460 22:38156301-39608977	TRUE	TRUE
	YDJC	150223	YdjC homolog (bacterial)	22	21982377	21984340	22q11.21	0.530396	1.55455e-05	0.228582	SMARCB1	2144809	0	3		ME:SK_MEL_2 22:20064512-22647780,LC:EKVX 22:20013881-22212684,OV:OVCAR_5 22:21425728-23630559	FALSE	FALSE
	HDHD1	8226	haloacid dehalogenase-like hydrolase domain containing 1	X	6966960	7066231	Xp22.31	0.733607	2.6097e-11	4.68546e-07	BCOR	32844267	0	3		CO:SW_620 X:6847660-7431246,OV:OVCAR_3 X:6741074-7118897,RE:RXF_393 X:6889294-7196124	TRUE	TRUE
	YPEL1	29799	yippee-like 1 (Drosophila)	22	22051825	22090071	22q11.21	0.145376	0.267736	1	SMARCB1	2039078	0	3		ME:SK_MEL_2 22:20064512-22647780,LC:EKVX 22:20013881-22212684,OV:OVCAR_5 22:21425728-23630559	FALSE	FALSE
	LOC391322	391322	D-dopachrome tautomerase-like	22	24373116	24374043	22q11.23	0.00907511	0.945613	1	SMARCB1	196411	1	3	ME:MDA_MB_435 22:23773854-25177108	CNS:SF_268 22:24357430-24391191,OV:OVCAR_5 22:23962711-24737511,RE:UO_31 22:24347904-24394698	FALSE	FALSE
	GSTTP2	653399	glutathione S-transferase theta pseudogene 2	22	24385937	24401899	22q11.23	-0.164293	0.217808	1	SMARCB1	209232	1	3	ME:MDA_MB_435 22:23773854-25177108	CNS:SF_268 22:24357430-24391191,OV:OVCAR_5 22:23962711-24737511,RE:UO_31 22:24347904-24394698	FALSE	FALSE
	LRP5L	91355	low density lipoprotein receptor-related protein 5-like	22	25747384	25777544	22q11.23	0.101951	0.438269	1	SMARCB1	1570679	1	3	RE:A498 22:25630181-25913215	CO:HCC_2998 22:25663456-25917864,OV:OVCAR_5 22:25305218-26632789,RE:786_0 22:25674397-25928721	FALSE	FALSE
	IGLL3P	91353	immunoglobulin lambda-like polypeptide 3, pseudogene	22	25714223	25716193	22q11.23	0.222683	0.0929272	1	SMARCB1	1537518	1	3	RE:A498 22:25630181-25913215	CO:HCC_2998 22:25663456-25917864,OV:OVCAR_5 22:25305218-26632789,RE:786_0 22:25674397-25928721	FALSE	FALSE
	CRYBB2P1	1416	crystallin, beta B2 pseudogene 1	22	25844053	25857645	22q11.23	0.275008	0.0334544	1	SMARCB1	1667348	1	3	RE:A498 22:25630181-25913215	CO:HCC_2998 22:25663456-25917864,OV:OVCAR_5 22:25305218-26632789,RE:786_0 22:25674397-25928721	FALSE	FALSE
	PISD	23761	phosphatidylserine decarboxylase	22	32014476	32026810	22q12.2	0.294689	0.0222748	1	NF2	1919887	0	3		CO:SW_620 22:31657939-32183478,LC:HOP_62 22:31896795-33150044,OV:OVCAR_5 22:31574028-33030296	FALSE	FALSE
	NEGR1	257194	neuronal growth regulator 1	1	71868624	72748277	1p31.1	0.276376	0.0325498	1	FUBP1	5665313	0	2		RE:A498 1:72318902-72659736,RE:RXF_393 1:72091918-72908142	FALSE	FALSE
	SMYD3	64754	SET and MYND domain containing 3	1	245912641	246670644	1q44	0.344208	0.00759759	1	IRF6	35933121	0	2		CO:HT29 1:246027140-246201470,RE:UO_31 1:245855385-246246436	FALSE	FALSE
	NAV1	89796	neuron navigator 1	1	201617449	201796102	1q32.1	0.063229	0.631265	1	IRF6	8162865	0	2		BR:MCF7 1:201748272-201981816,PR:PC_3 1:201457637-202707592	FALSE	FALSE
	ELF3	1999	E74-like factor 3 (ets domain transcription factor, epithelial-specific )	1	201979689	201986315	1q32.1	0.1643	0.209685	1	IRF6	7972652	0	2		BR:MCF7 1:201748272-201981816,PR:PC_3 1:201457637-202707592	FALSE	FALSE
	IPO9	55705	importin 9	1	201798287	201853422	1q32.1	0.695437	6.98992e-10	1.22603e-05	IRF6	8105545	0	2		BR:MCF7 1:201748272-201981816,PR:PC_3 1:201457637-202707592	FALSE	FALSE
	TIMM17A	10440	translocase of inner mitochondrial membrane 17 homolog A (yeast)	1	201924618	201939789	1q32.1	0.524728	1.67865e-05	0.246258	IRF6	8019178	0	2		BR:MCF7 1:201748272-201981816,PR:PC_3 1:201457637-202707592	FALSE	FALSE
	SHISA4	149345	shisa homolog 4 (Xenopus laevis)	1	201857796	201861715	1q32.1	0.174807	0.18159	1	IRF6	8097252	0	2		BR:MCF7 1:201748272-201981816,PR:PC_3 1:201457637-202707592	FALSE	FALSE
	LMOD1	25802	leiomodin 1 (smooth muscle)	1	201865583	201915716	1q32.1	0.0812021	0.537382	1	IRF6	8043251	0	2		BR:MCF7 1:201748272-201981816,PR:PC_3 1:201457637-202707592	FALSE	FALSE
	RNPEP	6051	arginyl aminopeptidase (aminopeptidase B)	1	201951765	201975275	1q32.1	0.551079	5.04842e-06	0.0767814	IRF6	7983692	0	2		BR:MCF7 1:201748272-201981816,PR:PC_3 1:201457637-202707592	FALSE	FALSE
	PARD3B	117583	par-3 partitioning defective 3 homolog B (C. elegans)	2	205410515	206484886	2q33.3	0.188474	0.149256	1	ACVR2A	56722122	0	2		CO:HCT_116 2:205422602-205792773,RE:TK_10 2:206065575-206177390	FALSE	FALSE
	ERBB4	2066	v-erb-a erythroblastic leukemia viral oncogene homolog 4 (avian)	2	212240441	213403352	2q34	0.13268	0.312213	1	ACVR2A	63552048	0	2		CNS:U251 2:211338638-214174663,CO:KM12 2:212375944-212904326	FALSE	FALSE
	NBAS	51594	neuroblastoma amplified sequence	2	15307031	15701472	2p24.3	0.47539	0.000123824	1	DNMT3A	9754357	0	2		OV:OVCAR_8 2:15212469-15405738,OV:NCI_ADR_RES 2:15212469-15399111	FALSE	FALSE
	PTPRG	5793	protein tyrosine phosphatase, receptor type, G	3	61547242	62280573	3p14.2	0.470534	0.000148341	1	PBRM1	8827376	0	2		ME:M14 3:61167884-62185384,OV:NCI_ADR_RES 3:62124583-65994050	FALSE	FALSE
	CADM2	253559	cell adhesion molecule 2	3	85008132	86123579	3p12.1	0.0129325	0.921876	1	ROBO1	5191073	0	2		ME:UACC_257 3:85079112-85533849,LC:NCI_H226 3:84584630-86581962	FALSE	FALSE
	NAALADL2	254827	N-acetylated alpha-linked acidic dipeptidase-like 2	3	174577110	175523428	3q26.31	0.347351	0.00654395	1	SI	9780827	0	2		CNS:SF_539 3:174731235-174971321,OV:IGROV1 3:174688940-174815942	FALSE	FALSE
	ADAMTS9	56999	ADAM metallopeptidase with thrombospondin type 1 motif, 9	3	64501330	64673365	3p14.1	0.101964	0.43821	1	PBRM1	11781464	2	2	BR:MCF7 3:63990825-64947927,ME:UACC_62 3:62921398-66659418	LC:NCI_H226 3:64463039-64928104,OV:NCI_ADR_RES 3:62124583-65994050	FALSE	FALSE
	SUCLG2	8801	succinate-CoA ligase, GDP-forming, beta subunit	3	67410883	67705038	3p14.1	0.687972	1.74227e-09	3.03278e-05	ROBO1	10941349	0	2		ME:M14 3:67355226-67748544,ME:SK_MEL_28 3:67351953-67849306	FALSE	FALSE
	EPHA6	285220	EPH receptor A6	3	96533424	97467786	3q11.2	-0.217	0.0987625	1	ROBO1	16716365	0	2		OV:IGROV1 3:97304207-97412231,RE:RXF_393 3:97081289-97215702	FALSE	FALSE
	LSAMP	4045	limbic system-associated membrane protein	3	115521209	116164385	3q13.31	0.312332	0.0151179	1	ROBO1	35704150	0	2		OV:OVCAR_3 3:115983491-116968665,RE:TK_10 3:115809106-115904478	FALSE	FALSE
	KBTBD8	84541	kelch repeat and BTB (POZ) domain containing 8	3	67048726	67061632	3p14.1	0.388028	0.00218819	1	ROBO1	11584755	0	2		ME:UACC_62 3:66720616-67124474,OV:NCI_ADR_RES 3:66304451-67097360	FALSE	FALSE
	NEIL3	55247	nei endonuclease VIII-like 3 (E. coli)	4	178230990	178284092	4q34.3	0.584119	1.19382e-06	0.018762	FBXW7	24774597	0	2		BR:BT_549 4:176122346-179727494,OV:NCI_ADR_RES 4:177955022-179357172	FALSE	FALSE
	CCDC111	201973	coiled-coil domain containing 111	4	185570766	185616112	4q35.1	0.534405	1.30296e-05	0.192552	FBXW7	32114373	0	2		CNS:SNB_19 4:185152959-185613584,CO:HCT_116 4:184331386-185678439	FALSE	FALSE
	FAM160A1	729830	family with sequence similarity 160, member A1	4	152330397	152584784	4q31.3	0.198277	0.128848	1	FBXW7	657625	0	2		OV:OVCAR_8 4:152381022-153376266,OV:NCI_ADR_RES 4:152389177-153384862	FALSE	FALSE
	FBXW7	55294	F-box and WD repeat domain containing 7	4	153242409	153456393	4q31.3	0.584523	9.40757e-07	0.0148602	FBXW7	0	0	2		OV:OVCAR_8 4:152381022-153376266,OV:NCI_ADR_RES 4:152389177-153384862	FALSE	FALSE
	GPM6A	2823	glycoprotein M6A	4	176554087	176923842	4q34.2	0.159185	0.224417	1	FBXW7	23097694	0	2		BR:BT_549 4:176122346-179727494,RE:RXF_393 4:176721555-177241318	FALSE	FALSE
	WDR17	116966	WD repeat domain 17	4	176986984	177103979	4q34.2	0.0162705	0.9018	1	FBXW7	23530591	0	2		BR:BT_549 4:176122346-179727494,RE:RXF_393 4:176721555-177241318	FALSE	FALSE
	LOC285501	285501	hypothetical LOC285501	4	178649910	178911904	4q34.3	0.131651	0.320258	1	FBXW7	25193517	0	2		BR:BT_549 4:176122346-179727494,OV:NCI_ADR_RES 4:177955022-179357172	FALSE	FALSE
	IRF2	3660	interferon regulatory factor 2	4	185308875	185395726	4q35.1	0.467708	0.000164581	1	FBXW7	31852482	0	2		CNS:SNB_19 4:185152959-185613584,CO:HCT_116 4:184331386-185678439	FALSE	FALSE
	ASB5	140458	ankyrin repeat and SOCS box containing 5	4	177134825	177190373	4q34.2	0.0400101	0.761494	1	FBXW7	23678432	0	2		BR:BT_549 4:176122346-179727494,RE:RXF_393 4:176721555-177241318	FALSE	FALSE
	SPATA4	132851	spermatogenesis associated 4	4	177105724	177116822	4q34.2	-0.10562	0.421879	1	FBXW7	23649331	0	2		BR:BT_549 4:176122346-179727494,RE:RXF_393 4:176721555-177241318	FALSE	FALSE
	SPCS3	60559	signal peptidase complex subunit 3 homolog (S. cerevisiae)	4	177241089	177253396	4q34.2	0.526841	1.53009e-05	0.225152	FBXW7	23784696	0	2		BR:BT_549 4:176122346-179727494,RE:RXF_393 4:176721555-177241318	FALSE	FALSE
	AGA	175	aspartylglucosaminidase	4	178351928	178363657	4q34.3	0.525789	1.60245e-05	0.235449	FBXW7	24895535	0	2		BR:BT_549 4:176122346-179727494,OV:NCI_ADR_RES 4:177955022-179357172	FALSE	FALSE
	LOC728175	728175	hypothetical LOC728175	4	185262183	185275130	4q35.1	0.0917943	0.489275	1	FBXW7	31805790	0	2		CNS:SNB_19 4:185152959-185613584,CO:HCT_116 4:184331386-185678439	FALSE	FALSE
	CASP3	836	caspase 3, apoptosis-related cysteine peptidase	4	185548849	185570629	4q35.1	0.661739	8.57888e-09	0.000146759	FBXW7	32092456	0	2		CNS:SNB_19 4:185152959-185613584,CO:HCT_116 4:184331386-185678439	FALSE	FALSE
	CTNND2	1501	catenin (cadherin-associated protein), delta 2 (neural plakophilin-related arm-repeat protein)	5	10971951	11904110	5p15.2	0.183893	0.159578	1	MAST4	53988065	0	2		OV:OVCAR_8 5:11073596-14101010,OV:NCI_ADR_RES 5:11110031-14089361	FALSE	FALSE
	DPYSL3	1809	dihydropyrimidinase-like 3	5	146770370	146889619	5q32	-0.0262057	0.842457	1	CTNNA1	8499647	0	2		PR:PC_3 5:146188710-146916974,RE:TK_10 5:146278838-148075488	FALSE	FALSE
	DNAH5	1767	dynein, axonemal, heavy chain 5	5	13690436	13944589	5p15.2	0.256506	0.0478916	1	MAST4	51947586	0	2		OV:OVCAR_8 5:11073596-14101010,OV:NCI_ADR_RES 5:11110031-14089361	FALSE	FALSE
	PPP2R2B	5521	protein phosphatase 2, regulatory subunit B, beta	5	145969066	146461083	5q32	0.290701	0.0242406	1	CTNNA1	7698343	0	2		PR:PC_3 5:146188710-146916974,RE:TK_10 5:146278838-148075488	FALSE	FALSE
	STK32A	202374	serine/threonine kinase 32A	5	146614578	146763768	5q32	-0.152611	0.244389	1	CTNNA1	8343855	0	2		PR:PC_3 5:146188710-146916974,RE:TK_10 5:146278838-148075488	FALSE	FALSE
	LPCAT1	79888	lysophosphatidylcholine acyltransferase 1	5	1461541	1524076	5p15.33	0.484155	8.87556e-05	1	MAST4	64368099	0	2		OV:OVCAR_8 5:1504588-1517576,RE:RXF_393 5:1323208-1527624	FALSE	FALSE
	EYS	346007	eyes shut homolog (Drosophila)	6	64429875	66417118	6q12	-0.0727821	0.580509	1	TTK	14297203	2	2	BR:T47D 6:63953519-66923930,CO:COLO205 6:64084170-68225087	RE:SN12C 6:65529071-69917728,PR:RC01 6:62738088-66292128	FALSE	FALSE
	KHDRBS2	202559	KH domain containing, RNA binding, signal transduction associated 2	6	62389864	62996100	6q11.1	0.0642483	0.625762	1	TTK	17718221	0	2		BR:T47D 6:61959650-63936566,PR:RC01 6:62738088-66292128	FALSE	FALSE
	BAI3	577	brain-specific angiogenesis inhibitor 3	6	69345631	70099403	6q12:6q13	0.132004	0.314706	1	TTK	10614918	0	2		LC:HOP_62 6:67025864-70580860,RE:SN12C 6:65529071-69917728	FALSE	FALSE
	LOC441155	441155	zinc finger CCCH-type domain-containing pseudogene	6	66011310	66015504	6q12	0.0836334	0.528851	1	TTK	14698817	2	2	BR:T47D 6:63953519-66923930,CO:COLO205 6:64084170-68225087	RE:SN12C 6:65529071-69917728,PR:RC01 6:62738088-66292128	FALSE	FALSE
	IMMP2L	83943	IMP2 inner mitochondrial membrane peptidase-like (S. cerevisiae)	7	110303105	111202573	7q31.1	0.478025	0.000112135	1	EZH2	37301890	0	2		CO:HCT_15 7:110189565-110606813,RE:RXF_393 7:110405738-110785645	FALSE	FALSE
	TARP	445347	TCR gamma alternate reading frame protein	7	38299243	38313248	7p14.1	-0.284596	0.0289148	1	EZH2	110191215	0	2		LE:CCRF_CEM 7:38293376-38386255,LE:SR 7:38303943-38388697	FALSE	FALSE
	COL1A2	1278	collagen, type I, alpha 2	7	94023872	94060544	7q21.3	0.0262123	0.842417	1	EZH2	54443919	0	2		LC:NCI_H322M 7:93741856-94161636,LC:NCI_H460 7:92614766-95002898	FALSE	FALSE
	CASD1	64921	CAS1 domain containing 1	7	94139169	94186328	7q21.3	0.510864	3.0373e-05	0.43728	EZH2	54318135	0	2		LC:NCI_H322M 7:93741856-94161636,LC:NCI_H460 7:92614766-95002898	FALSE	FALSE
	CSMD1	64478	CUB and Sushi multiple domains 1	8	2792874	4852328	8p23.2	0.174548	0.182246	1	TUSC3	10545267	0	2		LC:NCI_H460 8:4257232-5536675,RE:ACHN 8:3454081-3481046	FALSE	FALSE
	ASAP1	50807	ArfGAP with SH3 domain, ankyrin repeat and PH domain 1	8	131064350	131455906	8q24.21	0.592745	6.04451e-07	0.00963918	NKX3-1	107523900	0	2		LC:NCI_H23 8:130750567-131549656,PR:PC_3 8:129655930-131465409	FALSE	FALSE
	NSMAF	8439	neutral sphingomyelinase (N-SMase) activation associated factor	8	59496063	59572404	8q12.1	0.722164	7.40142e-11	1.32093e-06	NKX3-1	35955613	0	2		OV:OVCAR_8 8:56940809-59610383,OV:NCI_ADR_RES 8:56940809-59610383	FALSE	FALSE
	FAM110B	90362	family with sequence similarity 110, member B	8	58907112	59062277	8q12.1	0.193077	0.139393	1	NKX3-1	35366662	0	2		OV:OVCAR_8 8:56940809-59610383,OV:NCI_ADR_RES 8:56940809-59610383	FALSE	FALSE
	SYBU	55638	syntabulin (syntaxin-interacting)	8	110586404	110704020	8q23.2	0.265516	0.040328	1	NKX3-1	87045954	0	2		OV:OVCAR_8 8:110505963-114827702,OV:NCI_ADR_RES 8:110505963-114830529	FALSE	FALSE
	PKHD1L1	93035	polycystic kidney and hepatic disease 1 (autosomal recessive)-like 1	8	110374705	110543500	8q23.1:8q23.2	0.213933	0.10073	1	NKX3-1	86834255	0	2		OV:OVCAR_8 8:110505963-114827702,OV:NCI_ADR_RES 8:110505963-114830529	FALSE	FALSE
	MTSS1	9788	metastasis suppressor 1	8	125563027	125740730	8q24.13	0.36802	0.00381606	1	NKX3-1	102022577	0	2		BR:MDA_MB_231 8:125462548-126406377,PR:PC_3 8:125140523-127273426	FALSE	FALSE
	KIAA0196	9897	KIAA0196	8	126036502	126104061	8q24.13	0.76916	7.05878e-13	1.28646e-08	NKX3-1	102496052	0	2		BR:MDA_MB_231 8:125462548-126406377,PR:PC_3 8:125140523-127273426	FALSE	FALSE
	NSMCE2	286053	non-SMC element 2, MMS21 homolog (S. cerevisiae)	8	126104082	126379367	8q24.13	0.663757	7.44984e-09	0.000127616	NKX3-1	102563632	0	2		BR:MDA_MB_231 8:125462548-126406377,PR:PC_3 8:125140523-127273426	FALSE	FALSE
	LOC157381	157381	hypothetical LOC157381	8	125954249	125963337	8q24.13	-0.106777	0.42086	1	NKX3-1	102413799	0	2		BR:MDA_MB_231 8:125462548-126406377,PR:PC_3 8:125140523-127273426	FALSE	FALSE
	FAM49B	51571	family with sequence similarity 49, member B	8	130851838	131028897	8q24.21	0.607315	2.6762e-07	0.00434375	NKX3-1	107311388	0	2		LC:NCI_H23 8:130750567-131549656,PR:PC_3 8:129655930-131465409	FALSE	FALSE
	RPS20	6224	ribosomal protein S20	8	56980738	56987140	8q12.1	0.323489	0.0124474	1	NKX3-1	33440288	0	2		OV:OVCAR_8 8:56940809-59610383,OV:NCI_ADR_RES 8:56940809-59610383	FALSE	FALSE
	SNORD54	26795	small nucleolar RNA, C/D box 54	8	56986397	56986460	8q12.1	0.294014	0.0225977	1	NKX3-1	33445947	0	2		OV:OVCAR_8 8:56940809-59610383,OV:NCI_ADR_RES 8:56940809-59610383	FALSE	FALSE
	PLAG1	5324	pleiomorphic adenoma gene 1	8	57073467	57123859	8q12.1	0.0969826	0.461024	1	NKX3-1	33533017	0	2		OV:OVCAR_8 8:56940809-59610383,OV:NCI_ADR_RES 8:56940809-59610383	FALSE	FALSE
	CHCHD7	79145	coiled-coil-helix-coiled-coil-helix domain containing 7	8	57124314	57131176	8q12.1	0.348413	0.00637051	1	NKX3-1	33583864	0	2		OV:OVCAR_8 8:56940809-59610383,OV:NCI_ADR_RES 8:56940809-59610383	FALSE	FALSE
	CCND1	595	cyclin D1	11	69455872	69469242	11q13.3	0.442926	0.000394192	1	MEN1	4877106	4	0	CNS:SF_295 11:68619376-69645892,ME:SK_MEL_28 11:68844157-69658878,ME:SK_MEL_5 11:68544562-72066913,RE:TK_10 11:67421267-70356321		FALSE	FALSE
	SDR16C5	195814	short chain dehydrogenase/reductase family 16C, member 5	8	57212569	57233241	8q12.1	0.113336	0.388571	1	NKX3-1	33672119	0	2		OV:OVCAR_8 8:56940809-59610383,OV:NCI_ADR_RES 8:56940809-59610383	FALSE	FALSE
	PENK	5179	proenkephalin	8	57353512	57359282	8q12.1	0.0518309	0.696636	1	NKX3-1	33813062	0	2		OV:OVCAR_8 8:56940809-59610383,OV:NCI_ADR_RES 8:56940809-59610383	FALSE	FALSE
	IMPAD1	54928	inositol monophosphatase domain containing 1	8	57870487	57906430	8q12.1	0.790511	5.83747e-14	1.07018e-09	NKX3-1	34330037	0	2		OV:OVCAR_8 8:56940809-59610383,OV:NCI_ADR_RES 8:56940809-59610383	FALSE	FALSE
	LOC286177	286177	hypothetical LOC286177	8	58173784	58179170	8q12.1	-0.00264977	0.984109	1	NKX3-1	34633334	0	2		OV:OVCAR_8 8:56940809-59610383,OV:NCI_ADR_RES 8:56940809-59610383	FALSE	FALSE
	UBXN2B	137886	UBX domain protein 2B	8	59323822	59364060	8q12.1	0.567078	2.31238e-06	0.035821	NKX3-1	35783372	0	2		OV:OVCAR_8 8:56940809-59610383,OV:NCI_ADR_RES 8:56940809-59610383	FALSE	FALSE
	SDCBP	6386	syndecan binding protein (syntenin)	8	59465727	59495419	8q12.1	0.376868	0.00299673	1	NKX3-1	35925277	0	2		OV:OVCAR_8 8:56940809-59610383,OV:NCI_ADR_RES 8:56940809-59610383	FALSE	FALSE
	CYP7A1	1581	cytochrome P450, family 7, subfamily A, polypeptide 1	8	59402736	59412720	8q12.1	-0.0633662	0.633511	1	NKX3-1	35862286	0	2		OV:OVCAR_8 8:56940809-59610383,OV:NCI_ADR_RES 8:56940809-59610383	FALSE	FALSE
	EBAG9	9166	estrogen receptor binding site associated, antigen, 9	8	110551928	110577391	8q23.2	0.513768	3.15843e-05	0.454182	NKX3-1	87011478	0	2		OV:OVCAR_8 8:110505963-114827702,OV:NCI_ADR_RES 8:110505963-114830529	FALSE	FALSE
	KCNV1	27012	potassium channel, subfamily V, member 1	8	110979232	110986959	8q23.2	0.0245558	0.85226	1	NKX3-1	87438782	0	2		OV:OVCAR_8 8:110505963-114827702,OV:NCI_ADR_RES 8:110505963-114830529	FALSE	FALSE
	NDUFB9	4715	NADH dehydrogenase (ubiquinone) 1 beta subcomplex, 9, 22kDa	8	125551342	125562227	8q24.13	0.666493	6.1414e-09	0.000105509	NKX3-1	102010892	0	2		BR:MDA_MB_231 8:125462548-126406377,PR:PC_3 8:125140523-127273426	FALSE	FALSE
	TATDN1	83940	TatD DNase domain containing 1	8	125500734	125551329	8q24.13	0.836431	1.62306e-16	2.99519e-12	NKX3-1	101960284	0	2		BR:MDA_MB_231 8:125462548-126406377,PR:PC_3 8:125140523-127273426	FALSE	FALSE
	RNF139	11236	ring finger protein 139	8	125487007	125500859	8q24.13	0.801707	1.40328e-14	2.5767e-10	NKX3-1	101946557	0	2		BR:MDA_MB_231 8:125462548-126406377,PR:PC_3 8:125140523-127273426	FALSE	FALSE
	TRMT12	55039	tRNA methyltransferase 12 homolog (S. cerevisiae)	8	125463047	125465266	8q24.13	0.0768673	0.559388	1	NKX3-1	101922597	0	2		BR:MDA_MB_231 8:125462548-126406377,PR:PC_3 8:125140523-127273426	FALSE	FALSE
	SQLE	6713	squalene epoxidase	8	126010719	126034525	8q24.13	0.553616	4.47256e-06	0.0682557	NKX3-1	102470269	0	2		BR:MDA_MB_231 8:125462548-126406377,PR:PC_3 8:125140523-127273426	FALSE	FALSE
	ZNF572	137209	zinc finger protein 572	8	125985538	125991630	8q24.13	0.601743	3.67205e-07	0.00591714	NKX3-1	102445088	0	2		BR:MDA_MB_231 8:125462548-126406377,PR:PC_3 8:125140523-127273426	FALSE	FALSE
	POU5F1B	5462	POU class 5 homeobox 1B	8	128427856	128429441	8q24.21	0.128669	0.331435	1	NKX3-1	104887406	0	2		LE:HL_60 8:128346761-128686964,PR:PC_3 8:127655433-128721833	FALSE	FALSE
	LOC727677	727677	hypothetical LOC727677	8	128455594	128494384	8q24.21	-0.166859	0.202576	1	NKX3-1	104915144	0	2		LE:HL_60 8:128346761-128686964,PR:PC_3 8:127655433-128721833	FALSE	FALSE
	GSDMC	56169	gasdermin C	8	130760441	130799134	8q24.21	0.147961	0.259229	1	NKX3-1	107219991	0	2		LC:NCI_H23 8:130750567-131549656,PR:PC_3 8:129655930-131465409	FALSE	FALSE
	MLLT3	4300	myeloid/lymphoid or mixed-lineage leukemia (trithorax homolog, Drosophila); translocated to, 3	9	20344967	20622514	9p21.3	0.328558	0.0103758	1	CDKN2A	1345236	1	2	BR:MDA_MB_231 9:18092442-20828271	LC:NCI_H322M 9:20272274-22148864,RE:ACHN 9:20164965-21990783	FALSE	FALSE
	ZCCHC7	84186	zinc finger, CCHC domain containing 7	9	37120468	37358145	9p13.2	0.404195	0.00149885	1	PAX5	85992	0	2		CNS:SNB_19 9:37148156-37294189,CNS:U251 9:37145393-37294189	FALSE	FALSE
	PTPLAD2	401494	protein tyrosine phosphatase-like A domain containing 2	9	21006364	21031635	9p21.3	0.125301	0.340122	1	CDKN2A	936115	0	2		LC:NCI_H322M 9:20272274-22148864,RE:ACHN 9:20164965-21990783	FALSE	FALSE
	IFNW1	3467	interferon, omega 1	9	21140630	21142144	9p21.3	-0.0373247	0.778971	1	CDKN2A	825606	1	2	ME:SK_MEL_2 9:21073413-21874110	LC:NCI_H322M 9:20272274-22148864,RE:ACHN 9:20164965-21990783	FALSE	FALSE
	IFNA21	3452	interferon, alpha 21	9	21165635	21166659	9p21.3	-0.0293332	0.823938	1	CDKN2A	801091	1	2	ME:SK_MEL_2 9:21073413-21874110	LC:NCI_H322M 9:20272274-22148864,RE:ACHN 9:20164965-21990783	FALSE	FALSE
	DIAPH2	1730	diaphanous homolog 2 (Drosophila)	X	95939661	96855597	Xq21.33	0.197968	0.129458	1	ATRX	18897942	0	2		BR:T47D X:96274177-96512328,LE:RPMI_8226 X:96366884-96751442	FALSE	FALSE
	STS	412	steroid sulfatase (microsomal), isozyme S	X	7137471	7272682	Xp22.31	0.449477	0.000314932	1	BCOR	32637816	0	2		CO:SW_620 X:6847660-7431246,RE:RXF_393 X:6889294-7196124	FALSE	FALSE
	RNLS	55328	renalase, FAD-dependent amine oxidase	10	90033620	90343082	10q23.31	0.136777	0.29737	1	PTEN	305088	0	2		CNS:SF_539 10:89260683-91160748,PR:PC_3 10:89676640-90493492	FALSE	FALSE
	NT5C2	22978	5'-nucleotidase, cytosolic II	10	104847773	104953063	10q24.32:10q24.33	0.547211	6.06079e-06	0.0917483	PTEN	15119241	0	2		OV:OVCAR_4 10:104264144-105652437,OV:SK_OV_3 10:104233860-105212924	FALSE	FALSE
	VTI1A	143187	vesicle transport through interaction with t-SNAREs homolog 1A (yeast)	10	114206755	114578504	10q25.2	0.601303	3.76411e-07	0.00606398	PTEN	24478223	0	2		CO:KM12 10:114166865-114430784,OV:OVCAR_4 10:114143797-115794065	FALSE	FALSE
	TAF3	83860	TAF3 RNA polymerase II, TATA box binding protein (TBP)-associated factor, 140kDa	10	7860466	8057016	10p14	0.810094	4.53993e-15	8.35437e-11	GATA3	39650	0	2		ME:MDA_MB_435 10:7777181-8035025,ME:MDA_N 10:7769938-8033458	FALSE	FALSE
	EPC1	80314	enhancer of polycomb homolog 1 (Drosophila)	10	32556643	32667726	10p11.22	0.6659	6.4051e-09	0.000109982	GATA3	24439479	0	2		LC:NCI_H226 10:32299707-34077982,PR:PC_3 10:31593961-32592464	FALSE	FALSE
	ATAD1	84896	ATPase family, AAA domain containing 1	10	89512874	89577917	10q23.31	0.855296	3.32306e-18	6.14135e-14	PTEN	45277	1	2	OV:OVCAR_4 10:88083026-89996584	CNS:SF_539 10:89260683-91160748,RE:RXF_393 10:89540437-89658332	FALSE	FALSE
	SUFU	51684	suppressor of fused homolog (Drosophila)	10	104263718	104393214	10q24.32	0.624341	9.79282e-08	0.00161572	PTEN	14535186	0	2		OV:OVCAR_4 10:104264144-105652437,OV:SK_OV_3 10:104233860-105212924	FALSE	FALSE
	ARL3	403	ADP-ribosylation factor-like 3	10	104433483	104474190	10q24.32	0.463071	0.000194795	1	PTEN	14704951	0	2		OV:OVCAR_4 10:104264144-105652437,OV:SK_OV_3 10:104233860-105212924	FALSE	FALSE
	CNNM2	54805	cyclin M2	10	104678074	104838344	10q24.32	0.536802	9.80204e-06	0.146109	PTEN	14949542	0	2		OV:OVCAR_4 10:104264144-105652437,OV:SK_OV_3 10:104233860-105212924	FALSE	FALSE
	CYP17A1	1586	cytochrome P450, family 17, subfamily A, polypeptide 1	10	104590287	104597290	10q24.32	0.0563017	0.669178	1	PTEN	14861755	0	2		OV:OVCAR_4 10:104264144-105652437,OV:SK_OV_3 10:104233860-105212924	FALSE	FALSE
	SH3PXD2A	9644	SH3 and PX domains 2A	10	105353783	105615164	10q24.33	0.0533327	0.68569	1	PTEN	15625251	0	2		LE:SR 10:105228648-107333210,OV:OVCAR_4 10:104264144-105652437	FALSE	FALSE
	OBFC1	79991	oligonucleotide/oligosaccharide-binding fold containing 1	10	105637317	105678045	10q24.33	0.450455	0.000304433	1	PTEN	15908785	0	2		LE:SR 10:105228648-107333210,OV:OVCAR_4 10:104264144-105652437	FALSE	FALSE
	ACSL5	51703	acyl-CoA synthetase long-chain family member 5	10	114133915	114188138	10q25.2	0.0678774	0.606336	1	PTEN	24405383	0	2		CO:KM12 10:114166865-114430784,OV:OVCAR_4 10:114143797-115794065	FALSE	FALSE
	DCLRE1A	9937	DNA cross-link repair 1A	10	115594482	115614163	10q25.3	0.642604	3.10772e-08	0.00052275	PTEN	25865950	0	2		CNS:SF_268 10:115608115-115676597,OV:OVCAR_4 10:114143797-115794065	FALSE	FALSE
	ATP5C1	509	ATP synthase, H+ transporting, mitochondrial F1 complex, gamma polypeptide 1	10	7830092	7849762	10p14	0.74602	1.19904e-11	2.16139e-07	GATA3	246904	0	2		ME:MDA_MB_435 10:7777181-8035025,ME:MDA_N 10:7769938-8033458	FALSE	FALSE
	KIN	22944	KIN, antigenic determinant of recA protein homolog (mouse)	10	7792924	7829990	10p14	0.606214	3.6133e-07	0.00582572	GATA3	266676	0	2		ME:MDA_MB_435 10:7777181-8035025,ME:MDA_N 10:7769938-8033458	FALSE	FALSE
	ITIH2	3698	inter-alpha (globulin) inhibitor H2	10	7745235	7791483	10p14	0.197329	0.134119	1	GATA3	305183	0	2		ME:MDA_MB_435 10:7777181-8035025,ME:MDA_N 10:7769938-8033458	FALSE	FALSE
	KIF5B	3799	kinesin family member 5B	10	32297937	32345371	10p11.22	0.550721	5.13506e-06	0.0780632	GATA3	24180773	0	2		LC:NCI_H226 10:32299707-34077982,PR:PC_3 10:31593961-32592464	FALSE	FALSE
	MAT1A	4143	methionine adenosyltransferase I, alpha	10	82031575	82049434	10q23.1	0.00575049	0.965218	1	PTEN	7573760	0	2		BR:T47D 10:81689350-82133368,PR:PC_3 10:82040014-82295910	FALSE	FALSE
	DYDC2	84332	DPY30 domain containing 2	10	82104500	82127829	10q23.1	0.0403267	0.759663	1	PTEN	7495365	0	2		BR:T47D 10:81689350-82133368,PR:PC_3 10:82040014-82295910	FALSE	FALSE
	DYDC1	143241	DPY30 domain containing 1	10	82095860	82116514	10q23.1	0.160222	0.221372	1	PTEN	7506680	0	2		BR:T47D 10:81689350-82133368,PR:PC_3 10:82040014-82295910	FALSE	FALSE
	LIPF	8513	lipase, gastric	10	90424145	90438572	10q23.31	-0.0543945	0.682411	1	PTEN	695613	0	2		CNS:SF_539 10:89260683-91160748,PR:PC_3 10:89676640-90493492	FALSE	FALSE
	LIPJ	142910	lipase, family member J	10	90346518	90366733	10q23.31	0.0738641	0.574879	1	PTEN	617986	0	2		CNS:SF_539 10:89260683-91160748,PR:PC_3 10:89676640-90493492	FALSE	FALSE
	LIPK	643414	lipase, family member K	10	90484300	90512513	10q23.31	0.0993153	0.454227	1	PTEN	755768	0	2		CNS:SF_539 10:89260683-91160748,PR:PC_3 10:89676640-90493492	FALSE	FALSE
	TRIM8	81603	tripartite motif containing 8	10	104404251	104418076	10q24.32	0.567117	2.30796e-06	0.0357549	PTEN	14675719	0	2		OV:OVCAR_4 10:104264144-105652437,OV:SK_OV_3 10:104233860-105212924	FALSE	FALSE
	SFXN2	118980	sideroflexin 2	10	104474297	104498946	10q24.32	0.549929	5.33161e-06	0.0809711	PTEN	14745765	0	2		OV:OVCAR_4 10:104264144-105652437,OV:SK_OV_3 10:104233860-105212924	FALSE	FALSE
	C10orf32	119032	chromosome 10 open reading frame 32	10	104613966	104624718	10q24.32	0.593594	5.77069e-07	0.00921579	PTEN	14885434	0	2		OV:OVCAR_4 10:104264144-105652437,OV:SK_OV_3 10:104233860-105212924	FALSE	FALSE
	AS3MT	57412	arsenic (+3 oxidation state) methyltransferase	10	104629209	104661655	10q24.32	0.288628	0.0253187	1	PTEN	14900677	0	2		OV:OVCAR_4 10:104264144-105652437,OV:SK_OV_3 10:104233860-105212924	FALSE	FALSE
	INA	9118	internexin neuronal intermediate filament protein, alpha	10	105036919	105050108	10q24.33	0.0728096	0.580365	1	PTEN	15308387	0	2		OV:OVCAR_4 10:104264144-105652437,OV:SK_OV_3 10:104233860-105212924	FALSE	FALSE
	PCGF6	84108	polycomb group ring finger 6	10	105062552	105110891	10q24.33	0.541638	7.85574e-06	0.117985	PTEN	15334020	0	2		OV:OVCAR_4 10:104264144-105652437,OV:SK_OV_3 10:104233860-105212924	FALSE	FALSE
	LOC729020	729020	rcRPE	10	105005643	105007773	10q24.33	0.0228689	0.862307	1	PTEN	15277111	0	2		OV:OVCAR_4 10:104264144-105652437,OV:SK_OV_3 10:104233860-105212924	FALSE	FALSE
	CALHM2	51063	calcium homeostasis modulator 2	10	105206542	105212162	10q24.33	0.193376	0.13877	1	PTEN	15478010	0	2		OV:OVCAR_4 10:104264144-105652437,OV:SK_OV_3 10:104233860-105212924	FALSE	FALSE
	TAF5	6877	TAF5 RNA polymerase II, TATA box binding protein (TBP)-associated factor, 100kDa	10	105127723	105148822	10q24.33	0.495982	5.58143e-05	0.787651	PTEN	15399191	0	2		OV:OVCAR_4 10:104264144-105652437,OV:SK_OV_3 10:104233860-105212924	FALSE	FALSE
	CALHM3	119395	calcium homeostasis modulator 3	10	105232560	105238997	10q24.33	0.0700125	0.595031	1	PTEN	15504028	0	2		LE:SR 10:105228648-107333210,OV:OVCAR_4 10:104264144-105652437	FALSE	FALSE
	USMG5	84833	up-regulated during skeletal muscle growth 5 homolog (mouse)	10	105148808	105156270	10q24.33	0.677525	2.76086e-09	4.7865e-05	PTEN	15420276	0	2		OV:OVCAR_4 10:104264144-105652437,OV:SK_OV_3 10:104233860-105212924	FALSE	FALSE
	PDCD11	22984	programmed cell death 11	10	105156411	105206019	10q24.33	0.591884	6.33484e-07	0.0100965	PTEN	15427879	0	2		OV:OVCAR_4 10:104264144-105652437,OV:SK_OV_3 10:104233860-105212924	FALSE	FALSE
	NEURL	9148	neuralized homolog (Drosophila)	10	105253734	105352309	10q24.33	0.212072	0.103798	1	PTEN	15525202	0	2		LE:SR 10:105228648-107333210,OV:OVCAR_4 10:104264144-105652437	FALSE	FALSE
	ZDHHC6	64429	zinc finger, DHHC-type containing 6	10	114190057	114206672	10q25.2	0.521435	1.93706e-05	0.282791	PTEN	24461525	0	2		CO:KM12 10:114166865-114430784,OV:OVCAR_4 10:114143797-115794065	FALSE	FALSE
	NHLRC2	374354	NHL repeat containing 2	10	115614390	115672265	10q25.3	0.701114	4.42886e-10	7.79878e-06	PTEN	25885858	0	2		CNS:SF_268 10:115608115-115676597,OV:OVCAR_4 10:114143797-115794065	FALSE	FALSE
	LOC100130987	100130987	similar to hCG1815675	11	67085309	67159158	11q13.2	0.653198	2.05223e-08	0.000347093	MEN1	2506543	0	2		CNS:SF_295 11:65763081-68599682,LE:RPMI_8226 11:66649574-67173417	FALSE	FALSE
	STIP1	10963	stress-induced-phosphoprotein 1	11	63953586	63972020	11q13.1	0.417484	0.00100272	1	MEN1	598965	0	2		LC:HOP_62 11:62698979-64133652,LC:NCI_H322M 11:63875270-63962068	FALSE	FALSE
	PDE2A	5138	phosphodiesterase 2A, cGMP-stimulated	11	72287183	72385497	11q13.4	0.0716632	0.586356	1	MEN1	7708417	0	2		ME:SK_MEL_2 11:70803936-74754489,LC:HOP_62 11:71254228-73014538	FALSE	FALSE
	RAB6A	5870	RAB6A, member RAS oncogene family	11	73386682	73472201	11q13.4	0.690323	1.04513e-09	1.82772e-05	MEN1	8807916	0	2		ME:SK_MEL_2 11:70803936-74754489,OV:OVCAR_3 11:73255955-75102625	FALSE	FALSE
	CNTN5	53942	contactin 5	11	98891705	100229616	11q22.1	0.138533	0.295385	1	ATM	7863942	0	2		CNS:SF_268 11:99080714-99426957,LC:EKVX 11:99451993-100885639	FALSE	FALSE
	OSBP	5007	oxysterol binding protein	11	59341870	59383617	11q12.1	0.710391	2.05263e-10	3.63685e-06	MEN1	5187368	0	2		LE:RPMI_8226 11:58805601-60688506,LC:NCI_H322M 11:57633661-60123634	FALSE	FALSE
	MACROD1	28992	MACRO domain containing 1	11	63766029	63933585	11q13.1	0.584694	9.32241e-07	0.0147294	MEN1	637400	0	2		LC:HOP_62 11:62698979-64133652,LC:NCI_H322M 11:63875270-63962068	FALSE	FALSE
	PC	5091	pyruvate carboxylase	11	66615996	66725847	11q13.2	0.0620682	0.637556	1	MEN1	2037230	0	2		CNS:SF_295 11:65763081-68599682,LE:RPMI_8226 11:66649574-67173417	FALSE	FALSE
	KDM2A	22992	lysine (K)-specific demethylase 2A	11	66886739	67025550	11q13.2	0.810352	4.38105e-15	8.06244e-11	MEN1	2307973	0	2		CNS:SF_295 11:65763081-68599682,LE:RPMI_8226 11:66649574-67173417	FALSE	FALSE
	CPT1A	1374	carnitine palmitoyltransferase 1A (liver)	11	68522087	68609399	11q13.3	0.35644	0.00518447	1	MEN1	3943321	1	2	RE:TK_10 11:67421267-70356321	CNS:SF_295 11:65763081-68599682,ME:SK_MEL_28 11:68595388-68831059	FALSE	FALSE
	NADSYN1	55191	NAD synthetase 1	11	71164216	71212581	11q13.4	0.383349	0.0024998	1	MEN1	6585450	1	2	ME:SK_MEL_5 11:68544562-72066913	ME:SK_MEL_2 11:70803936-74754489,LC:EKVX 11:70339364-72091902	FALSE	FALSE
	FAM168A	23201	family with sequence similarity 168, member A	11	73117027	73309228	11q13.4	0.491887	6.56656e-05	0.921288	MEN1	8538261	1	2	LC:HOP_62 11:73022691-73449177	ME:SK_MEL_2 11:70803936-74754489,OV:OVCAR_3 11:73255955-75102625	FALSE	FALSE
	P2RY6	5031	pyrimidinergic receptor P2Y, G-protein coupled, 6	11	72975549	73009670	11q13.4	0.244494	0.059743	1	MEN1	8396783	1	2	OV:OVCAR_3 11:72493282-73214167	ME:SK_MEL_2 11:70803936-74754489,LC:HOP_62 11:71254228-73014538	FALSE	FALSE
	FCHSD2	9873	FCH and double SH3 domains 2	11	72547789	72853143	11q13.4	0.588505	7.60502e-07	0.012073	MEN1	7969023	1	2	OV:OVCAR_3 11:72493282-73214167	ME:SK_MEL_2 11:70803936-74754489,LC:HOP_62 11:71254228-73014538	FALSE	FALSE
	STARD10	10809	StAR-related lipid transfer (START) domain containing 10	11	72465773	72504750	11q13.4	0.460033	0.000217251	1	MEN1	7887007	0	2		ME:SK_MEL_2 11:70803936-74754489,LC:HOP_62 11:71254228-73014538	FALSE	FALSE
	POLD3	10714	polymerase (DNA-directed), delta 3, accessory subunit	11	74303574	74354105	11q13.4	0.687634	1.287e-09	2.24633e-05	MEN1	9724808	0	2		ME:SK_MEL_2 11:70803936-74754489,OV:OVCAR_3 11:73255955-75102625	FALSE	FALSE
	PGM2L1	283209	phosphoglucomutase 2-like 1	11	74041360	74109502	11q13.4	0.266161	0.0398264	1	MEN1	9462594	0	2		ME:SK_MEL_2 11:70803936-74754489,OV:OVCAR_3 11:73255955-75102625	FALSE	FALSE
	PPME1	51400	protein phosphatase methylesterase 1	11	73882107	73965748	11q13.4	0.27294	0.0348622	1	MEN1	9303341	0	2		ME:SK_MEL_2 11:70803936-74754489,OV:OVCAR_3 11:73255955-75102625	FALSE	FALSE
	MRPL48	51642	mitochondrial ribosomal protein L48	11	73498916	73575656	11q13.4	0.535975	1.01765e-05	0.151538	MEN1	8920150	0	2		ME:SK_MEL_2 11:70803936-74754489,OV:OVCAR_3 11:73255955-75102625	FALSE	FALSE
	DNAJB13	374407	DnaJ (Hsp40) homolog, subfamily B, member 13	11	73661363	73681332	11q13.4	-0.0140739	0.915744	1	MEN1	9082597	0	2		ME:SK_MEL_2 11:70803936-74754489,OV:OVCAR_3 11:73255955-75102625	FALSE	FALSE
	C2CD3	26005	C2 calcium-dependent domain containing 3	11	73745479	73882064	11q13.4	0.616386	2.02052e-07	0.00329688	MEN1	9166713	0	2		ME:SK_MEL_2 11:70803936-74754489,OV:OVCAR_3 11:73255955-75102625	FALSE	FALSE
	XRRA1	143570	X-ray radiation resistance associated 1	11	74551954	74660232	11q13.4	0.368064	0.00381151	1	MEN1	9973188	0	2		ME:SK_MEL_2 11:70803936-74754489,OV:OVCAR_3 11:73255955-75102625	FALSE	FALSE
	NEU3	10825	sialidase 3 (membrane sialidase)	11	74699949	74718743	11q13.4	0.461966	0.0002027	1	MEN1	10121183	0	2		ME:SK_MEL_2 11:70803936-74754489,OV:OVCAR_3 11:73255955-75102625	FALSE	FALSE
	GRIA4	2893	glutamate receptor, ionotrophic, AMPA 4	11	105480799	105852819	11q22.3	0.0870874	0.508199	1	ATM	2240739	0	2		CNS:SF_268 11:103368043-105837661,LC:EKVX 11:105572485-106201106	FALSE	FALSE
	FAM111B	374393	family with sequence similarity 111, member B	11	58874657	58894888	11q12.1	0.238946	0.0659641	1	MEN1	5676097	0	2		LE:RPMI_8226 11:58805601-60688506,LC:NCI_H322M 11:57633661-60123634	FALSE	FALSE
	FAM111A	63901	family with sequence similarity 111, member A	11	58910317	58922511	11q12.1	0.452866	0.000279903	1	MEN1	5648474	0	2		LE:RPMI_8226 11:58805601-60688506,LC:NCI_H322M 11:57633661-60123634	FALSE	FALSE
	MPEG1	219972	macrophage expressed 1	11	58975982	58980494	11q12.1	-0.0312632	0.814165	1	MEN1	5590491	0	2		LE:RPMI_8226 11:58805601-60688506,LC:NCI_H322M 11:57633661-60123634	FALSE	FALSE
	DTX4	23220	deltex homolog 4 (Drosophila)	11	58939811	58976060	11q12.1	0.104761	0.425681	1	MEN1	5594925	0	2		LE:RPMI_8226 11:58805601-60688506,LC:NCI_H322M 11:57633661-60123634	FALSE	FALSE
	OR5A2	219981	olfactory receptor, family 5, subfamily A, member 2	11	59189451	59190426	11q12.1	0.178448	0.176299	1	MEN1	5380559	0	2		LE:RPMI_8226 11:58805601-60688506,LC:NCI_H322M 11:57633661-60123634	FALSE	FALSE
	OR4D10	390197	olfactory receptor, family 4, subfamily D, member 10	11	59244902	59245838	11q12.1	0.0755787	0.569407	1	MEN1	5325147	0	2		LE:RPMI_8226 11:58805601-60688506,LC:NCI_H322M 11:57633661-60123634	FALSE	FALSE
	PATL1	219988	protein associated with topoisomerase II homolog 1 (yeast)	11	59404191	59436511	11q12.1	0.611363	2.1186e-07	0.00345268	MEN1	5134474	0	2		LE:RPMI_8226 11:58805601-60688506,LC:NCI_H322M 11:57633661-60123634	FALSE	FALSE
	OR10V1	390201	olfactory receptor, family 10, subfamily V, member 1	11	59480388	59481318	11q12.1	0.175054	0.184804	1	MEN1	5089667	0	2		LE:RPMI_8226 11:58805601-60688506,LC:NCI_H322M 11:57633661-60123634	FALSE	FALSE
	TCN1	6947	transcobalamin I (vitamin B12 binding protein, R binder family)	11	59620280	59634041	11q12.1	-0.185284	0.160039	1	MEN1	4936944	0	2		LE:RPMI_8226 11:58805601-60688506,LC:NCI_H322M 11:57633661-60123634	FALSE	FALSE
	STX3	6809	syntaxin 3	11	59522531	59573355	11q12.1	0.306474	0.0172365	1	MEN1	4997630	0	2		LE:RPMI_8226 11:58805601-60688506,LC:NCI_H322M 11:57633661-60123634	FALSE	FALSE
	GIF	2694	gastric intrinsic factor (vitamin B synthesis)	11	59596745	59612974	11q12.1	-0.0339954	0.798251	1	MEN1	4958011	0	2		LE:RPMI_8226 11:58805601-60688506,LC:NCI_H322M 11:57633661-60123634	FALSE	FALSE
	MRPL16	54948	mitochondrial ribosomal protein L16	11	59573607	59578345	11q12.1	0.640287	3.60995e-08	0.000605641	MEN1	4992640	0	2		LE:RPMI_8226 11:58805601-60688506,LC:NCI_H322M 11:57633661-60123634	FALSE	FALSE
	MS4A3	932	membrane-spanning 4-domains, subfamily A, member 3 (hematopoietic cell-specific)	11	59824100	59838588	11q12.1	0.0797287	0.544814	1	MEN1	4732397	0	2		LE:RPMI_8226 11:58805601-60688506,LC:NCI_H322M 11:57633661-60123634	FALSE	FALSE
	MS4A2	2206	membrane-spanning 4-domains, subfamily A, member 2 (Fc fragment of IgE, high affinity I, receptor for; beta polypeptide)	11	59856136	59865940	11q12.1	0.150429	0.255443	1	MEN1	4705045	0	2		LE:RPMI_8226 11:58805601-60688506,LC:NCI_H322M 11:57633661-60123634	FALSE	FALSE
	PLAC1L	219990	placenta-specific 1-like	11	59807747	59815516	11q12.1	0.198539	0.131702	1	MEN1	4755469	0	2		LE:RPMI_8226 11:58805601-60688506,LC:NCI_H322M 11:57633661-60123634	FALSE	FALSE
	MS4A6A	64231	membrane-spanning 4-domains, subfamily A, member 6A	11	59939079	59952139	11q12.2	-0.124111	0.344764	1	MEN1	4618846	0	2		LE:RPMI_8226 11:58805601-60688506,LC:NCI_H322M 11:57633661-60123634	FALSE	FALSE
	MS4A4A	51338	membrane-spanning 4-domains, subfamily A, member 4	11	60048013	60076445	11q12.2	-0.0551198	0.675733	1	MEN1	4494540	0	2		LE:RPMI_8226 11:58805601-60688506,LC:NCI_H322M 11:57633661-60123634	FALSE	FALSE
	MS4A6E	245802	membrane-spanning 4-domains, subfamily A, member 6E	11	60102354	60108441	11q12.2	-0.101666	0.439555	1	MEN1	4462544	0	2		LE:RPMI_8226 11:58805601-60688506,LC:NCI_H322M 11:57633661-60123634	FALSE	FALSE
	FLRT1	23769	fibronectin leucine rich transmembrane protein 1	11	63871361	63886645	11q13.1	0.124026	0.345096	1	MEN1	684340	0	2		LC:HOP_62 11:62698979-64133652,LC:NCI_H322M 11:63875270-63962068	FALSE	FALSE
	RHOD	29984	ras homolog gene family, member D	11	66824288	66839488	11q13.2	0.415717	0.000955637	1	MEN1	2245522	0	2		CNS:SF_295 11:65763081-68599682,LE:RPMI_8226 11:66649574-67173417	FALSE	FALSE
	C11orf86	254439	chromosome 11 open reading frame 86	11	66742753	66744479	11q13.2	0.207613	0.111445	1	MEN1	2163987	0	2		CNS:SF_295 11:65763081-68599682,LE:RPMI_8226 11:66649574-67173417	FALSE	FALSE
	SYT12	91683	synaptotagmin XII	11	66790189	66818334	11q13.2	0.417328	0.000908672	1	MEN1	2211423	0	2		CNS:SF_295 11:65763081-68599682,LE:RPMI_8226 11:66649574-67173417	FALSE	FALSE
	ANKRD13D	338692	ankyrin repeat domain 13 family, member D	11	67056761	67069955	11q13.2	0.69908	5.22212e-10	9.18414e-06	MEN1	2477995	0	2		CNS:SF_295 11:65763081-68599682,LE:RPMI_8226 11:66649574-67173417	FALSE	FALSE
	SSH3	54961	slingshot homolog 3 (Drosophila)	11	67070918	67080078	11q13.2	0.528821	1.40204e-05	0.206662	MEN1	2492152	0	2		CNS:SF_295 11:65763081-68599682,LE:RPMI_8226 11:66649574-67173417	FALSE	FALSE
	ADRBK1	156	adrenergic, beta, receptor kinase 1	11	67033904	67054029	11q13.2	0.404785	0.00147282	1	MEN1	2455138	0	2		CNS:SF_295 11:65763081-68599682,LE:RPMI_8226 11:66649574-67173417	FALSE	FALSE
	POLD4	57804	polymerase (DNA-directed), delta 4	11	67118235	67121067	11q13.2	0.401375	0.00148071	1	MEN1	2539469	0	2		CNS:SF_295 11:65763081-68599682,LE:RPMI_8226 11:66649574-67173417	FALSE	FALSE
	CLCF1	23529	cardiotrophin-like cytokine factor 1	11	67131638	67141648	11q13.2	0.409804	0.00114741	1	MEN1	2552872	0	2		CNS:SF_295 11:65763081-68599682,LE:RPMI_8226 11:66649574-67173417	FALSE	FALSE
	PPP1CA	5499	protein phosphatase 1, catalytic subunit, alpha isozyme	11	67165651	67169376	11q13.2	0.863649	6.68713e-19	1.23618e-14	MEN1	2586885	0	2		CNS:SF_295 11:65763081-68599682,LE:RPMI_8226 11:66649574-67173417	FALSE	FALSE
	RAD9A	5883	RAD9 homolog A (S. pombe)	11	67159422	67165883	11q13.2	0.644666	2.71694e-08	0.000457939	MEN1	2580656	0	2		CNS:SF_295 11:65763081-68599682,LE:RPMI_8226 11:66649574-67173417	FALSE	FALSE
	TBC1D10C	374403	TBC1 domain family, member 10C	11	67171383	67177561	11q13.2	0.0736074	0.576212	1	MEN1	2592617	0	2		CNS:SF_295 11:65763081-68599682,LE:RPMI_8226 11:66649574-67173417	FALSE	FALSE
	DHCR7	1717	7-dehydrocholesterol reductase	11	71145456	71159477	11q13.4	0.415197	0.000971265	1	MEN1	6566690	2	2	ME:SK_MEL_28 11:70870097-71165742,ME:SK_MEL_5 11:68544562-72066913	ME:SK_MEL_2 11:70803936-74754489,LC:EKVX 11:70339364-72091902	FALSE	FALSE
	ARAP1	116985	ArfGAP with RhoGAP domain, ankyrin repeat and PH domain 1	11	72396113	72463434	11q13.4	0.605882	2.90476e-07	0.004706	MEN1	7817347	0	2		ME:SK_MEL_2 11:70803936-74754489,LC:HOP_62 11:71254228-73014538	FALSE	FALSE
	ATG16L2	89849	ATG16 autophagy related 16-like 2 (S. cerevisiae)	11	72525450	72540680	11q13.4	0.407057	0.00124774	1	MEN1	7946684	1	2	OV:OVCAR_3 11:72493282-73214167	ME:SK_MEL_2 11:70803936-74754489,LC:HOP_62 11:71254228-73014538	FALSE	FALSE
	P2RY2	5029	purinergic receptor P2Y, G-protein coupled, 2	11	72929342	72953472	11q13.4	0.416048	0.00094581	1	MEN1	8350576	1	2	OV:OVCAR_3 11:72493282-73214167	ME:SK_MEL_2 11:70803936-74754489,LC:HOP_62 11:71254228-73014538	FALSE	FALSE
	PLEKHB1	58473	pleckstrin homology domain containing, family B (evectins) member 1	11	73357222	73373864	11q13.4	-0.00836479	0.949423	1	MEN1	8778456	1	2	LC:HOP_62 11:73022691-73449177	ME:SK_MEL_2 11:70803936-74754489,OV:OVCAR_3 11:73255955-75102625	FALSE	FALSE
	PAAF1	80227	proteasomal ATPase-associated factor 1	11	73587743	73638781	11q13.4	0.604506	3.14142e-07	0.00507842	MEN1	9008977	0	2		ME:SK_MEL_2 11:70803936-74754489,OV:OVCAR_3 11:73255955-75102625	FALSE	FALSE
	UCP3	7352	uncoupling protein 3 (mitochondrial, proton carrier)	11	73711325	73720282	11q13.4	0.573318	1.68626e-06	0.0263192	MEN1	9132559	0	2		ME:SK_MEL_2 11:70803936-74754489,OV:OVCAR_3 11:73255955-75102625	FALSE	FALSE
	UCP2	7351	uncoupling protein 2 (mitochondrial, proton carrier)	11	73685715	73693889	11q13.4	0.349852	0.0061418	1	MEN1	9106949	0	2		ME:SK_MEL_2 11:70803936-74754489,OV:OVCAR_3 11:73255955-75102625	FALSE	FALSE
	P4HA3	283208	prolyl 4-hydroxylase, alpha polypeptide III	11	73977701	74022699	11q13.4	0.267089	0.0391139	1	MEN1	9398935	0	2		ME:SK_MEL_2 11:70803936-74754489,OV:OVCAR_3 11:73255955-75102625	FALSE	FALSE
	KCNE3	10008	potassium voltage-gated channel, Isk-related family, member 3	11	74165885	74178600	11q13.4	0.0642128	0.625953	1	MEN1	9587119	0	2		ME:SK_MEL_2 11:70803936-74754489,OV:OVCAR_3 11:73255955-75102625	FALSE	FALSE
	LIPT2	387787	lipoyl(octanoyl) transferase 2 (putative)	11	74202922	74204755	11q13.4	0.512972	2.78002e-05	0.401157	MEN1	9624156	0	2		ME:SK_MEL_2 11:70803936-74754489,OV:OVCAR_3 11:73255955-75102625	FALSE	FALSE
	CHRDL2	25884	chordin-like 2	11	74407473	74442186	11q13.4	0.474002	0.000130424	1	MEN1	9828707	0	2		ME:SK_MEL_2 11:70803936-74754489,OV:OVCAR_3 11:73255955-75102625	FALSE	FALSE
	RNF169	254225	ring finger protein 169	11	74459912	74553458	11q13.4	0.752235	4.24587e-12	7.69139e-08	MEN1	9881146	0	2		ME:SK_MEL_2 11:70803936-74754489,OV:OVCAR_3 11:73255955-75102625	FALSE	FALSE
	SPCS2	9789	signal peptidase complex subunit 2 homolog (S. cerevisiae)	11	74660291	74690076	11q13.4	0.684772	2.21714e-09	3.85028e-05	MEN1	10081525	0	2		ME:SK_MEL_2 11:70803936-74754489,OV:OVCAR_3 11:73255955-75102625	FALSE	FALSE
	CCDC90B	60492	coiled-coil domain containing 90B	11	82972501	82997377	11q14.1	0.728612	4.1401e-11	7.41907e-07	MEN1	18393735	1	2	OV:NCI_ADR_RES 11:81856929-83602399	LC:EKVX 11:82258473-83807445,LC:NCI_H322M 11:82977794-83052144	FALSE	FALSE
	OR7E2P	8587	olfactory receptor, family 7, subfamily E, member 2 pseudogene	11	86567972	86568996	11q14.2	0.14353	0.278136	1	ATM	21524562	0	2		LC:NCI_H322M 11:86552571-86730814,PR:PC_3 11:85659850-86572604	FALSE	FALSE
	AASDHPPT	60496	aminoadipate-semialdehyde dehydrogenase-phosphopantetheinyl transferase	11	105948291	105969419	11q22.3	0.193925	0.13763	1	ATM	2124139	0	2		CNS:SF_268 11:105896432-106321414,LC:EKVX 11:105572485-106201106	FALSE	FALSE
	KBTBD3	143879	kelch repeat and BTB (POZ) domain containing 3	11	105921824	105948465	11q22.3	0.407447	0.00123304	1	ATM	2145093	0	2		CNS:SF_268 11:105896432-106321414,LC:EKVX 11:105572485-106201106	FALSE	FALSE
	FAR2	55711	fatty acyl CoA reductase 2	12	29301935	29488549	12p11.22	0.0554254	0.674036	1	ING4	22529627	0	2		OV:OVCAR_8 12:29323529-29689007,OV:NCI_ADR_RES 12:29310894-29691035	FALSE	FALSE
	TMTC1	83857	transmembrane and tetratricopeptide repeat containing 1	12	29653745	29937692	12p11.22	0.140302	0.284975	1	ING4	22881437	0	2		OV:OVCAR_8 12:29323529-29689007,OV:NCI_ADR_RES 12:29310894-29691035	FALSE	FALSE
	OVCH1	341350	ovochymase 1	12	29580488	29650619	12p11.22	-0.0637795	0.631294	1	ING4	22808180	0	2		OV:OVCAR_8 12:29323529-29689007,OV:NCI_ADR_RES 12:29310894-29691035	FALSE	FALSE
	OSBPL8	114882	oxysterol binding protein-like 8	12	76745577	76953589	12q21.2	0.315941	0.0139271	1	MDM2	7506257	0	2		ME:UACC_257 12:75961212-78561703,RE:UO_31 12:75884403-77272580	FALSE	FALSE
	ZDHHC17	23390	zinc finger, DHHC-type containing 17	12	77157853	77247474	12q21.2	-0.030631	0.816282	1	MDM2	7918533	0	2		ME:UACC_257 12:75961212-78561703,RE:UO_31 12:75884403-77272580	FALSE	FALSE
	PPP1R12A	4659	protein phosphatase 1, regulatory (inhibitor) subunit 12A	12	80167342	80329235	12q21.2:12q21.31	0.633459	5.57327e-08	0.000929008	MDM2	10928022	0	2		CNS:U251 12:79894422-80311366,ME:UACC_257 12:78683757-82762885	FALSE	FALSE
	TRPV4	59341	transient receptor potential cation channel, subfamily V, member 4	12	110220891	110271212	12q24.11	0.202411	0.120904	1	HNF1A	11145336	0	2		ME:MDA_MB_435 12:110262454-110351370,ME:MDA_N 12:110238562-110351370	FALSE	FALSE
	ERGIC2	51290	ERGIC and golgi 2	12	29493578	29534143	12p11.22	0.824592	5.62376e-16	1.03685e-11	ING4	22721270	0	2		OV:OVCAR_8 12:29323529-29689007,OV:NCI_ADR_RES 12:29310894-29691035	FALSE	FALSE
	BBS10	79738	Bardet-Biedl syndrome 10	12	76738265	76742222	12q21.2	0.651228	1.75946e-08	0.000298281	MDM2	7498945	0	2		ME:UACC_257 12:75961212-78561703,RE:UO_31 12:75884403-77272580	FALSE	FALSE
	CSRP2	1466	cysteine and glycine-rich protein 2	12	77252495	77272799	12q21.2	-0.181049	0.166245	1	MDM2	8013175	0	2		ME:UACC_257 12:75961212-78561703,RE:UO_31 12:75884403-77272580	FALSE	FALSE
	PAWR	5074	PRKC, apoptosis, WT1, regulator	12	79985744	80084790	12q21.2	0.396134	0.00172944	1	MDM2	10746424	0	2		CNS:U251 12:79894422-80311366,ME:UACC_257 12:78683757-82762885	FALSE	FALSE
	GLTP	51228	glycolipid transfer protein	12	110288747	110318293	12q24.11	0.508674	3.32773e-05	0.477929	HNF1A	11098255	0	2		ME:MDA_MB_435 12:110262454-110351370,ME:MDA_N 12:110238562-110351370	FALSE	FALSE
	TCHP	84260	trichoplein, keratin filament binding	12	110338078	110355874	12q24.11	0.58257	1.04312e-06	0.0164396	HNF1A	11060674	0	2		ME:MDA_MB_435 12:110262454-110351370,ME:MDA_N 12:110238562-110351370	FALSE	FALSE
	SAV1	60485	salvador homolog 1 (Drosophila)	14	51100297	51135071	14q22.1	0.770249	6.25663e-13	1.14077e-08			0	2		RE:786_0 14:50978170-51115016,RE:ACHN 14:51110769-51235038	FALSE	FALSE
	SPATA7	55812	spermatogenesis associated 7	14	88851987	88904804	14q31.3	0.514694	2.58494e-05	0.374041			0	2		PR:DU_145 14:88781733-88906754,PR:DU_145(DTP) 14:88782647-88902025	FALSE	FALSE
	KCNK10	54207	potassium channel, subfamily K, member 10	14	88646451	88793256	14q31.3	-0.10179	0.438997	1			0	2		PR:DU_145 14:88781733-88906754,PR:DU_145(DTP) 14:88782647-88902025	FALSE	FALSE
	SNRPN	6638	small nuclear ribonucleoprotein polypeptide N	15	25068793	25223729	15q11.2	0.315391	0.0141034	1	MGA	16728880	0	2		LE:RPMI_8226 15:22651956-25300842,LC:A549 15:24980354-26685982	FALSE	FALSE
	LOC100128714	100128714	hypothetical LOC100128714	15	26147506	26298267	15q12	-0.260977	0.045884	1	MGA	15654342	0	2		LC:A549 15:24980354-26685982,LC:HOP_62 15:26125851-26809338	FALSE	FALSE
	MAPKBP1	23005	mitogen-activated protein kinase binding protein 1	15	42066631	42120053	15q15.1	0.300208	0.0197788	1	MGA	4490	0	2		OV:OVCAR_8 15:41865778-42156798,OV:SK_OV_3 15:41270696-43011344	FALSE	FALSE
	PAR5	8123	Prader-Willi/Angelman syndrome-5	15	25230006	25233379	15q11.2	-0.126583	0.339401	1	MGA	16719230	0	2		LE:RPMI_8226 15:22651956-25300842,LC:A549 15:24980354-26685982	FALSE	FALSE
	TYRO3	7301	TYRO3 protein tyrosine kinase	15	41851219	41871536	15q15.1	0.272339	0.0352803	1	MGA	81073	0	2		OV:OVCAR_8 15:41865778-42156798,OV:SK_OV_3 15:41270696-43011344	FALSE	FALSE
	MGA	23269	MAX gene associated	15	41952609	42062141	15q15.1	0.405507	0.00130779	1	MGA	0	0	2		OV:OVCAR_8 15:41865778-42156798,OV:SK_OV_3 15:41270696-43011344	FALSE	FALSE
	JMJD7-PLA2G4B	8681	JMJD7-PLA2G4B readthrough	15	42120282	42140346	15q15.1	0.651001	2.37302e-08	0.000400661	MGA	58141	0	2		OV:OVCAR_8 15:41865778-42156798,OV:SK_OV_3 15:41270696-43011344	FALSE	FALSE
	SPTBN5	51332	spectrin, beta, non-erythrocytic 5	15	42140343	42186275	15q15.1	-0.0659619	0.619638	1	MGA	78202	0	2		OV:OVCAR_8 15:41865778-42156798,OV:SK_OV_3 15:41270696-43011344	FALSE	FALSE
	SPG11	80208	spastic paraplegia 11 (autosomal recessive)	15	44854893	44955876	15q21.1	0.802121	1.32889e-14	2.4409e-10	B2M	47808	1	2	LC:NCI_H226 15:44398962-46655814	CO:HCC_2998 15:44850710-44987781,OV:NCI_ADR_RES 15:44922806-45007215	FALSE	FALSE
	PATL2	197135	protein associated with topoisomerase II homolog 2 (yeast)	15	44957929	44969086	15q21.1	0.399169	0.00158122	1	B2M	34598	1	2	LC:NCI_H226 15:44398962-46655814	CO:HCC_2998 15:44850710-44987781,OV:NCI_ADR_RES 15:44922806-45007215	FALSE	FALSE
	CDH13	1012	cadherin 13, H-cadherin (heart)	16	82660398	83830215	16q23.3	0.135408	0.302277	1	ADAMTS18	5191387	0	2		CO:COLO205 16:83009504-83288225,CO:SW_620 16:82864942-83230767	FALSE	FALSE
	OTOA	146183	otoancorin	16	21689834	21772050	16p12.2	0.235501	0.0725647	1	SOCS1	10339795	0	2		CNS:SF_295 16:21586024-21790106,CO:HCT_116 16:21589249-21790106	FALSE	FALSE
	METTL9	51108	methyltransferase like 9	16	21610855	21668792	16p12.2	0.320196	0.0126278	1	SOCS1	10260816	0	2		CNS:SF_295 16:21586024-21790106,CO:HCT_116 16:21589249-21790106	FALSE	FALSE
	TOM1L2	146691	target of myb1-like 2 (chicken)	17	17746821	17875784	17p11.2	0.340115	0.00784015	1	MAP2K4	5699770	1	2	LE:RPMI_8226 17:17601399-18636170	PR:DU_145 17:15751600-18022589,PR:RC01 17:15799276-17999828	FALSE	FALSE
	RAI1	10743	retinoic acid induced 1	17	17584786	17714765	17p11.2	0.529328	1.37088e-05	0.202191	MAP2K4	5537735	0	2		PR:DU_145 17:15751600-18022589,PR:RC01 17:15799276-17999828	FALSE	FALSE
	KRT26	353288	keratin 26	17	38922489	38928411	17q21.2	0.110885	0.403108	1	CDK12	1231689	0	2		ME:SK_MEL_2 17:38524833-38937316,OV:OVCAR_5 17:38851921-40519030	FALSE	FALSE
	STAT5B	6777	signal transducer and activator of transcription 5B	17	40351194	40428424	17q21.2	0.526716	1.53854e-05	0.226303	BRCA1	767887	0	2		OV:OVCAR_5 17:38851921-40519030,PR:PC_3 17:40260025-40643071	FALSE	FALSE
	STAT3	6774	signal transducer and activator of transcription 3 (acute-phase response factor)	17	40465342	40540513	17q21.2	0.640298	3.60742e-08	0.000605289	BRCA1	655798	0	2		OV:OVCAR_5 17:38851921-40519030,PR:PC_3 17:40260025-40643071	FALSE	FALSE
	CDC27	996	cell division cycle 27 homolog (S. cerevisiae)	17	45195310	45266665	17q21.32	0.695755	6.81574e-10	1.19562e-05	BRCA1	3917810	0	2		ME:MDA_MB_435 17:45079259-45705882,ME:MDA_N 17:45117254-45705882	FALSE	FALSE
	ITGB3	3690	integrin, beta 3 (platelet glycoprotein IIIa, antigen CD61)	17	45331207	45390077	17q21.32	-0.177436	0.175007	1	BRCA1	4053707	0	2		ME:MDA_MB_435 17:45079259-45705882,ME:MDA_N 17:45117254-45705882	FALSE	FALSE
	NPEPPS	9520	aminopeptidase puromycin sensitive	17	45608443	45700642	17q21.32	0.608416	2.5123e-07	0.00408299	BRCA1	4330943	0	2		ME:MDA_MB_435 17:45079259-45705882,ME:MDA_N 17:45117254-45705882	FALSE	FALSE
	SAT2	112483	spermidine/spermine N1-acetyltransferase family member 2	17	7529555	7531194	17p13.1	0.641832	3.26719e-08	0.000549149	TP53	40525	0	2		LE:HL_60 17:7496616-7577430,RE:TK_10 17:7530305-8098510	FALSE	FALSE
	ATP1B2	482	ATPase, Na+/K+ transporting, beta 2 polypeptide	17	7554253	7561089	17p13.1	-0.0277931	0.833046	1	TP53	10630	0	2		LE:HL_60 17:7496616-7577430,RE:TK_10 17:7530305-8098510	FALSE	FALSE
	TP53	7157	tumor protein p53	17	7571719	7590868	17p13.1	0.553572	4.48214e-06	0.068393	TP53	0	0	2		LE:HL_60 17:7496616-7577430,RE:TK_10 17:7530305-8098510	FALSE	FALSE
	SHBG	6462	sex hormone-binding globulin	17	7517381	7536700	17p13.1	0.00566287	0.966047	1	TP53	35019	0	2		LE:HL_60 17:7496616-7577430,RE:TK_10 17:7530305-8098510	FALSE	FALSE
	SMCR5	140771	Smith-Magenis syndrome chromosome region, candidate 5 (non-protein coding)	17	17679999	17682843	17p11.2	0.26272	0.044402	1	MAP2K4	5632948	1	2	LE:RPMI_8226 17:17601399-18636170	PR:DU_145 17:15751600-18022589,PR:RC01 17:15799276-17999828	FALSE	FALSE
	SREBF1	6720	sterol regulatory element binding transcription factor 1	17	17714662	17740325	17p11.2	0.397872	0.00164307	1	MAP2K4	5667611	1	2	LE:RPMI_8226 17:17601399-18636170	PR:DU_145 17:15751600-18022589,PR:RC01 17:15799276-17999828	FALSE	FALSE
	LRRC48	83450	leucine rich repeat containing 48	17	17876126	17920189	17p11.2	0.472438	0.000158083	1	MAP2K4	5829075	1	2	LE:RPMI_8226 17:17601399-18636170	PR:DU_145 17:15751600-18022589,PR:RC01 17:15799276-17999828	FALSE	FALSE
	ATPAF2	91647	ATP synthase mitochondrial F1 complex assembly factor 2	17	17921333	17942480	17p11.2	0.65643	1.23743e-08	0.000210834	MAP2K4	5874282	1	2	LE:RPMI_8226 17:17601399-18636170	PR:DU_145 17:15751600-18022589,PR:RC01 17:15799276-17999828	FALSE	FALSE
	DRG2	1819	developmentally regulated GTP binding protein 2	17	17991180	18011299	17p11.2	0.801291	1.48207e-14	2.72108e-10	MAP2K4	5944129	1	2	LE:RPMI_8226 17:17601399-18636170	PR:DU_145 17:15751600-18022589,PR:RC01 17:15799276-17999828	FALSE	FALSE
	KRT24	192666	keratin 24	17	38854242	38860002	17q21.2	-0.0521265	0.694991	1	CDK12	1163442	0	2		ME:SK_MEL_2 17:38524833-38937316,OV:OVCAR_5 17:38851921-40519030	FALSE	FALSE
	KRT25	147183	keratin 25	17	38904272	38911584	17q21.2	0.0435267	0.743414	1	CDK12	1213472	0	2		ME:SK_MEL_2 17:38524833-38937316,OV:OVCAR_5 17:38851921-40519030	FALSE	FALSE
	KRT27	342574	keratin 27	17	38933059	38938786	17q21.2	-0.0735085	0.576727	1	CDK12	1242259	0	2		ME:SK_MEL_2 17:38524833-38937316,OV:OVCAR_5 17:38851921-40519030	FALSE	FALSE
	HCRT	3060	hypocretin (orexin) neuropeptide precursor	17	40336077	40337470	17q21.2	0.1971	0.14168	1	BRCA1	858841	0	2		OV:OVCAR_5 17:38851921-40519030,PR:PC_3 17:40260025-40643071	FALSE	FALSE
	RAB5C	5878	RAB5C, member RAS oncogene family	17	40276993	40307062	17q21.2	0.868282	2.6235e-19	4.85033e-15	BRCA1	889249	0	2		OV:OVCAR_5 17:38851921-40519030,PR:PC_3 17:40260025-40643071	FALSE	FALSE
	GHDC	84514	GH3 domain containing	17	40341104	40346550	17q21.2	0.302894	0.0186523	1	BRCA1	849761	0	2		OV:OVCAR_5 17:38851921-40519030,PR:PC_3 17:40260025-40643071	FALSE	FALSE
	KAT2A	2648	K(lysine) acetyltransferase 2A	17	40265128	40273382	17q21.2	0.764355	1.19274e-12	2.17079e-08	BRCA1	922929	0	2		OV:OVCAR_5 17:38851921-40519030,PR:PC_3 17:40260025-40643071	FALSE	FALSE
	HSPB9	94086	heat shock protein, alpha-crystallin-related, B9	17	40274755	40275371	17q21.2	0.0638943	0.630678	1	BRCA1	920940	0	2		OV:OVCAR_5 17:38851921-40519030,PR:PC_3 17:40260025-40643071	FALSE	FALSE
	KCNH4	23415	potassium voltage-gated channel, subfamily H (eag-related), member 4	17	40308909	40333296	17q21.2	0.137747	0.298162	1	BRCA1	863015	0	2		OV:OVCAR_5 17:38851921-40519030,PR:PC_3 17:40260025-40643071	FALSE	FALSE
	DHX58	79132	DEXH (Asp-Glu-X-His) box polypeptide 58	17	40253421	40264751	17q21.2	0.218237	0.0939033	1	BRCA1	931560	0	2		OV:OVCAR_5 17:38851921-40519030,PR:PC_3 17:40260025-40643071	FALSE	FALSE
	STAT5A	6776	signal transducer and activator of transcription 5A	17	40439564	40463960	17q21.2	0.093743	0.476201	1	BRCA1	732351	0	2		OV:OVCAR_5 17:38851921-40519030,PR:PC_3 17:40260025-40643071	FALSE	FALSE
	MYL4	4635	myosin, light chain 4, alkali; atrial, embryonic	17	45286427	45301045	17q21.32	0.169526	0.195349	1	BRCA1	4008927	0	2		ME:MDA_MB_435 17:45079259-45705882,ME:MDA_N 17:45117254-45705882	FALSE	FALSE
	CDC25A	993	cell division cycle 25 homolog A (S. pombe)	3	48198667	48229801	3p21.31	0.436322	0.000492049	1	SETD2	993200	2	0	LC:NCI_H226 3:46052913-50096583,OV:SK_OV_3 3:48185992-48238017		FALSE	FALSE
	GREB1L	80000	growth regulation by estrogen in breast cancer-like	18	18822202	19102791	18q11.1:18q11.2	0.0374681	0.776241	1	SMAD4	29453791	0	2		OV:OVCAR_3 18:18630730-20390237,RE:SN12C 18:15102421-19881996	FALSE	FALSE
	NOL4	8715	nucleolar protein 4	18	31431063	31803515	18q12.1	-0.060142	0.648051	1	SMAD4	16753067	0	2		CO:KM12 18:29674470-32315091,OV:OVCAR_3 18:30673052-33302885	FALSE	FALSE
	ROCK1	6093	Rho-associated, coiled-coil containing protein kinase 1	18	18529702	18691812	18q11.1	0.499821	4.78337e-05	0.678808	SMAD4	29864770	0	2		OV:OVCAR_3 18:18630730-20390237,RE:SN12C 18:15102421-19881996	FALSE	FALSE
	ABHD3	171586	abhydrolase domain containing 3	18	19230857	19284766	18q11.2	0.445008	0.000367222	1	SMAD4	29271816	0	2		OV:OVCAR_3 18:18630730-20390237,RE:SN12C 18:15102421-19881996	FALSE	FALSE
	ESCO1	114799	establishment of cohesion 1 homolog 1 (S. cerevisiae)	18	19109261	19180693	18q11.2	0.510371	3.10047e-05	0.446189	SMAD4	29375889	0	2		OV:OVCAR_3 18:18630730-20390237,RE:SN12C 18:15102421-19881996	FALSE	FALSE
	MIB1	57534	mindbomb homolog 1 (Drosophila)	18	19321544	19450912	18q11.2	0.696969	6.18639e-10	1.08602e-05	SMAD4	29105670	0	2		OV:OVCAR_3 18:18630730-20390237,RE:SN12C 18:15102421-19881996	FALSE	FALSE
	KLHL14	57565	kelch-like 14 (Drosophila)	18	30252633	30352974	18q12.1	0.25774	0.0467924	1	SMAD4	18203608	1	2	OV:OVCAR_3 18:30184404-30647452	CO:KM12 18:29674470-32315091,RE:RXF_393 18:29942532-31009928	FALSE	FALSE
	ASXL3	80816	additional sex combs like 3 (Drosophila)	18	31158540	31327399	18q12.1	0.197238	0.130905	1	SMAD4	17229183	0	2		CO:KM12 18:29674470-32315091,OV:OVCAR_3 18:30673052-33302885	FALSE	FALSE
	DTNA	1837	dystrobrevin, alpha	18	32073253	32471808	18q12.1	0.0592151	0.653126	1	SMAD4	16084774	0	2		CO:KM12 18:29674470-32315091,OV:OVCAR_3 18:30673052-33302885	FALSE	FALSE
	SNRPD1	6632	small nuclear ribonucleoprotein D1 polypeptide 16kDa	18	19192259	19210208	18q11.2	0.590398	6.86663e-07	0.0109207	SMAD4	29346374	0	2		OV:OVCAR_3 18:18630730-20390237,RE:SN12C 18:15102421-19881996	FALSE	FALSE
	GATA6	2627	GATA binding protein 6	18	19749403	19782491	18q11.2	0.160318	0.221091	1	SMAD4	28774091	0	2		OV:OVCAR_3 18:18630730-20390237,RE:SN12C 18:15102421-19881996	FALSE	FALSE
	WBP11P1	441818	WW domain binding protein 11 pseudogene 1	18	30091625	30094597	18q12.1	0.0398532	0.764415	1	SMAD4	18461985	0	2		CO:KM12 18:29674470-32315091,RE:RXF_393 18:29942532-31009928	FALSE	FALSE
	PSG11	5680	pregnancy specific beta-1-glycoprotein 11	19	43511808	43530631	19q13.31	0.127192	0.337063	1	CIC	711859	0	2		LE:CCRF_CEM 19:43363622-43582875,RE:TK_10 19:43334956-43547904	FALSE	FALSE
	PSG1	5669	pregnancy specific beta-1-glycoprotein 1	19	43370612	43383871	19q13.2	0.0174253	0.895781	1	CIC	570663	0	2		LE:CCRF_CEM 19:43363622-43582875,RE:TK_10 19:43334956-43547904	FALSE	FALSE
	KIF16B	55614	kinesin family member 16B	20	16252748	16554079	20p12.1	0.310186	0.0158666	1	ASXL1	14392067	0	2		CNS:SNB_19 20:16373568-16436062,CNS:U251 20:16380784-16428861	FALSE	FALSE
	TSHZ2	128553	teashirt zinc finger homeobox 2	20	51588945	52111869	20q13.2	0.118602	0.366762	1	E2F1	19314735	0	2		BR:MCF7 20:50693718-52154779,ME:SK_MEL_28 20:50996821-52564424	FALSE	FALSE
	BAGE2	85319	B melanoma antigen family, member 2	21	11020841	11098925	21p11.1	0.0448205	0.736059	1	RUNX1	25061172	0	2		BR:MDA_MB_231 21:11040980-11114648,BR:BT_549 21:10966962-11098699	FALSE	FALSE
	BAGE3	85318	B melanoma antigen family, member 3	21	11020841	11098925	21p11.1	0.0756823	0.568877	1	RUNX1	25061172	0	2		BR:MDA_MB_231 21:11040980-11114648,BR:BT_549 21:10966962-11098699	FALSE	FALSE
	TXNRD2	10587	thioredoxin reductase 2	22	19863039	19929359	22q11.21	0.695381	7.02132e-10	1.23147e-05	SMARCB1	4199790	3	2	CO:HT29 22:19584787-21275284,ME:MALME_3M 22:18912528-21456518,OV:OVCAR_5 22:18642119-20043680	PR:DU_145(DTP) 22:18956602-20089647,PR:RC01 22:18954971-20042440	FALSE	FALSE
	SLC5A1	6523	solute carrier family 5 (sodium/glucose cotransporter), member 1	22	32439018	32509011	22q12.3	-0.0738397	0.575006	1	NF2	2344429	0	2		LC:HOP_62 22:31896795-33150044,OV:OVCAR_5 22:31574028-33030296	FALSE	FALSE
	MYH9	4627	myosin, heavy chain 9, non-muscle	22	36677322	36784063	22q12.3	0.189463	0.147094	1	EP300	4704550	0	2		ME:MDA_N 22:36675021-36741845,OV:OVCAR_5 22:36143059-37296223	FALSE	FALSE
	XKR3	150165	XK, Kell blood group complex subunit-related family, member 3	22	17264305	17302584	22q11.1	0.43095	0.000655975	1	SMARCB1	6826565	0	2		LE:K_562 22:17302010-18947036,ME:SK_MEL_2 22:17102551-18088166	FALSE	FALSE
	ATP6V1E1	529	ATPase, H+ transporting, lysosomal 31kDa, V1 subunit E1	22	18074902	18111588	22q11.21	0.624778	9.53534e-08	0.00157419	SMARCB1	6017561	0	2		LE:K_562 22:17302010-18947036,ME:SK_MEL_2 22:17102551-18088166	FALSE	FALSE
	CECR2	27443	cat eye syndrome chromosome region, candidate 2	22	17956627	18033845	22q11.21	0.0706326	0.595006	1	SMARCB1	6095304	0	2		LE:K_562 22:17302010-18947036,ME:SK_MEL_2 22:17102551-18088166	FALSE	FALSE
	GNB1L	54584	guanine nucleotide binding protein (G protein), beta polypeptide 1-like	22	19775933	19842462	22q11.21	0.539026	8.85712e-06	0.132467	SMARCB1	4286687	3	2	CO:HT29 22:19584787-21275284,ME:MALME_3M 22:18912528-21456518,OV:OVCAR_5 22:18642119-20043680	PR:DU_145(DTP) 22:18956602-20089647,PR:RC01 22:18954971-20042440	FALSE	FALSE
	DGCR9	25787	DiGeorge syndrome critical region gene 9	22	19005346	19007761	22q11.21	-0.254492	0.0517601	1	SMARCB1	5121388	3	2	ME:MALME_3M 22:18912528-21456518,LC:HOP_62 22:18638972-19787415,OV:OVCAR_5 22:18642119-20043680	PR:DU_145(DTP) 22:18956602-20089647,PR:RC01 22:18954971-20042440	FALSE	FALSE
	HIRA	7290	HIR histone cell cycle regulation defective homolog A (S. cerevisiae)	22	19318223	19419219	22q11.21	0.631033	6.48669e-08	0.00107815	SMARCB1	4709930	3	2	ME:MALME_3M 22:18912528-21456518,LC:HOP_62 22:18638972-19787415,OV:OVCAR_5 22:18642119-20043680	PR:DU_145(DTP) 22:18956602-20089647,PR:RC01 22:18954971-20042440	FALSE	FALSE
	GSC2	2928	goosecoid homeobox 2	22	19136503	19137796	22q11.21	0.0117008	0.929912	1	SMARCB1	4991353	3	2	ME:MALME_3M 22:18912528-21456518,LC:HOP_62 22:18638972-19787415,OV:OVCAR_5 22:18642119-20043680	PR:DU_145(DTP) 22:18956602-20089647,PR:RC01 22:18954971-20042440	FALSE	FALSE
	CLTCL1	8218	clathrin, heavy chain-like 1	22	19166986	19279239	22q11.21	0.226292	0.0821036	1	SMARCB1	4849910	3	2	ME:MALME_3M 22:18912528-21456518,LC:HOP_62 22:18638972-19787415,OV:OVCAR_5 22:18642119-20043680	PR:DU_145(DTP) 22:18956602-20089647,PR:RC01 22:18954971-20042440	FALSE	FALSE
	PI4KA	5297	phosphatidylinositol 4-kinase, catalytic, alpha	22	21061978	21213100	22q11.21	0.822298	7.92411e-16	1.46041e-11	SMARCB1	2916049	6	2	CO:HT29 22:19584787-21275284,ME:MALME_3M 22:18912528-21456518,OV:OVCAR_5 22:21024761-21421153,OV:SK_OV_3 22:20174705-21247870,PR:DU_145(DTP) 22:20100134-21957755,PR:RC01 22:20055495-21964328	ME:SK_MEL_2 22:20064512-22647780,LC:EKVX 22:20013881-22212684	FALSE	FALSE
	SNAP29	9342	synaptosomal-associated protein, 29kDa	22	21213291	21245501	22q11.21	0.695259	7.08962e-10	1.24331e-05	SMARCB1	2883648	6	2	CO:HT29 22:19584787-21275284,ME:MALME_3M 22:18912528-21456518,OV:OVCAR_5 22:21024761-21421153,OV:SK_OV_3 22:20174705-21247870,PR:DU_145(DTP) 22:20100134-21957755,PR:RC01 22:20055495-21964328	ME:SK_MEL_2 22:20064512-22647780,LC:EKVX 22:20013881-22212684	FALSE	FALSE
	PPM1F	9647	protein phosphatase, Mg2+/Mn2+ dependent, 1F	22	22273791	22307250	22q11.22	0.717611	1.10486e-10	1.96709e-06	SMARCB1	1821899	1	2	LC:EKVX 22:22219232-22496180	ME:SK_MEL_2 22:20064512-22647780,OV:OVCAR_5 22:21425728-23630559	FALSE	FALSE
	TTC28	23331	tetratricopeptide repeat domain 28	22	28374001	29075853	22q12.1	0.00359951	0.978224	1	NF2	923691	0	2		OV:OVCAR_5 22:28346315-28443508,RE:SN12C 22:28345155-28506232	FALSE	FALSE
	EIF4ENIF1	56478	eukaryotic translation initiation factor 4E nuclear import factor 1	22	31835344	31885874	22q12.2	0.635383	4.93669e-08	0.000824772	NF2	1740755	0	2		CO:SW_620 22:31657939-32183478,OV:OVCAR_5 22:31574028-33030296	FALSE	FALSE
	SYN3	8224	synapsin III	22	32908539	33454377	22q12.3	0.472548	0.000137677	1	NF2	2813950	0	2		LC:HOP_62 22:31896795-33150044,OV:OVCAR_5 22:33146617-34631719	FALSE	FALSE
	SLC5A4	6527	solute carrier family 5 (low affinity glucose cotransporter), member 4	22	32614462	32651318	22q12.3	0.169323	0.195892	1	NF2	2519873	0	2		LC:HOP_62 22:31896795-33150044,OV:OVCAR_5 22:31574028-33030296	FALSE	FALSE
	LARGE	9215	like-glycosyltransferase	22	33669061	34316416	22q12.3	0.427829	0.000650205	1	NF2	3574472	0	2		OV:OVCAR_5 22:33146617-34631719,RE:RXF_393 22:33898844-34131532	FALSE	FALSE
	HSFY1P1	27437	heat shock transcription factor, Y-linked 1 pseudogene 1	22	17308363	17310225	22q11.1	-0.128579	0.336093	1	SMARCB1	6818924	0	2		LE:K_562 22:17302010-18947036,ME:SK_MEL_2 22:17102551-18088166	FALSE	FALSE
	CECR7	100130418	cat eye syndrome chromosome region, candidate 7 (non-protein coding)	22	17517459	17539682	22q11.1	0.408177	0.00120593	1	SMARCB1	6589467	0	2		LE:K_562 22:17302010-18947036,ME:SK_MEL_2 22:17102551-18088166	FALSE	FALSE
	GAB4	128954	GRB2-associated binding protein family, member 4	22	17442826	17489112	22q11.1	-0.0161653	0.90328	1	SMARCB1	6640037	0	2		LE:K_562 22:17302010-18947036,ME:SK_MEL_2 22:17102551-18088166	FALSE	FALSE
	CECR5	27440	cat eye syndrome chromosome region, candidate 5	22	17618409	17646177	22q11.1	0.607194	2.69486e-07	0.00437269	SMARCB1	6482972	0	2		LE:K_562 22:17302010-18947036,ME:SK_MEL_2 22:17102551-18088166	FALSE	FALSE
	IL17RA	23765	interleukin 17 receptor A	22	17565848	17596584	22q11.1	0.554608	4.26447e-06	0.0651489	SMARCB1	6532565	0	2		LE:K_562 22:17302010-18947036,ME:SK_MEL_2 22:17102551-18088166	FALSE	FALSE
	CECR1	51816	cat eye syndrome chromosome region, candidate 1	22	17660191	17690779	22q11.1	0.0495766	0.706789	1	SMARCB1	6438370	0	2		LE:K_562 22:17302010-18947036,ME:SK_MEL_2 22:17102551-18088166	FALSE	FALSE
	SLC25A18	83733	solute carrier family 25 (mitochondrial carrier), member 18	22	18043182	18073647	22q11.21	-0.0255613	0.846283	1	SMARCB1	6055502	0	2		LE:K_562 22:17302010-18947036,ME:SK_MEL_2 22:17102551-18088166	FALSE	FALSE
	DGCR5	26220	DiGeorge syndrome critical region gene 5 (non-protein coding)	22	18958010	18982142	22q11.21	-0.0160544	0.903098	1	SMARCB1	5147007	3	2	ME:MALME_3M 22:18912528-21456518,LC:HOP_62 22:18638972-19787415,OV:OVCAR_5 22:18642119-20043680	PR:DU_145(DTP) 22:18956602-20089647,PR:RC01 22:18954971-20042440	FALSE	FALSE
	DGCR2	9993	DiGeorge syndrome critical region gene 2	22	19023794	19109967	22q11.21	0.660953	9.06155e-09	0.000154934	SMARCB1	5019182	3	2	ME:MALME_3M 22:18912528-21456518,LC:HOP_62 22:18638972-19787415,OV:OVCAR_5 22:18642119-20043680	PR:DU_145(DTP) 22:18956602-20089647,PR:RC01 22:18954971-20042440	FALSE	FALSE
	TSSK2	23617	testis-specific serine kinase 2	22	19118320	19120136	22q11.21	-0.0868907	0.512868	1	SMARCB1	5009013	3	2	ME:MALME_3M 22:18912528-21456518,LC:HOP_62 22:18638972-19787415,OV:OVCAR_5 22:18642119-20043680	PR:DU_145(DTP) 22:18956602-20089647,PR:RC01 22:18954971-20042440	FALSE	FALSE
	DGCR14	8220	DiGeorge syndrome critical region gene 14	22	19117791	19132190	22q11.21	0.849549	9.45687e-18	1.74754e-13	SMARCB1	4996959	3	2	ME:MALME_3M 22:18912528-21456518,LC:HOP_62 22:18638972-19787415,OV:OVCAR_5 22:18642119-20043680	PR:DU_145(DTP) 22:18956602-20089647,PR:RC01 22:18954971-20042440	FALSE	FALSE
	DGCR10	26222	DiGeorge syndrome critical region gene 10	22	19010136	19011063	22q11.21	0.0122282	0.926761	1	SMARCB1	5118086	3	2	ME:MALME_3M 22:18912528-21456518,LC:HOP_62 22:18638972-19787415,OV:OVCAR_5 22:18642119-20043680	PR:DU_145(DTP) 22:18956602-20089647,PR:RC01 22:18954971-20042440	FALSE	FALSE
	DGCR11	25786	DiGeorge syndrome critical region gene 11	22	19033674	19035888	22q11.21	0.0178792	0.893082	1	SMARCB1	5093261	3	2	ME:MALME_3M 22:18912528-21456518,LC:HOP_62 22:18638972-19787415,OV:OVCAR_5 22:18642119-20043680	PR:DU_145(DTP) 22:18956602-20089647,PR:RC01 22:18954971-20042440	FALSE	FALSE
	SLC25A1	6576	solute carrier family 25 (mitochondrial carrier; citrate transporter), member 1	22	19163087	19166338	22q11.21	0.58867	7.53781e-07	0.0119693	SMARCB1	4962811	3	2	ME:MALME_3M 22:18912528-21456518,LC:HOP_62 22:18638972-19787415,OV:OVCAR_5 22:18642119-20043680	PR:DU_145(DTP) 22:18956602-20089647,PR:RC01 22:18954971-20042440	FALSE	FALSE
	CLDN5	7122	claudin 5	22	19510546	19512860	22q11.21	-0.173484	0.18497	1	SMARCB1	4616289	3	2	ME:MALME_3M 22:18912528-21456518,LC:HOP_62 22:18638972-19787415,OV:OVCAR_5 22:18642119-20043680	PR:DU_145(DTP) 22:18956602-20089647,PR:RC01 22:18954971-20042440	FALSE	FALSE
	UFD1L	7353	ubiquitin fusion degradation 1 like (yeast)	22	19437463	19466738	22q11.21	0.7948	3.41657e-14	6.2677e-10	SMARCB1	4662411	3	2	ME:MALME_3M 22:18912528-21456518,LC:HOP_62 22:18638972-19787415,OV:OVCAR_5 22:18642119-20043680	PR:DU_145(DTP) 22:18956602-20089647,PR:RC01 22:18954971-20042440	FALSE	FALSE
	CDC45	8318	cell division cycle 45 homolog (S. cerevisiae)	22	19467413	19508135	22q11.21	0.713119	2.34176e-10	4.14467e-06	SMARCB1	4621014	3	2	ME:MALME_3M 22:18912528-21456518,LC:HOP_62 22:18638972-19787415,OV:OVCAR_5 22:18642119-20043680	PR:DU_145(DTP) 22:18956602-20089647,PR:RC01 22:18954971-20042440	FALSE	FALSE
	MRPL40	64976	mitochondrial ribosomal protein L40	22	19420035	19423596	22q11.21	0.661835	8.52204e-09	0.000145804	SMARCB1	4705553	3	2	ME:MALME_3M 22:18912528-21456518,LC:HOP_62 22:18638972-19787415,OV:OVCAR_5 22:18642119-20043680	PR:DU_145(DTP) 22:18956602-20089647,PR:RC01 22:18954971-20042440	FALSE	FALSE
	C22orf39	128977	chromosome 22 open reading frame 39	22	19428409	19435755	22q11.21	0.266609	0.0412359	1	SMARCB1	4693394	3	2	ME:MALME_3M 22:18912528-21456518,LC:HOP_62 22:18638972-19787415,OV:OVCAR_5 22:18642119-20043680	PR:DU_145(DTP) 22:18956602-20089647,PR:RC01 22:18954971-20042440	FALSE	FALSE
	LOC150185	150185	hypothetical LOC150185	22	19553652	19554362	22q11.21	-0.136489	0.302639	1	SMARCB1	4574787	3	2	ME:MALME_3M 22:18912528-21456518,LC:HOP_62 22:18638972-19787415,OV:OVCAR_5 22:18642119-20043680	PR:DU_145(DTP) 22:18956602-20089647,PR:RC01 22:18954971-20042440	FALSE	FALSE
	TBX1	6899	T-box 1	22	19744225	19771112	22q11.21	0.0646932	0.623366	1	SMARCB1	4358037	4	2	CO:HT29 22:19584787-21275284,ME:MALME_3M 22:18912528-21456518,LC:HOP_62 22:18638972-19787415,OV:OVCAR_5 22:18642119-20043680	PR:DU_145(DTP) 22:18956602-20089647,PR:RC01 22:18954971-20042440	FALSE	FALSE
	SEPT5	5413	septin 5	22	19701986	19710845	22q11.21	0.393294	0.00187932	1	SMARCB1	4418304	4	2	CO:HT29 22:19584787-21275284,ME:MALME_3M 22:18912528-21456518,LC:HOP_62 22:18638972-19787415,OV:OVCAR_5 22:18642119-20043680	PR:DU_145(DTP) 22:18956602-20089647,PR:RC01 22:18954971-20042440	FALSE	FALSE
	C22orf29	79680	chromosome 22 open reading frame 29	22	19833660	19842371	22q11.21	0.630216	6.82468e-08	0.00113358	SMARCB1	4286778	3	2	CO:HT29 22:19584787-21275284,ME:MALME_3M 22:18912528-21456518,OV:OVCAR_5 22:18642119-20043680	PR:DU_145(DTP) 22:18956602-20089647,PR:RC01 22:18954971-20042440	FALSE	FALSE
	ARVCF	421	armadillo repeat gene deleted in velocardiofacial syndrome	22	19957401	20004309	22q11.21	0.479609	0.000105608	1	SMARCB1	4124840	3	2	CO:HT29 22:19584787-21275284,ME:MALME_3M 22:18912528-21456518,OV:OVCAR_5 22:18642119-20043680	PR:DU_145(DTP) 22:18956602-20089647,PR:RC01 22:18954971-20042440	FALSE	FALSE
	COMT	1312	catechol-O-methyltransferase	22	19929262	19957498	22q11.21	0.776821	2.97849e-13	5.44378e-09	SMARCB1	4171651	3	2	CO:HT29 22:19584787-21275284,ME:MALME_3M 22:18912528-21456518,OV:OVCAR_5 22:18642119-20043680	PR:DU_145(DTP) 22:18956602-20089647,PR:RC01 22:18954971-20042440	FALSE	FALSE
	TMEM191A	84222	transmembrane protein 191A	22	21055401	21058891	22q11.21	-0.0832505	0.530746	1	SMARCB1	3070258	6	2	CO:HT29 22:19584787-21275284,ME:MALME_3M 22:18912528-21456518,OV:OVCAR_5 22:21024761-21421153,OV:SK_OV_3 22:20174705-21247870,PR:DU_145(DTP) 22:20100134-21957755,PR:RC01 22:20055495-21964328	ME:SK_MEL_2 22:20064512-22647780,LC:EKVX 22:20013881-22212684	FALSE	FALSE
	SERPIND1	3053	serpin peptidase inhibitor, clade D (heparin cofactor), member 1	22	21128382	21142008	22q11.21	-0.125825	0.338089	1	SMARCB1	2987141	6	2	CO:HT29 22:19584787-21275284,ME:MALME_3M 22:18912528-21456518,OV:OVCAR_5 22:21024761-21421153,OV:SK_OV_3 22:20174705-21247870,PR:DU_145(DTP) 22:20100134-21957755,PR:RC01 22:20055495-21964328	ME:SK_MEL_2 22:20064512-22647780,LC:EKVX 22:20013881-22212684	FALSE	FALSE
	AIFM3	150209	apoptosis-inducing factor, mitochondrion-associated, 3	22	21319417	21335649	22q11.21	0.0115141	0.930422	1	SMARCB1	2793500	4	2	ME:MALME_3M 22:18912528-21456518,OV:OVCAR_5 22:21024761-21421153,PR:DU_145(DTP) 22:20100134-21957755,PR:RC01 22:20055495-21964328	ME:SK_MEL_2 22:20064512-22647780,LC:EKVX 22:20013881-22212684	FALSE	FALSE
	LZTR1	8216	leucine-zipper-like transcription regulator 1	22	21336557	21353326	22q11.21	0.792381	4.62887e-14	8.48795e-10	SMARCB1	2775823	4	2	ME:MALME_3M 22:18912528-21456518,OV:OVCAR_5 22:21024761-21421153,PR:DU_145(DTP) 22:20100134-21957755,PR:RC01 22:20055495-21964328	ME:SK_MEL_2 22:20064512-22647780,LC:EKVX 22:20013881-22212684	FALSE	FALSE
	THAP7	80764	THAP domain containing 7	22	21354060	21356404	22q11.21	0.802625	1.24351e-14	2.28445e-10	SMARCB1	2772745	4	2	ME:MALME_3M 22:18912528-21456518,OV:OVCAR_5 22:21024761-21421153,PR:DU_145(DTP) 22:20100134-21957755,PR:RC01 22:20055495-21964328	ME:SK_MEL_2 22:20064512-22647780,LC:EKVX 22:20013881-22212684	FALSE	FALSE
	CRKL	1399	v-crk sarcoma virus CT10 oncogene homolog (avian)-like	22	21271713	21308037	22q11.21	0.83482	1.14459e-16	2.11257e-12	SMARCB1	2821112	4	2	ME:MALME_3M 22:18912528-21456518,OV:OVCAR_5 22:21024761-21421153,PR:DU_145(DTP) 22:20100134-21957755,PR:RC01 22:20055495-21964328	ME:SK_MEL_2 22:20064512-22647780,LC:EKVX 22:20013881-22212684	FALSE	FALSE
	P2RX6P	440799	purinergic receptor P2X, ligand-gated ion channel, 6 pseudogene	22	21396680	21398538	22q11.21	-0.0437985	0.739674	1	SMARCB1	2730611	4	2	ME:MALME_3M 22:18912528-21456518,OV:OVCAR_5 22:21024761-21421153,PR:DU_145(DTP) 22:20100134-21957755,PR:RC01 22:20055495-21964328	ME:SK_MEL_2 22:20064512-22647780,LC:EKVX 22:20013881-22212684	FALSE	FALSE
	LOC400891	400891	chromosome 14 open reading frame 166B pseudogene	22	21400248	21418457	22q11.21	0.298544	0.0205047	1	SMARCB1	2710692	4	2	ME:MALME_3M 22:18912528-21456518,OV:OVCAR_5 22:21024761-21421153,PR:DU_145(DTP) 22:20100134-21957755,PR:RC01 22:20055495-21964328	ME:SK_MEL_2 22:20064512-22647780,LC:EKVX 22:20013881-22212684	FALSE	FALSE
	P2RX6	9127	purinergic receptor P2X, ligand-gated ion channel, 6	22	21369441	21382302	22q11.21	0.263399	0.043835	1	SMARCB1	2746847	4	2	ME:MALME_3M 22:18912528-21456518,OV:OVCAR_5 22:21024761-21421153,PR:DU_145(DTP) 22:20100134-21957755,PR:RC01 22:20055495-21964328	ME:SK_MEL_2 22:20064512-22647780,LC:EKVX 22:20013881-22212684	FALSE	FALSE
	SLC7A4	6545	solute carrier family 7 (cationic amino acid transporter, y+ system), member 4	22	21383006	21386847	22q11.21	0.264565	0.0410764	1	SMARCB1	2742302	4	2	ME:MALME_3M 22:18912528-21456518,OV:OVCAR_5 22:21024761-21421153,PR:DU_145(DTP) 22:20100134-21957755,PR:RC01 22:20055495-21964328	ME:SK_MEL_2 22:20064512-22647780,LC:EKVX 22:20013881-22212684	FALSE	FALSE
	TOP3B	8940	topoisomerase (DNA) III beta	22	22311402	22337147	22q11.22	0.86031	1.2852e-18	2.3757e-14	SMARCB1	1792002	1	2	LC:EKVX 22:22219232-22496180	ME:SK_MEL_2 22:20064512-22647780,OV:OVCAR_5 22:21425728-23630559	FALSE	FALSE
	TTC28-AS1	284900	TTC28 antisense RNA 1 (non-protein coding)	22	28315363	28398667	22q12.1	0.200105	0.125288	1	NF2	1600877	0	2		OV:OVCAR_5 22:28346315-28443508,RE:SN12C 22:28345155-28506232	FALSE	FALSE
	LIMK2	3985	LIM domain kinase 2	22	31608249	31676066	22q12.2	0.474538	0.000127839	1	NF2	1513660	0	2		CO:SW_620 22:31657939-32183478,OV:OVCAR_5 22:31574028-33030296	FALSE	FALSE
	PIK3IP1	113791	phosphoinositide-3-kinase interacting protein 1	22	31677578	31688520	22q12.2	0.0443358	0.736596	1	NF2	1582989	0	2		CO:SW_620 22:31657939-32183478,OV:OVCAR_5 22:31574028-33030296	FALSE	FALSE
	PATZ1	23598	POZ (BTB) and AT hook containing zinc finger 1	22	31721789	31742249	22q12.2	0.276984	0.0321541	1	NF2	1627200	0	2		CO:SW_620 22:31657939-32183478,OV:OVCAR_5 22:31574028-33030296	FALSE	FALSE
	DRG1	4733	developmentally regulated GTP binding protein 1	22	31795538	31830172	22q12.2	0.728165	4.31267e-11	7.72572e-07	NF2	1700949	0	2		CO:SW_620 22:31657939-32183478,OV:OVCAR_5 22:31574028-33030296	FALSE	FALSE
	C22orf24	25775	chromosome 22 open reading frame 24	22	32329506	32341336	22q12.3	0.0194555	0.883719	1	NF2	2234917	0	2		LC:HOP_62 22:31896795-33150044,OV:OVCAR_5 22:31574028-33030296	FALSE	FALSE
	YWHAH	7533	tyrosine 3-monooxygenase/tryptophan 5-monooxygenase activation protein, eta polypeptide	22	32340478	32353590	22q12.3	0.52385	1.74421e-05	0.255597	NF2	2245889	0	2		LC:HOP_62 22:31896795-33150044,OV:OVCAR_5 22:31574028-33030296	FALSE	FALSE
	RFPL2	10739	ret finger protein-like 2	22	32586421	32600718	22q12.3	-0.0106262	0.936335	1	NF2	2491832	0	2		LC:HOP_62 22:31896795-33150044,OV:OVCAR_5 22:31574028-33030296	FALSE	FALSE
	AP1B1P1	23782	adaptor-related protein complex 1, beta 1 subunit pseudogene 1	22	32517963	32529456	22q12.3	0.524798	2.34718e-05	0.34067	NF2	2423374	0	2		LC:HOP_62 22:31896795-33150044,OV:OVCAR_5 22:31574028-33030296	FALSE	FALSE
	RFPL3S	10737	RFPL3 antisense RNA (non-protein coding)	22	32755892	32767063	22q12.3	0.0425945	0.748726	1	NF2	2661303	0	2		LC:HOP_62 22:31896795-33150044,OV:OVCAR_5 22:31574028-33030296	FALSE	FALSE
	RFPL3	10738	ret finger protein-like 3	22	32750871	32757148	22q12.3	-0.140119	0.294145	1	NF2	2656282	0	2		LC:HOP_62 22:31896795-33150044,OV:OVCAR_5 22:31574028-33030296	FALSE	FALSE
	FBXO7	25793	F-box protein 7	22	32870706	32894818	22q12.3	0.634481	5.226e-08	0.000872167	NF2	2776117	0	2		LC:HOP_62 22:31896795-33150044,OV:OVCAR_5 22:31574028-33030296	FALSE	FALSE
	C22orf28	51493	chromosome 22 open reading frame 28	22	32783561	32808274	22q12.3	0.689148	1.14497e-09	2.0005e-05	NF2	2688972	0	2		LC:HOP_62 22:31896795-33150044,OV:OVCAR_5 22:31574028-33030296	FALSE	FALSE
	SOX10	6663	SRY (sex determining region Y)-box 10	22	38368318	38380539	22q13.1	0.644568	2.73437e-08	0.00046085	EP300	3108074	2	2	ME:SK_MEL_2 22:38320850-38751671,ME:UACC_62 22:37995397-38499616	LC:NCI_H460 22:38156301-39608977,RE:TK_10 22:38340812-38387694	FALSE	FALSE
	POLR2F	5435	polymerase (RNA) II (DNA directed) polypeptide F	22	38349673	38365319	22q13.1	0.789126	1.13642e-13	2.08135e-09	EP300	3123294	2	2	ME:SK_MEL_2 22:38320850-38751671,ME:UACC_62 22:37995397-38499616	LC:NCI_H460 22:38156301-39608977,RE:TK_10 22:38340812-38387694	FALSE	FALSE
	C22orf23	84645	chromosome 22 open reading frame 23	22	38339056	38349676	22q13.1	0.425465	0.000701737	1	EP300	3138937	2	2	ME:SK_MEL_2 22:38320850-38751671,ME:UACC_62 22:37995397-38499616	LC:NCI_H460 22:38156301-39608977,RE:TK_10 22:38340812-38387694	FALSE	FALSE
	SCP2	6342	sterol carrier protein 2	1	53392900	53517289	1p32.3	0.308	0.0166618	1	CDKN2C	1952591	0	1		CO:HT29 1:53207719-53427203	FALSE	FALSE
	ITGB3BP	23421	integrin beta 3 binding protein (beta3-endonexin)	1	63906440	63988944	1p31.3	0.528508	1.68804e-05	0.247539	JAK1	1309961	0	1		LC:NCI_H460 1:63725106-64269606	FALSE	FALSE
	LRRC7	57554	leucine rich repeat containing 7	1	70225857	70589171	1p31.1	0.165838	0.209377	1	JAK1	4793670	0	1		RE:RXF_393 1:70487820-70676274	FALSE	FALSE
	GCLM	2730	glutamate-cysteine ligase, modifier subunit	1	94352589	94375012	1p22.1	0.336996	0.00846465	1	FUBP1	15907812	0	1		LC:NCI_H226 1:94275034-94874168	FALSE	FALSE
	RHOC	389	ras homolog gene family, member C	1	113243748	113250025	1p13.2	0.515667	2.48049e-05	0.359423	CD58	3807130	0	1		BR:MCF7 1:112590197-114060375	FALSE	FALSE
	PPP1R12B	4660	protein phosphatase 1, regulatory (inhibitor) subunit 12B	1	202317829	202557697	1q32.1	0.477706	0.000113497	1	IRF6	7401270	0	1		PR:PC_3 1:201457637-202707592	FALSE	FALSE
	SRGAP2	23380	SLIT-ROBO Rho GTPase activating protein 2	1	206516199	206637783	1q32.1	0.275805	0.0329251	1	IRF6	3321184	1	1	OV:OVCAR_3 1:205594459-206643962	PR:PC_3 1:205120908-206724737	FALSE	FALSE
	LOC100130331	100130331	actin, gamma-like	1	238025474	238091619	1q43	0.0917583	0.485629	1	IRF6	28045954	0	1		LC:EKVX 1:238023005-238115600	FALSE	FALSE
	KIF26B	55083	kinesin family member 26B	1	245318286	245866428	1q44	0.151742	0.247119	1	IRF6	35338766	0	1		RE:UO_31 1:245855385-246246436	FALSE	FALSE
	LOC100130557	100130557	hypothetical LOC100130557	1	41154751	41157933	1p34.2	0.266205	0.0397924	1	CDKN2C	10276433	0	1		OV:SK_OV_3 1:41088914-41217597	FALSE	FALSE
	KCNQ4	9132	potassium voltage-gated channel, KQT-like subfamily, member 4	1	41249683	41306124	1p34.2	0.0737099	0.57568	1	CDKN2C	10128242	0	1		BR:T47D 1:41273084-41299150	FALSE	FALSE
	SKINTL	391037	Skint-like, pseudogene	1	48567386	48648100	1p33	0.00494138	0.970371	1	CDKN2C	2786266	1	1	LE:CCRF_CEM 1:48525441-48700299	CNS:SF_268 1:48637943-48976067	FALSE	FALSE
	SPATA6	54558	spermatogenesis associated 6	1	48761043	48937876	1p33	0.211046	0.10552	1	CDKN2C	2496490	0	1		CNS:SF_268 1:48637943-48976067	FALSE	FALSE
	ELAVL4	1996	ELAV (embryonic lethal, abnormal vision, Drosophila)-like 4 (Hu antigen D)	1	50513685	50667540	1p33	0.0728059	0.583695	1	CDKN2C	766826	0	1		PR:PC_3 1:50590444-51078379	FALSE	FALSE
	ZYG11B	79699	zyg-11 homolog B (C. elegans)	1	53192130	53293013	1p32.3	0.526826	1.53109e-05	0.225285	CDKN2C	1751821	0	1		CO:HT29 1:53207719-53427203	FALSE	FALSE
	ZYG11A	440590	zyg-11 homolog A (C. elegans)	1	53308182	53360247	1p32.3	0.186763	0.153052	1	CDKN2C	1867873	0	1		CO:HT29 1:53207719-53427203	FALSE	FALSE
	PGM1	5236	phosphoglucomutase 1	1	64058946	64125916	1p31.3	0.513598	2.70758e-05	0.391029	JAK1	1172989	0	1		LC:NCI_H460 1:63725106-64269606	FALSE	FALSE
	ROR1	4919	receptor tyrosine kinase-like orphan receptor 1	1	64239689	64647179	1p31.3	0.440808	0.000423456	1	JAK1	651726	0	1		LC:NCI_H460 1:63725106-64269606	FALSE	FALSE
	SLC35D1	23169	solute carrier family 35 (UDP-glucuronic acid/UDP-N-acetylgalactosamine dual transporter), member D1	1	67465014	67520080	1p31.3	0.438161	0.000462788	1	JAK1	2032827	0	1		LC:NCI_H460 1:67330311-67834037	FALSE	FALSE
	IL23R	149233	interleukin 23 receptor	1	67632168	67725650	1p31.3	-0.00238329	0.985581	1	JAK1	2199981	1	1	OV:SK_OV_3 1:67615097-68300561	LC:NCI_H460 1:67330311-67834037	FALSE	FALSE
	WDR78	79819	WD repeat domain 78	1	67278571	67390570	1p31.3	0.261049	0.0439443	1	JAK1	1846384	0	1		LC:NCI_H460 1:67330311-67834037	FALSE	FALSE
	LRRC40	55631	leucine rich repeat containing 40	1	70610484	70671361	1p31.1	0.721223	8.04565e-11	1.43534e-06	JAK1	5178297	0	1		RE:RXF_393 1:70487820-70676274	FALSE	FALSE
	ABCA4	24	ATP-binding cassette, sub-family A (ABC1), member 4	1	94458393	94586705	1p22.1	-0.0323704	0.806046	1	FUBP1	16013616	0	1		LC:NCI_H226 1:94275034-94874168	FALSE	FALSE
	OLFM3	118427	olfactomedin 3	1	102268126	102462790	1p21.1	-0.00677299	0.959396	1	CD58	14594365	1	1	LE:CCRF_CEM 1:102122856-102483211	ME:SK_MEL_2 1:102099305-102727763	FALSE	FALSE
	CTTNBP2NL	55917	CTTNBP2 N-terminal like	1	112938799	113003786	1p13.2	0.515307	2.51864e-05	0.364799	CD58	4053369	0	1		BR:MCF7 1:112590197-114060375	FALSE	FALSE
	ST7L	54879	suppression of tumorigenicity 7 like	1	113066140	113162040	1p13.2	0.441767	0.000409962	1	CD58	3895115	0	1		BR:MCF7 1:112590197-114060375	FALSE	FALSE
	MAGI3	260425	membrane associated guanylate kinase, WW and PDZ domain containing 3	1	113933474	114228545	1p13.2	0.30324	0.0185116	1	CD58	2828610	0	1		BR:MCF7 1:112590197-114060375	FALSE	FALSE
	LRIG2	9860	leucine-rich repeats and immunoglobulin-like domains 2	1	113615830	113667342	1p13.2	0.74439	9.29644e-12	1.67819e-07	CD58	3389813	0	1		BR:MCF7 1:112590197-114060375	FALSE	FALSE
	NGF	4803	nerve growth factor (beta polypeptide)	1	115828536	115880857	1p13.2	0.193623	0.138257	1	CD58	1176298	0	1		BR:MCF7 1:115701002-116767127	FALSE	FALSE
	CASQ2	845	calsequestrin 2 (cardiac muscle)	1	116242625	116311426	1p13.1	-0.139385	0.292395	1	CD58	745729	0	1		BR:MCF7 1:115701002-116767127	FALSE	FALSE
	SLC22A15	55356	solute carrier family 22, member 15	1	116519118	116612675	1p13.1	0.369005	0.00371593	1	CD58	444480	1	1	OV:OVCAR_3 1:116498991-117222151	BR:MCF7 1:115701002-116767127	FALSE	FALSE
	KIFAP3	22920	kinesin-associated protein 3	1	169890469	170043879	1q24.2	0.16551	0.206299	1	ABL2	9024582	0	1		PR:PC_3 1:169833375-170236945	FALSE	FALSE
	PRRX1	5396	paired related homeobox 1	1	170633312	170708541	1q24.2	-0.103816	0.429893	1	ABL2	8359920	0	1		PR:PC_3 1:170583840-170845903	FALSE	FALSE
	METTL11B	149281	methyltransferase like 11B	1	170115187	170136923	1q24.2	0.165719	0.209709	1	ABL2	8931538	0	1		PR:PC_3 1:169833375-170236945	FALSE	FALSE
	FAM5C	339479	family with sequence similarity 5, member C	1	190066796	190446759	1q31.1	0.0285061	0.828827	1	CDC73	2644328	0	1		OV:OVCAR_5 1:188699869-192224958	FALSE	FALSE
	RGS18	64407	regulator of G-protein signaling 18	1	192127591	192154945	1q31.2	0.013312	0.919591	1	CDC73	936142	0	1		OV:OVCAR_5 1:188699869-192224958	FALSE	FALSE
	KIF14	9928	kinesin family member 14	1	200520624	200589862	1q32.1	0.554177	5.27284e-06	0.0800891	CDC73	7296682	0	1		PR:PC_3 1:200309263-200791979	FALSE	FALSE
	CSRP1	1465	cysteine and glycine-rich protein 1	1	201452657	201476387	1q32.1	0.130555	0.320092	1	CDC73	8228715	0	1		PR:PC_3 1:201457637-202707592	FALSE	FALSE
	ARL8A	127829	ADP-ribosylation factor-like 8A	1	202102531	202113871	1q32.1	0.562699	2.87502e-06	0.0443156	IRF6	7845096	1	1	CO:HCT_15 1:202010161-202197380	PR:PC_3 1:201457637-202707592	FALSE	FALSE
	LGR6	59352	leucine-rich repeat containing G protein-coupled receptor 6	1	202163117	202288889	1q32.1	0.0404441	0.758985	1	IRF6	7670078	0	1		PR:PC_3 1:201457637-202707592	FALSE	FALSE
	SYT2	127833	synaptotagmin II	1	202559724	202679551	1q32.1	0.186817	0.15655	1	IRF6	7279416	0	1		PR:PC_3 1:201457637-202707592	FALSE	FALSE
	KDM5B	10765	lysine (K)-specific demethylase 5B	1	202696531	202777549	1q32.1	0.314053	0.0145396	1	IRF6	7181418	0	1		PR:PC_3 1:201457637-202707592	FALSE	FALSE
	LEMD1	93273	LEM domain containing 1	1	205350505	205391214	1q32.1	-0.031894	0.808846	1	IRF6	4567753	0	1		PR:PC_3 1:205120908-206724737	FALSE	FALSE
	DSTYK	25778	dual serine/threonine and tyrosine protein kinase	1	205111630	205180727	1q32.1	0.290315	0.0244384	1	IRF6	4778240	0	1		PR:PC_3 1:205120908-206724737	FALSE	FALSE
	RASSF5	83593	Ras association (RalGDS/AF-6) domain family member 5	1	206680878	206762616	1q32.1	0.216408	0.0967596	1	IRF6	3196351	0	1		PR:PC_3 1:205120908-206724737	FALSE	FALSE
	CENPF	1063	centromere protein F, 350/400kDa (mitosin)	1	214776531	214837914	1q41	0.435022	0.000513735	1	IRF6	4797011	0	1		PR:PC_3 1:214211286-214905474	FALSE	FALSE
	PTPN14	5784	protein tyrosine phosphatase, non-receptor type 14	1	214522038	214725024	1q41	0.18207	0.163829	1	IRF6	4542518	0	1		PR:PC_3 1:214211286-214905474	FALSE	FALSE
	CEP170	9859	centrosomal protein 170kDa	1	243287729	243418708	1q43	0.390212	0.00205496	1	IRF6	33308209	0	1		LC:HOP_62 1:243345848-243483611	FALSE	FALSE
	SDCCAG8	10806	serologically defined colon cancer antigen 8	1	243419306	243663393	1q43	0.286422	0.0265104	1	IRF6	33439786	0	1		LC:HOP_62 1:243345848-243483611	FALSE	FALSE
	RIMS3	9783	regulating synaptic membrane exocytosis 3	1	41086351	41131324	1p34.2	0.271644	0.0357692	1	CDKN2C	10303042	0	1		OV:SK_OV_3 1:41088914-41217597	FALSE	FALSE
	NFYC	4802	nuclear transcription factor Y, gamma	1	41157241	41237275	1p34.2	0.458279	0.000231266	1	CDKN2C	10197091	0	1		OV:SK_OV_3 1:41088914-41217597	FALSE	FALSE
	STIL	6491	SCL/TAL1 interrupting locus	1	47715810	47779819	1p33	0.594686	5.43522e-07	0.00869255	CDKN2C	3654547	0	1		LE:CCRF_CEM 1:47700478-47774224	FALSE	FALSE
	SLC5A9	200010	solute carrier family 5 (sodium/glucose cotransporter), member 9	1	48688356	48714316	1p33	0.221523	0.091764	1	CDKN2C	2720050	0	1		CNS:SF_268 1:48637943-48976067	FALSE	FALSE
	DMRTA2	63950	DMRT-like family A2	1	50883222	50889119	1p32.3	0.0583925	0.657643	1	CDKN2C	545247	0	1		PR:PC_3 1:50590444-51078379	FALSE	FALSE
	ECHDC2	55268	enoyl CoA hydratase domain containing 2	1	53361581	53387446	1p32.3	-0.00653336	0.960487	1	CDKN2C	1921272	0	1		CO:HT29 1:53207719-53427203	FALSE	FALSE
	FOXD3	27022	forkhead box D3	1	63788729	63790797	1p31.3	0.0230443	0.861262	1	JAK1	1508108	0	1		LC:NCI_H460 1:63725106-64269606	FALSE	FALSE
	ALG6	29929	asparagine-linked glycosylation 6, alpha-1,3-glucosyltransferase homolog (S. cerevisiae)	1	63833260	63904233	1p31.3	0.244188	0.0600737	1	JAK1	1394672	0	1		LC:NCI_H460 1:63725106-64269606	FALSE	FALSE
	EFCAB7	84455	EF-hand calcium binding domain 7	1	63989012	64038364	1p31.3	0.443322	0.00038893	1	JAK1	1260541	0	1		LC:NCI_H460 1:63725106-64269606	FALSE	FALSE
	MIER1	57708	mesoderm induction early response 1 homolog (Xenopus laevis)	1	67390577	67454302	1p31.3	0.491145	6.76112e-05	0.947301	JAK1	1958390	0	1		LC:NCI_H460 1:67330311-67834037	FALSE	FALSE
	C1orf141	400757	chromosome 1 open reading frame 141	1	67557858	67600654	1p31.3	-0.0936972	0.480276	1	JAK1	2125671	0	1		LC:NCI_H460 1:67330311-67834037	FALSE	FALSE
	IL12RB2	3595	interleukin 12 receptor, beta 2	1	67773046	67862583	1p31.3	0.0812763	0.537009	1	JAK1	2340859	1	1	OV:SK_OV_3 1:67615097-68300561	LC:NCI_H460 1:67330311-67834037	FALSE	FALSE
	SRSF11	9295	serine/arginine-rich splicing factor 11	1	70671364	70717701	1p31.1	0.68713	1.33788e-09	2.3346e-05	JAK1	5239177	0	1		RE:RXF_393 1:70487820-70676274	FALSE	FALSE
	DNTTIP2	30836	deoxynucleotidyltransferase, terminal, interacting protein 2	1	94335013	94344762	1p22.1	0.491204	7.80566e-05	1	FUBP1	15890236	0	1		LC:NCI_H226 1:94275034-94874168	FALSE	FALSE
	ARHGAP29	9411	Rho GTPase activating protein 29	1	94634462	94703307	1p22.1:1p21.3	0.331741	0.00961505	1	FUBP1	16189685	0	1		LC:NCI_H226 1:94275034-94874168	FALSE	FALSE
	CCND3	896	cyclin D3	6	41902670	42016610	6p21.1	0.26902	0.0376661	1	E2F3	21408725	1	1	BR:MDA_MB_231 6:39745390-43216372	LC:NCI_H522 6:40006812-44575692	FALSE	FALSE
	CAPZA1	829	capping protein (actin filament) muscle Z-line, alpha 1	1	113162074	113214241	1p13.2	0.641561	3.32497e-08	0.000558662	CD58	3842914	0	1		BR:MCF7 1:112590197-114060375	FALSE	FALSE
	MOV10	4343	Mov10, Moloney leukemia virus 10, homolog (mouse)	1	113217047	113243368	1p13.2	0.476437	0.000136478	1	CD58	3813787	0	1		BR:MCF7 1:112590197-114060375	FALSE	FALSE
	PPM1J	333926	protein phosphatase, Mg2+/Mn2+ dependent, 1J	1	113252615	113257950	1p13.2	0.223895	0.0854851	1	CD58	3799205	0	1		BR:MCF7 1:112590197-114060375	FALSE	FALSE
	FAM19A3	284467	family with sequence similarity 19 (chemokine (C-C motif)-like), member A3	1	113263188	113269856	1p13.2	0.395576	0.00175803	1	CD58	3787299	0	1		BR:MCF7 1:112590197-114060375	FALSE	FALSE
	AKR7A2P1	246182	aldo-keto reductase family 7, member A2 pseudogene 1	1	113465971	113467295	1p13.2	0.403221	0.00140107	1	CD58	3589860	0	1		BR:MCF7 1:112590197-114060375	FALSE	FALSE
	SLC16A1	6566	solute carrier family 16, member 1 (monocarboxylic acid transporter 1)	1	113454469	113498975	1p13.2	0.327859	0.0105497	1	CD58	3558180	0	1		BR:MCF7 1:112590197-114060375	FALSE	FALSE
	VANGL1	81839	vang-like 1 (van gogh, Drosophila)	1	116184573	116240845	1p13.1	0.506206	3.68564e-05	0.527674	CD58	816310	0	1		BR:MCF7 1:115701002-116767127	FALSE	FALSE
	NHLH2	4808	nescient helix loop helix 2	1	116378998	116383747	1p13.1	-0.0838075	0.527991	1	CD58	673408	0	1		BR:MCF7 1:115701002-116767127	FALSE	FALSE
	SCYL3	57147	SCY1-like 3 (S. cerevisiae)	1	169822214	169863100	1q24.2	0.432744	0.000553844	1	ABL2	9205361	0	1		PR:PC_3 1:169833375-170236945	FALSE	FALSE
	CFH	3075	complement factor H	1	196621007	196716634	1q31.3	0.320645	0.0124969	1	CDC73	3397065	0	1		LE:RPMI_8226 1:196702498-196798048	FALSE	FALSE
	ZNF281	23528	zinc finger protein 281	1	200375419	200379166	1q32.1	0.409238	0.00116748	1	CDC73	7151477	0	1		PR:PC_3 1:200309263-200791979	FALSE	FALSE
	DDX59	83479	DEAD (Asp-Glu-Ala-Asp) box polypeptide 59	1	200613164	200639126	1q32.1	0.46739	0.000166505	1	CDC73	7389222	0	1		PR:PC_3 1:200309263-200791979	FALSE	FALSE
	RPS10P7	376693	ribosomal protein S10 pseudogene 7	1	201489031	201489720	1q32.1	0.0192478	0.884952	1	CDC73	8265089	0	1		PR:PC_3 1:201457637-202707592	FALSE	FALSE
	GPR37L1	9283	G protein-coupled receptor 37 like 1	1	202092028	202098634	1q32.1	0.235947	0.0695378	1	IRF6	7860333	1	1	CO:HCT_15 1:202010161-202197380	PR:PC_3 1:201457637-202707592	FALSE	FALSE
	PTPRVP	148713	protein tyrosine phosphatase, receptor type, V, pseudogene	1	202137178	202158577	1q32.1	0.144102	0.276208	1	IRF6	7800390	1	1	CO:HCT_15 1:202010161-202197380	PR:PC_3 1:201457637-202707592	FALSE	FALSE
	PTPN7	5778	protein tyrosine phosphatase, non-receptor type 7	1	202116140	202130716	1q32.1	0.0763502	0.562041	1	IRF6	7828251	1	1	CO:HCT_15 1:202010161-202197380	PR:PC_3 1:201457637-202707592	FALSE	FALSE
	UBE2T	29089	ubiquitin-conjugating enzyme E2T (putative)	1	202300784	202311094	1q32.1	0.368114	0.0038064	1	IRF6	7647873	0	1		PR:PC_3 1:201457637-202707592	FALSE	FALSE
	TMCC2	9911	transmembrane and coiled-coil domain family 2	1	205197037	205242471	1q32.1	0.21109	0.105447	1	IRF6	4716496	1	1	ME:MDA_MB_435 1:205119355-205243699	PR:PC_3 1:205120908-206724737	FALSE	FALSE
	KLHDC8A	55220	kelch domain containing 8A	1	205305192	205326218	1q32.1	-0.00899884	0.945595	1	IRF6	4632749	0	1		PR:PC_3 1:205120908-206724737	FALSE	FALSE
	NUAK2	81788	NUAK family, SNF1-like kinase, 2	1	205271190	205290883	1q32.1	0.160063	0.221838	1	IRF6	4668084	0	1		PR:PC_3 1:205120908-206724737	FALSE	FALSE
	CDK18	5129	cyclin-dependent kinase 18	1	205473683	205501921	1q32.1	0.0731437	0.581946	1	IRF6	4457046	0	1		PR:PC_3 1:205120908-206724737	FALSE	FALSE
	SLC45A3	85414	solute carrier family 45, member 3	1	205626980	205649630	1q32.1	-0.0956468	0.46725	1	IRF6	4309337	1	1	OV:OVCAR_3 1:205594459-206643962	PR:PC_3 1:205120908-206724737	FALSE	FALSE
	ELK4	2005	ELK4, ETS-domain protein (SRF accessory protein 1)	1	205577070	205602000	1q32.1	0.39563	0.00175521	1	IRF6	4356967	0	1		PR:PC_3 1:205120908-206724737	FALSE	FALSE
	MFSD4	148808	major facilitator superfamily domain containing 4	1	205538111	205572046	1q32.1	0.504541	3.94692e-05	0.563739	IRF6	4386921	0	1		PR:PC_3 1:205120908-206724737	FALSE	FALSE
	SLC41A1	254428	solute carrier family 41, member 1	1	205758220	205782161	1q32.1	0.402205	0.0014444	1	IRF6	4176806	1	1	OV:OVCAR_3 1:205594459-206643962	PR:PC_3 1:205120908-206724737	FALSE	FALSE
	RAB7L1	8934	RAB7, member RAS oncogene family-like 1	1	205737113	205744610	1q32.1	0.16511	0.207415	1	IRF6	4214357	1	1	OV:OVCAR_3 1:205594459-206643962	PR:PC_3 1:205120908-206724737	FALSE	FALSE
	NUCKS1	64710	nuclear casein kinase and cyclin-dependent kinase substrate 1	1	205681946	205719372	1q32.1	0.680904	2.14641e-09	3.7296e-05	IRF6	4239595	1	1	OV:OVCAR_3 1:205594459-206643962	PR:PC_3 1:205120908-206724737	FALSE	FALSE
	PM20D1	148811	peptidase M20 domain containing 1	1	205797149	205819276	1q32.1	0.230427	0.0791256	1	IRF6	4139691	1	1	OV:OVCAR_3 1:205594459-206643962	PR:PC_3 1:205120908-206724737	FALSE	FALSE
	SLC26A9	115019	solute carrier family 26, member 9	1	205882176	205912588	1q32.1	0.0533032	0.685854	1	IRF6	4046379	1	1	OV:OVCAR_3 1:205594459-206643962	PR:PC_3 1:205120908-206724737	FALSE	FALSE
	FAM72A	729533	family with sequence similarity 72, member A	1	206138910	206155074	1q32.1	0.117207	0.372467	1	IRF6	3803893	1	1	OV:OVCAR_3 1:205594459-206643962	PR:PC_3 1:205120908-206724737	FALSE	FALSE
	C1orf186	440712	chromosome 1 open reading frame 186	1	206238881	206288236	1q32.1	0.120035	0.360961	1	IRF6	3670731	1	1	OV:OVCAR_3 1:205594459-206643962	PR:PC_3 1:205120908-206724737	FALSE	FALSE
	CTSE	1510	cathepsin E	1	206317458	206332104	1q32.1	-0.135841	0.300718	1	IRF6	3626863	1	1	OV:OVCAR_3 1:205594459-206643962	PR:PC_3 1:205120908-206724737	FALSE	FALSE
	IKBKE	9641	inhibitor of kappa light polypeptide gene enhancer in B-cells, kinase epsilon	1	206643585	206670223	1q32.1	0.212495	0.103094	1	IRF6	3288744	0	1		PR:PC_3 1:205120908-206724737	FALSE	FALSE
	SMYD2	56950	SET and MYND domain containing 2	1	214454564	214510477	1q32.3:1q41	0.493648	6.12476e-05	0.861448	IRF6	4475044	0	1		PR:PC_3 1:214211286-214905474	FALSE	FALSE
	ZP4	57829	zona pellucida glycoprotein 4	1	238041163	238054222	1q43	-0.00859598	0.94848	1	IRF6	28061643	0	1		LC:EKVX 1:238023005-238115600	FALSE	FALSE
	OR2T11	127077	olfactory receptor, family 2, subfamily T, member 11	1	248789478	248790429	1q44	-0.0453025	0.733326	1	IRF6	38809958	0	1		ME:MDA_MB_435 1:248758902-248793480	FALSE	FALSE
	VSNL1	7447	visinin-like 1	2	17721806	17837706	2p24.2	-0.0678856	0.606292	1	DNMT3A	7618123	1	1	CNS:SF_295 2:15606596-18067963	LE:CCRF_CEM 2:17269810-19683039	FALSE	FALSE
	LRRTM4	80059	leucine rich repeat transmembrane neuronal 4	2	76974849	77749502	2p12	0.291868	0.0236505	1	MSH6	28940757	0	1		CO:SW_620 2:77697058-77952108	FALSE	FALSE
	TBC1D8	11138	TBC1 domain family, member 8 (with GRAM domain)	2	101623689	101767846	2q11.2	-0.0572251	0.664074	1	ACVR2A	46834723	0	1		LC:NCI_H23 2:101380723-103560644	FALSE	FALSE
	LOC541471	541471	hypothetical LOC541471	2	112124590	112252692	2q13	0.302754	0.0187096	1	ACVR2A	36349877	0	1		OV:SK_OV_3 2:110973315-113097786	FALSE	FALSE
	SPAG16	79582	sperm associated antigen 16	2	214149102	215275225	2q34	0.207438	0.111754	1	ACVR2A	65460709	0	1		CNS:U251 2:211338638-214174663	FALSE	FALSE
	IKZF2	22807	IKAROS family zinc finger 2 (Helios)	2	213864410	214016333	2q34	0.0244471	0.852907	1	ACVR2A	65176017	0	1		CNS:U251 2:211338638-214174663	FALSE	FALSE
	ITM2C	81618	integral membrane protein 2C	2	231729620	231743963	2q37.1	0.497934	5.16145e-05	0.730397	ACVR2A	83041227	0	1		CNS:U251 2:227843428-231919985	FALSE	FALSE
	TRIP12	9320	thyroid hormone receptor interactor 12	2	230631929	230786655	2q36.3	0.737954	1.73186e-11	3.11527e-07	ACVR2A	81943536	0	1		CNS:U251 2:227843428-231919985	FALSE	FALSE
	RAD51AP2	729475	RAD51 associated protein 2	2	17691985	17699706	2p24.2	-0.00174482	0.989536	1	DNMT3A	7756123	1	1	CNS:SF_295 2:15606596-18067963	LE:CCRF_CEM 2:17269810-19683039	FALSE	FALSE
	GEN1	348654	Gen homolog 1, endonuclease (Drosophila)	2	17935176	17966632	2p24.2	0.261482	0.0454505	1	DNMT3A	7489197	1	1	CNS:SF_295 2:15606596-18067963	LE:CCRF_CEM 2:17269810-19683039	FALSE	FALSE
	KCNS3	3790	potassium voltage-gated channel, delayed-rectifier, subfamily S, member 3	2	18059944	18114225	2p24.2	-0.0729572	0.582911	1	DNMT3A	7341604	0	1		LE:CCRF_CEM 2:17269810-19683039	FALSE	FALSE
	HEATR5B	54497	HEAT repeat containing 5B	2	37208152	37311485	2p22.2	0.452732	0.000281218	1	BIRC6	4364187	0	1		CO:HT29 2:37143291-37315573	FALSE	FALSE
	STRN	6801	striatin, calmodulin binding protein	2	37064840	37193615	2p22.2	0.497067	6.20787e-05	0.87264	BIRC6	4220875	0	1		CO:HT29 2:37143291-37315573	FALSE	FALSE
	VRK2	7444	vaccinia related kinase 2	2	58273776	58387055	2p16.1	0.463851	0.000189381	1	MSH6	10239684	0	1		PR:PC_3 2:58323070-58455477	FALSE	FALSE
	FANCL	55120	Fanconi anemia, complementation group L	2	58386377	58468515	2p16.1	0.604835	3.08312e-07	0.00498819	MSH6	10352285	0	1		PR:PC_3 2:58323070-58455477	FALSE	FALSE
	NPAS2	4862	neuronal PAS domain protein 2	2	101436612	101613287	2q11.2	0.268569	0.0380002	1	ACVR2A	46989282	0	1		LC:NCI_H23 2:101380723-103560644	FALSE	FALSE
	CREG2	200407	cellular repressor of E1A-stimulated genes 2	2	101964815	102003965	2q11.2	-0.153224	0.246613	1	ACVR2A	46598604	0	1		LC:NCI_H23 2:101380723-103560644	FALSE	FALSE
	MAP4K4	9448	mitogen-activated protein kinase kinase kinase kinase 4	2	102314164	102511152	2q11.2	0.355189	0.00535543	1	ACVR2A	46091417	0	1		LC:NCI_H23 2:101380723-103560644	FALSE	FALSE
	IL1R2	7850	interleukin 1 receptor, type II	2	102608305	102644884	2q11.2	0.0379443	0.773472	1	ACVR2A	45957685	1	1	OV:SK_OV_3 2:102565356-102766384	LC:NCI_H23 2:101380723-103560644	FALSE	FALSE
	SLC9A2	6549	solute carrier family 9 (sodium/hydrogen exchanger), member 2	2	103236165	103327809	2q12.1	-0.0464708	0.724404	1	ACVR2A	45274760	0	1		LC:NCI_H23 2:101380723-103560644	FALSE	FALSE
	TMEM182	130827	transmembrane protein 182	2	103378489	103434138	2q12.1	0.308169	0.0165992	1	ACVR2A	45168431	0	1		LC:NCI_H23 2:101380723-103560644	FALSE	FALSE
	BUB1	699	budding uninhibited by benzimidazoles 1 homolog (yeast)	2	111395408	111435684	2q13	0.525364	1.93413e-05	0.282422	ACVR2A	37166885	0	1		OV:SK_OV_3 2:110973315-113097786	FALSE	FALSE
	ACOXL	55289	acyl-CoA oxidase-like	2	111490149	111875799	2q13	-0.0559924	0.673599	1	ACVR2A	36726770	0	1		OV:SK_OV_3 2:110973315-113097786	FALSE	FALSE
	MERTK	10461	c-mer proto-oncogene tyrosine kinase	2	112656190	112786945	2q13	0.233945	0.0720079	1	ACVR2A	35815624	0	1		OV:SK_OV_3 2:110973315-113097786	FALSE	FALSE
	ANAPC1	64682	anaphase promoting complex subunit 1	2	112525213	112641741	2q13	0.104522	0.426746	1	ACVR2A	35960828	0	1		OV:SK_OV_3 2:110973315-113097786	FALSE	FALSE
	ZC3H8	84524	zinc finger CCCH-type containing 8	2	112973438	113012664	2q13	0.35796	0.00498309	1	ACVR2A	35589905	0	1		OV:SK_OV_3 2:110973315-113097786	FALSE	FALSE
	TMEM87B	84910	transmembrane protein 87B	2	112812799	112876895	2q13	0.301794	0.0191067	1	ACVR2A	35725674	0	1		OV:SK_OV_3 2:110973315-113097786	FALSE	FALSE
	GTDC1	79712	glycosyltransferase-like domain containing 1	2	144703580	145090083	2q22.3	0.233477	0.0725952	1	ACVR2A	3512486	0	1		BR:BT_549 2:144893373-145021621	FALSE	FALSE
	ACVR2A	92	activin A receptor, type IIA	2	148602569	148688393	2q22.3	0.383514	0.0024882	1	ACVR2A	0	2	1	OV:OVCAR_8 2:146879388-149912177,OV:NCI_ADR_RES 2:146879388-149915266	LE:CCRF_CEM 2:148271557-148620701	FALSE	FALSE
	ATF2	1386	activating transcription factor 2	2	175936977	176032934	2q31.1	0.622413	1.10064e-07	0.00181287	ACVR2A	27248584	0	1		LC:EKVX 2:175416009-176688733	FALSE	FALSE
	WIPF1	7456	WAS/WASL interacting protein family, member 1	2	175424301	175547627	2q31.1	0.177234	0.175506	1	ACVR2A	26735908	0	1		LC:EKVX 2:175416009-176688733	FALSE	FALSE
	CHN1	1123	chimerin (chimaerin) 1	2	175664041	175870107	2q31.1	0.134821	0.304399	1	ACVR2A	26975648	0	1		LC:EKVX 2:175416009-176688733	FALSE	FALSE
	GULP1	51454	GULP, engulfment adaptor PTB domain containing 1	2	189156395	189460652	2q32.1:2q32.2	0.526711	1.53886e-05	0.226336	ACVR2A	40468002	0	1		LC:EKVX 2:189296869-190567782	FALSE	FALSE
	ANKAR	150709	ankyrin and armadillo repeat containing	2	190540710	190611376	2q32.2	0.281093	0.0295846	1	ACVR2A	41852317	0	1		LC:EKVX 2:189296869-190567782	FALSE	FALSE
	COL5A2	1290	collagen, type V, alpha 2	2	189896640	190044605	2q32.2	0.0664593	0.613895	1	ACVR2A	41208247	1	1	LC:NCI_H522 2:189864246-190164062	LC:EKVX 2:189296869-190567782	FALSE	FALSE
	WDR75	84128	WD repeat domain 75	2	190306158	190340264	2q32.2	0.649034	2.03694e-08	0.000344528	ACVR2A	41617765	0	1		LC:EKVX 2:189296869-190567782	FALSE	FALSE
	ALS2CR8	79800	amyotrophic lateral sclerosis 2 (juvenile) chromosome region, candidate 8	2	203776977	203851060	2q33.2	0.149337	0.254775	1	ACVR2A	55088584	0	1		RE:RXF_393 2:203550144-204034897	FALSE	FALSE
	FAM117B	150864	family with sequence similarity 117, member B	2	203499900	203634480	2q33.2	0.344395	0.00704892	1	ACVR2A	54811507	0	1		RE:RXF_393 2:203550144-204034897	FALSE	FALSE
	NBEAL1	65065	neurobeachin-like 1	2	203879601	204082717	2q33.2	0.29533	0.0231564	1	ACVR2A	55191208	0	1		RE:RXF_393 2:203550144-204034897	FALSE	FALSE
	ICA1L	130026	islet cell autoantigen 1,69kDa-like	2	203637872	203736371	2q33.2	0.206344	0.113698	1	ACVR2A	54949479	0	1		RE:RXF_393 2:203550144-204034897	FALSE	FALSE
	CPS1	1373	carbamoyl-phosphate synthase 1, mitochondrial	2	211342405	211543831	2q34	0.239914	0.0648424	1	ACVR2A	62654012	0	1		CNS:U251 2:211338638-214174663	FALSE	FALSE
	COL4A3	1285	collagen, type IV, alpha 3 (Goodpasture antigen)	2	228029280	228179508	2q36.3	-0.00476116	0.971199	1	ACVR2A	79340887	0	1		CNS:U251 2:227843428-231919985	FALSE	FALSE
	RHBDD1	84236	rhomboid domain containing 1	2	227700670	227863923	2q36.3	0.200127	0.125246	1	ACVR2A	79012277	0	1		CNS:U251 2:227843428-231919985	FALSE	FALSE
	COL4A4	1286	collagen, type IV, alpha 4	2	227867426	228029275	2q36.3	-0.0184434	0.888764	1	ACVR2A	79179033	0	1		CNS:U251 2:227843428-231919985	FALSE	FALSE
	MFF	56947	mitochondrial fission factor	2	228189866	228222552	2q36.3	0.518779	2.1719e-05	0.316099	ACVR2A	79501473	0	1		CNS:U251 2:227843428-231919985	FALSE	FALSE
	SPHKAP	80309	SPHK1 interactor, AKAP domain containing	2	228844669	229046361	2q36.3	-0.315122	0.0150574	1	ACVR2A	80156276	0	1		CNS:U251 2:227843428-231919985	FALSE	FALSE
	DNER	92737	delta/notch-like EGF repeat containing	2	230222344	230579286	2q36.3	0.242764	0.0616303	1	ACVR2A	81533951	0	1		CNS:U251 2:227843428-231919985	FALSE	FALSE
	PID1	55022	phosphotyrosine interaction domain containing 1	2	229888688	230136057	2q36.3	0.125295	0.340145	1	ACVR2A	81200295	0	1		CNS:U251 2:227843428-231919985	FALSE	FALSE
	SP110	3431	SP110 nuclear body protein	2	231033644	231090444	2q37.1	0.27623	0.0326451	1	ACVR2A	82345251	0	1		CNS:U251 2:227843428-231919985	FALSE	FALSE
	SP100	6672	SP100 nuclear antigen	2	231280870	231410317	2q37.1	0.251427	0.0526436	1	ACVR2A	82592477	0	1		CNS:U251 2:227843428-231919985	FALSE	FALSE
	CAB39	51719	calcium binding protein 39	2	231577556	231685790	2q37.1	0.477133	0.000115977	1	ACVR2A	82889163	0	1		CNS:U251 2:227843428-231919985	FALSE	FALSE
	FBXO36	130888	F-box protein 36	2	230787206	230877825	2q36.3	0.0577539	0.661158	1	ACVR2A	82098813	0	1		CNS:U251 2:227843428-231919985	FALSE	FALSE
	SP140L	93349	SP140 nuclear body protein-like	2	231191893	231268445	2q37.1	0.336361	0.00859706	1	ACVR2A	82503500	0	1		CNS:U251 2:227843428-231919985	FALSE	FALSE
	SPATA3	130560	spermatogenesis associated 3	2	231860838	231871999	2q37.1	-0.157569	0.23331	1	ACVR2A	83172445	0	1		CNS:U251 2:227843428-231919985	FALSE	FALSE
	COL6A3	1293	collagen, type VI, alpha 3	2	238232654	238322850	2q37.3	0.113873	0.386312	1	ACVR2A	89544261	0	1		LE:RPMI_8226 2:238180434-238432408	FALSE	FALSE
	MLPH	79083	melanophilin	2	238395877	238463961	2q37.3	0.262487	0.0427523	1	ACVR2A	89707484	0	1		LE:RPMI_8226 2:238180434-238432408	FALSE	FALSE
	NDUFA10	4705	NADH dehydrogenase (ubiquinone) 1 alpha subcomplex, 10, 42kDa	2	240896788	240964819	2q37.3	0.549617	5.41115e-06	0.0821413	ACVR2A	92208395	0	1		CO:KM12 2:240432537-241330078	FALSE	FALSE
	SMC6	79677	structural maintenance of chromosomes 6	2	17845078	17935096	2p24.2	0.507614	3.47726e-05	0.498639	DNMT3A	7520733	1	1	CNS:SF_295 2:15606596-18067963	LE:CCRF_CEM 2:17269810-19683039	FALSE	FALSE
	MSGN1	343930	mesogenin 1	2	17997785	17998367	2p24.2	0.0412629	0.756335	1	DNMT3A	7457462	1	1	CNS:SF_295 2:15606596-18067963	LE:CCRF_CEM 2:17269810-19683039	FALSE	FALSE
	RDH14	57665	retinol dehydrogenase 14 (all-trans/9-cis/11-cis)	2	18735988	18741959	2p24.2	0.618771	1.75786e-07	0.00287427	DNMT3A	6713870	0	1		LE:CCRF_CEM 2:17269810-19683039	FALSE	FALSE
	NT5C1B	93034	5'-nucleotidase, cytosolic IB	2	18744136	18770846	2p24.2	0.231213	0.0807619	1	DNMT3A	6684983	0	1		LE:CCRF_CEM 2:17269810-19683039	FALSE	FALSE
	OSR1	130497	odd-skipped related 1 (Drosophila)	2	19551245	19558372	2p24.1	0.203036	0.119735	1	DNMT3A	5897457	0	1		LE:CCRF_CEM 2:17269810-19683039	FALSE	FALSE
	RPL31	6160	ribosomal protein L31	2	101618690	101636155	2q11.2	0.287412	0.02597	1	ACVR2A	46966414	0	1		LC:NCI_H23 2:101380723-103560644	FALSE	FALSE
	RNF149	284996	ring finger protein 149	2	101892062	101925178	2q11.2	0.213834	0.100891	1	ACVR2A	46677391	0	1		LC:NCI_H23 2:101380723-103560644	FALSE	FALSE
	SNORD89	692205	small nucleolar RNA, C/D box 89	2	101889397	101889511	2q11.2	0.127493	0.335911	1	ACVR2A	46713058	0	1		LC:NCI_H23 2:101380723-103560644	FALSE	FALSE
	RFX8	731220	regulatory factor X, 8	2	102013822	102091165	2q11.2	-0.0854653	0.519832	1	ACVR2A	46511404	0	1		LC:NCI_H23 2:101380723-103560644	FALSE	FALSE
	IL1R1	3554	interleukin 1 receptor, type I	2	102770401	102796334	2q12.1	-0.12441	0.343591	1	ACVR2A	45806235	0	1		LC:NCI_H23 2:101380723-103560644	FALSE	FALSE
	IL1RL2	8808	interleukin 1 receptor-like 2	2	102803432	102855811	2q12.1	0.490482	8.02666e-05	1	ACVR2A	45746758	0	1		LC:NCI_H23 2:101380723-103560644	FALSE	FALSE
	IL1RL1	9173	interleukin 1 receptor-like 1	2	102927961	102968497	2q12.1	-0.139242	0.288664	1	ACVR2A	45634072	0	1		LC:NCI_H23 2:101380723-103560644	FALSE	FALSE
	IL18R1	8809	interleukin 18 receptor 1	2	102979096	103015217	2q12.1	0.0225025	0.864492	1	ACVR2A	45587352	0	1		LC:NCI_H23 2:101380723-103560644	FALSE	FALSE
	IL18RAP	8807	interleukin 18 receptor accessory protein	2	103035253	103069024	2q12.1	-0.0352029	0.789448	1	ACVR2A	45533545	0	1		LC:NCI_H23 2:101380723-103560644	FALSE	FALSE
	SLC9A4	389015	solute carrier family 9 (sodium/hydrogen exchanger), member 4	2	103089761	103150431	2q12.1	0.0142514	0.914686	1	ACVR2A	45452138	0	1		LC:NCI_H23 2:101380723-103560644	FALSE	FALSE
	MFSD9	84804	major facilitator superfamily domain containing 9	2	103333665	103353337	2q12.1	0.387144	0.00224428	1	ACVR2A	45249232	0	1		LC:NCI_H23 2:101380723-103560644	FALSE	FALSE
	LOC100288570	100288570	two pore channel 3 pseudogene	2	110705266	111181393	2q13	-0.0561354	0.672812	1	ACVR2A	37421176	0	1		OV:SK_OV_3 2:110973315-113097786	FALSE	FALSE
	LOC151009	151009	hypothetical LOC151009	2	111132685	111142113	2q13	-0.0117303	0.929119	1	ACVR2A	37460456	0	1		OV:SK_OV_3 2:110973315-113097786	FALSE	FALSE
	BCL2L11	10018	BCL2-like 11 (apoptosis facilitator)	2	111878490	111926022	2q13	0.229622	0.0775816	1	ACVR2A	36676547	0	1		OV:SK_OV_3 2:110973315-113097786	FALSE	FALSE
	ZC3H6	376940	zinc finger CCCH-type containing 6	2	113033177	113097640	2q13	0.0225202	0.864387	1	ACVR2A	35504929	0	1		OV:SK_OV_3 2:110973315-113097786	FALSE	FALSE
	CHRNA1	1134	cholinergic receptor, nicotinic, alpha 1 (muscle)	2	175612322	175629200	2q31.1	0.207514	0.111619	1	ACVR2A	26923929	0	1		LC:EKVX 2:175416009-176688733	FALSE	FALSE
	ATP5G3	518	ATP synthase, H+ transporting, mitochondrial Fo complex, subunit C3 (subunit 9)	2	176040985	176046490	2q31.1	0.476393	0.000119249	1	ACVR2A	27352592	0	1		LC:EKVX 2:175416009-176688733	FALSE	FALSE
	DIRC1	116093	disrupted in renal carcinoma 1	2	189598464	189654831	2q32.2	-0.0992761	0.450441	1	ACVR2A	40910071	0	1		LC:EKVX 2:189296869-190567782	FALSE	FALSE
	COL3A1	1281	collagen, type III, alpha 1	2	189839098	189877472	2q32.2	-0.144899	0.269327	1	ACVR2A	41150705	0	1		LC:EKVX 2:189296869-190567782	FALSE	FALSE
	SLC40A1	30061	solute carrier family 40 (iron-regulated transporter), member 1	2	190425315	190445537	2q32.2	-0.272594	0.0351027	1	ACVR2A	41736922	0	1		LC:EKVX 2:189296869-190567782	FALSE	FALSE
	ASNSD1	54529	asparagine synthetase domain containing 1	2	190526124	190535557	2q32.2	0.530598	1.29563e-05	0.191533	ACVR2A	41837731	0	1		LC:EKVX 2:189296869-190567782	FALSE	FALSE
	WDR12	55759	WD repeat domain 12	2	203745322	203776949	2q33.2	0.548461	5.71485e-06	0.0866371	ACVR2A	55056929	0	1		RE:RXF_393 2:203550144-204034897	FALSE	FALSE
	LANCL1	10314	LanC lantibiotic synthetase component C-like 1 (bacterial)	2	211295972	211341499	2q34	0.609229	2.39732e-07	0.00389804	ACVR2A	62607579	0	1		CNS:U251 2:211338638-214174663	FALSE	FALSE
	TM4SF20	79853	transmembrane 4 L six family member 20	2	228226873	228244022	2q36.3	0.109637	0.404337	1	ACVR2A	79538480	0	1		CNS:U251 2:227843428-231919985	FALSE	FALSE
	AGFG1	3267	ArfGAP with FG repeats 1	2	228336887	228425938	2q36.3	0.571366	1.86265e-06	0.0290052	ACVR2A	79648494	0	1		CNS:U251 2:227843428-231919985	FALSE	FALSE
	C2orf83	56918	chromosome 2 open reading frame 83	2	228474805	228498036	2q36.3	-0.000887404	0.994678	1	ACVR2A	79786412	0	1		CNS:U251 2:227843428-231919985	FALSE	FALSE
	SLC19A3	80704	solute carrier family 19, member 3	2	228549925	228582745	2q36.3	0.163415	0.212181	1	ACVR2A	79861532	0	1		CNS:U251 2:227843428-231919985	FALSE	FALSE
	CCL20	6364	chemokine (C-C motif) ligand 20	2	228678557	228682280	2q36.3	0.264174	0.0413874	1	ACVR2A	79990164	0	1		CNS:U251 2:227843428-231919985	FALSE	FALSE
	SLC16A14	151473	solute carrier family 16, member 14 (monocarboxylic acid transporter 14)	2	230899689	230933715	2q36.3	0.0722833	0.583112	1	ACVR2A	82211296	0	1		CNS:U251 2:227843428-231919985	FALSE	FALSE
	SP140	11262	SP140 nuclear body protein	2	231090444	231177930	2q37.1	0.144128	0.271912	1	ACVR2A	82402051	0	1		CNS:U251 2:227843428-231919985	FALSE	FALSE
	GPR55	9290	G protein-coupled receptor 55	2	231772042	231789941	2q37.1	0.307809	0.0167327	1	ACVR2A	83083649	0	1		CNS:U251 2:227843428-231919985	FALSE	FALSE
	C2orf72	257407	chromosome 2 open reading frame 72	2	231902280	231914427	2q37.1	0.0563063	0.669153	1	ACVR2A	83213887	0	1		CNS:U251 2:227843428-231919985	FALSE	FALSE
	OTOS	150677	otospiralin	2	241078445	241080073	2q37.3	-0.0781003	0.556557	1	ACVR2A	92390052	0	1		CO:KM12 2:240432537-241330078	FALSE	FALSE
	MYEOV2	150678	myeloma overexpressed 2	2	241065979	241075764	2q37.3	0.569433	2.05416e-06	0.0319011	ACVR2A	92377586	0	1		CO:KM12 2:240432537-241330078	FALSE	FALSE
	CEP63	80254	centrosomal protein 63kDa	3	134204574	134293855	3q22.2	0.598368	4.4349e-07	0.00712201	SI	30402830	0	1		LC:NCI_H226 3:133868598-135683160	FALSE	FALSE
	HYAL3	8372	hyaluronoglucosaminidase 3	3	50330258	50336899	3p21.31	-0.0476236	0.717848	1	BAP1	2098125	0	1		LC:NCI_H226 3:50123353-50716570	FALSE	FALSE
	GOLIM4	27333	golgi integral membrane protein 4	3	167727653	167813417	3q26.2	0.68877	1.17895e-09	2.05939e-05	SI	2931370	0	1		OV:OVCAR_3 3:163782706-168351730	FALSE	FALSE
	EDEM1	9695	ER degradation enhancer, mannosidase alpha-like 1	3	5229358	5261650	3p26.1	0.222558	0.0874192	1	VHL	4921668	0	1		OV:OVCAR_3 3:5022526-5603024	FALSE	FALSE
	RBMS3	27303	RNA binding motif, single stranded interacting protein 3	3	29322802	30051886	3p24.1	0.264062	0.0414769	1	TGFBR2	596107	0	1		LC:NCI_H226 3:30003519-31446612	FALSE	FALSE
	CACNA2D3	55799	calcium channel, voltage-dependent, alpha 2/delta subunit 3	3	54156692	55108584	3p21.1:3p14.3	-0.0375423	0.775809	1	PBRM1	1436826	0	1		LC:NCI_H226 3:54135136-54565240	FALSE	FALSE
	DOCK3	1795	dedicator of cytokinesis 3	3	50712671	51421629	3p21.2	0.186421	0.15382	1	BAP1	1013395	0	1		LC:NCI_H226 3:50123353-50716570	FALSE	FALSE
	ERC2	26059	ELKS/RAB6-interacting/CAST family member 2	3	55542335	56502391	3p14.3	0.175516	0.179796	1	PBRM1	2822469	0	1		LC:NCI_H226 3:55919291-56454156	FALSE	FALSE
	ATXN7	6314	ataxin 7	3	63850232	63989136	3p14.1	0.735372	2.21176e-11	3.97386e-07	PBRM1	11130366	2	1	ME:UACC_62 3:62921398-66659418,OV:OVCAR_3 3:63398484-64339061	OV:NCI_ADR_RES 3:62124583-65994050	FALSE	FALSE
	CNTN3	5067	contactin 3 (plasmacytoma associated)	3	74311721	74570343	3p12.3	0.347998	0.00643775	1	ROBO1	4076044	0	1		RE:786_0 3:74293971-74591406	FALSE	FALSE
	GBE1	2632	glucan (1,4-alpha-), branching enzyme 1	3	81538849	81810950	3p12.2	0.483954	8.94451e-05	1	ROBO1	1721790	0	1		CO:HT29 3:79203427-82469693	FALSE	FALSE
	ROBO2	6092	roundabout, axon guidance receptor, homolog 2 (Drosophila)	3	77089293	77699114	3p12.3	0.420689	0.000817321	1	ROBO1	947273	0	1		RE:CAKI_1 3:76820808-77059868	FALSE	FALSE
	ROBO1	6091	roundabout, axon guidance receptor, homolog 1 (Drosophila)	3	78646387	79817059	3p12.3:3p12.2	0.594536	5.48027e-07	0.00876131	ROBO1	0	0	1		CO:HT29 3:79203427-82469693	FALSE	FALSE
	SLC15A2	6565	solute carrier family 15 (H+/peptide transporter), member 2	3	121613170	121663034	3q13.33	0.0678189	0.606647	1	ROBO1	41796111	1	1	RE:RXF_393 3:121383084-122054231	LC:NCI_H226 3:118273660-122283060	FALSE	FALSE
	TNIK	23043	TRAF2 and NCK interacting kinase	3	170780291	171178197	3q26.2:3q26.31	0.40086	0.00150364	1	SI	5984008	0	1		LC:NCI_H226 3:170397921-170979106	FALSE	FALSE
	KCNMB2	10242	potassium large conductance calcium-activated channel, subfamily M, beta member 2	3	178254223	178562217	3q26.32	0.112281	0.393028	1	SI	13457940	0	1		LC:NCI_H226 3:178238181-178851288	FALSE	FALSE
	LEPREL1	55214	leprecan-like 1	3	189674516	189840226	3q28	0.112037	0.394067	1	SI	24878233	0	1		BR:T47D 3:186826595-190135738	FALSE	FALSE
	TGFBR2	7048	transforming growth factor, beta receptor II (70/80kDa)	3	30647993	30735633	3p24.1	0.113405	0.388278	1	TGFBR2	0	0	1		LC:NCI_H226 3:30003519-31446612	FALSE	FALSE
	GADL1	339896	glutamate decarboxylase-like 1	3	30767691	30936153	3p24.1:3p23	0.113804	0.386602	1	TGFBR2	32058	0	1		LC:NCI_H226 3:30003519-31446612	FALSE	FALSE
	KIF15	56992	kinesin family member 15	3	44803208	44894748	3p21.31	0.462973	0.000195478	1	SETD2	2163149	0	1		CNS:SNB_19 3:44612980-44847604	FALSE	FALSE
	ZDHHC3	51304	zinc finger, DHHC-type containing 3	3	44956752	45017674	3p21.31	0.462083	0.000201852	1	SETD2	2040223	0	1		LC:NCI_H226 3:44989569-46043945	FALSE	FALSE
	ZNF35	7584	zinc finger protein 35	3	44690232	44702283	3p21.31	0.307252	0.0169414	1	SETD2	2355614	0	1		CNS:SNB_19 3:44612980-44847604	FALSE	FALSE
	LZTFL1	54585	leucine zipper transcription factor-like 1	3	45864809	45957216	3p21.31	0.340263	0.00781167	1	SETD2	1100681	0	1		LC:NCI_H226 3:44989569-46043945	FALSE	FALSE
	FYCO1	79443	FYVE and coiled-coil domain containing 1	3	45959390	46037316	3p21.31	0.429312	0.000619647	1	SETD2	1020581	0	1		LC:NCI_H226 3:44989569-46043945	FALSE	FALSE
	LARS2	23395	leucyl-tRNA synthetase 2, mitochondrial	3	45430074	45590328	3p21.31	0.618179	1.41882e-07	0.00232842	SETD2	1467569	0	1		LC:NCI_H226 3:44989569-46043945	FALSE	FALSE
	SACM1L	22908	SAC1 suppressor of actin mutations 1-like (yeast)	3	45730753	45786900	3p21.31	0.661538	8.70027e-09	0.000148809	SETD2	1270997	0	1		LC:NCI_H226 3:44989569-46043945	FALSE	FALSE
	SEMA3F	6405	sema domain, immunoglobulin domain (Ig), short basic domain, secreted, (semaphorin) 3F	3	50192847	50226508	3p21.31	-0.21768	0.0947662	1	BAP1	2208516	0	1		LC:NCI_H226 3:50123353-50716570	FALSE	FALSE
	CACNA2D2	9254	calcium channel, voltage-dependent, alpha 2/delta subunit 2	3	50400230	50540892	3p21.31	-0.0890506	0.498648	1	BAP1	1894132	0	1		LC:NCI_H226 3:50123353-50716570	FALSE	FALSE
	ITIH1	3697	inter-alpha (globulin) inhibitor H1	3	52811601	52826084	3p21.1	-0.0370463	0.780578	1	PBRM1	91735	0	1		LC:NCI_H226 3:52440053-53510920	FALSE	FALSE
	NT5DC2	64943	5'-nucleotidase domain containing 2	3	52558384	52569093	3p21.1	0.420512	0.00091284	1	PBRM1	10274	0	1		LC:NCI_H226 3:52440053-53510920	FALSE	FALSE
	DCP1A	55802	DCP1 decapping enzyme homolog A (S. cerevisiae)	3	53317444	53381654	3p21.1	0.49731	5.29245e-05	0.748246	PBRM1	597578	0	1		LC:NCI_H226 3:52440053-53510920	FALSE	FALSE
	PRKCD	5580	protein kinase C, delta	3	53195222	53226733	3p21.1	0.259259	0.0454663	1	PBRM1	475356	0	1		LC:NCI_H226 3:52440053-53510920	FALSE	FALSE
	PBRM1	55193	polybromo 1	3	52579367	52719866	3p21.1	0.608741	2.4656e-07	0.00400833	PBRM1	0	0	1		LC:NCI_H226 3:52440053-53510920	FALSE	FALSE
	SFMBT1	51460	Scm-like with four mbt domains 1	3	52937582	53080089	3p21.1	0.316659	0.0137003	1	PBRM1	217716	0	1		LC:NCI_H226 3:52440053-53510920	FALSE	FALSE
	CADPS	8618	Ca++-dependent secretion activator	3	62384020	62861064	3p14.2	0.411365	0.00109367	1	PBRM1	9664154	0	1		OV:NCI_ADR_RES 3:62124583-65994050	FALSE	FALSE
	THOC7	80145	THO complex 7 homolog (Drosophila)	3	63819545	63849597	3p14.1	0.830516	2.26568e-16	4.18017e-12	PBRM1	11099679	2	1	ME:UACC_62 3:62921398-66659418,OV:OVCAR_3 3:63398484-64339061	OV:NCI_ADR_RES 3:62124583-65994050	FALSE	FALSE
	C3orf49	132200	chromosome 3 open reading frame 49	3	63805040	63834312	3p14.1	0.0298186	0.822609	1	PBRM1	11085174	2	1	ME:UACC_62 3:62921398-66659418,OV:OVCAR_3 3:63398484-64339061	OV:NCI_ADR_RES 3:62124583-65994050	FALSE	FALSE
	SYNPR	132204	synaptoporin	3	63263913	63602597	3p14.2	0.00985299	0.94044	1	PBRM1	10544047	1	1	ME:UACC_62 3:62921398-66659418	OV:NCI_ADR_RES 3:62124583-65994050	FALSE	FALSE
	PRICKLE2	166336	prickle homolog 2 (Drosophila)	3	64079525	64211131	3p14.1	0.111758	0.395254	1	PBRM1	11359659	3	1	BR:MCF7 3:63990825-64947927,ME:UACC_62 3:62921398-66659418,OV:OVCAR_3 3:63398484-64339061	OV:NCI_ADR_RES 3:62124583-65994050	FALSE	FALSE
	MAGI1	9223	membrane associated guanylate kinase, WW and PDZ domain containing 1	3	65339905	66024509	3p14.1	0.200212	0.125082	1	PBRM1	12620039	1	1	ME:UACC_62 3:62921398-66659418	OV:NCI_ADR_RES 3:62124583-65994050	FALSE	FALSE
	SLC25A26	115286	solute carrier family 25, member 26	3	66119284	66429351	3p14.1	0.713039	1.63911e-10	2.90925e-06	ROBO1	12217036	1	1	ME:UACC_62 3:62921398-66659418	OV:NCI_ADR_RES 3:66304451-67097360	FALSE	FALSE
	LRIG1	26018	leucine-rich repeats and immunoglobulin-like domains 1	3	66429220	66550845	3p14.1	0.0556132	0.672994	1	ROBO1	12095542	1	1	ME:UACC_62 3:62921398-66659418	OV:NCI_ADR_RES 3:66304451-67097360	FALSE	FALSE
	FAM19A4	151647	family with sequence similarity 19 (chemokine (C-C motif)-like), member A4	3	68780914	68981761	3p14.1	-0.363745	0.00462709	1	ROBO1	9664626	0	1		OV:OVCAR_4 3:67992898-68909770	FALSE	FALSE
	MITF	4286	microphthalmia-associated transcription factor	3	69788585	70017488	3p14.1:3p13	0.734622	2.37318e-11	4.26317e-07	ROBO1	8628899	0	1		LC:NCI_H226 3:69960940-70968321	FALSE	FALSE
	ARHGAP31	57514	Rho GTPase activating protein 31	3	119013219	119138323	3q13.33	0.535	1.06354e-05	0.158127	ROBO1	39196160	0	1		LC:NCI_H226 3:118273660-122283060	FALSE	FALSE
	CD80	941	CD80 molecule	3	119243139	119278481	3q13.33	-0.141479	0.280911	1	ROBO1	39426080	0	1		LC:NCI_H226 3:118273660-122283060	FALSE	FALSE
	IGSF11	152404	immunoglobulin superfamily, member 11	3	118619478	118864898	3q13.32	0.347146	0.00657789	1	ROBO1	38802419	0	1		LC:NCI_H226 3:118273660-122283060	FALSE	FALSE
	GPR156	165829	G protein-coupled receptor 156	3	119884327	119963142	3q13.33	0.285692	0.0282768	1	ROBO1	40067268	0	1		LC:NCI_H226 3:118273660-122283060	FALSE	FALSE
	RABL3	285282	RAB, member of RAS oncogene family-like 3	3	120405527	120461384	3q13.33	0.259676	0.0451084	1	ROBO1	40588468	0	1		LC:NCI_H226 3:118273660-122283060	FALSE	FALSE
	GSK3B	2932	glycogen synthase kinase 3 beta	3	119540801	119813264	3q13.33	0.718223	1.04737e-10	1.86568e-06	ROBO1	39723742	0	1		LC:NCI_H226 3:118273660-122283060	FALSE	FALSE
	LRRC58	116064	leucine rich repeat containing 58	3	120043575	120068186	3q13.33	0.639828	3.71823e-08	0.000623584	ROBO1	40226516	0	1		LC:NCI_H226 3:118273660-122283060	FALSE	FALSE
	IQCB1	9657	IQ motif containing B1	3	121488609	121553926	3q13.33	0.521801	1.90663e-05	0.278521	ROBO1	41671550	1	1	RE:RXF_393 3:121383084-122054231	LC:NCI_H226 3:118273660-122283060	FALSE	FALSE
	HCLS1	3059	hematopoietic cell-specific Lyn substrate 1	3	121350245	121379791	3q13.33	-0.0498079	0.705483	1	ROBO1	41533186	0	1		LC:NCI_H226 3:118273660-122283060	FALSE	FALSE
	STXBP5L	9515	syntaxin binding protein 5-like	3	120627049	121143608	3q13.33	0.0107891	0.934793	1	ROBO1	40809990	0	1		LC:NCI_H226 3:118273660-122283060	FALSE	FALSE
	POLQ	10721	polymerase (DNA directed), theta	3	121150272	121264853	3q13.33	0.566677	2.35932e-06	0.036527	ROBO1	41333213	0	1		LC:NCI_H226 3:118273660-122283060	FALSE	FALSE
	KPNA1	3836	karyopherin alpha 1 (importin alpha 5)	3	122140747	122233786	3q21.1	0.750489	5.06751e-12	9.17017e-08	ROBO1	42323688	1	1	OV:OVCAR_3 3:122052003-122651611	LC:NCI_H226 3:118273660-122283060	FALSE	FALSE
	MYLK	4638	myosin light chain kinase	3	123331142	123603149	3q21.1	0.0471579	0.720494	1	SI	41093536	0	1		LC:NCI_H226 3:123376794-124493169	FALSE	FALSE
	KALRN	8997	kalirin, RhoGEF kinase	3	123813557	124440036	3q21.2	0.133094	0.310691	1	SI	40256649	0	1		LC:NCI_H226 3:123376794-124493169	FALSE	FALSE
	ITGB5	3693	integrin, beta 5	3	124481794	124606144	3q21.2	0.271149	0.0361209	1	SI	40090541	0	1		LC:NCI_H226 3:123376794-124493169	FALSE	FALSE
	KIAA1257	57501	KIAA1257	3	128689781	128712986	3q21.3	0.0265895	0.840179	1	SI	35983699	0	1		RE:RXF_393 3:128611912-129300278	FALSE	FALSE
	IFT122	55764	intraflagellar transport 122 homolog (Chlamydomonas)	3	129158967	129239191	3q21.3:3q22.1	0.406524	0.00139851	1	SI	35457494	0	1		RE:RXF_393 3:128611912-129300278	FALSE	FALSE
	TMCC1	23023	transmembrane and coiled-coil domain family 1	3	129366634	129612419	3q22.1	0.200909	0.123747	1	SI	35084266	1	1	RE:RXF_393 3:129310959-129880399	PR:RC01 3:129360480-129444234	FALSE	FALSE
	RPL32P3	132241	ribosomal protein L32 pseudogene 3	3	129101676	129118282	3q21.3	0.592506	6.12382e-07	0.00976321	SI	35578403	0	1		RE:RXF_393 3:128611912-129300278	FALSE	FALSE
	ATP2C1	27032	ATPase, Ca++ transporting, type 2C, member 1	3	130569368	130735555	3q22.1	0.617644	1.46466e-07	0.00240322	SI	33961130	0	1		RE:RXF_393 3:129885957-132231852	FALSE	FALSE
	COL6A6	131873	collagen, type VI, alpha 6	3	130279177	130395888	3q22.1	-0.0271173	0.837049	1	SI	34300797	0	1		RE:RXF_393 3:129885957-132231852	FALSE	FALSE
	COL6A5	256076	collagen, type VI, alpha 5	3	130064358	130203688	3q22.1	-0.200328	0.124858	1	SI	34492997	0	1		RE:RXF_393 3:129885957-132231852	FALSE	FALSE
	NEK11	79858	NIMA (never in mitosis gene a)- related kinase 11	3	130745693	131069309	3q22.1	0.222683	0.0872368	1	SI	33627376	0	1		RE:RXF_393 3:129885957-132231852	FALSE	FALSE
	PIK3R4	30849	phosphoinositide-3-kinase, regulatory subunit 4	3	130397777	130465696	3q22.1	0.752517	4.12532e-12	7.47426e-08	SI	34230989	0	1		RE:RXF_393 3:129885957-132231852	FALSE	FALSE
	CPNE4	131034	copine IV	3	131253576	131753844	3q22.1	0.0882503	0.50253	1	SI	32942841	0	1		RE:RXF_393 3:129885957-132231852	FALSE	FALSE
	MRPL3	11222	mitochondrial ribosomal protein L3	3	131181044	131221860	3q22.1	0.702038	4.1076e-10	7.23882e-06	SI	33474825	0	1		RE:RXF_393 3:129885957-132231852	FALSE	FALSE
	DNAJC13	23317	DnaJ (Hsp40) homolog, subfamily C, member 13	3	132136552	132257876	3q22.1	0.693841	7.93208e-10	1.39002e-05	SI	32438809	0	1		RE:RXF_393 3:129885957-132231852	FALSE	FALSE
	RYK	6259	RYK receptor-like tyrosine kinase	3	133875977	133969586	3q22.2	0.720803	8.3503e-11	1.48944e-06	SI	30727099	0	1		LC:NCI_H226 3:133868598-135683160	FALSE	FALSE
	AMOTL2	51421	angiomotin like 2	3	134074189	134093406	3q22.2	0.172301	0.18803	1	SI	30603279	0	1		LC:NCI_H226 3:133868598-135683160	FALSE	FALSE
	EPHB1	2047	EPH receptor B1	3	134514098	134979307	3q22.2	0.340754	0.00771735	1	SI	29717378	0	1		LC:NCI_H226 3:133868598-135683160	FALSE	FALSE
	KY	339855	kyphoscoliosis peptidase	3	134318764	134369864	3q22.2	0.303875	0.0182549	1	SI	30326821	0	1		LC:NCI_H226 3:133868598-135683160	FALSE	FALSE
	BCHE	590	butyrylcholinesterase	3	165490691	165555253	3q26.1	0.206127	0.114088	1	SI	694408	1	1	LC:NCI_H226 3:165129382-165595924	OV:OVCAR_3 3:163782706-168351730	FALSE	FALSE
	SI	6476	sucrase-isomaltase (alpha-glucosidase)	3	164696685	164796283	3q26.1	0.0735786	0.579697	1	SI	0	0	1		OV:OVCAR_3 3:163782706-168351730	FALSE	FALSE
	ZBBX	79740	zinc finger, B-box domain containing	3	166958076	167098085	3q26.1	0.131623	0.32036	1	SI	2161793	0	1		OV:OVCAR_3 3:163782706-168351730	FALSE	FALSE
	WDR49	151790	WD repeat domain 49	3	167196472	167371289	3q26.1	0.0794468	0.549752	1	SI	2400189	0	1		OV:OVCAR_3 3:163782706-168351730	FALSE	FALSE
	SERPINI1	5274	serpin peptidase inhibitor, clade I (neuroserpin), member 1	3	167453431	167543357	3q26.1	0.199813	0.125852	1	SI	2657148	0	1		OV:OVCAR_3 3:163782706-168351730	FALSE	FALSE
	EGFEM1P	93556	EGF-like and EMI domain containing 1, pseudogene	3	167967309	168548374	3q26.2	0.198392	0.128622	1	SI	3171026	0	1		OV:OVCAR_3 3:163782706-168351730	FALSE	FALSE
	ZMAT3	64393	zinc finger, matrin-type 3	3	178735010	178789656	3q26.32	0.326627	0.0108622	1	SI	13938727	0	1		LC:NCI_H226 3:178238181-178851288	FALSE	FALSE
	LOC100131635	100131635	hCG1645011-like	3	187420153	187450203	3q27.3	-0.014016	0.91609	1	SI	22623870	0	1		BR:T47D 3:186826595-190135738	FALSE	FALSE
	LPP	4026	LIM domain containing preferred translocation partner in lipoma	3	187871662	188608460	3q27.3:3q28	0.373368	0.00329998	1	SI	23075379	0	1		BR:T47D 3:186826595-190135738	FALSE	FALSE
	JAK1	3716	Janus kinase 1	1	65298905	65432187	1p31.3	0.355344	0.00533397	1	JAK1	0	1	0	LC:NCI_H460 1:64300694-67304353		FALSE	FALSE
	TPRG1	285386	tumor protein p63 regulated 1	3	188889762	189041271	3q28	0.133039	0.315136	1	SI	24093479	0	1		BR:T47D 3:186826595-190135738	FALSE	FALSE
	LSG1	55341	large subunit GTPase 1 homolog (S. cerevisiae)	3	194361516	194393206	3q29	0.665325	6.6705e-09	0.000114452	SI	29565233	0	1		BR:BT_549 3:194253651-194454994	FALSE	FALSE
	LRRN1	57633	leucine rich repeat neuronal 1	3	3841120	3889387	3p26.2	0.31544	0.0140877	1	VHL	6293931	0	1		LC:NCI_H226 3:3408360-4151243	FALSE	FALSE
	BHLHE40	8553	basic helix-loop-helix family, member e40	3	5021096	5026865	3p26.1	0.0541973	0.680866	1	VHL	5156453	0	1		OV:OVCAR_3 3:5022526-5603024	FALSE	FALSE
	ARL8B	55207	ADP-ribosylation factor-like 8B	3	5163929	5222601	3p26.1	0.692471	8.83502e-10	1.54719e-05	VHL	4960717	0	1		OV:OVCAR_3 3:5022526-5603024	FALSE	FALSE
	MLH1	4292	mutL homolog 1, colon cancer, nonpolyposis type 2 (E. coli)	3	37034840	37092337	3p22.2	0.657658	1.13769e-08	0.000194067	MLH1	0	0	1		OV:SK_OV_3 3:37059550-37174126	FALSE	FALSE
	LRRFIP2	9209	leucine rich repeat (in FLII) interacting protein 2	3	37094116	37217851	3p22.2	0.534466	1.08947e-05	0.161851	MLH1	1779	0	1		OV:SK_OV_3 3:37059550-37174126	FALSE	FALSE
	ZNF197	10168	zinc finger protein 197	3	44666510	44689963	3p21.31	0.345874	0.00679215	1	SETD2	2367934	0	1		CNS:SNB_19 3:44612980-44847604	FALSE	FALSE
	ZNF660	285349	zinc finger protein 660	3	44626455	44637557	3p21.31	0.206141	0.114061	1	SETD2	2420340	0	1		CNS:SNB_19 3:44612980-44847604	FALSE	FALSE
	ZNF502	91392	zinc finger protein 502	3	44754134	44765323	3p21.31	-0.0469775	0.72152	1	SETD2	2292574	0	1		CNS:SNB_19 3:44612980-44847604	FALSE	FALSE
	KIAA1143	57456	KIAA1143	3	44790235	44803173	3p21.31	0.546121	6.37872e-06	0.0963953	SETD2	2254724	0	1		CNS:SNB_19 3:44612980-44847604	FALSE	FALSE
	ZNF501	115560	zinc finger protein 501	3	44771097	44778575	3p21.31	0.144497	0.270672	1	SETD2	2279322	0	1		CNS:SNB_19 3:44612980-44847604	FALSE	FALSE
	EXOSC7	23016	exosome component 7	3	45017740	45054158	3p21.31	0.574708	1.57036e-06	0.0245462	SETD2	2003739	0	1		LC:NCI_H226 3:44989569-46043945	FALSE	FALSE
	CLEC3B	7123	C-type lectin domain family 3, member B	3	45067758	45077563	3p21.31	0.00189783	0.988618	1	SETD2	1980334	1	1	RE:A498 3:45036875-45244290	LC:NCI_H226 3:44989569-46043945	FALSE	FALSE
	CDCP1	64866	CUB domain containing protein 1	3	45123768	45187914	3p21.31	-0.0106195	0.935816	1	SETD2	1869983	1	1	RE:A498 3:45036875-45244290	LC:NCI_H226 3:44989569-46043945	FALSE	FALSE
	TMEM158	25907	transmembrane protein 158 (gene/pseudogene)	3	45265955	45267814	3p21.31	0.155905	0.234235	1	SETD2	1790083	0	1		LC:NCI_H226 3:44989569-46043945	FALSE	FALSE
	LIMD1	8994	LIM domains containing 1	3	45636322	45722755	3p21.31	0.386151	0.00230878	1	SETD2	1335142	0	1		LC:NCI_H226 3:44989569-46043945	FALSE	FALSE
	SLC6A20	54716	solute carrier family 6 (proline IMINO transporter), member 20	3	45796940	45838035	3p21.31	-0.00512442	0.969003	1	SETD2	1219862	0	1		LC:NCI_H226 3:44989569-46043945	FALSE	FALSE
	CCR9	10803	chemokine (C-C motif) receptor 9	3	45927995	45944667	3p21.31	0.0882056	0.502748	1	SETD2	1113230	0	1		LC:NCI_H226 3:44989569-46043945	FALSE	FALSE
	CXCR6	10663	chemokine (C-X-C motif) receptor 6	3	45984972	45989845	3p21.31	0.139772	0.291046	1	SETD2	1068052	0	1		LC:NCI_H226 3:44989569-46043945	FALSE	FALSE
	PRKAR2A	5576	protein kinase, cAMP-dependent, regulatory, type II, alpha	3	48788092	48885270	3p21.31	0.225016	0.0838899	1	SETD2	1582625	1	1	LC:NCI_H226 3:46052913-50096583	CO:HCT_15 3:48825838-48872527	FALSE	FALSE
	RBM5	10181	RNA binding motif protein 5	3	50126340	50156397	3p21.31	0.656583	1.22458e-08	0.000208694	BAP1	2278627	0	1		LC:NCI_H226 3:50123353-50716570	FALSE	FALSE
	SLC38A3	10991	solute carrier family 38, member 3	3	50242691	50258406	3p21.31	0.141757	0.279958	1	BAP1	2176618	0	1		LC:NCI_H226 3:50123353-50716570	FALSE	FALSE
	IFRD2	7866	interferon-related developmental regulator 2	3	50325162	50330026	3p21.31	0.591263	6.55197e-07	0.010434	BAP1	2104998	0	1		LC:NCI_H226 3:50123353-50716570	FALSE	FALSE
	GNAI2	2771	guanine nucleotide binding protein (G protein), alpha inhibiting activity polypeptide 2	3	50273646	50296786	3p21.31	0.586397	8.51446e-07	0.0134835	BAP1	2138238	0	1		LC:NCI_H226 3:50123353-50716570	FALSE	FALSE
	GNAT1	2779	guanine nucleotide binding protein (G protein), alpha transducing activity polypeptide 1	3	50229042	50235129	3p21.31	-0.0893591	0.50092	1	BAP1	2199895	0	1		LC:NCI_H226 3:50123353-50716570	FALSE	FALSE
	SEMA3B	7869	sema domain, immunoglobulin domain (Ig), short basic domain, secreted, (semaphorin) 3B	3	50305039	50314572	3p21.31	-0.0787738	0.549657	1	BAP1	2120452	0	1		LC:NCI_H226 3:50123353-50716570	FALSE	FALSE
	RASSF1	11186	Ras association (RalGDS/AF-6) domain family member 1	3	50367216	50378367	3p21.31	0.514117	2.64884e-05	0.382889	BAP1	2056657	0	1		LC:NCI_H226 3:50123353-50716570	FALSE	FALSE
	HYAL1	3373	hyaluronoglucosaminidase 1	3	50337319	50349812	3p21.31	-0.0827663	0.529546	1	BAP1	2085212	0	1		LC:NCI_H226 3:50123353-50716570	FALSE	FALSE
	HYAL2	8692	hyaluronoglucosaminidase 2	3	50355220	50360281	3p21.31	0.260343	0.0445398	1	BAP1	2074743	0	1		LC:NCI_H226 3:50123353-50716570	FALSE	FALSE
	CYB561D2	11068	cytochrome b-561 domain containing 2	3	50388296	50391496	3p21.31	0.262025	0.0431324	1	BAP1	2043528	0	1		LC:NCI_H226 3:50123353-50716570	FALSE	FALSE
	NAT6	24142	N-acetyltransferase 6 (GCN5-related)	3	50333832	50336852	3p21.31	-0.0360129	0.786553	1	BAP1	2098172	0	1		LC:NCI_H226 3:50123353-50716570	FALSE	FALSE
	ZMYND10	51364	zinc finger, MYND-type containing 10	3	50378536	50383156	3p21.31	0.114473	0.383799	1	BAP1	2051868	0	1		LC:NCI_H226 3:50123353-50716570	FALSE	FALSE
	NPRL2	10641	nitrogen permease regulator-like 2 (S. cerevisiae)	3	50384918	50388486	3p21.31	0.405508	0.00130775	1	BAP1	2046538	0	1		LC:NCI_H226 3:50123353-50716570	FALSE	FALSE
	TMEM115	11070	transmembrane protein 115	3	50392179	50396939	3p21.31	0.556619	3.87017e-06	0.0592794	BAP1	2038085	0	1		LC:NCI_H226 3:50123353-50716570	FALSE	FALSE
	TUSC2	11334	tumor suppressor candidate 2	3	50362340	50365668	3p21.31	0.535292	1.04962e-05	0.156163	BAP1	2069356	0	1		LC:NCI_H226 3:50123353-50716570	FALSE	FALSE
	HEMK1	51409	HemK methyltransferase family member 1	3	50606908	50622421	3p21.2	0.545205	8.00587e-06	0.120136	BAP1	1812603	0	1		LC:NCI_H226 3:50123353-50716570	FALSE	FALSE
	C3orf18	51161	chromosome 3 open reading frame 18	3	50595455	50608458	3p21.31:3p21.2	0.243093	0.0612676	1	BAP1	1826566	0	1		LC:NCI_H226 3:50123353-50716570	FALSE	FALSE
	MAPKAPK3	7867	mitogen-activated protein kinase-activated protein kinase 3	3	50649292	50686728	3p21.2	0.398191	0.00162766	1	BAP1	1748296	0	1		LC:NCI_H226 3:50123353-50716570	FALSE	FALSE
	CISH	1154	cytokine inducible SH2-containing protein	3	50643884	50649262	3p21.2	-0.168128	0.199115	1	BAP1	1785762	0	1		LC:NCI_H226 3:50123353-50716570	FALSE	FALSE
	SEMA3G	56920	sema domain, immunoglobulin domain (Ig), short basic domain, secreted, (semaphorin) 3G	3	52467267	52479043	3p21.1	0.121604	0.354672	1	BAP1	23258	0	1		LC:NCI_H226 3:52440053-53510920	FALSE	FALSE
	BAP1	8314	BRCA1 associated protein-1 (ubiquitin carboxy-terminal hydrolase)	3	52435024	52444009	3p21.1	0.713753	1.54189e-10	2.73779e-06	BAP1	0	0	1		LC:NCI_H226 3:52440053-53510920	FALSE	FALSE
	NISCH	11188	nischarin	3	52489523	52527088	3p21.1	0.558879	3.4677e-06	0.0532326	BAP1	45514	0	1		LC:NCI_H226 3:52440053-53510920	FALSE	FALSE
	PHF7	51533	PHD finger protein 7	3	52444526	52457657	3p21.1	0.471487	0.000143203	1	BAP1	517	0	1		LC:NCI_H226 3:52440053-53510920	FALSE	FALSE
	TNNC1	7134	troponin C type 1 (slow)	3	52485106	52488057	3p21.1	-0.0393946	0.765057	1	BAP1	41097	0	1		LC:NCI_H226 3:52440053-53510920	FALSE	FALSE
	STAB1	23166	stabilin 1	3	52529355	52558511	3p21.1	-0.0463064	0.727643	1	PBRM1	20856	0	1		LC:NCI_H226 3:52440053-53510920	FALSE	FALSE
	NEK4	6787	NIMA (never in mitosis gene a)-related kinase 4	3	52744795	52804965	3p21.1	0.616316	1.58458e-07	0.00259555	PBRM1	24929	0	1		LC:NCI_H226 3:52440053-53510920	FALSE	FALSE
	GNL3	26354	guanine nucleotide binding protein-like 3 (nucleolar)	3	52719935	52728510	3p21.1	0.602804	4.37095e-07	0.00702237	PBRM1	69	0	1		LC:NCI_H226 3:52440053-53510920	FALSE	FALSE
	GLT8D1	55830	glycosyltransferase 8 domain containing 1	3	52728503	52740048	3p21.1	0.511937	2.90372e-05	0.418629	PBRM1	8637	0	1		LC:NCI_H226 3:52440053-53510920	FALSE	FALSE
	SPCS1	28972	signal peptidase complex subunit 1 homolog (S. cerevisiae)	3	52739856	52742197	3p21.1	0.548577	5.68368e-06	0.086193	PBRM1	19990	0	1		LC:NCI_H226 3:52440053-53510920	FALSE	FALSE
	ITIH4	3700	inter-alpha (globulin) inhibitor H4 (plasma Kallikrein-sensitive glycoprotein)	3	52847005	52864717	3p21.1	-0.0288291	0.826917	1	PBRM1	127139	0	1		LC:NCI_H226 3:52440053-53510920	FALSE	FALSE
	MUSTN1	389125	musculoskeletal, embryonic nuclear protein 1	3	52867130	52869235	3p21.1	0.443976	0.000380376	1	PBRM1	147264	0	1		LC:NCI_H226 3:52440053-53510920	FALSE	FALSE
	ITIH3	3699	inter-alpha (globulin) inhibitor H3	3	52828783	52843025	3p21.1	0.181104	0.166114	1	PBRM1	108917	0	1		LC:NCI_H226 3:52440053-53510920	FALSE	FALSE
	TMEM110	375346	transmembrane protein 110	3	52870771	52931597	3p21.1	0.627617	1.0379e-07	0.00171109	PBRM1	150905	0	1		LC:NCI_H226 3:52440053-53510920	FALSE	FALSE
	RFT1	91869	RFT1 homolog (S. cerevisiae)	3	53122500	53164470	3p21.1	0.504977	3.87683e-05	0.554077	PBRM1	402634	0	1		LC:NCI_H226 3:52440053-53510920	FALSE	FALSE
	TKT	7086	transketolase	3	53258722	53290130	3p21.1	0.373833	0.00325814	1	PBRM1	538856	0	1		LC:NCI_H226 3:52440053-53510920	FALSE	FALSE
	FEZF2	55079	FEZ family zinc finger 2	3	62355346	62359190	3p14.2	-0.267018	0.0427409	1	PBRM1	9635480	0	1		OV:NCI_ADR_RES 3:62124583-65994050	FALSE	FALSE
	C3orf14	57415	chromosome 3 open reading frame 14	3	62305395	62319320	3p14.2	0.59256	6.10594e-07	0.00973531	PBRM1	9585529	0	1		OV:NCI_ADR_RES 3:62124583-65994050	FALSE	FALSE
	SNTN	132203	sentan, cilia apical structure protein	3	63638343	63650891	3p14.2	0.522204	1.87363e-05	0.273776	PBRM1	10918477	2	1	ME:UACC_62 3:62921398-66659418,OV:OVCAR_3 3:63398484-64339061	OV:NCI_ADR_RES 3:62124583-65994050	FALSE	FALSE
	LOC100287879	100287879	hypothetical LOC100287879	3	64064036	64073039	3p14.1	0.050253	0.705445	1	PBRM1	11344170	3	1	BR:MCF7 3:63990825-64947927,ME:UACC_62 3:62921398-66659418,OV:OVCAR_3 3:63398484-64339061	OV:NCI_ADR_RES 3:62124583-65994050	FALSE	FALSE
	PSMD6	9861	proteasome (prosome, macropain) 26S subunit, non-ATPase, 6	3	63996224	64009686	3p14.1	0.908377	1.24718e-23	2.30741e-19	PBRM1	11276358	3	1	BR:MCF7 3:63990825-64947927,ME:UACC_62 3:62921398-66659418,OV:OVCAR_3 3:63398484-64339061	OV:NCI_ADR_RES 3:62124583-65994050	FALSE	FALSE
	C3orf30	152405	chromosome 3 open reading frame 30	3	118864996	118870302	3q13.32	-0.163229	0.220846	1	ROBO1	39047937	0	1		LC:NCI_H226 3:118273660-122283060	FALSE	FALSE
	UPK1B	7348	uroplakin 1B	3	118892424	118924000	3q13.32	0.0604968	0.646112	1	ROBO1	39075365	0	1		LC:NCI_H226 3:118273660-122283060	FALSE	FALSE
	B4GALT4	8702	UDP-Gal:betaGlcNAc beta 1,4- galactosyltransferase, polypeptide 4	3	118930588	118959752	3q13.32	0.478551	0.000109927	1	ROBO1	39113529	0	1		LC:NCI_H226 3:118273660-122283060	FALSE	FALSE
	POGLUT1	56983	protein O-glucosyltransferase 1	3	119187784	119213554	3q13.33	0.564209	2.66798e-06	0.0411695	ROBO1	39370725	0	1		LC:NCI_H226 3:118273660-122283060	FALSE	FALSE
	TMEM39A	55254	transmembrane protein 39A	3	119147806	119182529	3q13.33	0.733329	2.67842e-11	4.80723e-07	ROBO1	39330747	0	1		LC:NCI_H226 3:118273660-122283060	FALSE	FALSE
	PLA1A	51365	phospholipase A1 member A	3	119316694	119348658	3q13.33	0.197052	0.131276	1	ROBO1	39499635	0	1		LC:NCI_H226 3:118273660-122283060	FALSE	FALSE
	COX17	10063	COX17 cytochrome c oxidase assembly homolog (S. cerevisiae)	3	119388371	119396243	3q13.33	0.703389	5.21763e-10	9.17676e-06	ROBO1	39571312	0	1		LC:NCI_H226 3:118273660-122283060	FALSE	FALSE
	POPDC2	64091	popeye domain containing 2	3	119360907	119379404	3q13.33	0.422975	0.000760008	1	ROBO1	39543848	0	1		LC:NCI_H226 3:118273660-122283060	FALSE	FALSE
	ADPRH	141	ADP-ribosylarginine hydrolase	3	119298522	119308792	3q13.33	0.255901	0.0484386	1	ROBO1	39481463	0	1		LC:NCI_H226 3:118273660-122283060	FALSE	FALSE
	NR1I2	8856	nuclear receptor subfamily 1, group I, member 2	3	119499330	119537332	3q13.33	0.535938	1.21717e-05	0.180226	ROBO1	39682271	0	1		LC:NCI_H226 3:118273660-122283060	FALSE	FALSE
	FSTL1	11167	follistatin-like 1	3	120113060	120169918	3q13.33	0.0932384	0.478588	1	ROBO1	40296001	0	1		LC:NCI_H226 3:118273660-122283060	FALSE	FALSE
	NDUFB4	4710	NADH dehydrogenase (ubiquinone) 1 beta subcomplex, 4, 15kDa	3	120315127	120321258	3q13.33	0.635539	6.38354e-08	0.00106139	ROBO1	40498068	0	1		LC:NCI_H226 3:118273660-122283060	FALSE	FALSE
	HGD	3081	homogentisate 1,2-dioxygenase	3	120347014	120401418	3q13.33	0.0352829	0.788981	1	ROBO1	40529955	0	1		LC:NCI_H226 3:118273660-122283060	FALSE	FALSE
	GTF2E1	2960	general transcription factor IIE, polypeptide 1, alpha 56kDa	3	120461557	120501916	3q13.33	0.672779	3.91038e-09	6.75128e-05	ROBO1	40644498	0	1		LC:NCI_H226 3:118273660-122283060	FALSE	FALSE
	FBXO40	51725	F-box protein 40	3	121312169	121349139	3q13.33	0.392084	0.00213196	1	ROBO1	41495110	0	1		LC:NCI_H226 3:118273660-122283060	FALSE	FALSE
	GOLGB1	2804	golgin B1	3	121382045	121468614	3q13.33	0.665616	6.5351e-09	0.000112175	ROBO1	41564986	0	1		LC:NCI_H226 3:118273660-122283060	FALSE	FALSE
	EAF2	55840	ELL associated factor 2	3	121554033	121605373	3q13.33	0.185996	0.154777	1	ROBO1	41736974	1	1	RE:RXF_393 3:121383084-122054231	LC:NCI_H226 3:118273660-122283060	FALSE	FALSE
	ILDR1	286676	immunoglobulin-like domain containing receptor 1	3	121706169	121741127	3q13.33	0.113908	0.386164	1	ROBO1	41889110	1	1	RE:RXF_393 3:121383084-122054231	LC:NCI_H226 3:118273660-122283060	FALSE	FALSE
	CD86	942	CD86 molecule	3	121774208	121839988	3q13.33	0.00872652	0.947239	1	ROBO1	41957149	1	1	RE:RXF_393 3:121383084-122054231	LC:NCI_H226 3:118273660-122283060	FALSE	FALSE
	CASR	846	calcium-sensing receptor	3	121902529	122005344	3q21.1	-0.227183	0.0835603	1	ROBO1	42085470	1	1	RE:RXF_393 3:121383084-122054231	LC:NCI_H226 3:118273660-122283060	FALSE	FALSE
	CSTA	1475	cystatin A (stefin A)	3	122044010	122060815	3q21.1	-0.0188982	0.886039	1	ROBO1	42226951	0	1		LC:NCI_H226 3:118273660-122283060	FALSE	FALSE
	FAM162A	26355	family with sequence similarity 162, member A	3	122103022	122128961	3q21.1	0.581779	1.08745e-06	0.0171231	ROBO1	42285963	1	1	OV:OVCAR_3 3:122052003-122651611	LC:NCI_H226 3:118273660-122283060	FALSE	FALSE
	WDR5B	54554	WD repeat domain 5B	3	122130699	122134882	3q21.1	0.707729	2.56723e-10	4.53911e-06	ROBO1	42313640	1	1	OV:OVCAR_3 3:122052003-122651611	LC:NCI_H226 3:118273660-122283060	FALSE	FALSE
	CCDC58	131076	coiled-coil domain containing 58	3	122078435	122102074	3q21.1	0.630126	6.86314e-08	0.0011399	ROBO1	42261376	1	1	OV:OVCAR_3 3:122052003-122651611	LC:NCI_H226 3:118273660-122283060	FALSE	FALSE
	PARP9	83666	poly (ADP-ribose) polymerase family, member 9	3	122246759	122283523	3q21.1	0.341397	0.00759546	1	SI	42413162	1	1	OV:OVCAR_3 3:122052003-122651611	LC:NCI_H226 3:118273660-122283060	FALSE	FALSE
	ROPN1	54763	rhophilin associated tail protein 1	3	123687878	123710199	3q21.1	0.283808	0.027983	1	SI	40986486	0	1		LC:NCI_H226 3:123376794-124493169	FALSE	FALSE
	CCDC14	64770	coiled-coil domain containing 14	3	123632273	123680255	3q21.1	0.540587	8.24527e-06	0.12358	SI	41016430	0	1		LC:NCI_H226 3:123376794-124493169	FALSE	FALSE
	UMPS	7372	uridine monophosphate synthetase	3	124449212	124468119	3q21.2	0.711994	1.79179e-10	3.17863e-06	SI	40228566	0	1		LC:NCI_H226 3:123376794-124493169	FALSE	FALSE
	ACAD9	28976	acyl-CoA dehydrogenase family, member 9	3	128598332	128631957	3q21.3	0.739029	1.563e-11	2.81294e-07	SI	36064728	0	1		RE:RXF_393 3:128611912-129300278	FALSE	FALSE
	RAB43	339122	RAB43, member RAS oncogene family	3	128806411	128840993	3q21.3	0.32868	0.0110326	1	SI	35855692	0	1		RE:RXF_393 3:128611912-129300278	FALSE	FALSE
	ISY1	57461	ISY1 splicing factor homolog (S. cerevisiae)	3	128846258	128880073	3q21.3	0.735442	2.19712e-11	3.948e-07	SI	35816612	0	1		RE:RXF_393 3:128611912-129300278	FALSE	FALSE
	CNBP	7555	CCHC-type zinc finger, nucleic acid binding protein	3	128886657	128902810	3q21.3	0.684717	1.60908e-09	2.80334e-05	SI	35793875	0	1		RE:RXF_393 3:128611912-129300278	FALSE	FALSE
	C3orf37	56941	chromosome 3 open reading frame 37	3	128997683	129024135	3q21.3	0.530449	1.3043e-05	0.192723	SI	35672550	0	1		RE:RXF_393 3:128611912-129300278	FALSE	FALSE
	H1FX	8971	H1 histone family, member X	3	129033613	129035120	3q21.3	0.167902	0.199726	1	SI	35661565	0	1		RE:RXF_393 3:128611912-129300278	FALSE	FALSE
	MBD4	8930	methyl-CpG binding domain protein 4	3	129149786	129159022	3q21.3	0.576332	1.44441e-06	0.0226078	SI	35537663	0	1		RE:RXF_393 3:128611912-129300278	FALSE	FALSE
	SNORA7B	677797	small nucleolar RNA, H/ACA box 7B	3	129116052	129116191	3q21.3	0.376754	0.00326945	1	SI	35580494	0	1		RE:RXF_393 3:128611912-129300278	FALSE	FALSE
	H1FOO	132243	H1 histone family, member O, oocyte-specific	3	129262056	129270204	3q22.1	0.060678	0.645123	1	SI	35426481	0	1		RE:RXF_393 3:128611912-129300278	FALSE	FALSE
	RHO	6010	rhodopsin	3	129247481	129254187	3q22.1	-0.214639	0.102577	1	SI	35442498	0	1		RE:RXF_393 3:128611912-129300278	FALSE	FALSE
	PLXND1	23129	plexin D1	3	129274055	129325582	3q22.1	0.000195854	0.998815	1	SI	35371103	0	1		RE:RXF_393 3:128611912-129300278	FALSE	FALSE
	COL6A4P2	646300	collagen, type VI, alpha 4 pseudogene 2	3	129931662	129992649	3q22.1	-0.146677	0.267625	1	SI	34704036	0	1		RE:RXF_393 3:129885957-132231852	FALSE	FALSE
	ASTE1	28990	asteroid homolog 1 (Drosophila)	3	130732720	130745646	3q22.1	0.644924	2.67138e-08	0.000450395	SI	33951039	0	1		RE:RXF_393 3:129885957-132231852	FALSE	FALSE
	NUDT16	131870	nudix (nucleoside diphosphate linked moiety X)-type motif 16	3	131100514	131107674	3q22.1	0.59007	6.98939e-07	0.0111117	SI	33589011	0	1		RE:RXF_393 3:129885957-132231852	FALSE	FALSE
	NUDT16P1	152195	nudix (nucleoside diphosphate linked moiety X)-type motif 16 pseudogene 1	3	131080688	131083966	3q22.1	-0.110535	0.400476	1	SI	33612719	0	1		RE:RXF_393 3:129885957-132231852	FALSE	FALSE
	SNORA58	677836	small nucleolar RNA, H/ACA box 58	3	131197841	131198077	3q22.1	0.515947	2.8843e-05	0.415887	SI	33498608	0	1		RE:RXF_393 3:129885957-132231852	FALSE	FALSE
	ACPP	55	acid phosphatase, prostate	3	132036210	132087146	3q22.1	0.157289	0.230057	1	SI	32609539	0	1		RE:RXF_393 3:129885957-132231852	FALSE	FALSE
	ANAPC13	25847	anaphase promoting complex subunit 13	3	134196545	134204865	3q22.2	0.578426	1.29582e-06	0.0203328	SI	30491820	0	1		LC:NCI_H226 3:133868598-135683160	FALSE	FALSE
	SLITRK3	22865	SLIT and NTRK-like family, member 3	3	164904507	164914469	3q26.1	0.216216	0.100017	1	SI	108224	0	1		OV:OVCAR_3 3:163782706-168351730	FALSE	FALSE
	SERPINI2	5276	serpin peptidase inhibitor, clade I (pancpin), member 2	3	167159576	167191920	3q26.1	-0.00862668	0.948296	1	SI	2363293	0	1		OV:OVCAR_3 3:163782706-168351730	FALSE	FALSE
	PDCD10	11235	programmed cell death 10	3	167401694	167452651	3q26.1	0.876456	4.60405e-20	8.51564e-16	SI	2605411	0	1		OV:OVCAR_3 3:163782706-168351730	FALSE	FALSE
	EIF5A2	56648	eukaryotic translation initiation factor 5A2	3	170606203	170626426	3q26.2	0.109076	0.406764	1	SI	5809920	0	1		LC:NCI_H226 3:170397921-170979106	FALSE	FALSE
	RPL22L1	200916	ribosomal protein L22-like 1	3	170582664	170588045	3q26.2	-0.191881	0.141908	1	SI	5786381	0	1		LC:NCI_H226 3:170397921-170979106	FALSE	FALSE
	SLC2A2	6514	solute carrier family 2 (facilitated glucose transporter), member 2	3	170714136	170744768	3q26.2	-0.0525025	0.690334	1	SI	5917853	0	1		LC:NCI_H226 3:170397921-170979106	FALSE	FALSE
	RPL39L	116832	ribosomal protein L39-like	3	186838740	186857263	3q27.3	0.253911	0.0523153	1	SI	22042457	0	1		BR:T47D 3:186826595-190135738	FALSE	FALSE
	MASP1	5648	mannan-binding lectin serine peptidase 1 (C4/C2 activating component of Ra-reactive factor)	3	186933872	187009810	3q27.3	-0.0980348	0.460095	1	SI	22137589	0	1		BR:T47D 3:186826595-190135738	FALSE	FALSE
	RTP1	132112	receptor (chemosensory) transporter protein 1	3	186915273	186919253	3q27.3	0.169387	0.195721	1	SI	22118990	0	1		BR:T47D 3:186826595-190135738	FALSE	FALSE
	RTP4	64108	receptor (chemosensory) transporter protein 4	3	187086167	187089369	3q27.3	0.22215	0.0880156	1	SI	22289884	0	1		BR:T47D 3:186826595-190135738	FALSE	FALSE
	RTP2	344892	receptor (chemosensory) transporter protein 2	3	187416046	187420345	3q27.3	-0.060363	0.64972	1	SI	22619763	0	1		BR:T47D 3:186826595-190135738	FALSE	FALSE
	BCL6	604	B-cell CLL/lymphoma 6	3	187439164	187463513	3q27.3	0.28648	0.0264783	1	SI	22642881	0	1		BR:T47D 3:186826595-190135738	FALSE	FALSE
	CLDN1	9076	claudin 1	3	190023489	190040235	3q28	-0.0781477	0.552844	1	SI	25227206	0	1		BR:T47D 3:186826595-190135738	FALSE	FALSE
	CLDN16	10686	claudin 16	3	190105660	190129932	3q28	-0.113032	0.389855	1	SI	25309377	0	1		BR:T47D 3:186826595-190135738	FALSE	FALSE
	TMEM44	93109	transmembrane protein 44	3	194308401	194354150	3q29	0.232389	0.0739767	1	SI	29512118	0	1		BR:BT_549 3:194253651-194454994	FALSE	FALSE
	FAM43A	131583	family with sequence similarity 43, member A	3	194406621	194409766	3q29	0.340303	0.00780397	1	SI	29610338	0	1		BR:BT_549 3:194253651-194454994	FALSE	FALSE
	TMEM33	55161	transmembrane protein 33	4	41937136	41962824	4p13	0.374142	0.00323068	1	PHOX2B	186149	0	1		ME:MALME_3M 4:41147769-42455472	FALSE	FALSE
	APBB2	323	amyloid beta (A4) precursor protein-binding, family B, member 2	4	40812043	41216635	4p14:4p13	0.102255	0.436897	1	PHOX2B	529463	0	1		ME:MALME_3M 4:41147769-42455472	FALSE	FALSE
	PDS5A	23244	PDS5, regulator of cohesion maintenance, homolog A (S. cerevisiae)	4	39824482	39979576	4p14	0.68824	1.22824e-09	2.145e-05	PHOX2B	1766522	0	1		CNS:SF_539 4:39824783-40170126	FALSE	FALSE
	PDLIM5	10611	PDZ and LIM domain 5	4	95373007	95589378	4q22.3	0.14144	0.281047	1	TET2	10477653	0	1		ME:SK_MEL_2 4:95489666-96193972	FALSE	FALSE
	UNC5C	8633	unc-5 homolog C (C. elegans)	4	96083655	96470361	4q22.3	0.0232274	0.86017	1	TET2	9596670	0	1		ME:SK_MEL_2 4:95489666-96193972	FALSE	FALSE
	GALNTL6	442117	UDP-N-acetyl-alpha-D-galactosamine:polypeptide N-acetylgalactosaminyltransferase-like 6	4	172734574	173961558	4q34.1	0.067402	0.611997	1	FBXW7	19278181	0	1		LC:EKVX 4:172935916-173417494	FALSE	FALSE
	N4BP2	55728	NEDD4 binding protein 2	4	40058523	40159872	4p14	0.424248	0.000729689	1	PHOX2B	1586226	0	1		CNS:SF_539 4:39824783-40170126	FALSE	FALSE
	LIMCH1	22998	LIM and calponin homology domains 1	4	41362803	41702061	4p13	0.161365	0.218052	1	PHOX2B	44037	0	1		ME:MALME_3M 4:41147769-42455472	FALSE	FALSE
	ATP8A1	10396	ATPase, aminophospholipid transporter (APLT), class I, type 8A, member 1	4	42410391	42659122	4p13	0.169774	0.194686	1	PHOX2B	659404	0	1		ME:MALME_3M 4:41147769-42455472	FALSE	FALSE
	SLC30A9	10463	solute carrier family 30 (zinc transporter), member 9	4	41992522	42089551	4p13	0.587998	7.81498e-07	0.0123992	PHOX2B	241535	0	1		ME:MALME_3M 4:41147769-42455472	FALSE	FALSE
	GABRA2	2555	gamma-aminobutyric acid (GABA) A receptor, alpha 2	4	46251580	46392056	4p12	0.0716502	0.586424	1	PHOX2B	4500593	0	1		CNS:SF_539 4:44828678-46452977	FALSE	FALSE
	SPATA18	132671	spermatogenesis associated 18 homolog (rat)	4	52917592	52963458	4q12	-0.0117437	0.929038	1	PHOX2B	11166605	0	1		OV:NCI_ADR_RES 4:52692586-53298365	FALSE	FALSE
	BMPR1B	658	bone morphogenetic protein receptor, type IB	4	95679127	96079601	4q22.3	-0.0526567	0.68947	1	TET2	9987430	0	1		ME:SK_MEL_2 4:95489666-96193972	FALSE	FALSE
	SEC24B	10427	SEC24 family, member B (S. cerevisiae)	4	110354970	110461615	4q25	0.724782	5.85805e-11	1.04695e-06	TET2	4154010	0	1		LC:HOP_92 4:110317488-110426269	FALSE	FALSE
	ANAPC10	10393	anaphase promoting complex subunit 10	4	145915726	146019693	4q31.21	0.612067	2.03355e-07	0.00331795	FBXW7	7222716	0	1		RE:786_0 4:145911211-146461957	FALSE	FALSE
	SMAD1	4086	SMAD family member 1	4	146402950	146480325	4q31.21	0.211523	0.104719	1	FBXW7	6762084	0	1		RE:786_0 4:145911211-146461957	FALSE	FALSE
	LRBA	987	LPS-responsive vesicle trafficking, beach and anchor containing	4	151185810	151936649	4q31.3	0.406958	0.0012515	1	FBXW7	1305760	0	1		LC:NCI_H322M 4:151277581-151774101	FALSE	FALSE
	KLHL2	11275	kelch-like 2, Mayven (Drosophila)	4	166128769	166244308	4q32.3	0.350898	0.00598022	1	FBXW7	12672376	0	1		LC:EKVX 4:165671272-166528645	FALSE	FALSE
	GK3P	2713	glycerol kinase 3 pseudogene	4	166198943	166201175	4q32.3	0.129011	0.325899	1	FBXW7	12742550	0	1		LC:EKVX 4:165671272-166528645	FALSE	FALSE
	CPE	1363	carboxypeptidase E	4	166300096	166419482	4q32.3	0.0988732	0.45229	1	FBXW7	12843703	0	1		LC:EKVX 4:165671272-166528645	FALSE	FALSE
	GLRA3	8001	glycine receptor, alpha 3	4	175563197	175750465	4q34.1	0.0522635	0.694229	1	FBXW7	22106804	0	1		CNS:SF_295 4:175398802-175610455	FALSE	FALSE
	ENPP6	133121	ectonucleotide pyrophosphatase/phosphodiesterase 6	4	185009858	185139114	4q35.1	0.175068	0.180927	1	FBXW7	31553465	0	1		CO:HCT_116 4:184331386-185678439	FALSE	FALSE
	ACSL1	2180	acyl-CoA synthetase long-chain family member 1	4	185676748	185747215	4q35.1	0.357586	0.00503205	1	FBXW7	32220355	0	1		CO:HCT_116 4:184331386-185678439	FALSE	FALSE
	FAT1	2195	FAT tumor suppressor homolog 1 (Drosophila)	4	187508936	187644987	4q35.2	0.317955	0.0132984	1	FBXW7	34052543	0	1		RE:RXF_393 4:187598843-187866763	FALSE	FALSE
	LOC344967	344967	acyl-CoA thioesterase 7 pseudogene	4	40044536	40058819	4p14	0.222228	0.0907088	1	PHOX2B	1687279	0	1		CNS:SF_539 4:39824783-40170126	FALSE	FALSE
	UCHL1	7345	ubiquitin carboxyl-terminal esterase L1 (ubiquitin thiolesterase)	4	41258897	41270446	4p13	0.138634	0.290796	1	PHOX2B	475652	0	1		ME:MALME_3M 4:41147769-42455472	FALSE	FALSE
	PHOX2B	8929	paired-like homeobox 2b	4	41746098	41750987	4p13	0.210387	0.109733	1	PHOX2B	0	0	1		ME:MALME_3M 4:41147769-42455472	FALSE	FALSE
	DCAF4L1	285429	DDB1 and CUL4 associated factor 4-like 1	4	41983712	41988484	4p13	0.128402	0.332449	1	PHOX2B	232725	0	1		ME:MALME_3M 4:41147769-42455472	FALSE	FALSE
	BEND4	389206	BEN domain containing 4	4	42112869	42154895	4p13	0.101467	0.440456	1	PHOX2B	361882	0	1		ME:MALME_3M 4:41147769-42455472	FALSE	FALSE
	SHISA3	152573	shisa homolog 3 (Xenopus laevis)	4	42399855	42404504	4p13	-0.0566091	0.667478	1	PHOX2B	648868	0	1		ME:MALME_3M 4:41147769-42455472	FALSE	FALSE
	GABRG1	2565	gamma-aminobutyric acid (GABA) A receptor, gamma 1	4	46037786	46126082	4p12	0.0520266	0.693	1	PHOX2B	4286799	0	1		CNS:SF_539 4:44828678-46452977	FALSE	FALSE
	DCUN1D4	23142	DCN1, defective in cullin neddylation 1, domain containing 4 (S. cerevisiae)	4	52709275	52783003	4q12	0.505192	3.84279e-05	0.549442	PHOX2B	10958288	0	1		OV:NCI_ADR_RES 4:52692586-53298365	FALSE	FALSE
	SGCB	6443	sarcoglycan, beta (43kDa dystrophin-associated glycoprotein)	4	52886860	52904485	4q12	0.283162	0.0283576	1	PHOX2B	11135873	0	1		OV:NCI_ADR_RES 4:52692586-53298365	FALSE	FALSE
	LRRC66	339977	leucine rich repeat containing 66	4	52859865	52883786	4q12	0.152932	0.243387	1	PHOX2B	11108878	0	1		OV:NCI_ADR_RES 4:52692586-53298365	FALSE	FALSE
	OTUD4	54726	OTU domain containing 4	4	146054801	146100832	4q31.21	0.577767	1.65632e-06	0.0258601	FBXW7	7141577	0	1		RE:786_0 4:145911211-146461957	FALSE	FALSE
	ABCE1	6059	ATP-binding cassette, sub-family E (OABP), member 1	4	146019155	146050676	4q31.21	0.624264	9.83878e-08	0.00162301	FBXW7	7191733	0	1		RE:786_0 4:145911211-146461957	FALSE	FALSE
	MAB21L2	10586	mab-21-like 2 (C. elegans)	4	151503076	151505845	4q31.3	0.184252	0.162421	1	FBXW7	1736564	0	1		LC:NCI_H322M 4:151277581-151774101	FALSE	FALSE
	TRIM61	391712	tripartite motif containing 61	4	165875597	165898818	4q32.3	0.11255	0.396041	1	FBXW7	12419204	0	1		LC:EKVX 4:165671272-166528645	FALSE	FALSE
	TMEM192	201931	transmembrane protein 192	4	165997229	166034024	4q32.3	0.530094	1.32505e-05	0.195723	FBXW7	12540836	0	1		LC:EKVX 4:165671272-166528645	FALSE	FALSE
	HPGD	3248	hydroxyprostaglandin dehydrogenase 15-(NAD)	4	175411327	175444049	4q34.1	0.0770386	0.55851	1	FBXW7	21954934	0	1		CNS:SF_295 4:175398802-175610455	FALSE	FALSE
	VEGFC	7424	vascular endothelial growth factor C	4	177604690	177713895	4q34.3	-0.157265	0.230128	1	FBXW7	24148297	0	1		BR:BT_549 4:176122346-179727494	FALSE	FALSE
	CDKN2AIP	55602	CDKN2A interacting protein	4	184365788	184369049	4q35.1	0.713273	2.31151e-10	4.09137e-06	FBXW7	30909395	0	1		CO:HCT_116 4:184331386-185678439	FALSE	FALSE
	ING2	3622	inhibitor of growth family, member 2	4	184426219	184432249	4q35.1	0.638249	4.11416e-08	0.000688998	FBXW7	30969826	0	1		CO:HCT_116 4:184331386-185678439	FALSE	FALSE
	RWDD4	201965	RWD domain containing 4	4	184560788	184580331	4q35.1	0.141572	0.280592	1	FBXW7	31104395	0	1		CO:HCT_116 4:184331386-185678439	FALSE	FALSE
	STOX2	56977	storkhead box 2	4	184826508	184938875	4q35.1	0.0748925	0.569552	1	FBXW7	31370115	0	1		CO:HCT_116 4:184331386-185678439	FALSE	FALSE
	MLF1IP	79682	MLF1 interacting protein	4	185615218	185655286	4q35.1	0.530554	1.2982e-05	0.191887	FBXW7	32158825	0	1		CO:HCT_116 4:184331386-185678439	FALSE	FALSE
	CDH18	1016	cadherin 18, type 2	5	19473154	19988353	5p14.3	-0.202474	0.120787	1	MAST4	45903822	0	1		PR:PC_3 5:19847325-19954320	FALSE	FALSE
	SGTB	54557	small glutamine-rich tetratricopeptide repeat (TPR)-containing, beta	5	64961754	65017941	5q12.3	0.403306	0.0013975	1	MAST4	874234	0	1		PR:PC_3 5:64713749-66130058	FALSE	FALSE
	MAST4	375449	microtubule associated serine/threonine kinase family member 4	5	65892175	66465423	5q12.3	0.0264542	0.840982	1	MAST4	0	0	1		PR:PC_3 5:64713749-66130058	FALSE	FALSE
	FAM172A	83989	family with sequence similarity 172, member A	5	92953430	93447404	5q15	0.389487	0.00209834	1	APC	18595797	0	1		PR:PC_3 5:93313737-94878238	FALSE	FALSE
	MCTP1	79772	multiple C2 domains, transmembrane 1	5	94042288	94620279	5q15	0.184056	0.159203	1	APC	17422922	0	1		PR:PC_3 5:93313737-94878238	FALSE	FALSE
	EFNA5	1946	ephrin-A5	5	106712589	107006596	5q21.3	0.326592	0.0108713	1	APC	5036605	0	1		RE:RXF_393 5:106824360-106962760	FALSE	FALSE
	FAM13B	51306	family with sequence similarity 13, member B	5	137273641	137368802	5q31.2	0.491892	6.56514e-05	0.921154	CTNNA1	720304	0	1		OV:SK_OV_3 5:135741850-137719205	FALSE	FALSE
	SIL1	64374	SIL1 homolog, endoplasmic reticulum chaperone (S. cerevisiae)	5	138282409	138534065	5q31.2	0.457541	0.000237408	1	CTNNA1	11686	0	1		PR:PC_3 5:138157532-138312551	FALSE	FALSE
	SPOCK1	6695	sparc/osteonectin, cwcv and kazal-like domains proteoglycan (testican) 1	5	136310986	136835018	5q31.2	0.192705	0.140171	1	CTNNA1	1254088	0	1		OV:SK_OV_3 5:135741850-137719205	FALSE	FALSE
	HTR4	3360	5-hydroxytryptamine (serotonin) receptor 4	5	147830594	148033739	5q32	-0.0760619	0.563523	1	CTNNA1	9559871	0	1		RE:TK_10 5:146278838-148075488	FALSE	FALSE
	LARP1	23367	La ribonucleoprotein domain family, member 1	5	154092461	154197163	5q33.2	0.531666	1.2354e-05	0.182815	CTNNA1	15821738	0	1		RE:RXF_393 5:154167572-154340247	FALSE	FALSE
	KCNIP1	30820	Kv channel interacting protein 1	5	169780880	170163636	5q35.1	0.0944057	0.473075	1	NPM1	651071	0	1		PR:PC_3 5:169338727-170581284	FALSE	FALSE
	HRH2	3274	histamine receptor H2	5	175085039	175113245	5q35.2	-0.142101	0.27878	1	NPM1	4247151	0	1		PR:PC_3 5:173759187-175271868	FALSE	FALSE
	AHRR	57491	aryl-hydrocarbon receptor repressor	5	304290	438405	5p15.33	0.172514	0.187476	1	MAST4	65453770	0	1		RE:RXF_393 5:188789-570728	FALSE	FALSE
	SLC9A3	6550	solute carrier family 9 (sodium/hydrogen exchanger), member 3	5	473333	524549	5p15.33	0.0428749	0.747127	1	MAST4	65367626	0	1		RE:RXF_393 5:188789-570728	FALSE	FALSE
	SLC6A3	6531	solute carrier family 6 (neurotransmitter transporter, dopamine), member 3	5	1392904	1445543	5p15.33	0.0485181	0.715174	1	MAST4	64446632	0	1		RE:RXF_393 5:1323208-1527624	FALSE	FALSE
	PPWD1	23398	peptidylprolyl isomerase domain and WD repeat containing 1	5	64859062	64883376	5q12.3	0.601819	4.61612e-07	0.00740517	MAST4	1008799	0	1		PR:PC_3 5:64713749-66130058	FALSE	FALSE
	ADAMTS6	11174	ADAM metallopeptidase with thrombospondin type 1 motif, 6	5	64444562	64777704	5q12.3	0.00819277	0.950462	1	MAST4	1114471	0	1		PR:PC_3 5:64713749-66130058	FALSE	FALSE
	ERBB2IP	55914	erbb2 interacting protein	5	65222381	65376851	5q12.3	0.398268	0.00162398	1	MAST4	515324	0	1		PR:PC_3 5:64713749-66130058	FALSE	FALSE
	GUSBP3	653188	glucuronidase, beta pseudogene 3	5	68935289	69006272	5q13.2	0.158456	0.226573	1	PIK3R1	1337640	0	1		BR:BT_549 5:68802340-70800563	FALSE	FALSE
	SERF1B	728492	small EDRK-rich factor 1B (centromeric)	5	69321077	70214351	5q13.2	0.341819	0.00751625	1	PIK3R1	1723428	0	1		BR:BT_549 5:68802340-70800563	FALSE	FALSE
	GTF2H2B	653238	general transcription factor IIH, polypeptide 2B	5	69711196	69746189	5q13.2	0.104292	0.431814	1	PIK3R1	2113547	0	1		BR:BT_549 5:68802340-70800563	FALSE	FALSE
	SMA5	11042	glucuronidase, beta pseudogene	5	69776869	69881549	5q13.2	0.207172	0.112223	1	PIK3R1	2179220	0	1		BR:BT_549 5:68802340-70800563	FALSE	FALSE
	SERF1A	8293	small EDRK-rich factor 1A (telomeric)	5	69321071	70214357	5q13.2	0.362105	0.00482946	1	PIK3R1	1723422	0	1		BR:BT_549 5:68802340-70800563	FALSE	FALSE
	SMA4	11039	glucuronidase, beta pseudogene	5	69423288	69586004	5q13.2	0.131365	0.317074	1	PIK3R1	1825639	0	1		BR:BT_549 5:68802340-70800563	FALSE	FALSE
	BDP1	55814	B double prime 1, subunit of RNA polymerase III transcription initiation factor IIIB	5	70751441	70863649	5q13.2	0.44479	0.00041628	1	PIK3R1	3153792	0	1		BR:BT_549 5:68802340-70800563	FALSE	FALSE
	EDIL3	10085	EGF-like repeats and discoidin I-like domains 3	5	83238125	83680611	5q14.3	-0.0853593	0.516683	1	PIK3R1	15640476	0	1		PR:PC_3 5:82932072-84332595	FALSE	FALSE
	HAPLN1	1404	hyaluronan and proteoglycan link protein 1	5	82934016	83016896	5q14.3	-0.149555	0.254077	1	PIK3R1	15336367	0	1		PR:PC_3 5:82932072-84332595	FALSE	FALSE
	ANKRD32	84250	ankyrin repeat domain 32	5	93954390	94031573	5q15	0.556398	3.91179e-06	0.0598856	APC	18011628	0	1		PR:PC_3 5:93313737-94878238	FALSE	FALSE
	FAM81B	153643	family with sequence similarity 81, member B	5	94727047	94786144	5q15	0.0150937	0.909664	1	APC	17257057	0	1		PR:PC_3 5:93313737-94878238	FALSE	FALSE
	COMMD10	51397	COMM domain containing 10	5	115420726	115628978	5q23.1	0.19966	0.12949	1	APC	3238790	0	1		OV:OVCAR_4 5:115530375-115603935	FALSE	FALSE
	LOC389332	389332	hypothetical LOC389332	5	135527155	135528851	5q31.1	0.22022	0.0966934	1	CTNNA1	2560255	1	1	OV:SK_OV_3 5:135493613-135735114	CO:SW_620 5:135371182-135542186	FALSE	FALSE
	TGFBI	7045	transforming growth factor, beta-induced, 68kDa	5	135364583	135399507	5q31.1	0.222496	0.0875103	1	CTNNA1	2689599	0	1		CO:SW_620 5:135371182-135542186	FALSE	FALSE
	PKD2L2	27039	polycystic kidney disease 2-like 2	5	137225124	137276156	5q31.2	0.195634	0.137561	1	CTNNA1	812950	0	1		OV:SK_OV_3 5:135741850-137719205	FALSE	FALSE
	KLHL3	26249	kelch-like 3 (Drosophila)	5	136953188	137071779	5q31.2	0.224518	0.0845959	1	CTNNA1	1017327	0	1		OV:SK_OV_3 5:135741850-137719205	FALSE	FALSE
	CTNNA1	1495	catenin (cadherin-associated protein), alpha 1, 102kDa	5	138089106	138270723	5q31.2	0.629524	7.12388e-08	0.00118249	CTNNA1	0	0	1		PR:PC_3 5:138157532-138312551	FALSE	FALSE
	CDC25C	995	cell division cycle 25 homolog C (S. pombe)	5	137620958	137667516	5q31.2	0.473153	0.000134615	1	CTNNA1	421590	0	1		OV:SK_OV_3 5:135741850-137719205	FALSE	FALSE
	BRD8	10902	bromodomain containing 8	5	137475458	137514358	5q31.2	0.502411	5.02e-05	0.711234	CTNNA1	574748	0	1		OV:SK_OV_3 5:135741850-137719205	FALSE	FALSE
	KDM3B	51780	lysine (K)-specific demethylase 3B	5	137688284	137772716	5q31.2	0.463985	0.000188466	1	CTNNA1	316390	0	1		OV:SK_OV_3 5:135741850-137719205	FALSE	FALSE
	SPINK5	11005	serine peptidase inhibitor, Kazal type 5	5	147443534	147516925	5q32	0.165339	0.210768	1	CTNNA1	9172811	0	1		RE:TK_10 5:146278838-148075488	FALSE	FALSE
	JAKMIP2	9832	janus kinase and microtubule interacting protein 2	5	146965003	147162411	5q32	-0.130102	0.321789	1	CTNNA1	8694280	0	1		RE:TK_10 5:146278838-148075488	FALSE	FALSE
	SPINK6	404203	serine peptidase inhibitor, Kazal type 6	5	147582356	147594700	5q32	0.112617	0.391608	1	CTNNA1	9311633	0	1		RE:TK_10 5:146278838-148075488	FALSE	FALSE
	GEMIN5	25929	gem (nuclear organelle) associated protein 5	5	154266975	154317776	5q33.2	0.459521	0.000221261	1	CTNNA1	15996252	0	1		RE:RXF_393 5:154167572-154340247	FALSE	FALSE
	DOCK2	1794	dedicator of cytokinesis 2	5	169064250	169510386	5q35.1	0.0197663	0.880841	1	NPM1	1304321	0	1		PR:PC_3 5:169338727-170581284	FALSE	FALSE
	FAM196B	100131897	family with sequence similarity 196, member B	5	169290718	169407744	5q35.1	0.160356	0.220982	1	NPM1	1406963	0	1		PR:PC_3 5:169338727-170581284	FALSE	FALSE
	RANBP17	64901	RAN binding protein 17	5	170288895	170727019	5q35.1	0.202618	0.120516	1	NPM1	87688	0	1		PR:PC_3 5:169338727-170581284	FALSE	FALSE
	CPLX2	10814	complexin 2	5	175223609	175311023	5q35.2	0.100623	0.444289	1	NPM1	4385721	0	1		PR:PC_3 5:173759187-175271868	FALSE	FALSE
	CCDC127	133957	coiled-coil domain containing 127	5	204874	218297	5p15.33	0.734458	2.41002e-11	4.32864e-07	MAST4	65673878	0	1		RE:RXF_393 5:188789-570728	FALSE	FALSE
	SDHA	6389	succinate dehydrogenase complex, subunit A, flavoprotein (Fp)	5	218355	256814	5p15.33	0.699471	7.13948e-10	1.25198e-05	MAST4	65635361	0	1		RE:RXF_393 5:188789-570728	FALSE	FALSE
	PLEKHG4B	153478	pleckstrin homology domain containing, family G (with RhoGef domain) member 4B	5	140372	190087	5p15.33	0.219196	0.0924338	1	MAST4	65702088	0	1		RE:RXF_393 5:188789-570728	FALSE	FALSE
	PDCD6	10016	programmed cell death 6	5	271735	315089	5p15.33	0.64956	1.96691e-08	0.00033282	MAST4	65577086	0	1		RE:RXF_393 5:188789-570728	FALSE	FALSE
	EXOC3	11336	exocyst complex component 3	5	443333	467409	5p15.33	0.760577	1.78595e-12	3.24596e-08	MAST4	65424766	0	1		RE:RXF_393 5:188789-570728	FALSE	FALSE
	C5orf55	116349	chromosome 5 open reading frame 55	5	441642	443258	5p15.33	0.365294	0.00410558	1	MAST4	65448917	0	1		RE:RXF_393 5:188789-570728	FALSE	FALSE
	CLPTM1L	81037	CLPTM1-like	5	1317999	1345002	5p15.33	0.744703	9.01495e-12	1.62774e-07	MAST4	64547173	0	1		RE:RXF_393 5:1323208-1527624	FALSE	FALSE
	CENPK	64105	centromere protein K	5	64813592	64858995	5q12.3	0.535262	1.25431e-05	0.185538	MAST4	1033180	0	1		PR:PC_3 5:64713749-66130058	FALSE	FALSE
	TRIM23	373	tripartite motif containing 23	5	64885506	64920187	5q12.3	0.353699	0.00556557	1	MAST4	971988	0	1		PR:PC_3 5:64713749-66130058	FALSE	FALSE
	NLN	57486	neurolysin (metallopeptidase M3 family)	5	65018022	65125111	5q12.3	0.510643	3.06541e-05	0.441266	MAST4	767064	0	1		PR:PC_3 5:64713749-66130058	FALSE	FALSE
	SREK1	140890	splicing regulatory glutamine/lysine-rich protein 1	5	65440045	65479444	5q12.3	0.647312	2.28325e-08	0.000385733	MAST4	412731	0	1		PR:PC_3 5:64713749-66130058	FALSE	FALSE
	GTF2H2C	728340	general transcription factor IIH, polypeptide 2C	5	68856050	68888729	5q13.2	0.400919	0.001501	1	PIK3R1	1258401	0	1		BR:BT_549 5:68802340-70800563	FALSE	FALSE
	ZNF366	167465	zinc finger protein 366	5	71739233	71803249	5q13.2	-0.0139714	0.916356	1	PIK3R1	4141584	0	1		OV:SK_OV_3 5:71679524-72176200	FALSE	FALSE
	TNPO1	3842	transportin 1	5	72112417	72210215	5q13.2	0.278235	0.0313528	1	PIK3R1	4514768	0	1		OV:SK_OV_3 5:71679524-72176200	FALSE	FALSE
	TTC37	9652	tetratricopeptide repeat domain 37	5	94799598	94890709	5q15	0.313028	0.0148818	1	APC	17152492	0	1		PR:PC_3 5:93313737-94878238	FALSE	FALSE
	SMAD5	4090	SMAD family member 5	5	135468535	135518422	5q31.1	0.493434	6.17676e-05	0.868514	CTNNA1	2570684	0	1		CO:SW_620 5:135371182-135542186	FALSE	FALSE
	HNRNPA0	10949	heterogeneous nuclear ribonucleoprotein A0	5	137087072	137090039	5q31.2	0.494143	6.00544e-05	0.845266	CTNNA1	999067	0	1		OV:SK_OV_3 5:135741850-137719205	FALSE	FALSE
	MYOT	9499	myotilin	5	137203544	137223540	5q31.2	0.0946471	0.471938	1	CTNNA1	865566	0	1		OV:SK_OV_3 5:135741850-137719205	FALSE	FALSE
	NPY6R	4888	neuropeptide Y receptor Y6 (pseudogene)	5	137136881	137146439	5q31.2	0.0320376	0.808002	1	CTNNA1	942667	0	1		OV:SK_OV_3 5:135741850-137719205	FALSE	FALSE
	WNT8A	7478	wingless-type MMTV integration site family, member 8A	5	137419773	137427199	5q31.2	0.295431	0.0231071	1	CTNNA1	661907	0	1		OV:SK_OV_3 5:135741850-137719205	FALSE	FALSE
	NME5	8382	non-metastatic cells 5, protein expressed in (nucleoside-diphosphate kinase)	5	137450860	137475132	5q31.2	0.0693285	0.601839	1	CTNNA1	613974	0	1		OV:SK_OV_3 5:135741850-137719205	FALSE	FALSE
	KIF20A	10112	kinesin family member 20A	5	137514416	137523404	5q31.2	0.519682	2.08928e-05	0.304388	CTNNA1	565702	0	1		OV:SK_OV_3 5:135741850-137719205	FALSE	FALSE
	GFRA3	2676	GDNF family receptor alpha 3	5	137588068	137610253	5q31.2	-0.0508872	0.699401	1	CTNNA1	478853	0	1		OV:SK_OV_3 5:135741850-137719205	FALSE	FALSE
	CDC23	8697	cell division cycle 23 homolog (S. cerevisiae)	5	137523336	137549032	5q31.2	0.611848	2.05957e-07	0.00335978	CTNNA1	540074	0	1		OV:SK_OV_3 5:135741850-137719205	FALSE	FALSE
	FAM53C	51307	family with sequence similarity 53, member C	5	137673223	137685418	5q31.2	0.57053	1.94335e-06	0.0302347	CTNNA1	403688	0	1		OV:SK_OV_3 5:135741850-137719205	FALSE	FALSE
	LRRTM2	26045	leucine rich repeat transmembrane neuronal 2	5	138205078	138211057	5q31.2	0.127854	0.330295	1	CTNNA1	59666	0	1		PR:PC_3 5:138157532-138312551	FALSE	FALSE
	SCGB3A2	117156	secretoglobin, family 3A, member 2	5	147258273	147261756	5q32	-0.0368593	0.781659	1	CTNNA1	8987550	0	1		RE:TK_10 5:146278838-148075488	FALSE	FALSE
	C5orf46	389336	chromosome 5 open reading frame 46	5	147272270	147286101	5q32	0.0777276	0.554987	1	CTNNA1	9001547	0	1		RE:TK_10 5:146278838-148075488	FALSE	FALSE
	SPINK1	6690	serine peptidase inhibitor, Kazal type 1	5	147204142	147211260	5q32	-0.170662	0.192328	1	CTNNA1	8933419	0	1		RE:TK_10 5:146278838-148075488	FALSE	FALSE
	SPINK13	153218	serine peptidase inhibitor, Kazal type 13 (putative)	5	147648422	147665773	5q32	0.299595	0.0200434	1	CTNNA1	9377699	0	1		RE:TK_10 5:146278838-148075488	FALSE	FALSE
	FBXO38	81545	F-box protein 38	5	147763497	147822399	5q32	0.405935	0.00142329	1	CTNNA1	9492774	0	1		RE:TK_10 5:146278838-148075488	FALSE	FALSE
	CNOT8	9337	CCR4-NOT transcription complex, subunit 8	5	154238197	154256352	5q33.2	0.571893	1.81338e-06	0.0282524	CTNNA1	15967474	0	1		RE:RXF_393 5:154167572-154340247	FALSE	FALSE
	MRPL22	29093	mitochondrial ribosomal protein L22	5	154320632	154348971	5q33.2	0.47196	0.000140719	1	CTNNA1	16049909	0	1		RE:RXF_393 5:154167572-154340247	FALSE	FALSE
	FOXI1	2299	forkhead box I1	5	169532916	169536729	5q35.1	0.102193	0.437177	1	NPM1	1277978	0	1		PR:PC_3 5:169338727-170581284	FALSE	FALSE
	LCP2	3937	lymphocyte cytosolic protein 2 (SH2 domain containing leukocyte protein of 76kDa)	5	169675087	169724822	5q35.1	-0.0677816	0.606845	1	NPM1	1089885	0	1		PR:PC_3 5:169338727-170581284	FALSE	FALSE
	C5orf58	133874	chromosome 5 open reading frame 58	5	169659949	169673235	5q35.1	0.2322	0.0742188	1	NPM1	1141472	0	1		PR:PC_3 5:169338727-170581284	FALSE	FALSE
	KCNMB1	3779	potassium large conductance calcium-activated channel, subfamily M, beta member 1	5	169805164	169816681	5q35.1	0.154217	0.24353	1	NPM1	998026	0	1		PR:PC_3 5:169338727-170581284	FALSE	FALSE
	LOC257358	257358	hypothetical LOC257358	5	169758434	169762104	5q35.1	-0.0659168	0.619878	1	NPM1	1052603	0	1		PR:PC_3 5:169338727-170581284	FALSE	FALSE
	GABRP	2568	gamma-aminobutyric acid (GABA) A receptor, pi	5	170210722	170241050	5q35.1	0.132043	0.314561	1	NPM1	573657	0	1		PR:PC_3 5:169338727-170581284	FALSE	FALSE
	MSX2	4488	msh homeobox 2	5	174151574	174157902	5q35.2	0.0857692	0.514664	1	NPM1	3313686	0	1		PR:PC_3 5:173759187-175271868	FALSE	FALSE
	SFXN1	94081	sideroflexin 1	5	174905513	174955621	5q35.2	0.292921	0.023129	1	NPM1	4067625	0	1		PR:PC_3 5:173759187-175271868	FALSE	FALSE
	DRD1	1812	dopamine receptor D1	5	174867674	174871163	5q35.2	0.125915	0.33774	1	NPM1	4029786	0	1		PR:PC_3 5:173759187-175271868	FALSE	FALSE
	NRAS	4893	neuroblastoma RAS viral (v-ras) oncogene homolog	1	115247084	115259515	1p13.2	0.794564	3.51966e-14	6.45611e-10	CD58	1797640	1	0	BR:MCF7 1:114337019-115357708		FALSE	FALSE
	PGM3	5238	phosphoglucomutase 3	6	83874592	83903655	6q14.1:6q14.2	0.524548	1.69193e-05	0.248071	TTK	3122348	0	1		LE:RPMI_8226 6:83899442-84046737	FALSE	FALSE
	LYRM4	57128	LYR motif containing 4	6	5108652	5261172	6p25.1	0.706599	2.82092e-10	4.984e-06	E2F3	15140964	0	1		ME:LOXIMVI 6:5181650-5494099	FALSE	FALSE
	LOC285768	285768	hypothetical LOC285768	6	961240	1101567	6p25.3	0.099093	0.455243	1	E2F3	19300569	0	1		LC:EKVX 6:780703-1885520	FALSE	FALSE
	DNAH8	1769	dynein, axonemal, heavy chain 8	6	38683116	38998574	6p21.2	0.340253	0.00836935	1	E2F3	18189171	0	1		BR:MDA_MB_231 6:38466642-39703373	FALSE	FALSE
	RRP36	88745	ribosomal RNA processing 36 homolog (S. cerevisiae)	6	42989384	42997337	6p21.1	0.694812	7.34537e-10	1.28779e-05	E2F3	22495439	1	1	BR:MDA_MB_231 6:39745390-43216372	LC:NCI_H522 6:40006812-44575692	FALSE	FALSE
	DST	667	dystonin	6	56322784	56819426	6p12.1	0.252886	0.0512407	1	TTK	23894895	0	1		LC:NCI_H522 6:55926912-57328607	FALSE	FALSE
	CD109	135228	CD109 molecule	6	74405507	74538041	6q13	0.155547	0.235323	1	TTK	6176280	1	1	LC:HOP_62 6:70584770-74942334	OV:SK_OV_3 6:72594699-75029039	FALSE	FALSE
	KCNQ5	56479	potassium voltage-gated channel, KQT-like subfamily, member 5	6	73331570	73908573	6q13	0.552993	4.60803e-06	0.0702678	TTK	6805748	1	1	LC:HOP_62 6:70584770-74942334	OV:SK_OV_3 6:72594699-75029039	FALSE	FALSE
	ARHGAP18	93663	Rho GTPase activating protein 18	6	129898239	130031370	6q22.33	0.203833	0.11826	1	TNFAIP3	8156954	0	1		LC:HOP_92 6:129003474-132326265	FALSE	FALSE
	SAMD5	389432	sterile alpha motif domain containing 5	6	147829827	147891157	6q24.3	0.0681059	0.605121	1	TNFAIP3	9625376	0	1		OV:IGROV1 6:147861514-147908198	FALSE	FALSE
	FARS2	10667	phenylalanyl-tRNA synthetase 2, mitochondrial	6	5261583	5771816	6p25.1	0.646872	2.35045e-08	0.000396921	E2F3	14630320	0	1		ME:LOXIMVI 6:5181650-5494099	FALSE	FALSE
	ATXN1	6310	ataxin 1	6	16299342	16761721	6p22.3	0.108292	0.410163	1	E2F3	3640415	0	1		LC:NCI_H522 6:16515338-16569141	FALSE	FALSE
	BTN2A1	11120	butyrophilin, subfamily 2, member A1	6	26458152	26476849	6p22.2	0.655171	1.34833e-08	0.000229432	E2F3	5964207	0	1		LC:NCI_H522 6:25933299-27873427	FALSE	FALSE
	BTBD9	114781	BTB (POZ) domain containing 9	6	38136226	38607924	6p21.2	0.727307	4.6632e-11	8.34899e-07	E2F3	17642281	0	1		BR:MDA_MB_231 6:38466642-39703373	FALSE	FALSE
	GLO1	2739	glyoxalase I	6	38643701	38670952	6p21.2	0.73928	1.52583e-11	2.74681e-07	E2F3	18149756	0	1		BR:MDA_MB_231 6:38466642-39703373	FALSE	FALSE
	KIF6	221458	kinesin family member 6	6	39302875	39693181	6p21.2	0.0415879	0.754476	1	E2F3	18808930	0	1		BR:MDA_MB_231 6:38466642-39703373	FALSE	FALSE
	KCNK5	8645	potassium channel, subfamily K, member 5	6	39156746	39197251	6p21.2	0.416934	0.000919963	1	E2F3	18662801	0	1		BR:MDA_MB_231 6:38466642-39703373	FALSE	FALSE
	LRFN2	57497	leucine rich repeat and fibronectin type III domain containing 2	6	40359372	40555126	6p21.2:6p21.1	0.00144708	0.991321	1	E2F3	19865427	1	1	BR:MDA_MB_231 6:39745390-43216372	LC:NCI_H522 6:40006812-44575692	FALSE	FALSE
	APOBEC2	10930	apolipoprotein B mRNA editing enzyme, catalytic polypeptide-like 2	6	41020939	41032630	6p21.1	0.0338753	0.79895	1	E2F3	20526994	1	1	BR:MDA_MB_231 6:39745390-43216372	LC:NCI_H522 6:40006812-44575692	FALSE	FALSE
	TFEB	7942	transcription factor EB	6	41651715	41703997	6p21.1	0.537768	9.3805e-06	0.140004	E2F3	21157770	1	1	BR:MDA_MB_231 6:39745390-43216372	LC:NCI_H522 6:40006812-44575692	FALSE	FALSE
	FOXP4	116113	forkhead box P4	6	41514163	41570122	6p21.1	0.767922	8.08994e-13	1.47342e-08	E2F3	21020218	1	1	BR:MDA_MB_231 6:39745390-43216372	LC:NCI_H522 6:40006812-44575692	FALSE	FALSE
	USP49	25862	ubiquitin specific peptidase 49	6	41765382	41863099	6p21.1	0.60469	3.10873e-07	0.00502744	E2F3	21271437	1	1	BR:MDA_MB_231 6:39745390-43216372	LC:NCI_H522 6:40006812-44575692	FALSE	FALSE
	TRERF1	55809	transcriptional regulating factor 1	6	42192668	42419783	6p21.1	0.353407	0.00560756	1	E2F3	21698723	1	1	BR:MDA_MB_231 6:39745390-43216372	LC:NCI_H522 6:40006812-44575692	FALSE	FALSE
	C6orf132	647024	chromosome 6 open reading frame 132	6	42068856	42110715	6p21.1	0.336712	0.00852369	1	E2F3	21574911	1	1	BR:MDA_MB_231 6:39745390-43216372	LC:NCI_H522 6:40006812-44575692	FALSE	FALSE
	UBR2	23304	ubiquitin protein ligase E3 component n-recognin 2	6	42531759	42661243	6p21.1	0.744416	9.27336e-12	1.67412e-07	E2F3	22037814	1	1	BR:MDA_MB_231 6:39745390-43216372	LC:NCI_H522 6:40006812-44575692	FALSE	FALSE
	PTK7	5754	PTK7 protein tyrosine kinase 7	6	43044005	43129458	6p21.1	0.114137	0.385204	1	E2F3	22550060	1	1	BR:MDA_MB_231 6:39745390-43216372	LC:NCI_H522 6:40006812-44575692	FALSE	FALSE
	TTBK1	84630	tau tubulin kinase 1	6	43211221	43255997	6p21.1	-0.0594874	0.654477	1	E2F3	22717276	0	1		LC:NCI_H522 6:40006812-44575692	FALSE	FALSE
	XPO5	57510	exportin 5	6	43490067	43543812	6p21.1	0.655957	1.27805e-08	0.000217678	E2F3	22996122	0	1		LC:NCI_H522 6:40006812-44575692	FALSE	FALSE
	MRPS18A	55168	mitochondrial ribosomal protein S18A	6	43638933	43655549	6p21.1	0.331439	0.0096849	1	E2F3	23144988	0	1		LC:NCI_H522 6:40006812-44575692	FALSE	FALSE
	COL21A1	81578	collagen, type XXI, alpha 1	6	55921387	56112378	6p12.1	0.0543897	0.679794	1	TTK	24601943	0	1		LC:NCI_H522 6:55926912-57328607	FALSE	FALSE
	BEND6	221336	BEN domain containing 6	6	56819772	56892142	6p12.1	-0.00998466	0.939645	1	TTK	23822179	0	1		LC:NCI_H522 6:55926912-57328607	FALSE	FALSE
	ZNF451	26036	zinc finger protein 451	6	56954807	57035098	6p12.1:6p11.2	0.470565	0.000148173	1	TTK	23679223	0	1		LC:NCI_H522 6:55926912-57328607	FALSE	FALSE
	PRIM2	5558	primase, DNA, polypeptide 2 (58kDa)	6	57182421	57513376	6p11.2	0.658681	1.06037e-08	0.000181101	TTK	23200945	0	1		LC:NCI_H522 6:55926912-57328607	FALSE	FALSE
	COL19A1	1310	collagen, type XIX, alpha 1	6	70576447	70922157	6q13	0.084834	0.519276	1	TTK	9792164	0	1		LC:HOP_62 6:67025864-70580860	FALSE	FALSE
	LMBRD1	55788	LMBR1 domain containing 1	6	70385640	70507049	6q13	0.376284	0.00304554	1	TTK	10207272	0	1		LC:HOP_62 6:67025864-70580860	FALSE	FALSE
	RIMS1	22999	regulating synaptic membrane exocytosis 1	6	72596405	73112845	6q13	0.101028	0.442449	1	TTK	7601476	1	1	LC:HOP_62 6:70584770-74942334	OV:SK_OV_3 6:72594699-75029039	FALSE	FALSE
	MTO1	25821	mitochondrial translation optimization 1 homolog (S. cerevisiae)	6	74171453	74211179	6q13	0.705643	3.05384e-10	5.39307e-06	TTK	6503142	1	1	LC:HOP_62 6:70584770-74942334	OV:SK_OV_3 6:72594699-75029039	FALSE	FALSE
	SLC17A5	26503	solute carrier family 17 (anion/sugar transporter), member 5	6	74303101	74363737	6q13	0.487576	7.77456e-05	1	TTK	6350584	1	1	LC:HOP_62 6:70584770-74942334	OV:SK_OV_3 6:72594699-75029039	FALSE	FALSE
	ME1	4199	malic enzyme 1, NADP(+)-dependent, cytosolic	6	83920109	84140938	6q14.2	-0.0580286	0.659645	1	TTK	3167865	0	1		LE:RPMI_8226 6:83899442-84046737	FALSE	FALSE
	LAMA2	3908	laminin, alpha 2	6	129204285	129837710	6q22.33	-0.0682976	0.604103	1	TNFAIP3	8350614	0	1		LC:HOP_92 6:129003474-132326265	FALSE	FALSE
	L3MBTL3	84456	l(3)mbt-like 3 (Drosophila)	6	130339727	130462594	6q23.1	0.299931	0.019898	1	TNFAIP3	7725730	0	1		LC:HOP_92 6:129003474-132326265	FALSE	FALSE
	SAMD3	154075	sterile alpha motif domain containing 3	6	130465446	130686570	6q23.1	0.198786	0.127849	1	TNFAIP3	7501754	0	1		LC:HOP_92 6:129003474-132326265	FALSE	FALSE
	EPB41L2	2037	erythrocyte membrane protein band 4.1-like 2	6	131160487	131384462	6q23.1:6q23.2	0.388487	0.00215954	1	TNFAIP3	6803862	0	1		LC:HOP_92 6:129003474-132326265	FALSE	FALSE
	AKAP7	9465	A kinase (PRKA) anchor protein 7	6	131456825	131604675	6q23.2	0.284318	0.0276902	1	TNFAIP3	6583649	0	1		LC:HOP_92 6:129003474-132326265	FALSE	FALSE
	ENPP3	5169	ectonucleotide pyrophosphatase/phosphodiesterase 3	6	131958441	132068550	6q23.2	0.0862479	0.512312	1	TNFAIP3	6119774	0	1		LC:HOP_92 6:129003474-132326265	FALSE	FALSE
	VTA1	51534	Vps20-associated 1 homolog (S. cerevisiae)	6	142468409	142542085	6q24.1	0.551927	4.84879e-06	0.0738034	TNFAIP3	4263958	0	1		CNS:SF_268 6:142380247-142665224	FALSE	FALSE
	GPR126	57211	G protein-coupled receptor 126	6	142623055	142767403	6q24.1	-0.259159	0.0455528	1	TNFAIP3	4418604	0	1		CNS:SF_268 6:142380247-142665224	FALSE	FALSE
	FOXF2	2295	forkhead box F2	6	1390068	1395832	6p25.3	0.183696	0.160033	1	E2F3	19006304	0	1		LC:EKVX 6:780703-1885520	FALSE	FALSE
	FOXQ1	94234	forkhead box Q1	6	1312674	1314993	6p25.3	-0.0789195	0.548916	1	E2F3	19087143	0	1		LC:EKVX 6:780703-1885520	FALSE	FALSE
	FOXC1	2296	forkhead box C1	6	1610680	1614129	6p25.3	0.308314	0.0165456	1	E2F3	18788007	0	1		LC:EKVX 6:780703-1885520	FALSE	FALSE
	MYLIP	29116	myosin regulatory light chain interacting protein	6	16129316	16148478	6p22.3	0.402993	0.00141068	1	E2F3	4253658	0	1		LC:NCI_H522 6:15938334-16234241	FALSE	FALSE
	HIST1H2AB	8335	histone cluster 1, H2ab	6	26033319	26033796	6p22.2	0.00861106	0.94839	1	E2F3	5539374	0	1		LC:NCI_H522 6:25933299-27873427	FALSE	FALSE
	HIST1H4A	8359	histone cluster 1, H4a	6	26021906	26022278	6p22.2	-0.0600656	0.648469	1	E2F3	5527961	0	1		LC:NCI_H522 6:25933299-27873427	FALSE	FALSE
	HIST1H3B	8358	histone cluster 1, H3b	6	26031816	26032288	6p22.2	0.218942	0.0928213	1	E2F3	5537871	0	1		LC:NCI_H522 6:25933299-27873427	FALSE	FALSE
	HIST1H1C	3006	histone cluster 1, H1c	6	26055967	26056699	6p22.2	0.217699	0.0976546	1	E2F3	5562022	0	1		LC:NCI_H522 6:25933299-27873427	FALSE	FALSE
	HIST1H2BB	3018	histone cluster 1, H2bb	6	26043454	26043885	6p22.2	0.183807	0.163455	1	E2F3	5549509	0	1		LC:NCI_H522 6:25933299-27873427	FALSE	FALSE
	HIST1H1A	3024	histone cluster 1, H1a	6	26017259	26018040	6p22.2	0.0348243	0.791662	1	E2F3	5523314	0	1		LC:NCI_H522 6:25933299-27873427	FALSE	FALSE
	TRIM38	10475	tripartite motif containing 38	6	25962916	25987557	6p22.2	0.273376	0.0345613	1	E2F3	5468971	0	1		LC:NCI_H522 6:25933299-27873427	FALSE	FALSE
	HIST1H3C	8352	histone cluster 1, H3c	6	26045638	26046097	6p22.2	-0.00905491	0.945734	1	E2F3	5551693	0	1		LC:NCI_H522 6:25933299-27873427	FALSE	FALSE
	HIST1H3A	8350	histone cluster 1, H3a	6	26020717	26021186	6p22.2	-0.161989	0.220292	1	E2F3	5526772	0	1		LC:NCI_H522 6:25933299-27873427	FALSE	FALSE
	HIST1H4B	8366	histone cluster 1, H4b	6	26027123	26027480	6p22.2	0.199364	0.126722	1	E2F3	5533178	0	1		LC:NCI_H522 6:25933299-27873427	FALSE	FALSE
	HIST1H1T	3010	histone cluster 1, H1t	6	26107639	26108364	6p22.2	-0.0700055	0.601544	1	E2F3	5613694	0	1		LC:NCI_H522 6:25933299-27873427	FALSE	FALSE
	HIST1H2AD	3013	histone cluster 1, H2ad	6	26199011	26199521	6p22.2	0.156569	0.232224	1	E2F3	5705066	0	1		LC:NCI_H522 6:25933299-27873427	FALSE	FALSE
	HIST1H2BD	3017	histone cluster 1, H2bd	6	26158348	26171576	6p22.2	0.219391	0.0921363	1	E2F3	5664403	0	1		LC:NCI_H522 6:25933299-27873427	FALSE	FALSE
	HIST1H4C	8364	histone cluster 1, H4c	6	26104175	26104565	6p22.2	0.133679	0.308551	1	E2F3	5610230	0	1		LC:NCI_H522 6:25933299-27873427	FALSE	FALSE
	HIST1H2BF	8343	histone cluster 1, H2bf	6	26199786	26200216	6p22.2	0.247177	0.0569088	1	E2F3	5705841	0	1		LC:NCI_H522 6:25933299-27873427	FALSE	FALSE
	HIST1H2BE	8344	histone cluster 1, H2be	6	26184023	26184458	6p22.2	0.0773177	0.557082	1	E2F3	5690078	0	1		LC:NCI_H522 6:25933299-27873427	FALSE	FALSE
	HFE	3077	hemochromatosis	6	26087508	26095469	6p22.2	-0.171072	0.191246	1	E2F3	5593563	0	1		LC:NCI_H522 6:25933299-27873427	FALSE	FALSE
	HIST1H2AC	8334	histone cluster 1, H2ac	6	26124372	26124918	6p22.2	0.196924	0.131532	1	E2F3	5630427	0	1		LC:NCI_H522 6:25933299-27873427	FALSE	FALSE
	HIST1H3D	8351	histone cluster 1, H3d	6	26197011	26199521	6p22.2	0.0629901	0.632557	1	E2F3	5703066	0	1		LC:NCI_H522 6:25933299-27873427	FALSE	FALSE
	HIST1H4D	8360	histone cluster 1, H4d	6	26188937	26189304	6p22.2	-0.184337	0.162223	1	E2F3	5694992	0	1		LC:NCI_H522 6:25933299-27873427	FALSE	FALSE
	HIST1H2BC	8347	histone cluster 1, H2bc	6	26123694	26124132	6p22.2	0.0929267	0.480066	1	E2F3	5629749	0	1		LC:NCI_H522 6:25933299-27873427	FALSE	FALSE
	HIST1H4E	8367	histone cluster 1, H4e	6	26204872	26205249	6p22.2	-0.00118656	0.992821	1	E2F3	5710927	0	1		LC:NCI_H522 6:25933299-27873427	FALSE	FALSE
	HIST1H1E	3008	histone cluster 1, H1e	6	26156558	26157343	6p22.2	0.19896	0.130867	1	E2F3	5662613	0	1		LC:NCI_H522 6:25933299-27873427	FALSE	FALSE
	HIST1H4G	8369	histone cluster 1, H4g	6	26246838	26247205	6p22.2	0.364074	0.00424134	1	E2F3	5752893	0	1		LC:NCI_H522 6:25933299-27873427	FALSE	FALSE
	HIST1H1D	3007	histone cluster 1, H1d	6	26234439	26235216	6p22.2	-0.177959	0.181389	1	E2F3	5740494	0	1		LC:NCI_H522 6:25933299-27873427	FALSE	FALSE
	HIST1H2AE	3012	histone cluster 1, H2ae	6	26217147	26217711	6p22.2	-0.00761736	0.954339	1	E2F3	5723202	0	1		LC:NCI_H522 6:25933299-27873427	FALSE	FALSE
	HIST1H4H	8365	histone cluster 1, H4h	6	26285353	26285727	6p22.2	0.161896	0.21652	1	E2F3	5791408	0	1		LC:NCI_H522 6:25933299-27873427	FALSE	FALSE
	HIST1H2BG	8339	histone cluster 1, H2bg	6	26216427	26216872	6p22.2	0.154345	0.239005	1	E2F3	5722482	0	1		LC:NCI_H522 6:25933299-27873427	FALSE	FALSE
	HIST1H3E	8353	histone cluster 1, H3e	6	26225382	26225844	6p22.2	0.224528	0.0873326	1	E2F3	5731437	0	1		LC:NCI_H522 6:25933299-27873427	FALSE	FALSE
	HIST1H4F	8361	histone cluster 1, H4f	6	26240653	26241021	6p22.2	0.123944	0.353945	1	E2F3	5746708	0	1		LC:NCI_H522 6:25933299-27873427	FALSE	FALSE
	HIST1H3F	8968	histone cluster 1, H3f	6	26250369	26250835	6p22.2	0.154659	0.242164	1	E2F3	5756424	0	1		LC:NCI_H522 6:25933299-27873427	FALSE	FALSE
	HIST1H2BI	8346	histone cluster 1, H2bi	6	26273203	26273640	6p22.2	-0.0842707	0.522064	1	E2F3	5779258	0	1		LC:NCI_H522 6:25933299-27873427	FALSE	FALSE
	HIST1H2BH	8345	histone cluster 1, H2bh	6	26251878	26252303	6p22.2	0.140916	0.287075	1	E2F3	5757933	0	1		LC:NCI_H522 6:25933299-27873427	FALSE	FALSE
	BTN3A1	11119	butyrophilin, subfamily 3, member A1	6	26402464	26415444	6p22.2	0.183788	0.159821	1	E2F3	5908519	0	1		LC:NCI_H522 6:25933299-27873427	FALSE	FALSE
	BTN2A2	10385	butyrophilin, subfamily 2, member A2	6	26383323	26395100	6p22.2	0.486857	7.995e-05	1	E2F3	5889378	0	1		LC:NCI_H522 6:25933299-27873427	FALSE	FALSE
	BTN3A3	10384	butyrophilin, subfamily 3, member A3	6	26440699	26453643	6p22.2	0.219483	0.0919969	1	E2F3	5946754	0	1		LC:NCI_H522 6:25933299-27873427	FALSE	FALSE
	BTN3A2	11118	butyrophilin, subfamily 3, member A2	6	26365397	26378548	6p22.2	0.173728	0.184342	1	E2F3	5871452	0	1		LC:NCI_H522 6:25933299-27873427	FALSE	FALSE
	ABT1	29777	activator of basal transcription 1	6	26597170	26600277	6p22.2	0.616225	1.59314e-07	0.00260876	E2F3	6103225	0	1		LC:NCI_H522 6:25933299-27873427	FALSE	FALSE
	HMGN4	10473	high mobility group nucleosomal binding domain 4	6	26538571	26547164	6p22.2	0.614037	1.81231e-07	0.00296167	E2F3	6044626	0	1		LC:NCI_H522 6:25933299-27873427	FALSE	FALSE
	BTN1A1	696	butyrophilin, subfamily 1, member A1	6	26501494	26510652	6p22.2	0.184775	0.16121	1	E2F3	6007549	0	1		LC:NCI_H522 6:25933299-27873427	FALSE	FALSE
	HCG11	493812	HLA complex group 11	6	26521933	26527612	6p22.2	0.274445	0.0354202	1	E2F3	6027988	0	1		LC:NCI_H522 6:25933299-27873427	FALSE	FALSE
	LOC100270746	100270746	hypothetical LOC100270746	6	26987144	26988085	6p22.2	0.113192	0.393331	1	E2F3	6493199	0	1		LC:NCI_H522 6:25933299-27873427	FALSE	FALSE
	HIST1H2AG	8969	histone cluster 1, H2ag	6	27100816	27101314	6p22.1	0.228673	0.0814998	1	E2F3	6606871	0	1		LC:NCI_H522 6:25933299-27873427	FALSE	FALSE
	HIST1H2BK	85236	histone cluster 1, H2bk	6	27106071	27114637	6p22.1	0.249928	0.054117	1	E2F3	6612126	0	1		LC:NCI_H522 6:25933299-27873427	FALSE	FALSE
	HIST1H2BJ	8970	histone cluster 1, H2bj	6	27100094	27100575	6p22.1	0.244842	0.061625	1	E2F3	6606149	0	1		LC:NCI_H522 6:25933299-27873427	FALSE	FALSE
	HIST1H2AH	85235	histone cluster 1, H2ah	6	27114860	27115341	6p22.1	0.190808	0.147728	1	E2F3	6620915	0	1		LC:NCI_H522 6:25933299-27873427	FALSE	FALSE
	PRSS16	10279	protease, serine, 16 (thymus)	6	27215501	27224399	6p22.1	-0.0232755	0.859884	1	E2F3	6721556	0	1		LC:NCI_H522 6:25933299-27873427	FALSE	FALSE
	ZNF204P	7754	zinc finger protein 204, pseudogene	6	27325601	27343153	6p22.1	0.155447	0.23563	1	E2F3	6831656	0	1		LC:NCI_H522 6:25933299-27873427	FALSE	FALSE
	POM121L2	94026	POM121 membrane glycoprotein-like 2	6	27276841	27280011	6p22.1	0.0101056	0.939448	1	E2F3	6782896	0	1		LC:NCI_H522 6:25933299-27873427	FALSE	FALSE
	ZNF391	346157	zinc finger protein 391	6	27356523	27369227	6p22.1	0.196428	0.13594	1	E2F3	6862578	0	1		LC:NCI_H522 6:25933299-27873427	FALSE	FALSE
	ZNF184	7738	zinc finger protein 184	6	27418520	27440897	6p22.1	0.440489	0.000428023	1	E2F3	6924575	0	1		LC:NCI_H522 6:25933299-27873427	FALSE	FALSE
	HIST1H2BM	8342	histone cluster 1, H2bm	6	27782821	27783267	6p22.1	-0.274319	0.0355079	1	E2F3	7288876	0	1		LC:NCI_H522 6:25933299-27873427	FALSE	FALSE
	HIST1H2BL	8340	histone cluster 1, H2bl	6	27775256	27775709	6p22.1	0.156048	0.23791	1	E2F3	7281311	0	1		LC:NCI_H522 6:25933299-27873427	FALSE	FALSE
	HIST1H3H	8357	histone cluster 1, H3h	6	27777841	27778314	6p22.1	0.0819846	0.537036	1	E2F3	7283896	0	1		LC:NCI_H522 6:25933299-27873427	FALSE	FALSE
	HIST1H2AJ	8331	histone cluster 1, H2aj	6	27782079	27782518	6p22.1	-0.0593342	0.65531	1	E2F3	7288134	0	1		LC:NCI_H522 6:25933299-27873427	FALSE	FALSE
	LOC100131289	100131289	similar to hCG1820927	6	27729522	27730966	6p22.1	-0.00931633	0.943678	1	E2F3	7235577	0	1		LC:NCI_H522 6:25933299-27873427	FALSE	FALSE
	HIST1H2AI	8329	histone cluster 1, H2ai	6	27775976	27776445	6p22.1	-0.0520741	0.695282	1	E2F3	7282031	0	1		LC:NCI_H522 6:25933299-27873427	FALSE	FALSE
	HIST1H2AM	8336	histone cluster 1, H2am	6	27860476	27860963	6p22.1	0.105971	0.424397	1	E2F3	7366531	0	1		LC:NCI_H522 6:25933299-27873427	FALSE	FALSE
	HIST1H4L	8368	histone cluster 1, H4l	6	27840925	27841289	6p22.1	-0.0698418	0.599146	1	E2F3	7346980	0	1		LC:NCI_H522 6:25933299-27873427	FALSE	FALSE
	HIST1H1B	3009	histone cluster 1, H1b	6	27834569	27835359	6p22.1	-0.0702021	0.594032	1	E2F3	7340624	0	1		LC:NCI_H522 6:25933299-27873427	FALSE	FALSE
	HIST1H2BN	8341	histone cluster 1, H2bn	6	27806439	27806888	6p22.1	0.0930056	0.483537	1	E2F3	7312494	0	1		LC:NCI_H522 6:25933299-27873427	FALSE	FALSE
	HIST1H3J	8356	histone cluster 1, H3j	6	27858092	27858570	6p22.1	-0.107238	0.418849	1	E2F3	7364147	0	1		LC:NCI_H522 6:25933299-27873427	FALSE	FALSE
	HIST1H3I	8354	histone cluster 1, H3i	6	27839622	27840099	6p22.1	-0.134573	0.309539	1	E2F3	7345677	0	1		LC:NCI_H522 6:25933299-27873427	FALSE	FALSE
	HIST1H4K	8362	histone cluster 1, H4k	6	27798951	27799305	6p22.1	-0.0977785	0.457336	1	E2F3	7305006	0	1		LC:NCI_H522 6:25933299-27873427	FALSE	FALSE
	HIST1H2AL	8332	histone cluster 1, H2al	6	27833106	27833576	6p22.1	0.149572	0.25819	1	E2F3	7339161	0	1		LC:NCI_H522 6:25933299-27873427	FALSE	FALSE
	HIST1H2AK	8330	histone cluster 1, H2ak	6	27805657	27806117	6p22.1	0.290849	0.0241652	1	E2F3	7311712	0	1		LC:NCI_H522 6:25933299-27873427	FALSE	FALSE
	HIST1H2BO	8348	histone cluster 1, H2bo	6	27861202	27861669	6p22.1	0.308559	0.0164553	1	E2F3	7367257	0	1		LC:NCI_H522 6:25933299-27873427	FALSE	FALSE
	HIST1H4J	8363	histone cluster 1, H4j	6	27791902	27792258	6p22.1	0.235254	0.0703855	1	E2F3	7297957	0	1		LC:NCI_H522 6:25933299-27873427	FALSE	FALSE
	HLA-DRB5	3127	major histocompatibility complex, class II, DR beta 5	6	32485153	32498006	6p21.32	0.0968141	0.461807	1	E2F3	11991208	0	1		OV:OVCAR_3 6:32495560-32592198	FALSE	FALSE
	GLP1R	2740	glucagon-like peptide 1 receptor	6	39016556	39055520	6p21.2	-0.0472859	0.722112	1	E2F3	18522611	0	1		BR:MDA_MB_231 6:38466642-39703373	FALSE	FALSE
	KCNK16	83795	potassium channel, subfamily K, member 16	6	39282473	39290330	6p21.2	-0.103668	0.434592	1	E2F3	18788528	0	1		BR:MDA_MB_231 6:38466642-39703373	FALSE	FALSE
	KCNK17	89822	potassium channel, subfamily K, member 17	6	39266776	39282237	6p21.2	0.0246373	0.851776	1	E2F3	18772831	0	1		BR:MDA_MB_231 6:38466642-39703373	FALSE	FALSE
	TDRG1	732253	testis development related protein 1	6	40346162	40347631	6p21.2	-0.0308812	0.814807	1	E2F3	19852217	1	1	BR:MDA_MB_231 6:39745390-43216372	LC:NCI_H522 6:40006812-44575692	FALSE	FALSE
	TSPO2	222642	translocator protein 2	6	41010236	41012076	6p21.1	0.580338	1.45194e-06	0.0227243	E2F3	20516291	1	1	BR:MDA_MB_231 6:39745390-43216372	LC:NCI_H522 6:40006812-44575692	FALSE	FALSE
	UNC5CL	222643	unc-5 homolog C (C. elegans)-like	6	40994639	41006938	6p21.1	0.612682	1.96187e-07	0.00320237	E2F3	20500694	1	1	BR:MDA_MB_231 6:39745390-43216372	LC:NCI_H522 6:40006812-44575692	FALSE	FALSE
	TREM2	54209	triggering receptor expressed on myeloid cells 2	6	41126243	41130924	6p21.1	0.182779	0.162167	1	E2F3	20632298	1	1	BR:MDA_MB_231 6:39745390-43216372	LC:NCI_H522 6:40006812-44575692	FALSE	FALSE
	NFYA	4800	nuclear transcription factor Y, alpha	6	41040706	41070146	6p21.1	0.667718	5.62908e-09	9.6854e-05	E2F3	20546761	1	1	BR:MDA_MB_231 6:39745390-43216372	LC:NCI_H522 6:40006812-44575692	FALSE	FALSE
	TREM1	54210	triggering receptor expressed on myeloid cells 1	6	41242998	41254457	6p21.1	0.37341	0.00357956	1	E2F3	20749053	1	1	BR:MDA_MB_231 6:39745390-43216372	LC:NCI_H522 6:40006812-44575692	FALSE	FALSE
	TREML2	79865	triggering receptor expressed on myeloid cells-like 2	6	41157551	41168925	6p21.1	0.0922229	0.483413	1	E2F3	20663606	1	1	BR:MDA_MB_231 6:39745390-43216372	LC:NCI_H522 6:40006812-44575692	FALSE	FALSE
	TREML4	285852	triggering receptor expressed on myeloid cells-like 4	6	41196061	41206120	6p21.1	0.0231141	0.862048	1	E2F3	20702116	1	1	BR:MDA_MB_231 6:39745390-43216372	LC:NCI_H522 6:40006812-44575692	FALSE	FALSE
	NCR2	9436	natural cytotoxicity triggering receptor 2	6	41303527	41318625	6p21.1	-0.142512	0.281595	1	E2F3	20809582	1	1	BR:MDA_MB_231 6:39745390-43216372	LC:NCI_H522 6:40006812-44575692	FALSE	FALSE
	MDFI	4188	MyoD family inhibitor	6	41606194	41621982	6p21.1	0.386848	0.00226333	1	E2F3	21112249	1	1	BR:MDA_MB_231 6:39745390-43216372	LC:NCI_H522 6:40006812-44575692	FALSE	FALSE
	PRICKLE4	29964	prickle homolog 4 (Drosophila)	6	41748499	41755110	6p21.1	0.21681	0.096126	1	E2F3	21254554	1	1	BR:MDA_MB_231 6:39745390-43216372	LC:NCI_H522 6:40006812-44575692	FALSE	FALSE
	TOMM6	100188893	translocase of outer mitochondrial membrane 6 homolog (yeast)	6	41755180	41757634	6p21.1	0.596993	4.78641e-07	0.00767262	E2F3	21261235	1	1	BR:MDA_MB_231 6:39745390-43216372	LC:NCI_H522 6:40006812-44575692	FALSE	FALSE
	PGC	5225	progastricsin (pepsinogen C)	6	41704448	41715139	6p21.1	0.42016	0.000831113	1	E2F3	21210503	1	1	BR:MDA_MB_231 6:39745390-43216372	LC:NCI_H522 6:40006812-44575692	FALSE	FALSE
	FRS3	10817	fibroblast growth factor receptor substrate 3	6	41737913	41747630	6p21.1	0.714689	2.05146e-10	3.63498e-06	E2F3	21243968	1	1	BR:MDA_MB_231 6:39745390-43216372	LC:NCI_H522 6:40006812-44575692	FALSE	FALSE
	BYSL	705	bystin-like	6	41888964	41900784	6p21.1	0.70875	2.357e-10	4.17071e-06	E2F3	21395019	1	1	BR:MDA_MB_231 6:39745390-43216372	LC:NCI_H522 6:40006812-44575692	FALSE	FALSE
	MED20	9477	mediator complex subunit 20	6	41873091	41888877	6p21.1	0.690405	1.03847e-09	1.81618e-05	E2F3	21379146	1	1	BR:MDA_MB_231 6:39745390-43216372	LC:NCI_H522 6:40006812-44575692	FALSE	FALSE
	TAF8	129685	TAF8 RNA polymerase II, TATA box binding protein (TBP)-associated factor, 43kDa	6	42018250	42048644	6p21.1	0.824243	5.92698e-16	1.09264e-11	E2F3	21524305	1	1	BR:MDA_MB_231 6:39745390-43216372	LC:NCI_H522 6:40006812-44575692	FALSE	FALSE
	GUCA1B	2979	guanylate cyclase activator 1B (retina)	6	42151021	42162694	6p21.1	0.579617	1.21791e-06	0.0191298	E2F3	21657076	1	1	BR:MDA_MB_231 6:39745390-43216372	LC:NCI_H522 6:40006812-44575692	FALSE	FALSE
	GUCA1A	2978	guanylate cyclase activator 1A (retina)	6	42123143	42147794	6p21.1	0.0172486	0.896832	1	E2F3	21629198	1	1	BR:MDA_MB_231 6:39745390-43216372	LC:NCI_H522 6:40006812-44575692	FALSE	FALSE
	MRPS10	55173	mitochondrial ribosomal protein S10	6	42174538	42185633	6p21.1	0.758109	2.31585e-12	4.20489e-08	E2F3	21680593	1	1	BR:MDA_MB_231 6:39745390-43216372	LC:NCI_H522 6:40006812-44575692	FALSE	FALSE
	PRPH2	5961	peripherin 2 (retinal degeneration, slow)	6	42664332	42690358	6p21.1	0.0949485	0.470523	1	E2F3	22170387	1	1	BR:MDA_MB_231 6:39745390-43216372	LC:NCI_H522 6:40006812-44575692	FALSE	FALSE
	TBCC	6903	tubulin folding cofactor C	6	42712233	42713884	6p21.1	0.793353	6.79057e-14	1.24458e-09	E2F3	22218288	1	1	BR:MDA_MB_231 6:39745390-43216372	LC:NCI_H522 6:40006812-44575692	FALSE	FALSE
	C6orf226	441150	chromosome 6 open reading frame 226	6	42858002	42858554	6p21.1	0.565261	2.5321e-06	0.0391259	E2F3	22364057	1	1	BR:MDA_MB_231 6:39745390-43216372	LC:NCI_H522 6:40006812-44575692	FALSE	FALSE
	RPL7L1	285855	ribosomal protein L7-like 1	6	42847670	42854731	6p21.1	0.796025	2.92499e-14	5.36706e-10	E2F3	22353725	1	1	BR:MDA_MB_231 6:39745390-43216372	LC:NCI_H522 6:40006812-44575692	FALSE	FALSE
	PEX6	5190	peroxisomal biogenesis factor 6	6	42931610	42946981	6p21.1	0.338882	0.00808203	1	E2F3	22437665	1	1	BR:MDA_MB_231 6:39745390-43216372	LC:NCI_H522 6:40006812-44575692	FALSE	FALSE
	GNMT	27232	glycine N-methyltransferase	6	42928499	42931618	6p21.1	0.470141	0.000171869	1	E2F3	22434554	1	1	BR:MDA_MB_231 6:39745390-43216372	LC:NCI_H522 6:40006812-44575692	FALSE	FALSE
	PTCRA	171558	pre T-cell antigen receptor alpha	6	42883726	42893575	6p21.1	0.0823463	0.531645	1	E2F3	22389781	1	1	BR:MDA_MB_231 6:39745390-43216372	LC:NCI_H522 6:40006812-44575692	FALSE	FALSE
	KLHDC3	116138	kelch domain containing 3	6	42981840	42989036	6p21.1	0.7058	3.01455e-10	5.32429e-06	E2F3	22487895	1	1	BR:MDA_MB_231 6:39745390-43216372	LC:NCI_H522 6:40006812-44575692	FALSE	FALSE
	PPP2R5D	5528	protein phosphatase 2, regulatory subunit B', delta	6	42952236	42980083	6p21.1	0.692518	8.80273e-10	1.54162e-05	E2F3	22458291	1	1	BR:MDA_MB_231 6:39745390-43216372	LC:NCI_H522 6:40006812-44575692	FALSE	FALSE
	MEA1	4201	male-enhanced antigen 1	6	42979966	42981618	6p21.1	0.773388	4.40266e-13	8.03618e-09	E2F3	22486021	1	1	BR:MDA_MB_231 6:39745390-43216372	LC:NCI_H522 6:40006812-44575692	FALSE	FALSE
	CNPY3	10695	canopy 3 homolog (zebrafish)	6	42896859	42907008	6p21.1	0.51881	2.169e-05	0.315697	E2F3	22402914	1	1	BR:MDA_MB_231 6:39745390-43216372	LC:NCI_H522 6:40006812-44575692	FALSE	FALSE
	CUL7	9820	cullin 7	6	43005354	43021683	6p21.1	0.434555	0.000521745	1	E2F3	22511409	1	1	BR:MDA_MB_231 6:39745390-43216372	LC:NCI_H522 6:40006812-44575692	FALSE	FALSE
	MRPL2	51069	mitochondrial ribosomal protein L2	6	43021766	43027242	6p21.1	0.471096	0.000166008	1	E2F3	22527821	1	1	BR:MDA_MB_231 6:39745390-43216372	LC:NCI_H522 6:40006812-44575692	FALSE	FALSE
	KLC4	89953	kinesin light chain 4	6	43027371	43042833	6p21.1	0.261966	0.043181	1	E2F3	22533426	1	1	BR:MDA_MB_231 6:39745390-43216372	LC:NCI_H522 6:40006812-44575692	FALSE	FALSE
	CUL9	23113	cullin 9	6	43149921	43192325	6p21.1	0.488944	7.37079e-05	1	E2F3	22655976	1	1	BR:MDA_MB_231 6:39745390-43216372	LC:NCI_H522 6:40006812-44575692	FALSE	FALSE
	SRF	6722	serum response factor (c-fos serum response element-binding transcription factor)	6	43138919	43149244	6p21.1	0.713274	1.60654e-10	2.85192e-06	E2F3	22644974	1	1	BR:MDA_MB_231 6:39745390-43216372	LC:NCI_H522 6:40006812-44575692	FALSE	FALSE
	CRIP3	401262	cysteine-rich protein 3	6	43273210	43276530	6p21.1	-0.0207841	0.875839	1	E2F3	22779265	0	1		LC:NCI_H522 6:40006812-44575692	FALSE	FALSE
	SLC22A7	10864	solute carrier family 22 (organic anion transporter), member 7	6	43265997	43273276	6p21.1	0.079691	0.548522	1	E2F3	22772052	0	1		LC:NCI_H522 6:40006812-44575692	FALSE	FALSE
	ZNF318	24149	zinc finger protein 318	6	43303807	43337181	6p21.1	0.418189	0.000884414	1	E2F3	22809862	0	1		LC:NCI_H522 6:40006812-44575692	FALSE	FALSE
	ABCC10	89845	ATP-binding cassette, sub-family C (CFTR/MRP), member 10	6	43395291	43418163	6p21.1	0.450722	0.000301623	1	E2F3	22901346	0	1		LC:NCI_H522 6:40006812-44575692	FALSE	FALSE
	TJAP1	93643	tight junction associated protein 1 (peripheral)	6	43445260	43474294	6p21.1	0.596859	4.8219e-07	0.00772758	E2F3	22951315	0	1		LC:NCI_H522 6:40006812-44575692	FALSE	FALSE
	DLK2	65989	delta-like 2 homolog (Drosophila)	6	43418089	43423786	6p21.1	0.0521057	0.692557	1	E2F3	22924144	0	1		LC:NCI_H522 6:40006812-44575692	FALSE	FALSE
	POLR1C	9533	polymerase (RNA) I polypeptide C, 30kDa	6	43484776	43489246	6p21.1	0.400502	0.00151975	1	E2F3	22990831	0	1		LC:NCI_H522 6:40006812-44575692	FALSE	FALSE
	YIPF3	25844	Yip1 domain family, member 3	6	43479564	43484728	6p21.1	0.451203	0.000296625	1	E2F3	22985619	0	1		LC:NCI_H522 6:40006812-44575692	FALSE	FALSE
	RSPH9	221421	radial spoke head 9 homolog (Chlamydomonas)	6	43612766	43638748	6p21.1	0.15803	0.231927	1	E2F3	23118821	0	1		LC:NCI_H522 6:40006812-44575692	FALSE	FALSE
	MAD2L1BP	9587	MAD2L1 binding protein	6	43597278	43608688	6p21.1	0.363928	0.00425783	1	E2F3	23103333	0	1		LC:NCI_H522 6:40006812-44575692	FALSE	FALSE
	POLH	5429	polymerase (DNA directed), eta	6	43543877	43588260	6p21.1	0.592844	6.01208e-07	0.00958866	E2F3	23049932	0	1		LC:NCI_H522 6:40006812-44575692	FALSE	FALSE
	GTPBP2	54676	GTP binding protein 2	6	43588217	43596936	6p21.1	0.71617	1.25208e-10	2.22657e-06	E2F3	23094272	0	1		LC:NCI_H522 6:40006812-44575692	FALSE	FALSE
	VEGFA	7422	vascular endothelial growth factor A	6	43737945	43754223	6p21.1	0.272448	0.0352046	1	E2F3	23244000	0	1		LC:NCI_H522 6:40006812-44575692	FALSE	FALSE
	LOC100132354	100132354	hypothetical LOC100132354	6	43858764	43905944	6p21.1	0.0449658	0.735235	1	E2F3	23364819	0	1		LC:NCI_H522 6:40006812-44575692	FALSE	FALSE
	C6orf223	221416	chromosome 6 open reading frame 223	6	43968336	43973694	6p21.1	-0.0741683	0.573301	1	E2F3	23474391	0	1		LC:NCI_H522 6:40006812-44575692	FALSE	FALSE
	MRPL14	64928	mitochondrial ribosomal protein L14	6	44081372	44095191	6p21.1	0.627068	8.28938e-08	0.00137231	E2F3	23587427	0	1		LC:NCI_H522 6:40006812-44575692	FALSE	FALSE
	TMEM63B	55362	transmembrane protein 63B	6	44095375	44123256	6p21.1	0.18295	0.161766	1	E2F3	23601430	0	1		LC:NCI_H522 6:40006812-44575692	FALSE	FALSE
	CAPN11	11131	calpain 11	6	44126547	44152139	6p21.1	0.203674	0.121805	1	E2F3	23632602	0	1		LC:NCI_H522 6:40006812-44575692	FALSE	FALSE
	HSP90AB1	3326	heat shock protein 90kDa alpha (cytosolic), class B member 1	6	44213902	44221625	6p21.1	0.51776	2.67314e-05	0.386322	E2F3	23719957	0	1		LC:NCI_H522 6:40006812-44575692	FALSE	FALSE
	SLC35B2	347734	solute carrier family 35, member B2	6	44221837	44225283	6p21.1	0.347634	0.00649728	1	E2F3	23727892	0	1		LC:NCI_H522 6:40006812-44575692	FALSE	FALSE
	SLC29A1	2030	solute carrier family 29 (nucleoside transporters), member 1	6	44187241	44201888	6p21.1	0.410193	0.00113381	1	E2F3	23693296	0	1		LC:NCI_H522 6:40006812-44575692	FALSE	FALSE
	AARS2	57505	alanyl-tRNA synthetase 2, mitochondrial (putative)	6	44266462	44281063	6p21.1	0.405889	0.00129274	1	E2F3	23772517	0	1		LC:NCI_H522 6:40006812-44575692	FALSE	FALSE
	NFKBIE	4794	nuclear factor of kappa light polypeptide gene enhancer in B-cells inhibitor, epsilon	6	44225902	44233525	6p21.1	0.50698	3.56974e-05	0.511437	E2F3	23731957	0	1		LC:NCI_H522 6:40006812-44575692	FALSE	FALSE
	TCTE1	202500	t-complex-associated-testis-expressed 1	6	44247896	44265458	6p21.1	0.0277308	0.834849	1	E2F3	23753951	0	1		LC:NCI_H522 6:40006812-44575692	FALSE	FALSE
	TMEM151B	441151	transmembrane protein 151B	6	44238479	44247182	6p21.1	0.264845	0.0485415	1	E2F3	23744534	0	1		LC:NCI_H522 6:40006812-44575692	FALSE	FALSE
	SPATS1	221409	spermatogenesis associated, serine-rich 1	6	44310396	44344904	6p21.1	0.179713	0.173203	1	E2F3	23816451	0	1		LC:NCI_H522 6:40006812-44575692	FALSE	FALSE
	CDC5L	988	CDC5 cell division cycle 5-like (S. pombe)	6	44355250	44418161	6p21.1	0.679478	2.38809e-09	4.14405e-05	E2F3	23861305	0	1		LC:NCI_H522 6:40006812-44575692	FALSE	FALSE
	KIAA1586	57691	KIAA1586	6	56911383	56920023	6p12.1	0.425225	0.000707186	1	TTK	23794298	0	1		LC:NCI_H522 6:55926912-57328607	FALSE	FALSE
	RAB23	51715	RAB23, member RAS oncogene family	6	57053581	57087078	6p11.2	0.567407	2.27461e-06	0.0352496	TTK	23627243	0	1		LC:NCI_H522 6:55926912-57328607	FALSE	FALSE
	BAG2	9532	BCL2-associated athanogene 2	6	57037103	57050012	6p11.2	0.135738	0.301091	1	TTK	23664309	0	1		LC:NCI_H522 6:55926912-57328607	FALSE	FALSE
	LGSN	51557	lengsin, lens protein with glutamine synthetase domain	6	63985855	64029882	6q12	0.0648741	0.622393	1	TTK	16684439	1	1	BR:T47D 6:63953519-66923930	PR:RC01 6:62738088-66292128	FALSE	FALSE
	PTP4A1	7803	protein tyrosine phosphatase type IVA, member 1	6	64281919	64293489	6q12	0.259096	0.0456076	1	TTK	16420832	2	1	BR:T47D 6:63953519-66923930,CO:COLO205 6:64084170-68225087	PR:RC01 6:62738088-66292128	FALSE	FALSE
	PHF3	23469	PHD finger protein 3	6	64356430	64424405	6q12	0.699819	4.9192e-10	8.65632e-06	TTK	16289916	2	1	BR:T47D 6:63953519-66923930,CO:COLO205 6:64084170-68225087	PR:RC01 6:62738088-66292128	FALSE	FALSE
	KHDC1	80759	KH homology domain containing 1	6	73951037	74019938	6q13	0.187224	0.152023	1	TTK	6694383	1	1	LC:HOP_62 6:70584770-74942334	OV:SK_OV_3 6:72594699-75029039	FALSE	FALSE
	C6orf147	387097	chromosome 6 open reading frame 147	6	73983861	74020088	6q13	0.418561	0.000969856	1	TTK	6694233	1	1	LC:HOP_62 6:70584770-74942334	OV:SK_OV_3 6:72594699-75029039	FALSE	FALSE
	KHDC1L	100129128	KH homology domain containing 1-like	6	73933267	73935175	6q13	0.242125	0.0623386	1	TTK	6779146	1	1	LC:HOP_62 6:70584770-74942334	OV:SK_OV_3 6:72594699-75029039	FALSE	FALSE
	OOEP	441161	oocyte expressed protein homolog (dog)	6	74078279	74079515	6q13	0.272875	0.0349074	1	TTK	6634806	1	1	LC:HOP_62 6:70584770-74942334	OV:SK_OV_3 6:72594699-75029039	FALSE	FALSE
	DPPA5	340168	developmental pluripotency associated 5	6	74062784	74063999	6q13	0.152453	0.24903	1	TTK	6650322	1	1	LC:HOP_62 6:70584770-74942334	OV:SK_OV_3 6:72594699-75029039	FALSE	FALSE
	DDX43	55510	DEAD (Asp-Glu-Ala-Asp) box polypeptide 43	6	74104284	74127289	6q13	0.195147	0.138563	1	TTK	6587032	1	1	LC:HOP_62 6:70584770-74942334	OV:SK_OV_3 6:72594699-75029039	FALSE	FALSE
	EEF1A1	1915	eukaryotic translation elongation factor 1 alpha 1	6	74225472	74230755	6q13	0.728185	6.33377e-11	1.13159e-06	TTK	6483566	1	1	LC:HOP_62 6:70584770-74942334	OV:SK_OV_3 6:72594699-75029039	FALSE	FALSE
	RWDD2A	112611	RWD domain containing 2A	6	83903031	83906256	6q14.2	0.51657	2.38699e-05	0.346281	TTK	3150787	0	1		LE:RPMI_8226 6:83899442-84046737	FALSE	FALSE
	COQ3	51805	coenzyme Q3 homolog, methyltransferase (S. cerevisiae)	6	99817347	99842082	6q16.2	0.309122	0.0172058	1	PRDM1	6692112	0	1		CO:SW_620 6:99781820-99938396	FALSE	FALSE
	USP45	85015	ubiquitin specific peptidase 45	6	99880183	99963252	6q16.2	0.505742	4.38956e-05	0.624898	PRDM1	6570942	0	1		CO:SW_620 6:99781820-99938396	FALSE	FALSE
	TMEM200A	114801	transmembrane protein 200A	6	130687425	130764210	6q23.1	0.215782	0.0977524	1	TNFAIP3	7424114	0	1		LC:HOP_92 6:129003474-132326265	FALSE	FALSE
	MED23	9439	mediator complex subunit 23	6	131895105	131949379	6q23.2	0.773079	4.55893e-13	8.32049e-09	TNFAIP3	6238945	0	1		LC:HOP_92 6:129003474-132326265	FALSE	FALSE
	ARG1	383	arginase, liver	6	131894343	131905472	6q23.2	0.0396055	0.763836	1	TNFAIP3	6282852	0	1		LC:HOP_92 6:129003474-132326265	FALSE	FALSE
	CTAGE9	643854	CTAGE family, member 9	6	132029580	132032157	6q23.2	-0.0196597	0.881479	1	TNFAIP3	6156167	0	1		LC:HOP_92 6:129003474-132326265	FALSE	FALSE
	ENPP1	5167	ectonucleotide pyrophosphatase/phosphodiesterase 1	6	132129155	132216295	6q23.2	0.0384544	0.77051	1	TNFAIP3	5972029	0	1		LC:HOP_92 6:129003474-132326265	FALSE	FALSE
	CTGF	1490	connective tissue growth factor	6	132269316	132272518	6q23.2	0.152887	0.243527	1	TNFAIP3	5915806	0	1		LC:HOP_92 6:129003474-132326265	FALSE	FALSE
	NMBR	4829	neuromedin B receptor	6	142396744	142409936	6q24.1	0.184457	0.161944	1	TNFAIP3	4192293	0	1		CNS:SF_268 6:142380247-142665224	FALSE	FALSE
	BBS9	27241	Bardet-Biedl syndrome 9	7	33169151	33645680	7p14.3	0.34041	0.00778336	1	EZH2	114858783	0	1		ME:LOXIMVI 7:33555049-33832519	FALSE	FALSE
	CTTNBP2	83992	cortactin binding protein 2	7	117350705	117513561	7q31.2:7q31.31	0.310824	0.015641	1	EZH2	30990902	0	1		LC:NCI_H522 7:114172474-117438553	FALSE	FALSE
	SDK1	221935	sidekick homolog 1, cell adhesion molecule (chicken)	7	3341079	4308631	7p22.2	0.261813	0.0433073	1	EZH2	144195832	0	1		OV:OVCAR_5 7:3868493-3910372	FALSE	FALSE
	CALN1	83698	calneuron 1	7	71244475	71877360	7q11.22	-0.0596058	0.650985	1	EZH2	76627103	0	1		OV:OVCAR_3 7:71168814-75635467	FALSE	FALSE
	POM121	9883	POM121 membrane glycoprotein	7	72349935	72421979	7q11.23	0.697582	8.28948e-10	1.45232e-05	EZH2	76082484	0	1		OV:OVCAR_3 7:71168814-75635467	FALSE	FALSE
	ZKSCAN1	7586	zinc finger with KRAB and SCAN domains 1	7	99613218	99635403	7q22.1	0.677204	2.8272e-09	4.90011e-05	EZH2	48869060	0	1		LC:NCI_H322M 7:99272370-101526886	FALSE	FALSE
	CUX1	1523	cut-like homeobox 1	7	101459183	101927250	7q22.1	0.672832	3.89532e-09	6.72604e-05	EZH2	46577213	0	1		LC:NCI_H322M 7:99272370-101526886	FALSE	FALSE
	FOXP2	93986	forkhead box P2	7	113726364	114333827	7q31.1	0.104344	0.427537	1	EZH2	34170636	0	1		LC:NCI_H522 7:114172474-117438553	FALSE	FALSE
	GATA2	2624	GATA binding protein 2	3	128198264	128212030	3q21.3	-0.127809	0.330464	1	SI	36484655	1	0	RE:RXF_393 3:127669518-128598794		FALSE	FALSE
	MKLN1	4289	muskelin 1, intracellular mediator containing kelch motifs	7	130794854	131181398	7q32.3	0.754598	5.12368e-12	9.2713e-08	EZH2	17323065	0	1		LE:HL_60 7:130812484-131036459	FALSE	FALSE
	PLXNA4	91584	plexin A4	7	131808090	132333447	7q32.3	0.0784246	0.551433	1	EZH2	16171016	0	1		LC:NCI_H460 7:131866042-131929918	FALSE	FALSE
	NUP205	23165	nucleoporin 205kDa	7	135242661	135333499	7q33	0.761144	1.68187e-12	3.05799e-08	EZH2	13170964	0	1		LC:NCI_H226 7:134226900-135244069	FALSE	FALSE
	MLL3	58508	myeloid/lymphoid or mixed-lineage leukemia 3	7	151832009	152133090	7q36.1	0.7012	4.39812e-10	7.74553e-06	MLL3	0	0	1		OV:IGROV1 7:151819905-152002720	FALSE	FALSE
	RPA3	6119	replication protein A3, 14kDa	7	7676574	7758238	7p21.3	0.404445	0.00135041	1	EZH2	140746225	0	1		RE:SN12C 7:7681302-7938796	FALSE	FALSE
	LOC729852	729852	hypothetical LOC729852	7	7680341	7918851	7p21.3	0.633767	5.46631e-08	0.000911561	EZH2	140585612	0	1		RE:SN12C 7:7681302-7938796	FALSE	FALSE
	ABCB5	340273	ATP-binding cassette, sub-family B (MDR/TAP), member 5	7	20655244	20796637	7p21.1	-0.0356643	0.786753	1	EZH2	127707826	0	1		LC:NCI_H322M 7:20312504-20840580	FALSE	FALSE
	ITGB8	3696	integrin, beta 8	7	20370724	20455382	7p21.1	-0.0401666	0.760589	1	EZH2	128049081	0	1		LC:NCI_H322M 7:20312504-20840580	FALSE	FALSE
	LOC441242	441242	hypothetical LOC441242	7	65111923	65235797	7q11.21	-0.0870295	0.512192	1	EZH2	83268666	0	1		CNS:SNB_75 7:64686144-65171017	FALSE	FALSE
	WBSCR17	64409	Williams-Beuren syndrome chromosome region 17	7	70597522	71178586	7q11.22	-0.0891917	0.497965	1	EZH2	77325877	0	1		OV:OVCAR_3 7:71168814-75635467	FALSE	FALSE
	TYW1B	441250	tRNA-yW synthesizing protein 1 homolog B (S. cerevisiae)	7	72023728	72298813	7q11.22:7q11.23	0.429367	0.000690138	1	EZH2	76205650	0	1		OV:OVCAR_3 7:71168814-75635467	FALSE	FALSE
	FKBP6	8468	FK506 binding protein 6, 36kDa	7	72742154	72772641	7q11.23	-0.100385	0.449355	1	EZH2	75731822	0	1		OV:OVCAR_3 7:71168814-75635467	FALSE	FALSE
	BAZ1B	9031	bromodomain adjacent to zinc finger domain, 1B	7	72854727	72936615	7q11.23	0.776966	2.92943e-13	5.35442e-09	EZH2	75567848	0	1		OV:OVCAR_3 7:71168814-75635467	FALSE	FALSE
	LOC100093631	100093631	general transcription factor II, i, pseudogene	7	72569011	74653459	7q11.23	0.606058	2.87567e-07	0.00466088	EZH2	73851004	0	1		OV:OVCAR_3 7:71168814-75635467	FALSE	FALSE
	RFC2	5982	replication factor C (activator 1) 2, 40kDa	7	73645831	73668738	7q11.23	0.671456	4.3041e-09	7.42329e-05	EZH2	74835725	0	1		OV:OVCAR_3 7:71168814-75635467	FALSE	FALSE
	CLIP2	7461	CAP-GLY domain containing linker protein 2	7	73703804	73820273	7q11.23	0.26975	0.0371299	1	EZH2	74684190	0	1		OV:OVCAR_3 7:71168814-75635467	FALSE	FALSE
	LIMK1	3984	LIM domain kinase 1	7	73498106	73536855	7q11.23	0.323775	0.011617	1	EZH2	74967608	0	1		OV:OVCAR_3 7:71168814-75635467	FALSE	FALSE
	GTF2IRD1	9569	GTF2I repeat domain containing 1	7	73868119	74016920	7q11.23	0.216741	0.0962342	1	EZH2	74487543	0	1		OV:OVCAR_3 7:71168814-75635467	FALSE	FALSE
	PMS2P5	5383	postmeiotic segregation increased 2 pseudogene 5	7	74306893	74336166	7q11.23	0.512386	2.84937e-05	0.410936	EZH2	74168297	0	1		OV:OVCAR_3 7:71168814-75635467	FALSE	FALSE
	HIP1	3092	huntingtin interacting protein 1	7	75162618	75368283	7q11.23	0.380594	0.00270131	1	EZH2	73136180	0	1		OV:OVCAR_3 7:71168814-75635467	FALSE	FALSE
	NCF1C	654817	neutrophil cytosolic factor 1C pseudogene	7	74572383	74587816	7q11.23	0.000182836	0.998903	1	EZH2	73916647	0	1		OV:OVCAR_3 7:71168814-75635467	FALSE	FALSE
	POM121C	100101267	POM121 membrane glycoprotein C	7	75046064	75115568	7q11.23	0.605689	3.7212e-07	0.00599522	EZH2	73388895	0	1		OV:OVCAR_3 7:71168814-75635467	FALSE	FALSE
	STYXL1	51657	serine/threonine/tyrosine interacting-like 1	7	75625654	75677321	7q11.23	0.516135	2.86175e-05	0.412694	EZH2	72827142	0	1		OV:OVCAR_3 7:71168814-75635467	FALSE	FALSE
	SEMA3C	10512	sema domain, immunoglobulin domain (Ig), short basic domain, secreted, (semaphorin) 3C	7	80371853	80548667	7q21.11	0.152102	0.245984	1	EZH2	67955796	0	1		LC:NCI_H322M 7:80395234-81537307	FALSE	FALSE
	HGF	3082	hepatocyte growth factor (hepapoietin A; scatter factor)	7	81331443	81399452	7q21.11	0.171429	0.190309	1	EZH2	67105011	0	1		LC:NCI_H322M 7:80395234-81537307	FALSE	FALSE
	ADAM22	53616	ADAM metallopeptidase domain 22	7	87563565	87832204	7q21.12	0.0865348	0.510904	1	EZH2	60672259	0	1		OV:NCI_ADR_RES 7:87402290-87981932	FALSE	FALSE
	RUNDC3B	154661	RUN domain containing 3B	7	87257728	87461613	7q21.12	0.659878	1.31016e-08	0.000223055	EZH2	61042850	0	1		OV:NCI_ADR_RES 7:87402290-87981932	FALSE	FALSE
	CALCR	799	calcitonin receptor	7	93053798	93204042	7q21.3	0.164376	0.209471	1	EZH2	55300421	0	1		LC:NCI_H460 7:92614766-95002898	FALSE	FALSE
	CCDC132	55610	coiled-coil domain containing 132	7	92861652	92990435	7q21.3	0.689219	1.13868e-09	1.98984e-05	EZH2	55514028	0	1		LC:NCI_H460 7:92614766-95002898	FALSE	FALSE
	SGCE	8910	sarcoglycan, epsilon	7	94214535	94285521	7q21.3	0.156222	0.233273	1	EZH2	54218942	0	1		LC:NCI_H460 7:92614766-95002898	FALSE	FALSE
	PPP1R9A	55607	protein phosphatase 1, regulatory (inhibitor) subunit 9A	7	94536948	94925727	7q21.3	0.040313	0.759742	1	EZH2	53578736	0	1		LC:NCI_H460 7:92614766-95002898	FALSE	FALSE
	AGFG2	3268	ArfGAP with FG repeats 2	7	100136833	100165843	7q22.1	0.422061	0.000869738	1	EZH2	48338620	0	1		LC:NCI_H322M 7:99272370-101526886	FALSE	FALSE
	EPHB4	2050	EPH receptor B4	7	100400186	100425143	7q22.1	0.369691	0.00364762	1	EZH2	48079320	0	1		LC:NCI_H322M 7:99272370-101526886	FALSE	FALSE
	ZCWPW1	55063	zinc finger, CW type with PWWP domain 1	7	99998494	100026431	7q22.1	0.119873	0.361615	1	EZH2	48478032	0	1		LC:NCI_H322M 7:99272370-101526886	FALSE	FALSE
	LRRN3	54674	leucine rich repeat neuronal 3	7	110731061	110765509	7q31.1	0.171871	0.189151	1	EZH2	37738954	0	1		RE:RXF_393 7:110405738-110785645	FALSE	FALSE
	TES	26136	testis derived transcript (3 LIM domains)	7	115850546	115898837	7q31.2	0.196261	0.132862	1	EZH2	32605626	0	1		LC:NCI_H522 7:114172474-117438553	FALSE	FALSE
	TFEC	22797	transcription factor EC	7	115575201	115670867	7q31.2	-0.0975009	0.458621	1	EZH2	32833596	0	1		LC:NCI_H522 7:114172474-117438553	FALSE	FALSE
	CFTR	1080	cystic fibrosis transmembrane conductance regulator (ATP-binding cassette sub-family C, member 7)	7	117120016	117308718	7q31.2	0.150279	0.251756	1	EZH2	31195745	0	1		LC:NCI_H522 7:114172474-117438553	FALSE	FALSE
	ASZ1	136991	ankyrin repeat, SAM and basic leucine zipper domain containing 1	7	117003275	117067577	7q31.2	-0.0203387	0.878479	1	EZH2	31436886	0	1		LC:NCI_H522 7:114172474-117438553	FALSE	FALSE
	CAPZA2	830	capping protein (actin filament) muscle Z-line, alpha 2	7	116502562	116559313	7q31.2	0.812601	3.20531e-15	5.90225e-11	EZH2	31945150	0	1		LC:NCI_H522 7:114172474-117438553	FALSE	FALSE
	ST7	7982	suppression of tumorigenicity 7	7	116593380	116870075	7q31.2	0.566091	2.42948e-06	0.0375962	EZH2	31634388	0	1		LC:NCI_H522 7:114172474-117438553	FALSE	FALSE
	KCND2	3751	potassium voltage-gated channel, Shal-related subfamily, member 2	7	119913721	120390387	7q31.31	-0.0731445	0.581942	1	EZH2	28114076	0	1		LC:NCI_H460 7:120005351-120081138	FALSE	FALSE
	CALD1	800	caldesmon 1	7	134464163	134655480	7q33	0.204729	0.116617	1	EZH2	13848983	0	1		LC:NCI_H226 7:134226900-135244069	FALSE	FALSE
	CNOT4	4850	CCR4-NOT transcription complex, subunit 4	7	135046546	135194875	7q33	0.587885	9.79906e-07	0.0154629	EZH2	13309588	0	1		LC:NCI_H226 7:134226900-135244069	FALSE	FALSE
	WDR91	29062	WD repeat domain 91	7	134868589	134896316	7q33	0.390027	0.00206595	1	EZH2	13608147	0	1		LC:NCI_H226 7:134226900-135244069	FALSE	FALSE
	BPGM	669	2,3-bisphosphoglycerate mutase	7	134331530	134364567	7q33	0.357852	0.00499721	1	EZH2	14139896	0	1		LC:NCI_H226 7:134226900-135244069	FALSE	FALSE
	AGBL3	340351	ATP/GTP binding protein-like 3	7	134671258	134820530	7q33	0.360497	0.00503528	1	EZH2	13683933	0	1		LC:NCI_H226 7:134226900-135244069	FALSE	FALSE
	SP8	221833	Sp8 transcription factor	7	20821893	20826508	7p21.1	0.0295616	0.824114	1	EZH2	127677955	0	1		LC:NCI_H322M 7:20312504-20840580	FALSE	FALSE
	HERPUD2	64224	HERPUD family member 2	7	35672269	35734772	7p14.2	0.689141	1.14561e-09	2.00149e-05	EZH2	112769691	0	1		CO:SW_620 7:35705698-35818424	FALSE	FALSE
	ZNF92	168374	zinc finger protein 92	7	64838767	64865998	7q11.21	0.67108	4.42253e-09	7.62489e-05	EZH2	83638465	0	1		CNS:SNB_75 7:64686144-65171017	FALSE	FALSE
	SBDSP1	155370	Shwachman-Bodian-Diamond syndrome pseudogene 1	7	72299951	72307978	7q11.23	0.631418	6.3329e-08	0.00105322	EZH2	76196485	0	1		OV:OVCAR_3 7:71168814-75635467	FALSE	FALSE
	SPDYE7P	441251	speedy homolog E7 (Xenopus laevis), pseudogene	7	72333317	72339655	7q11.23	0.369309	0.00399523	1	EZH2	76164808	0	1		OV:OVCAR_3 7:71168814-75635467	FALSE	FALSE
	NSUN5P2	260294	NOP2/Sun domain family, member 5 pseudogene 2	7	72418831	72425302	7q11.23	0.455489	0.000288992	1	EZH2	76079161	0	1		OV:OVCAR_3 7:71168814-75635467	FALSE	FALSE
	NSUN5	55695	NOP2/Sun domain family, member 5	7	72716513	72722864	7q11.23	0.484478	8.7657e-05	1	EZH2	75781599	0	1		OV:OVCAR_3 7:71168814-75635467	FALSE	FALSE
	TRIM50	135892	tripartite motif containing 50	7	72726534	72742085	7q11.23	-0.14143	0.285301	1	EZH2	75762378	0	1		OV:OVCAR_3 7:71168814-75635467	FALSE	FALSE
	FZD9	8326	frizzled homolog 9 (Drosophila)	7	72848108	72850450	7q11.23	0.586183	1.07168e-06	0.0168822	EZH2	75654013	0	1		OV:OVCAR_3 7:71168814-75635467	FALSE	FALSE
	BCL7B	9275	B-cell CLL/lymphoma 7B	7	72950682	72972065	7q11.23	0.756062	2.86606e-12	5.1996e-08	EZH2	75532398	0	1		OV:OVCAR_3 7:71168814-75635467	FALSE	FALSE
	TBL2	26608	transducin (beta)-like 2	7	72983276	72993013	7q11.23	0.725365	5.55844e-11	9.93794e-07	EZH2	75511450	0	1		OV:OVCAR_3 7:71168814-75635467	FALSE	FALSE
	STX1A	6804	syntaxin 1A (brain)	7	73113534	73134017	7q11.23	0.312444	0.0150799	1	EZH2	75370446	0	1		OV:OVCAR_3 7:71168814-75635467	FALSE	FALSE
	DNAJC30	84277	DnaJ (Hsp40) homolog, subfamily C, member 30	7	73095247	73097781	7q11.23	0.632604	5.88052e-08	0.000979284	EZH2	75406682	0	1		OV:OVCAR_3 7:71168814-75635467	FALSE	FALSE
	VPS37D	155382	vacuolar protein sorting 37 homolog D (S. cerevisiae)	7	73082173	73086440	7q11.23	-0.182269	0.170874	1	EZH2	75418023	0	1		OV:OVCAR_3 7:71168814-75635467	FALSE	FALSE
	MLXIPL	51085	MLX interacting protein-like	7	73007523	73038870	7q11.23	-0.0937475	0.47618	1	EZH2	75465593	0	1		OV:OVCAR_3 7:71168814-75635467	FALSE	FALSE
	WBSCR22	114049	Williams Beuren syndrome chromosome region 22	7	73097897	73112551	7q11.23	0.674534	4.69973e-09	8.09669e-05	EZH2	75391912	0	1		OV:OVCAR_3 7:71168814-75635467	FALSE	FALSE
	CLDN3	1365	claudin 3	7	73183326	73184600	7q11.23	0.0105563	0.936197	1	EZH2	75319863	0	1		OV:OVCAR_3 7:71168814-75635467	FALSE	FALSE
	CLDN4	1364	claudin 4	7	73245192	73247015	7q11.23	-0.00957998	0.942087	1	EZH2	75257448	0	1		OV:OVCAR_3 7:71168814-75635467	FALSE	FALSE
	ABHD11	83451	abhydrolase domain containing 11	7	73150424	73153190	7q11.23	0.393789	0.00185236	1	EZH2	75351273	0	1		OV:OVCAR_3 7:71168814-75635467	FALSE	FALSE
	WBSCR27	155368	Williams Beuren syndrome chromosome region 27	7	73248920	73256855	7q11.23	0.334148	0.00907219	1	EZH2	75247608	0	1		OV:OVCAR_3 7:71168814-75635467	FALSE	FALSE
	WBSCR28	135886	Williams-Beuren syndrome chromosome region 28	7	73275488	73280223	7q11.23	-0.153315	0.246331	1	EZH2	75224240	0	1		OV:OVCAR_3 7:71168814-75635467	FALSE	FALSE
	ELN	2006	elastin	7	73442426	73484236	7q11.23	-0.266782	0.0410992	1	EZH2	75020227	0	1		OV:OVCAR_3 7:71168814-75635467	FALSE	FALSE
	LAT2	7462	linker for activation of T cells family, member 2	7	73624086	73644164	7q11.23	0.0841526	0.52265	1	EZH2	74860299	0	1		OV:OVCAR_3 7:71168814-75635467	FALSE	FALSE
	EIF4H	7458	eukaryotic translation initiation factor 4H	7	73588705	73611429	7q11.23	0.58786	9.81176e-07	0.015481	EZH2	74893034	0	1		OV:OVCAR_3 7:71168814-75635467	FALSE	FALSE
	GTF2I	2969	general transcription factor IIi	7	74072029	74175022	7q11.23	0.706962	2.73702e-10	4.83686e-06	EZH2	74329441	0	1		OV:OVCAR_3 7:71168814-75635467	FALSE	FALSE
	NCF1	653361	neutrophil cytosolic factor 1	7	74188308	74203659	7q11.23	0.210338	0.109817	1	EZH2	74300804	0	1		OV:OVCAR_3 7:71168814-75635467	FALSE	FALSE
	GTF2IRD2	84163	GTF2I repeat domain containing 2	7	74210483	74267841	7q11.23	0.0566822	0.669808	1	EZH2	74236622	0	1		OV:OVCAR_3 7:71168814-75635467	FALSE	FALSE
	STAG3L2	442582	stromal antigen 3-like 2	7	74298262	74306731	7q11.23	0.433189	0.000545802	1	EZH2	74197732	0	1		OV:OVCAR_3 7:71168814-75635467	FALSE	FALSE
	GATSL1	389523	GATS protein-like 1	7	74379082	74438803	7q11.23	0.202863	0.120058	1	EZH2	74065660	0	1		OV:OVCAR_3 7:71168814-75635467	FALSE	FALSE
	WBSCR16	81554	Williams-Beuren syndrome chromosome region 16	7	74456282	74489699	7q11.23	0.686386	1.41648e-09	2.46977e-05	EZH2	74014764	0	1		OV:OVCAR_3 7:71168814-75635467	FALSE	FALSE
	GTF2IRD2B	389524	GTF2I repeat domain containing 2B	7	74508346	74565623	7q11.23	-0.130987	0.322726	1	EZH2	73938840	0	1		OV:OVCAR_3 7:71168814-75635467	FALSE	FALSE
	STAG3L1	54441	stromal antigen 3-like 1	7	74988428	74996914	7q11.23	0.353148	0.00564497	1	EZH2	73507549	0	1		OV:OVCAR_3 7:71168814-75635467	FALSE	FALSE
	TRIM73	375593	tripartite motif containing 73	7	75024902	75034888	7q11.23	-0.120862	0.36185	1	EZH2	73469575	0	1		OV:OVCAR_3 7:71168814-75635467	FALSE	FALSE
	SPDYE5	442590	speedy homolog E5 (Xenopus laevis)	7	75124298	75133628	7q11.23	0.37372	0.00354972	1	EZH2	73370835	0	1		OV:OVCAR_3 7:71168814-75635467	FALSE	FALSE
	PMS2P3	5387	postmeiotic segregation increased 2 pseudogene 3	7	75137068	75157453	7q11.23	0.733198	4.02085e-11	7.20656e-07	EZH2	73347010	0	1		OV:OVCAR_3 7:71168814-75635467	FALSE	FALSE
	CCL24	6369	chemokine (C-C motif) ligand 24	7	75441113	75443033	7q11.23	-0.104549	0.434785	1	EZH2	73061430	0	1		OV:OVCAR_3 7:71168814-75635467	FALSE	FALSE
	CCL26	10344	chemokine (C-C motif) ligand 26	7	75398841	75419064	7q11.23	0.0760628	0.563518	1	EZH2	73085399	0	1		OV:OVCAR_3 7:71168814-75635467	FALSE	FALSE
	POR	5447	P450 (cytochrome) oxidoreductase	7	75544419	75616173	7q11.23	0.491211	6.74364e-05	0.945054	EZH2	72888290	0	1		OV:OVCAR_3 7:71168814-75635467	FALSE	FALSE
	RHBDD2	57414	rhomboid domain containing 2	7	75508316	75518244	7q11.23	0.64062	3.53335e-08	0.000593108	EZH2	72986219	0	1		OV:OVCAR_3 7:71168814-75635467	FALSE	FALSE
	TMEM120A	83862	transmembrane protein 120A	7	75616154	75623992	7q11.23	0.614221	1.79281e-07	0.00293053	EZH2	72880471	0	1		OV:OVCAR_3 7:71168814-75635467	FALSE	FALSE
	DBF4	10926	DBF4 homolog (S. cerevisiae)	7	87505543	87538856	7q21.12	0.766478	9.47421e-13	1.72525e-08	EZH2	60965607	0	1		OV:NCI_ADR_RES 7:87402290-87981932	FALSE	FALSE
	SLC25A40	55972	solute carrier family 25, member 40	7	87463813	87505692	7q21.12	0.606227	2.84806e-07	0.00461699	EZH2	60998771	0	1		OV:NCI_ADR_RES 7:87402290-87981932	FALSE	FALSE
	STEAP4	79689	STEAP family member 4	7	87905743	87936228	7q21.12	0.106706	0.417093	1	EZH2	60568235	0	1		OV:NCI_ADR_RES 7:87402290-87981932	FALSE	FALSE
	SRI	6717	sorcin	7	87834431	87856308	7q21.12	0.568169	2.18925e-06	0.0339553	EZH2	60648155	0	1		OV:NCI_ADR_RES 7:87402290-87981932	FALSE	FALSE
	SAMD9	54809	sterile alpha motif domain containing 9	7	92728825	92747336	7q21.2	0.13106	0.31821	1	EZH2	55757127	0	1		LC:NCI_H460 7:92614766-95002898	FALSE	FALSE
	SAMD9L	219285	sterile alpha motif domain containing 9-like	7	92759367	92777680	7q21.2	0.205258	0.115653	1	EZH2	55726783	0	1		LC:NCI_H460 7:92614766-95002898	FALSE	FALSE
	HEPACAM2	253012	HEPACAM family member 2	7	92817898	92855782	7q21.3	0.0925042	0.482074	1	EZH2	55648681	0	1		LC:NCI_H460 7:92614766-95002898	FALSE	FALSE
	GNGT1	2792	guanine nucleotide binding protein (G protein), gamma transducing activity polypeptide 1	7	93535819	93540485	7q21.3	0.179655	0.169586	1	EZH2	54963978	0	1		LC:NCI_H460 7:92614766-95002898	FALSE	FALSE
	GNG11	2791	guanine nucleotide binding protein (G protein), gamma 11	7	93551015	93555826	7q21.3	-0.122701	0.354539	1	EZH2	54948637	0	1		LC:NCI_H460 7:92614766-95002898	FALSE	FALSE
	TFPI2	7980	tissue factor pathway inhibitor 2	7	93514708	93520303	7q21.3	0.0502281	0.703113	1	EZH2	54984160	0	1		LC:NCI_H460 7:92614766-95002898	FALSE	FALSE
	BET1	10282	blocked early in transport 1 homolog (S. cerevisiae)	7	93620999	93633690	7q21.3	0.718005	1.06754e-10	1.90108e-06	EZH2	54870773	0	1		LC:NCI_H460 7:92614766-95002898	FALSE	FALSE
	PEG10	23089	paternally expressed 10	7	94285636	94299006	7q21.3	0.112083	0.393869	1	EZH2	54205457	0	1		LC:NCI_H460 7:92614766-95002898	FALSE	FALSE
	PON1	5444	paraoxonase 1	7	94927668	94953884	7q21.3	0.0522983	0.691477	1	EZH2	53550579	0	1		LC:NCI_H460 7:92614766-95002898	FALSE	FALSE
	PON3	5446	paraoxonase 3	7	94989183	95025687	7q21.3	-0.0373837	0.776732	1	EZH2	53478776	0	1		LC:NCI_H460 7:92614766-95002898	FALSE	FALSE
	CYP3A5	1577	cytochrome P450, family 3, subfamily A, polypeptide 5	7	99245812	99277621	7q22.1	0.0941706	0.478051	1	EZH2	49226842	0	1		LC:NCI_H322M 7:99272370-101526886	FALSE	FALSE
	CYP3A43	64816	cytochrome P450, family 3, subfamily A, polypeptide 43	7	99425635	99464173	7q22.1	-0.0468752	0.722102	1	EZH2	49040290	0	1		LC:NCI_H322M 7:99272370-101526886	FALSE	FALSE
	TRIM4	89122	tripartite motif containing 4	7	99488029	99517223	7q22.1	0.598736	4.34507e-07	0.00698123	EZH2	48987240	0	1		LC:NCI_H322M 7:99272370-101526886	FALSE	FALSE
	AZGP1P1	646282	alpha-2-glycoprotein 1, zinc-binding pseudogene 1	7	99578384	99581860	7q22.1	-0.0718953	0.585141	1	EZH2	48922603	0	1		LC:NCI_H322M 7:99272370-101526886	FALSE	FALSE
	AZGP1	563	alpha-2-glycoprotein 1, zinc-binding	7	99564349	99573735	7q22.1	0.0412757	0.754183	1	EZH2	48930728	0	1		LC:NCI_H322M 7:99272370-101526886	FALSE	FALSE
	GJC3	349149	gap junction protein, gamma 3, 30.2kDa	7	99520891	99527243	7q22.1	0.064761	0.623001	1	EZH2	48977220	0	1		LC:NCI_H322M 7:99272370-101526886	FALSE	FALSE
	MCM7	4176	minichromosome maintenance complex component 7	7	99690403	99699427	7q22.1	0.618564	1.3866e-07	0.00227638	EZH2	48805036	0	1		LC:NCI_H322M 7:99272370-101526886	FALSE	FALSE
	TAF6	6878	TAF6 RNA polymerase II, TATA box binding protein (TBP)-associated factor, 80kDa	7	99704692	99717481	7q22.1	0.714861	1.402e-10	2.49122e-06	EZH2	48786982	0	1		LC:NCI_H322M 7:99272370-101526886	FALSE	FALSE
	ZNF3	7551	zinc finger protein 3	7	99661652	99679371	7q22.1	0.699695	4.96878e-10	8.74256e-06	EZH2	48825092	0	1		LC:NCI_H322M 7:99272370-101526886	FALSE	FALSE
	ZSCAN21	7589	zinc finger and SCAN domain containing 21	7	99647416	99662663	7q22.1	0.591847	6.34736e-07	0.0101151	EZH2	48841800	0	1		LC:NCI_H322M 7:99272370-101526886	FALSE	FALSE
	AP4M1	9179	adaptor-related protein complex 4, mu 1 subunit	7	99699129	99704803	7q22.1	0.569667	2.03009e-06	0.0315416	EZH2	48799660	0	1		LC:NCI_H322M 7:99272370-101526886	FALSE	FALSE
	COPS6	10980	COP9 constitutive photomorphogenic homolog subunit 6 (Arabidopsis)	7	99686582	99689822	7q22.1	0.670941	4.46723e-09	7.70062e-05	EZH2	48814641	0	1		LC:NCI_H322M 7:99272370-101526886	FALSE	FALSE
	CNPY4	245812	canopy 4 homolog (zebrafish)	7	99717264	99723128	7q22.1	0.53717	9.63944e-06	0.143743	EZH2	48781335	0	1		LC:NCI_H322M 7:99272370-101526886	FALSE	FALSE
	MBLAC1	255374	metallo-beta-lactamase domain containing 1	7	99724319	99726121	7q22.1	0.669655	4.90053e-09	8.43969e-05	EZH2	48778342	0	1		LC:NCI_H322M 7:99272370-101526886	FALSE	FALSE
	C7orf43	55262	chromosome 7 open reading frame 43	7	99752042	99756302	7q22.1	0.72375	6.42565e-11	1.14781e-06	EZH2	48748161	0	1		LC:NCI_H322M 7:99272370-101526886	FALSE	FALSE
	STAG3	10734	stromal antigen 3	7	99775537	99812010	7q22.1	-0.0801618	0.542624	1	EZH2	48692453	0	1		LC:NCI_H322M 7:99272370-101526886	FALSE	FALSE
	PVRIG	79037	poliovirus receptor related immunoglobulin domain containing	7	99816870	99819111	7q22.1	0.0775206	0.556044	1	EZH2	48685352	0	1		LC:NCI_H322M 7:99272370-101526886	FALSE	FALSE
	GAL3ST4	79690	galactose-3-O-sulfotransferase 4	7	99756864	99766373	7q22.1	0.335521	0.00877471	1	EZH2	48738090	0	1		LC:NCI_H322M 7:99272370-101526886	FALSE	FALSE
	GATS	352954	GATS, stromal antigen 3 opposite strand	7	99798277	99869855	7q22.1	0.373064	0.00332754	1	EZH2	48634608	0	1		LC:NCI_H322M 7:99272370-101526886	FALSE	FALSE
	GPC2	221914	glypican 2	7	99767228	99774990	7q22.1	0.134524	0.305475	1	EZH2	48729473	0	1		LC:NCI_H322M 7:99272370-101526886	FALSE	FALSE
	PILRA	29992	paired immunoglobin-like type 2 receptor alpha	7	99971067	99997722	7q22.1	0.38159	0.00262689	1	EZH2	48506741	0	1		LC:NCI_H322M 7:99272370-101526886	FALSE	FALSE
	PMS2P1	5379	postmeiotic segregation increased 2 pseudogene 1	7	99918262	99933930	7q22.1	0.632258	6.00925e-08	0.00100018	EZH2	48570533	0	1		LC:NCI_H322M 7:99272370-101526886	FALSE	FALSE
	PILRB	29990	paired immunoglobin-like type 2 receptor beta	7	99933687	99965454	7q22.1	0.434825	0.00051711	1	EZH2	48539009	0	1		LC:NCI_H322M 7:99272370-101526886	FALSE	FALSE
	SPDYE3	441272	speedy homolog E3 (Xenopus laevis)	7	99905324	99919819	7q22.1	0.301513	0.0192244	1	EZH2	48584644	0	1		LC:NCI_H322M 7:99272370-101526886	FALSE	FALSE
	MEPCE	56257	methylphosphate capping enzyme	7	100026412	100031749	7q22.1	0.721958	7.53813e-11	1.3451e-06	EZH2	48472714	0	1		LC:NCI_H322M 7:99272370-101526886	FALSE	FALSE
	TSC22D4	81628	TSC22 domain family, member 4	7	100064141	100076902	7q22.1	0.72481	5.84337e-11	1.04439e-06	EZH2	48427561	0	1		LC:NCI_H322M 7:99272370-101526886	FALSE	FALSE
	C7orf61	402573	chromosome 7 open reading frame 61	7	100054237	100061894	7q22.1	0.341229	0.00817276	1	EZH2	48442569	0	1		LC:NCI_H322M 7:99272370-101526886	FALSE	FALSE
	FBXO24	26261	F-box protein 24	7	100183955	100198740	7q22.1	-0.0917031	0.489709	1	EZH2	48305723	0	1		LC:NCI_H322M 7:99272370-101526886	FALSE	FALSE
	PCOLCE	5118	procollagen C-endopeptidase enhancer	7	100199881	100205798	7q22.1	0.273236	0.0346578	1	EZH2	48298665	0	1		LC:NCI_H322M 7:99272370-101526886	FALSE	FALSE
	MOSPD3	64598	motile sperm domain containing 3	7	100209724	100213000	7q22.1	0.663513	7.57837e-09	0.000129787	EZH2	48291463	0	1		LC:NCI_H322M 7:99272370-101526886	FALSE	FALSE
	TFR2	7036	transferrin receptor 2	7	100218038	100239173	7q22.1	0.20156	0.122509	1	EZH2	48265290	0	1		LC:NCI_H322M 7:99272370-101526886	FALSE	FALSE
	ACTL6B	51412	actin-like 6B	7	100240725	100254084	7q22.1	-0.0569979	0.668076	1	EZH2	48250379	0	1		LC:NCI_H322M 7:99272370-101526886	FALSE	FALSE
	LRCH4	4034	leucine-rich repeats and calponin homology (CH) domain containing 4	7	100171633	100183776	7q22.1	0.57216	1.78896e-06	0.0278792	EZH2	48320687	0	1		LC:NCI_H322M 7:99272370-101526886	FALSE	FALSE
	GNB2	2783	guanine nucleotide binding protein (G protein), beta polypeptide 2	7	100271362	100276792	7q22.1	0.729362	3.86567e-11	6.93037e-07	EZH2	48227671	0	1		LC:NCI_H322M 7:99272370-101526886	FALSE	FALSE
	POP7	10248	processing of precursor 7, ribonuclease P/MRP subunit (S. cerevisiae)	7	100303675	100305123	7q22.1	0.769942	6.4738e-13	1.1803e-08	EZH2	48199340	0	1		LC:NCI_H322M 7:99272370-101526886	FALSE	FALSE
	GIGYF1	64599	GRB10 interacting GYF protein 1	7	100277129	100286870	7q22.1	0.630002	6.91589e-08	0.00114845	EZH2	48217593	0	1		LC:NCI_H322M 7:99272370-101526886	FALSE	FALSE
	ZAN	7455	zonadhesin	7	100331248	100395419	7q22.1	-0.236694	0.071086	1	EZH2	48109044	0	1		LC:NCI_H322M 7:99272370-101526886	FALSE	FALSE
	SRRT	51593	serrate RNA effector molecule homolog (Arabidopsis)	7	100472700	100486285	7q22.1	0.444785	0.00037003	1	EZH2	48018178	0	1		LC:NCI_H322M 7:99272370-101526886	FALSE	FALSE
	SLC12A9	56996	solute carrier family 12 (potassium/chloride transporters), member 9	7	100450340	100464634	7q22.1	0.752128	4.29219e-12	7.77444e-08	EZH2	48039829	0	1		LC:NCI_H322M 7:99272370-101526886	FALSE	FALSE
	ACHE	43	acetylcholinesterase	7	100487614	100493541	7q22.1	0.0280307	0.833088	1	EZH2	48010922	0	1		LC:NCI_H322M 7:99272370-101526886	FALSE	FALSE
	UFSP1	402682	UFM1-specific peptidase 1 (non-functional)	7	100486343	100487339	7q22.1	0.498367	5.89727e-05	0.83063	EZH2	48017124	0	1		LC:NCI_H322M 7:99272370-101526886	FALSE	FALSE
	TRIP6	7205	thyroid hormone receptor interactor 6	7	100464949	100471076	7q22.1	0.273109	0.0347456	1	EZH2	48033387	0	1		LC:NCI_H322M 7:99272370-101526886	FALSE	FALSE
	MUC12	10071	mucin 12, cell surface associated	7	100612903	100662230	7q22.1	0.0709391	0.590154	1	EZH2	47842233	0	1		LC:NCI_H322M 7:99272370-101526886	FALSE	FALSE
	MUC17	140453	mucin 17, cell surface associated	7	100663363	100702140	7q22.1	0.0714589	0.587427	1	EZH2	47802323	0	1		LC:NCI_H322M 7:99272370-101526886	FALSE	FALSE
	SERPINE1	5054	serpin peptidase inhibitor, clade E (nexin, plasminogen activator inhibitor type 1), member 1	7	100770369	100782547	7q22.1	-0.0331401	0.801527	1	EZH2	47721916	0	1		LC:NCI_H322M 7:99272370-101526886	FALSE	FALSE
	TRIM56	81844	tripartite motif containing 56	7	100728785	100733889	7q22.1	0.662217	8.29797e-09	0.000142003	EZH2	47770574	0	1		LC:NCI_H322M 7:99272370-101526886	FALSE	FALSE
	CLDN15	24146	claudin 15	7	100875372	100882101	7q22.1	0.286011	0.0267375	1	EZH2	47622362	0	1		LC:NCI_H322M 7:99272370-101526886	FALSE	FALSE
	PLOD3	8985	procollagen-lysine, 2-oxoglutarate 5-dioxygenase 3	7	100849257	100861011	7q22.1	0.564669	2.6077e-06	0.0402655	EZH2	47643452	0	1		LC:NCI_H322M 7:99272370-101526886	FALSE	FALSE
	ZNHIT1	10467	zinc finger, HIT-type containing 1	7	100860984	100867471	7q22.1	0.768131	7.9064e-13	1.44023e-08	EZH2	47636992	0	1		LC:NCI_H322M 7:99272370-101526886	FALSE	FALSE
	MOGAT3	346606	monoacylglycerol O-acyltransferase 3	7	100839012	100844302	7q22.1	0.0213556	0.872453	1	EZH2	47660161	0	1		LC:NCI_H322M 7:99272370-101526886	FALSE	FALSE
	VGF	7425	VGF nerve growth factor inducible	7	100805789	100808852	7q22.1	0.272576	0.0351154	1	EZH2	47695611	0	1		LC:NCI_H322M 7:99272370-101526886	FALSE	FALSE
	AP1S1	1174	adaptor-related protein complex 1, sigma 1 subunit	7	100797685	100804557	7q22.1	0.688145	1.23729e-09	2.16055e-05	EZH2	47699906	0	1		LC:NCI_H322M 7:99272370-101526886	FALSE	FALSE
	FIS1	51024	fission 1 (mitochondrial outer membrane) homolog (S. cerevisiae)	7	100882892	100888371	7q22.1	0.756104	4.39699e-12	7.96339e-08	EZH2	47616092	0	1		LC:NCI_H322M 7:99272370-101526886	FALSE	FALSE
	RABL5	64792	RAB, member RAS oncogene family-like 5	7	100956647	100965093	7q22.1	0.348844	0.00630122	1	EZH2	47539370	0	1		LC:NCI_H322M 7:99272370-101526886	FALSE	FALSE
	MYL10	93408	myosin, light chain 10, regulatory	7	101256604	101272576	7q22.1	-0.0822666	0.539263	1	EZH2	47231887	0	1		LC:NCI_H322M 7:99272370-101526886	FALSE	FALSE
	MDFIC	29969	MyoD family inhibitor domain containing	7	114562208	114659970	7q31.1:7q31.2	0.40419	0.00136081	1	EZH2	33844493	0	1		LC:NCI_H522 7:114172474-117438553	FALSE	FALSE
	CAV1	857	caveolin 1, caveolae protein, 22kDa	7	116164838	116201239	7q31.2	0.112506	0.396225	1	EZH2	32303224	0	1		LC:NCI_H522 7:114172474-117438553	FALSE	FALSE
	CAV2	858	caveolin 2	7	116139654	116148595	7q31.2	0.10169	0.439449	1	EZH2	32355868	0	1		LC:NCI_H522 7:114172474-117438553	FALSE	FALSE
	PDGFRA	5156	platelet-derived growth factor receptor, alpha polypeptide	4	55095263	55164412	4q12	0.394406	0.0018193	1	PHOX2B	13344276	1	0	CNS:SNB_19 4:54439814-55364789		FALSE	FALSE
	C7orf49	78996	chromosome 7 open reading frame 49	7	134850531	134855578	7q33	0.698496	5.47343e-10	9.62009e-06	EZH2	13648885	0	1		LC:NCI_H226 7:134226900-135244069	FALSE	FALSE
	TMEM140	55281	transmembrane protein 140	7	134832765	134850967	7q33	0.52982	1.34127e-05	0.197958	EZH2	13653496	0	1		LC:NCI_H226 7:134226900-135244069	FALSE	FALSE
	STRA8	346673	stimulated by retinoic acid gene 8 homolog (mouse)	7	134916730	134943244	7q33	0.00697428	0.95819	1	EZH2	13561219	0	1		LC:NCI_H226 7:134226900-135244069	FALSE	FALSE
	MGAM	8972	maltase-glucoamylase (alpha-glucosidase)	7	141695678	141806547	7q34	-0.00489702	0.970378	1	EZH2	6697916	0	1		ME:SK_MEL_2 7:141769602-141791715	FALSE	FALSE
	PIM1	5292	pim-1 oncogene	6	37137921	37143204	6p21.2	0.264907	0.0425977	1	E2F3	16643976	1	0	BR:MDA_MB_231 6:34885792-38438550		FALSE	FALSE
	VPS13B	157680	vacuolar protein sorting 13 homolog B (yeast)	8	100025493	100889814	8q22.2	0.739037	1.5617e-11	2.81075e-07	NKX3-1	76485043	0	1		PR:PC_3 8:99211099-100383230	FALSE	FALSE
	TNKS	8658	tankyrase, TRF1-interacting ankyrin-related ADP-ribose polymerase	8	9413444	9639856	8p23.1	0.672149	4.09352e-09	7.06336e-05	TUSC3	5757739	0	1		ME:LOXIMVI 8:8814170-10251894	FALSE	FALSE
	NRG1	3084	neuregulin 1	8	31497267	32622558	8p12	0.290958	0.0241096	1	NKX3-1	7956817	0	1		LC:HOP_92 8:32606953-33312582	FALSE	FALSE
	STK3	6788	serine/threonine kinase 3	8	99466858	99954799	8q22.2	0.708713	2.36421e-10	4.18323e-06	NKX3-1	75926408	0	1		PR:PC_3 8:99211099-100383230	FALSE	FALSE
	ENPP2	5168	ectonucleotide pyrophosphatase/phosphodiesterase 2	8	120569316	120651106	8q24.12	-0.117688	0.370493	1	NKX3-1	97028866	0	1		PR:PC_3 8:120154150-122370483	FALSE	FALSE
	SNTB1	6641	syntrophin, beta 1 (dystrophin-associated protein A1, 59kDa, basic component 1)	8	121547984	121824309	8q24.12	0.126591	0.335132	1	NKX3-1	98007534	0	1		PR:PC_3 8:120154150-122370483	FALSE	FALSE
	KCNQ3	3786	potassium voltage-gated channel, KQT-like subfamily, member 3	8	133133104	133493004	8q24.22	0.0547552	0.67776	1	NKX3-1	109592654	0	1		PR:PC_3 8:131888562-133861901	FALSE	FALSE
	FAM135B	51059	family with sequence similarity 135, member B	8	139142265	139509065	8q24.23	-0.135737	0.301095	1	NKX3-1	115601815	0	1		PR:PC_3 8:138374914-139245553	FALSE	FALSE
	LRRC24	441381	leucine rich repeat containing 24	8	145747760	145752416	8q24.3	0.358218	0.00534045	1	NKX3-1	122207310	0	1		LC:NCI_H23 8:145735997-145940766	FALSE	FALSE
	C8orf82	414919	chromosome 8 open reading frame 82	8	145751602	145754458	8q24.3	0.268214	0.039984	1	NKX3-1	122211152	0	1		LC:NCI_H23 8:145735997-145940766	FALSE	FALSE
	MSRA	4482	methionine sulfoxide reductase A	8	9911829	10286401	8p23.1	0.26888	0.0377694	1	TUSC3	5111194	0	1		ME:LOXIMVI 8:8814170-10251894	FALSE	FALSE
	FUT10	84750	fucosyltransferase 10 (alpha (1,3) fucosyltransferase)	8	33228343	33330664	8p12	0.599065	4.26611e-07	0.00685778	NKX3-1	9687893	0	1		LC:HOP_92 8:32606953-33312582	FALSE	FALSE
	ZMAT4	79698	zinc finger, matrin-type 4	8	40388110	40755343	8p11.21	0.178346	0.172768	1	NKX3-1	16847660	0	1		ME:SK_MEL_5 8:40159667-41183591	FALSE	FALSE
	SFRP1	6422	secreted frizzled-related protein 1	8	41119475	41166990	8p11.21	0.0382083	0.771938	1	NKX3-1	17579025	0	1		ME:SK_MEL_5 8:40159667-41183591	FALSE	FALSE
	ZNF704	619279	zinc finger protein 704	8	81540685	81787016	8q21.13	0.168595	0.19785	1	NKX3-1	58000235	0	1		RE:SN12C 8:81576907-81708514	FALSE	FALSE
	NIPAL2	79815	NIPA-like domain containing 2	8	99204386	99306621	8q22.2	0.34204	0.00747523	1	NKX3-1	75663936	0	1		PR:PC_3 8:99211099-100383230	FALSE	FALSE
	TRPS1	7227	trichorhinophalangeal syndrome I	8	116420723	116681228	8q23.3	0.375742	0.00309143	1	NKX3-1	92880273	0	1		LC:EKVX 8:116333257-117685225	FALSE	FALSE
	EIF3H	8667	eukaryotic translation initiation factor 3, subunit H	8	117657054	117768062	8q23.3:8q24.11	0.823573	6.55342e-16	1.20806e-11	NKX3-1	94116604	0	1		LC:EKVX 8:116333257-117685225	FALSE	FALSE
	DSCC1	79075	defective in sister chromatid cohesion 1 homolog (S. cerevisiae)	8	120846180	120868170	8q24.12	0.352917	0.00567865	1	NKX3-1	97305730	0	1		PR:PC_3 8:120154150-122370483	FALSE	FALSE
	DEPTOR	64798	DEP domain containing MTOR-interacting protein	8	120885899	121063157	8q24.12	-0.0528726	0.688262	1	NKX3-1	97345449	0	1		PR:PC_3 8:120154150-122370483	FALSE	FALSE
	MTBP	27085	Mdm2, transformed 3T3 cell double minute 2, p53 binding protein (mouse) binding protein, 104kDa	8	121457637	121535875	8q24.12	0.59776	5.76881e-07	0.00921336	NKX3-1	97917187	0	1		PR:PC_3 8:120154150-122370483	FALSE	FALSE
	COL14A1	7373	collagen, type XIV, alpha 1	8	121137346	121384273	8q24.12	-0.0195951	0.881866	1	NKX3-1	97596896	0	1		PR:PC_3 8:120154150-122370483	FALSE	FALSE
	ZHX2	22882	zinc fingers and homeoboxes 2	8	123793900	123986755	8q24.13	0.256654	0.0477593	1	NKX3-1	100253450	0	1		PR:PC_3 8:122966072-124925106	FALSE	FALSE
	WDR67	93594	WD repeat domain 67	8	124084919	124164392	8q24.13	0.6115	2.10177e-07	0.00342631	NKX3-1	100544469	0	1		PR:PC_3 8:122966072-124925106	FALSE	FALSE
	ATAD2	29028	ATPase family, AAA domain containing 2	8	124332090	124408705	8q24.13	0.74271	1.09558e-11	1.97609e-07	NKX3-1	100791640	0	1		PR:PC_3 8:122966072-124925106	FALSE	FALSE
	FBXO32	114907	F-box protein 32	8	124510126	124553493	8q24.13	0.114847	0.386407	1	NKX3-1	100969676	0	1		PR:PC_3 8:122966072-124925106	FALSE	FALSE
	ADCY8	114	adenylate cyclase 8 (brain)	8	131792546	132052835	8q24.22	0.112125	0.397837	1	NKX3-1	108252096	0	1		PR:PC_3 8:131888562-133861901	FALSE	FALSE
	OC90	729330	otoconin 90	8	133036466	133071627	8q24.22	0.191623	0.145973	1	NKX3-1	109496016	0	1		PR:PC_3 8:131888562-133861901	FALSE	FALSE
	SLA	6503	Src-like-adaptor	8	134048972	134115310	8q24.22	-0.138229	0.292223	1	NKX3-1	110508522	0	1		PR:PC_3 8:133908217-134672426	FALSE	FALSE
	PHF20L1	51105	PHD finger protein 20-like 1	8	133787603	133861052	8q24.22	0.76641	9.54475e-13	1.738e-08	NKX3-1	110247153	0	1		PR:PC_3 8:131888562-133861901	FALSE	FALSE
	TG	7038	thyroglobulin	8	133879204	134147143	8q24.22	0.288131	0.0268988	1	NKX3-1	110338754	0	1		PR:PC_3 8:133908217-134672426	FALSE	FALSE
	ST3GAL1	6482	ST3 beta-galactoside alpha-2,3-sialyltransferase 1	8	134467090	134584183	8q24.22	0.403682	0.0013818	1	NKX3-1	110926640	0	1		PR:PC_3 8:133908217-134672426	FALSE	FALSE
	ZFAT	57623	zinc finger and AT hook domain containing	8	135490030	135725292	8q24.22	0.596766	4.84682e-07	0.00776606	NKX3-1	111949580	0	1		PR:PC_3 8:134834620-137582579	FALSE	FALSE
	KHDRBS3	10656	KH domain containing, RNA binding, signal transduction associated 3	8	136469715	136659848	8q24.23	0.0140345	0.915242	1	NKX3-1	112929265	0	1		PR:PC_3 8:134834620-137582579	FALSE	FALSE
	COL22A1	169044	collagen, type XXII, alpha 1	8	139600477	139926236	8q24.23:8q24.3	0.0571441	0.667274	1	NKX3-1	116060027	0	1		PR:PC_3 8:139552905-140155427	FALSE	FALSE
	ERI1	90459	exoribonuclease 1	8	8860313	8890849	8p23.1	0.604734	3.10091e-07	0.00501573	TUSC3	6506746	0	1		ME:LOXIMVI 8:8814170-10251894	FALSE	FALSE
	PPP1R3B	79660	protein phosphatase 1, regulatory (inhibitor) subunit 3B	8	8993763	9009152	8p23.1	0.193117	0.13931	1	TUSC3	6388443	0	1		ME:LOXIMVI 8:8814170-10251894	FALSE	FALSE
	KCNS2	3788	potassium voltage-gated channel, delayed-rectifier, subfamily S, member 2	8	99439249	99443023	8q22.2	0.218505	0.0963895	1	NKX3-1	75898799	0	1		PR:PC_3 8:99211099-100383230	FALSE	FALSE
	OSR2	116039	odd-skipped related 2 (Drosophila)	8	99956630	99964326	8q22.2	0.335924	0.00868907	1	NKX3-1	76416180	0	1		PR:PC_3 8:99211099-100383230	FALSE	FALSE
	MAL2	114569	mal, T-cell differentiation protein 2 (gene/pseudogene)	8	120220609	120257914	8q24.12	0.137693	0.294115	1	NKX3-1	96680159	0	1		PR:PC_3 8:120154150-122370483	FALSE	FALSE
	NOV	4856	nephroblastoma overexpressed gene	8	120428551	120436678	8q24.12	-0.00177834	0.989241	1	NKX3-1	96888101	0	1		PR:PC_3 8:120154150-122370483	FALSE	FALSE
	TAF2	6873	TAF2 RNA polymerase II, TATA box binding protein (TBP)-associated factor, 150kDa	8	120743013	120845074	8q24.12	0.780773	1.88324e-13	3.44671e-09	NKX3-1	97202563	0	1		PR:PC_3 8:120154150-122370483	FALSE	FALSE
	MRPL13	28998	mitochondrial ribosomal protein L13	8	121408082	121457647	8q24.12	0.671481	4.29643e-09	7.41047e-05	NKX3-1	97867632	0	1		PR:PC_3 8:120154150-122370483	FALSE	FALSE
	HAS2	3037	hyaluronan synthase 2	8	122625270	122653630	8q24.13	0.199987	0.125515	1	NKX3-1	99084820	0	1		PR:PC_3 8:122487650-122861243	FALSE	FALSE
	HAS2-AS1	594842	HAS2 antisense RNA 1 (non-protein coding)	8	122651585	122657564	8q24.13	0.207918	0.114061	1	NKX3-1	99111135	0	1		PR:PC_3 8:122487650-122861243	FALSE	FALSE
	DERL1	79139	Der1-like domain family, member 1	8	124025403	124054663	8q24.13	0.769115	7.09445e-13	1.29289e-08	NKX3-1	100484953	0	1		PR:PC_3 8:122966072-124925106	FALSE	FALSE
	FAM83A	84985	family with sequence similarity 83, member A	8	124194751	124222318	8q24.13	0.070478	0.592579	1	NKX3-1	100654301	0	1		PR:PC_3 8:122966072-124925106	FALSE	FALSE
	LOC100131726	100131726	HCC-related HCC-C11_v3	8	124213411	124214983	8q24.13	0.0873568	0.5106	1	NKX3-1	100672961	0	1		PR:PC_3 8:122966072-124925106	FALSE	FALSE
	C8orf76	84933	chromosome 8 open reading frame 76	8	124232195	124253638	8q24.13	0.822516	1.36034e-15	2.50616e-11	NKX3-1	100691745	0	1		PR:PC_3 8:122966072-124925106	FALSE	FALSE
	ZHX1	11244	zinc fingers and homeoboxes 1	8	124260689	124287781	8q24.13	0.344986	0.00694531	1	NKX3-1	100720239	0	1		PR:PC_3 8:122966072-124925106	FALSE	FALSE
	WDYHV1	55093	WDYHV motif containing 1	8	124428964	124454260	8q24.13	0.728414	4.21599e-11	7.55379e-07	NKX3-1	100888514	0	1		PR:PC_3 8:122966072-124925106	FALSE	FALSE
	ANXA13	312	annexin A13	8	124693033	124749647	8q24.13	-0.127751	0.330687	1	NKX3-1	101152583	0	1		PR:PC_3 8:122966072-124925106	FALSE	FALSE
	KLHL38	340359	kelch-like 38 (Drosophila)	8	124657914	124665190	8q24.13	-0.135714	0.305418	1	NKX3-1	101117464	0	1		PR:PC_3 8:122966072-124925106	FALSE	FALSE
	FAM91A1	157769	family with sequence similarity 91, member A1	8	124780881	124827690	8q24.13	0.702825	3.85165e-10	6.79007e-06	NKX3-1	101240431	0	1		PR:PC_3 8:122966072-124925106	FALSE	FALSE
	TMEM65	157378	transmembrane protein 65	8	125323158	125384940	8q24.13	0.595604	5.16774e-07	0.00827407	NKX3-1	101782708	0	1		PR:PC_3 8:125140523-127273426	FALSE	FALSE
	TRIB1	10221	tribbles homolog 1 (Drosophila)	8	126442562	126450644	8q24.13	0.377772	0.00292247	1	NKX3-1	102902112	1	1	LE:HL_60 8:126242481-126546383	PR:PC_3 8:125140523-127273426	FALSE	FALSE
	FAM84B	157638	family with sequence similarity 84, member B	8	127564682	127570711	8q24.21	0.0372938	0.779149	1	NKX3-1	104024232	0	1		LE:HL_60 8:127387716-128067443	FALSE	FALSE
	EFR3A	23167	EFR3 homolog A (S. cerevisiae)	8	132916355	133025886	8q24.22	0.801737	1.39776e-14	2.56671e-10	NKX3-1	109375905	0	1		PR:PC_3 8:131888562-133861901	FALSE	FALSE
	HHLA1	10086	HERV-H LTR-associating 1	8	133073732	133117512	8q24.22	-0.0436126	0.742924	1	NKX3-1	109533282	0	1		PR:PC_3 8:131888562-133861901	FALSE	FALSE
	LRRC6	23639	leucine rich repeat containing 6	8	133584200	133687863	8q24.22	0.363132	0.00434889	1	NKX3-1	110043750	0	1		PR:PC_3 8:131888562-133861901	FALSE	FALSE
	HPYR1	93668	Helicobacter pylori responsive 1 (non-protein coding)	8	133572744	133573726	8q24.22	0.160598	0.224333	1	NKX3-1	110032294	0	1		PR:PC_3 8:131888562-133861901	FALSE	FALSE
	TMEM71	137835	transmembrane protein 71	8	133722191	133772914	8q24.22	-0.156751	0.231673	1	NKX3-1	110181741	0	1		PR:PC_3 8:131888562-133861901	FALSE	FALSE
	NDRG1	10397	N-myc downstream regulated 1	8	134249413	134309547	8q24.22	0.128686	0.327132	1	NKX3-1	110708963	0	1		PR:PC_3 8:133908217-134672426	FALSE	FALSE
	ZFAT-AS1	594840	ZFAT antisense RNA 1 (non-protein coding)	8	135610313	135612932	8q24.22	0.0190363	0.886207	1	NKX3-1	112069863	0	1		PR:PC_3 8:134834620-137582579	FALSE	FALSE
	LOC286094	286094	hypothetical LOC286094	8	136246373	136311962	8q24.22	-0.0625196	0.638064	1	NKX3-1	112705923	0	1		PR:PC_3 8:134834620-137582579	FALSE	FALSE
	MFSD3	113655	major facilitator superfamily domain containing 3	8	145734551	145736589	8q24.3	0.377087	0.00323997	1	NKX3-1	122194101	0	1		LC:NCI_H23 8:145735997-145940766	FALSE	FALSE
	RECQL4	9401	RecQ protein-like 4	8	145736666	145743210	8q24.3	0.629389	7.18365e-08	0.00119198	NKX3-1	122196216	0	1		LC:NCI_H23 8:145735997-145940766	FALSE	FALSE
	LRRC14	9684	leucine rich repeat containing 14	8	145743348	145750559	8q24.3	0.657974	1.11324e-08	0.00019003	NKX3-1	122202898	0	1		LC:NCI_H23 8:145735997-145940766	FALSE	FALSE
	ARHGAP39	80728	Rho GTPase activating protein 39	8	145754562	145838888	8q24.3	0.548781	5.62924e-06	0.0853843	NKX3-1	122214112	0	1		LC:NCI_H23 8:145735997-145940766	FALSE	FALSE
	BNC2	54796	basonuclin 2	9	16409500	16870786	9p22.3:9p22.2	0.28242	0.0287926	1	CDKN2A	5096964	0	1		BR:MDA_MB_231 9:16428179-18021844	FALSE	FALSE
	ZNF483	158399	zinc finger protein 483	9	114287446	114340124	9q31.3	0.12017	0.360415	1	PTCH1	16008199	0	1		RE:SN12C 9:112702878-115655707	FALSE	FALSE
	SVEP1	79987	sushi, von Willebrand factor type A, EGF and pentraxin domain containing 1	9	113127528	113342160	9q31.3	0.0601988	0.64774	1	PTCH1	14848281	0	1		RE:SN12C 9:112702878-115655707	FALSE	FALSE
	KIAA1958	158405	KIAA1958	9	115249247	115422706	9q32	0.275552	0.0330924	1	PTCH1	16970000	0	1		RE:SN12C 9:112702878-115655707	FALSE	FALSE
	UHRF2	115426	ubiquitin-like with PHD and ring finger domains 2	9	6413150	6507051	9p24.1	0.496376	5.49408e-05	0.775929	CDKN2A	15460699	0	1		OV:OVCAR_8 9:6272484-6634920	FALSE	FALSE
	GLDC	2731	glycine dehydrogenase (decarboxylating)	9	6532463	6645692	9p24.1	0.177684	0.174394	1	CDKN2A	15322058	0	1		OV:OVCAR_8 9:6272484-6634920	FALSE	FALSE
	CNTLN	54875	centlein, centrosomal protein	9	17135037	17503917	9p22.2	0.446516	0.000348758	1	CDKN2A	4463833	0	1		BR:MDA_MB_231 9:16428179-18021844	FALSE	FALSE
	SH3GL2	6456	SH3-domain GRB2-like 2	9	17578952	17797122	9p22.2	0.0472093	0.720202	1	CDKN2A	4170628	0	1		BR:MDA_MB_231 9:16428179-18021844	FALSE	FALSE
	SEMA4D	10507	sema domain, immunoglobulin domain (Ig), transmembrane domain (TM) and short cytoplasmic domain, (semaphorin) 4D	9	91975705	92094611	9q22.2	0.176687	0.176865	1	WNK2	3852600	0	1		RE:SN12C 9:91056115-93737924	FALSE	FALSE
	S1PR3	1903	sphingosine-1-phosphate receptor 3	9	91606323	91620069	9q22.1	0.231469	0.07516	1	WNK2	4327142	0	1		RE:SN12C 9:91056115-93737924	FALSE	FALSE
	SHC3	53358	SHC (Src homology 2 domain containing) transforming protein 3	9	91620685	91793682	9q22.1	-0.0613965	0.641207	1	WNK2	4153529	0	1		RE:SN12C 9:91056115-93737924	FALSE	FALSE
	SYK	6850	spleen tyrosine kinase	9	93564011	93660842	9q22.2	-0.0499912	0.704449	1	WNK2	2286369	0	1		RE:SN12C 9:91056115-93737924	FALSE	FALSE
	WNK2	65268	WNK lysine deficient protein kinase 2	9	95947211	96082854	9q22.31	-0.133876	0.307831	1	WNK2	0	0	1		RE:SN12C 9:95838226-96060403	FALSE	FALSE
	PALM2-AKAP2	445815	PALM2-AKAP2 readthrough	9	112542576	112934791	9q31.3	-0.023	0.861525	1	PTCH1	14263329	0	1		RE:SN12C 9:112702878-115655707	FALSE	FALSE
	AKAP2	11217	A kinase (PRKA) anchor protein 2	9	112810877	112934791	9q31.3	-0.00267148	0.983838	1	PTCH1	14531630	0	1		RE:SN12C 9:112702878-115655707	FALSE	FALSE
	PALM2	114299	paralemmin 2	9	112403067	112713756	9q31.3	0.0534932	0.6874	1	PTCH1	14123820	0	1		RE:SN12C 9:112702878-115655707	FALSE	FALSE
	KIAA0368	23392	KIAA0368	9	114122972	114247025	9q31.3	0.45185	0.000290013	1	PTCH1	15843725	0	1		RE:SN12C 9:112702878-115655707	FALSE	FALSE
	MUSK	4593	muscle, skeletal, receptor tyrosine kinase	9	113431050	113563278	9q31.3	0.13727	0.295615	1	PTCH1	15151803	0	1		RE:SN12C 9:112702878-115655707	FALSE	FALSE
	LPAR1	1902	lysophosphatidic acid receptor 1	9	113636053	113800365	9q31.3	0.178837	0.171571	1	PTCH1	15356806	0	1		RE:SN12C 9:112702878-115655707	FALSE	FALSE
	HSDL2	84263	hydroxysteroid dehydrogenase like 2	9	115142188	115234685	9q32	0.597418	4.67506e-07	0.00749786	PTCH1	16862941	0	1		RE:SN12C 9:112702878-115655707	FALSE	FALSE
	UGCG	7357	UDP-glucose ceramide glucosyltransferase	9	114659205	114695433	9q31.3	0.211372	0.104972	1	PTCH1	16379958	0	1		RE:SN12C 9:112702878-115655707	FALSE	FALSE
	GNG10	2790	guanine nucleotide binding protein (G protein), gamma 10	9	114423850	114432526	9q31.3	0.254803	0.0514648	1	PTCH1	16144603	0	1		RE:SN12C 9:112702878-115655707	FALSE	FALSE
	SUSD1	64420	sushi domain containing 1	9	114803060	114937556	9q31.3:9q32	0.20567	0.11491	1	PTCH1	16523813	0	1		RE:SN12C 9:112702878-115655707	FALSE	FALSE
	DNAJC25-GNG10	552891	DNAJC25-GNG10 readthrough	9	114393631	114432526	9q31.3	-0.166469	0.207624	1	PTCH1	16114384	0	1		RE:SN12C 9:112702878-115655707	FALSE	FALSE
	SNX30	401548	sorting nexin family member 30	9	115513133	115637267	9q32	0.225207	0.0836207	1	PTCH1	17233886	0	1		RE:SN12C 9:112702878-115655707	FALSE	FALSE
	FNBP1	23048	formin binding protein 1	9	132649465	132805473	9q34.11	0.0528219	0.688545	1	TSC1	2961261	0	1		LE:K_562 9:132696092-133596328	FALSE	FALSE
	TRRAP	8295	transformation/transcription domain-associated protein	7	98476112	98610866	7q22.1	0.76959	6.73081e-13	1.22696e-08	EZH2	49893597	1	0	LC:NCI_H322M 7:98375832-98641364		FALSE	FALSE
	TPD52L3	89882	tumor protein D52-like 3	9	6328348	6331900	9p24.1	-0.144382	0.275265	1	CDKN2A	15635850	0	1		OV:OVCAR_8 9:6272484-6634920	FALSE	FALSE
	DMRTA1	63951	DMRT-like family A1	9	22446839	22452472	9p21.3	0.296075	0.0216241	1	CDKN2A	452349	4	1	CNS:SF_295 9:22081558-22855531,ME:SK_MEL_2 9:22396015-22543978,LC:NCI_H322M 9:22200167-24498048,RE:ACHN 9:22000187-24498048	ME:MALME_3M 9:21282489-22892510	FALSE	FALSE
	SPIN1	10927	spindlin 1	9	91003296	91093622	9q22.1	0.511449	2.9638e-05	0.426965	WNK2	4853589	0	1		RE:SN12C 9:91056115-93737924	FALSE	FALSE
	NXNL2	158046	nucleoredoxin-like 2	9	91150015	91190704	9q22.1	0.193159	0.139221	1	WNK2	4756507	0	1		RE:SN12C 9:91056115-93737924	FALSE	FALSE
	LOC286238	286238	hypothetical protein LOC286238	9	91262093	91267075	9q22.1	-0.0128377	0.923122	1	WNK2	4680136	0	1		RE:SN12C 9:91056115-93737924	FALSE	FALSE
	C9orf47	286223	chromosome 9 open reading frame 47	9	91605777	91611057	9q22.1	-0.135391	0.30658	1	WNK2	4336154	0	1		RE:SN12C 9:91056115-93737924	FALSE	FALSE
	SECISBP2	79048	SECIS binding protein 2	9	91933411	91974561	9q22.2	0.487688	7.74077e-05	1	WNK2	3972650	1	1	OV:NCI_ADR_RES 9:91778410-92070214	RE:SN12C 9:91056115-93737924	FALSE	FALSE
	CKS2	1164	CDC28 protein kinase regulatory subunit 2	9	91926112	91931618	9q22.2	0.595017	5.33746e-07	0.00854047	WNK2	4015593	1	1	OV:NCI_ADR_RES 9:91778410-92070214	RE:SN12C 9:91056115-93737924	FALSE	FALSE
	GADD45G	10912	growth arrest and DNA-damage-inducible, gamma	9	92219926	92221469	9q22.2	0.0814063	0.536356	1	WNK2	3725742	0	1		RE:SN12C 9:91056115-93737924	FALSE	FALSE
	DIRAS2	54769	DIRAS family, GTP-binding RAS-like 2	9	93372113	93405108	9q22.2	-0.264548	0.0410897	1	WNK2	2542103	0	1		RE:SN12C 9:91056115-93737924	FALSE	FALSE
	C9orf89	84270	chromosome 9 open reading frame 89	9	95858449	95875565	9q22.31	0.256793	0.0476344	1	WNK2	71646	0	1		RE:SN12C 9:95838226-96060403	FALSE	FALSE
	NINJ1	4814	ninjurin 1	9	95883770	95896570	9q22.31	0.186563	0.153499	1	WNK2	50641	0	1		RE:SN12C 9:95838226-96060403	FALSE	FALSE
	SUSD3	203328	sushi domain containing 3	9	95820988	95847415	9q22.31	-0.0941148	0.474446	1	WNK2	99796	0	1		RE:SN12C 9:95838226-96060403	FALSE	FALSE
	NR4A3	8013	nuclear receptor subfamily 4, group A, member 3	9	102584136	102629173	9q22.33:9q31.1	-0.0815721	0.535523	1	PTCH1	4304889	0	1		LE:SR 9:102580391-102727838	FALSE	FALSE
	STX17	55014	syntaxin 17	9	102668914	102736818	9q31.1	0.484834	8.64612e-05	1	PTCH1	4389667	0	1		LE:SR 9:102580391-102727838	FALSE	FALSE
	LOC441461	441461	hypothetical LOC441461	9	102648599	102668883	9q31.1	0.00023542	0.998576	1	PTCH1	4369352	0	1		LE:SR 9:102580391-102727838	FALSE	FALSE
	C9orf152	401546	chromosome 9 open reading frame 152	9	112961845	112970413	9q31.3	0.28377	0.0280049	1	PTCH1	14682598	0	1		RE:SN12C 9:112702878-115655707	FALSE	FALSE
	TXN	7295	thioredoxin	9	113006091	113018920	9q31.3	0.448187	0.000371213	1	PTCH1	14726844	0	1		RE:SN12C 9:112702878-115655707	FALSE	FALSE
	OR2K2	26248	olfactory receptor, family 2, subfamily K, member 2	9	114089762	114090713	9q31.3	-0.134696	0.309094	1	PTCH1	15810515	0	1		RE:SN12C 9:112702878-115655707	FALSE	FALSE
	PTGR1	22949	prostaglandin reductase 1	9	114312001	114362135	9q31.3	0.265901	0.0400281	1	PTCH1	16032754	0	1		RE:SN12C 9:112702878-115655707	FALSE	FALSE
	DNAJC25	548645	DnaJ (Hsp40) homolog, subfamily C , member 25	9	114393631	114416631	9q31.3	0.42256	0.000770126	1	PTCH1	16114384	0	1		RE:SN12C 9:112702878-115655707	FALSE	FALSE
	C9orf84	158401	chromosome 9 open reading frame 84	9	114448900	114545779	9q31.3	0.0979606	0.460437	1	PTCH1	16169653	0	1		RE:SN12C 9:112702878-115655707	FALSE	FALSE
	SLC46A2	57864	solute carrier family 46, member 2	9	115641199	115653193	9q32	-0.0890235	0.502536	1	PTCH1	17361952	0	1		RE:SN12C 9:112702878-115655707	FALSE	FALSE
	GPR107	57720	G protein-coupled receptor 107	9	132815984	132902448	9q34.11	0.420379	0.000825381	1	TSC1	2864286	0	1		LE:K_562 9:132696092-133596328	FALSE	FALSE
	NCS1	23413	neuronal calcium sensor 1	9	132934856	132999583	9q34.11	0.0995724	0.449084	1	TSC1	2767151	0	1		LE:K_562 9:132696092-133596328	FALSE	FALSE
	ASS1	445	argininosuccinate synthase 1	9	133320093	133376661	9q34.11	0.29736	0.0210354	1	TSC1	2390073	0	1		LE:K_562 9:132696092-133596328	FALSE	FALSE
	FUBP3	8939	far upstream element (FUSE) binding protein 3	9	133454959	133513739	9q34.11:9q34.12	0.431801	0.00063824	1	TSC1	2252995	0	1		LE:K_562 9:132696092-133596328	FALSE	FALSE
	PRDM12	59335	PR domain containing 12	9	133539980	133558384	9q34.12	0.161083	0.222917	1	TSC1	2208350	0	1		LE:K_562 9:132696092-133596328	FALSE	FALSE
	EXOSC2	23404	exosome component 2	9	133569157	133580452	9q34.12	0.380101	0.00273887	1	TSC1	2186282	0	1		LE:K_562 9:132696092-133596328	FALSE	FALSE
	GRIN1	2902	glutamate receptor, ionotropic, N-methyl D-aspartate 1	9	140033608	140063214	9q34.3	0.0783958	0.55506	1	NOTCH1	593370	0	1		RE:786_0 9:140039136-140092232	FALSE	FALSE
	TPRN	286262	taperin	9	140086068	140095163	9q34.3	0.375804	0.00308614	1	NOTCH1	645830	0	1		RE:786_0 9:140039136-140092232	FALSE	FALSE
	SSNA1	8636	Sjogren syndrome nuclear autoantigen 1	9	140083053	140084822	9q34.3	0.587266	8.1279e-07	0.0128884	NOTCH1	642815	0	1		RE:786_0 9:140039136-140092232	FALSE	FALSE
	ANAPC2	29882	anaphase promoting complex subunit 2	9	140069235	140083057	9q34.3	0.611086	2.74231e-07	0.00444886	NOTCH1	628997	0	1		RE:786_0 9:140039136-140092232	FALSE	FALSE
	LRRC26	389816	leucine rich repeat containing 26	9	140063211	140064491	9q34.3	0.356485	0.00517841	1	NOTCH1	622973	0	1		RE:786_0 9:140039136-140092232	FALSE	FALSE
	MID1	4281	midline 1 (Opitz/BBB syndrome)	X	10413349	10851809	Xp22.2	0.353263	0.00562842	1	BCOR	29058689	0	1		OV:OVCAR_8 X:10364594-10548106	FALSE	FALSE
	IL1RAPL1	11141	interleukin 1 receptor accessory protein-like 1	X	28605680	29974017	Xp21.3:Xp21.2	-0.132719	0.316314	1	BCOR	9936481	0	1		CO:HCT_116 X:29549115-29992262	FALSE	FALSE
	TRPC5	7224	transient receptor potential cation channel, subfamily C, member 5	X	111017541	111326004	Xq23	0.102257	0.440904	1	STAG2	11768470	0	1		CNS:SF_268 X:108650062-112721478	FALSE	FALSE
	ACSL4	2182	acyl-CoA synthetase long-chain family member 4	X	108884563	108976621	Xq23	0.0433901	0.742017	1	STAG2	14117853	0	1		CNS:SF_268 X:108650062-112721478	FALSE	FALSE
	GUCY2F	2986	guanylate cyclase 2F, retinal	X	108616134	108725285	Xq22.3:Xq23	0.0188529	0.887296	1	STAG2	14369189	0	1		CNS:SF_268 X:108650062-112721478	FALSE	FALSE
	AMMECR1	9949	Alport syndrome, mental retardation, midface hypoplasia and elliptocytosis chromosomal region gene 1	X	109437413	109683461	Xq23	0.434237	0.000527255	1	STAG2	13411013	1	1	OV:OVCAR_8 X:108906466-110653358	CNS:SF_268 X:108650062-112721478	FALSE	FALSE
	CHRDL1	91851	chordin-like 1	X	109917083	110039286	Xq23	0.0570765	0.664894	1	STAG2	13055188	1	1	OV:OVCAR_8 X:108906466-110653358	CNS:SF_268 X:108650062-112721478	FALSE	FALSE
	TMEM164	84187	transmembrane protein 164	X	109245862	109421016	Xq23	0.439454	0.000443178	1	STAG2	13673458	1	1	OV:OVCAR_8 X:108906466-110653358	CNS:SF_268 X:108650062-112721478	FALSE	FALSE
	CAPN6	827	calpain 6	X	110488326	110513774	Xq23	0.141072	0.282313	1	STAG2	12580700	1	1	OV:OVCAR_8 X:108906466-110653358	CNS:SF_268 X:108650062-112721478	FALSE	FALSE
	DCX	1641	doublecortin	X	110537006	110655460	Xq23	0.0174335	0.894819	1	STAG2	12439014	0	1		CNS:SF_268 X:108650062-112721478	FALSE	FALSE
	PAK3	5063	p21 protein (Cdc42/Rac)-activated kinase 3	X	110187512	110464173	Xq23	0.0630502	0.632232	1	STAG2	12630301	1	1	OV:OVCAR_8 X:108906466-110653358	CNS:SF_268 X:108650062-112721478	FALSE	FALSE
	AMOT	154796	angiomotin	X	112018104	112084043	Xq23	0.00636209	0.961522	1	STAG2	11010431	0	1		CNS:SF_268 X:108650062-112721478	FALSE	FALSE
	ZCCHC16	340595	zinc finger, CCHC domain containing 16	X	111326252	111700473	Xq23	0.0321954	0.808727	1	STAG2	11394001	0	1		CNS:SF_268 X:108650062-112721478	FALSE	FALSE
	STAG2	10735	stromal antigen 2	X	123094474	123236505	Xq25	0.6132	1.90337e-07	0.00310877	STAG2	0	0	1		ME:LOXIMVI X:123165768-123524277	FALSE	FALSE
	MAGEB18	286514	melanoma antigen family B, 18	X	26156459	26158853	Xp21.3	-0.129575	0.328015	1	BCOR	13751645	0	1		ME:UACC_62 X:26127724-27115259	FALSE	FALSE
	MAGEB6	158809	melanoma antigen family B, 6	X	26210556	26213763	Xp21.3	0.306866	0.0180791	1	BCOR	13696735	0	1		ME:UACC_62 X:26127724-27115259	FALSE	FALSE
	VENTXP1	139538	VENT homeobox (Xenopus laevis) pseudogene 1	X	26576453	26579169	Xp21.3	0.0950085	0.474126	1	BCOR	13331329	0	1		ME:UACC_62 X:26127724-27115259	FALSE	FALSE
	ZNF630	57232	zinc finger protein 630	X	47917566	47931025	Xp11.23	0.113756	0.386803	1	GATA1	713956	0	1		ME:SK_MEL_5 X:47865167-47966698	FALSE	FALSE
	SPACA5	389852	sperm acrosome associated 5	X	47863733	47991997	Xp11.23	0.0669982	0.614136	1	GATA1	652984	0	1		ME:SK_MEL_5 X:47865167-47966698	FALSE	FALSE
	NXT2	55916	nuclear transport factor 2-like export factor 2	X	108779009	108787927	Xq23	0.216522	0.0965793	1	STAG2	14306547	0	1		CNS:SF_268 X:108650062-112721478	FALSE	FALSE
	KCNE1L	23630	KCNE1-like	X	108866928	108868393	Xq23	0.0728454	0.580178	1	STAG2	14226081	0	1		CNS:SF_268 X:108650062-112721478	FALSE	FALSE
	RGAG1	57529	retrotransposon gag domain containing 1	X	109662284	109699562	Xq23	0.299705	0.0199958	1	STAG2	13394912	1	1	OV:OVCAR_8 X:108906466-110653358	CNS:SF_268 X:108650062-112721478	FALSE	FALSE
	ALG13	79868	asparagine-linked glycosylation 13 homolog (S. cerevisiae)	X	110924345	111003875	Xq23	0.18174	0.164607	1	STAG2	12090599	0	1		CNS:SF_268 X:108650062-112721478	FALSE	FALSE
	LHFPL1	340596	lipoma HMGIC fusion partner-like 1	X	111873878	111923375	Xq23	-0.166925	0.202394	1	STAG2	11171099	0	1		CNS:SF_268 X:108650062-112721478	FALSE	FALSE
	MCTS1	28985	malignant T cell amplified sequence 1	X	119737743	119755016	Xq24	0.703974	3.50524e-10	6.18325e-06	STAG2	3339458	0	1		ME:LOXIMVI X:119727298-119814999	FALSE	FALSE
	C1GALT1C1	29071	C1GALT1-specific chaperone 1	X	119759528	119764005	Xq24	0.396597	0.00170604	1	STAG2	3330469	0	1		ME:LOXIMVI X:119727298-119814999	FALSE	FALSE
	SH2D1A	4068	SH2 domain containing 1A	X	123480131	123507010	Xq25	0.0496679	0.706274	1	STAG2	243626	0	1		ME:LOXIMVI X:123165768-123524277	FALSE	FALSE
	PCDH11Y	83259	protocadherin 11 Y-linked	Y	4868266	5610264	Yp11.2	0.0713501	0.587997	1			1	1	OV:SK_OV_3 Y:2944440-7444609	CO:HCT_116 Y:2889102-6433463	FALSE	FALSE
	TBL1Y	90665	transducin (beta)-like 1, Y-linked	Y	6778726	6959724	Yp11.2	-0.0596616	0.650679	1			2	1	CO:HCT_116 Y:6592897-7532382,OV:SK_OV_3 Y:2944440-7444609	PR:DU_145(DTP) Y:6382579-8160153	FALSE	FALSE
	PRKY	5616	protein kinase, Y-linked	Y	7142012	7249588	Yp11.2	0.611348	2.12043e-07	0.00345546			2	1	CO:HCT_116 Y:6592897-7532382,OV:SK_OV_3 Y:2944440-7444609	PR:DU_145(DTP) Y:6382579-8160153	FALSE	FALSE
	TTTY8B	100101118	testis-specific transcript, Y-linked 8B (non-protein coding)	Y	6339071	9531308	Yp11.2	-0.153115	0.246954	1			2	1	OV:SK_OV_3 Y:2944440-7444609,PR:DU_145(DTP) Y:6094565-6377422	CO:HCT_116 Y:2889102-6433463	FALSE	FALSE
	AMELY	266	amelogenin, Y-linked	Y	6733958	6742068	Yp11.2	-0.126472	0.339828	1			3	1	CO:HCT_116 Y:6592897-7532382,LC:NCI_H322M Y:6592897-6933557,OV:SK_OV_3 Y:2944440-7444609	PR:DU_145(DTP) Y:6382579-8160153	FALSE	FALSE
	TTTY16	252948	testis-specific transcript, Y-linked 16 (non-protein coding)	Y	7567397	7569288	Yp11.2	0.0783126	0.559001	1			0	1		PR:DU_145(DTP) Y:6382579-8160153	FALSE	FALSE
	TTTY12	83867	testis-specific transcript, Y-linked 12 (non-protein coding)	Y	7672964	7678723	Yp11.2	0.0287793	0.828697	1			0	1		PR:DU_145(DTP) Y:6382579-8160153	FALSE	FALSE
	NRP1	8829	neuropilin 1	10	33466418	33623833	10p11.22	0.406867	0.00125496	1	GATA3	25349254	0	1		LC:NCI_H226 10:32299707-34077982	FALSE	FALSE
	CAMK1D	57118	calcium/calmodulin-dependent protein kinase ID	10	12391582	12871733	10p13	0.437458	0.000473788	1	GATA3	4274418	0	1		CO:HCT_15 10:12609361-12834530	FALSE	FALSE
	PRKG1	5592	protein kinase, cGMP-dependent, type I	10	52750910	54058110	10q11.23:10q21.1	-0.0303481	0.817949	1	PTEN	35565084	0	1		RE:RXF_393 10:53322504-53444466	FALSE	FALSE
	CDH23	64072	cadherin-related 23	10	73156690	73575704	10q22.1	0.268121	0.0383346	1	PTEN	16047490	0	1		PR:PC_3 10:72821182-74505124	FALSE	FALSE
	CTNNA3	29119	catenin (cadherin-associated protein), alpha 3	10	67679724	69455949	10q21.3	0.0293589	0.823787	1	PTEN	20167245	0	1		CNS:U251 10:68075986-68110629	FALSE	FALSE
	WDR96	80217	WD repeat domain 96	10	105889645	105992120	10q25.1	0.35902	0.00484685	1	PTEN	16161113	0	1		LE:SR 10:105228648-107333210	FALSE	FALSE
	C10orf76	79591	chromosome 10 open reading frame 76	10	103605355	103815932	10q24.32	0.748617	6.11594e-12	1.10582e-07	PTEN	13876823	0	1		LE:K_562 10:103605504-103778840	FALSE	FALSE
	SORCS3	22986	sortilin-related VPS10 domain containing receptor 3	10	106400858	107024993	10q25.1	-0.135695	0.305485	1	PTEN	16672326	0	1		LE:SR 10:105228648-107333210	FALSE	FALSE
	HABP2	3026	hyaluronan binding protein 2	10	115310589	115349360	10q25.3	0.125894	0.337822	1	PTEN	25582057	1	1	CNS:SF_268 10:114371995-115607553	OV:OVCAR_4 10:114143797-115794065	FALSE	FALSE
	ARMC4	55130	armadillo repeat containing 4	10	28101096	28287977	10p12.1	0.159999	0.222024	1	GATA3	19983932	0	1		LC:NCI_H226 10:27971260-31504903	FALSE	FALSE
	BAMBI	25805	BMP and activin membrane-bound inhibitor homolog (Xenopus laevis)	10	28966423	28971868	10p12.1	-0.230623	0.0762614	1	GATA3	20849259	0	1		LC:NCI_H226 10:27971260-31504903	FALSE	FALSE
	MPP7	143098	membrane protein, palmitoylated 7 (MAGUK p55 subfamily member 7)	10	28339922	28571067	10p12.1	0.00266614	0.98387	1	GATA3	20222758	0	1		LC:NCI_H226 10:27971260-31504903	FALSE	FALSE
	WAC	51322	WW domain containing adaptor with coiled-coil	10	28821421	28912041	10p12.1	0.572128	1.79189e-06	0.027923	GATA3	20704257	0	1		LC:NCI_H226 10:27971260-31504903	FALSE	FALSE
	SVIL	6840	supervillin	10	29746276	30024730	10p11.23	0.369449	0.00367155	1	GATA3	21629112	0	1		LC:NCI_H226 10:27971260-31504903	FALSE	FALSE
	ZNF438	220929	zinc finger protein 438	10	31133564	31320866	10p11.23:10p11.22	0.398628	0.00160677	1	GATA3	23016400	0	1		LC:NCI_H226 10:27971260-31504903	FALSE	FALSE
	ZEB1	6935	zinc finger E-box binding homeobox 1	10	31608100	31818742	10p11.22	0.27036	0.036687	1	GATA3	23490936	1	1	LC:NCI_H226 10:31531954-32286652	PR:PC_3 10:31593961-32592464	FALSE	FALSE
	ARHGAP12	94134	Rho GTPase activating protein 12	10	32094325	32217804	10p11.22	0.359698	0.00476146	1	GATA3	23977161	1	1	LC:NCI_H226 10:31531954-32286652	PR:PC_3 10:31593961-32592464	FALSE	FALSE
	CCDC7	221016	coiled-coil domain containing 7	10	32735040	32863492	10p11.22	0.42925	0.000692731	1	GATA3	24617876	0	1		LC:NCI_H226 10:32299707-34077982	FALSE	FALSE
	C10orf68	79741	chromosome 10 open reading frame 68	10	32856650	33171792	10p11.22	0.0889432	0.499168	1	GATA3	24739486	0	1		LC:NCI_H226 10:32299707-34077982	FALSE	FALSE
	MARCH8	220972	membrane-associated ring finger (C3HC4) 8	10	45952816	46090354	10q11.21	0.574912	1.55402e-06	0.0242972	GATA3	37835652	0	1		PR:PC_3 10:45991306-49681716	FALSE	FALSE
	FAM21C	253725	family with sequence similarity 21, member C	10	46222647	46288412	10q11.22	0.510969	3.02398e-05	0.435453	GATA3	38105483	0	1		PR:PC_3 10:45991306-49681716	FALSE	FALSE
	PTPN20A	653129	protein tyrosine phosphatase, non-receptor type 20A	10	46550122	48827924	10q11.22	-0.248295	0.057934	1	GATA3	38432958	0	1		PR:PC_3 10:45991306-49681716	FALSE	FALSE
	PTPN20B	26095	protein tyrosine phosphatase, non-receptor type 20B	10	46550122	48827924	10q11.22	0.110049	0.406683	1	GATA3	38432958	0	1		PR:PC_3 10:45991306-49681716	FALSE	FALSE
	ZNF488	118738	zinc finger protein 488	10	48355088	48373866	10q11.22	0.234458	0.0713683	1	GATA3	40237924	0	1		PR:PC_3 10:45991306-49681716	FALSE	FALSE
	ARHGAP22	58504	Rho GTPase activating protein 22	10	49654067	49864310	10q11.22	0.0094281	0.943004	1	PTEN	39758884	0	1		PR:PC_3 10:45991306-49681716	FALSE	FALSE
	FRMPD2	143162	FERM and PDZ domain containing 2	10	49364601	49482941	10q11.22	0.165628	0.209961	1	PTEN	40140253	0	1		PR:PC_3 10:45991306-49681716	FALSE	FALSE
	UNC5B	219699	unc-5 homolog B (C. elegans)	10	72972291	73062635	10q22.1	0.099659	0.448687	1	PTEN	16560559	0	1		PR:PC_3 10:72821182-74505124	FALSE	FALSE
	ASCC1	51008	activating signal cointegrator 1 complex subunit 1	10	73855789	73976892	10q22.1	0.58666	8.39557e-07	0.0133011	PTEN	15646302	0	1		PR:PC_3 10:72821182-74505124	FALSE	FALSE
	C10orf54	64115	chromosome 10 open reading frame 54	10	73507313	73533337	10q22.1	0.465981	0.000175293	1	PTEN	16089857	0	1		PR:PC_3 10:72821182-74505124	FALSE	FALSE
	ADK	132	adenosine kinase	10	75910942	76469061	10q22.2	0.594331	5.54227e-07	0.00885766	PTEN	13154133	0	1		CNS:U251 10:75924702-76319679	FALSE	FALSE
	ANXA11	311	annexin A11	10	81914879	81965328	10q22.3	0.691742	9.35528e-10	1.63736e-05	PTEN	7657866	0	1		BR:T47D 10:81689350-82133368	FALSE	FALSE
	LIPM	340654	lipase, family member M	10	90562486	90580303	10q23.31	-0.0393602	0.767247	1	PTEN	833954	0	1		CNS:SF_539 10:89260683-91160748	FALSE	FALSE
	ACTA2	59	actin, alpha 2, smooth muscle, aorta	10	90694830	90751147	10q23.31	0.150249	0.251854	1	PTEN	966298	0	1		CNS:SF_539 10:89260683-91160748	FALSE	FALSE
	SLK	9748	STE20-like kinase	10	105727469	105787342	10q24.33	0.497697	5.21093e-05	0.737243	PTEN	15998937	0	1		LE:SR 10:105228648-107333210	FALSE	FALSE
	GSTO2	119391	glutathione S-transferase omega 2	10	106028630	106059176	10q25.1	0.251532	0.0525422	1	PTEN	16300098	0	1		LE:SR 10:105228648-107333210	FALSE	FALSE
	CCDC147	159686	coiled-coil domain containing 147	10	106113521	106214848	10q25.1	0.190679	0.148007	1	PTEN	16384989	0	1		LE:SR 10:105228648-107333210	FALSE	FALSE
	TCF7L2	6934	transcription factor 7-like 2 (T-cell specific, HMG-box)	10	114710008	114927436	10q25.2:10q25.3	0.473253	0.000134116	1	PTEN	24981476	1	1	CNS:SF_268 10:114371995-115607553	OV:OVCAR_4 10:114143797-115794065	FALSE	FALSE
	CASP7	840	caspase 7, apoptosis-related cysteine peptidase	10	115438920	115490668	10q25.3	0.468671	0.000158876	1	PTEN	25710388	1	1	CNS:SF_268 10:114371995-115607553	OV:OVCAR_4 10:114143797-115794065	FALSE	FALSE
	CTBP2	1488	C-terminal binding protein 2	10	126676417	126849624	10q26.13	0.363372	0.00432129	1	PTEN	36947885	1	1	RE:A498 10:125439600-127886584	LE:K_562 10:126680180-126728384	FALSE	FALSE
	MKX	283078	mohawk homeobox	10	27961802	28034778	10p12.1	0.0198418	0.880389	1	GATA3	19844638	0	1		LC:NCI_H226 10:27971260-31504903	FALSE	FALSE
	LYZL1	84569	lysozyme-like 1	10	29577989	29600158	10p12.1:10p11.23	-0.259329	0.0473227	1	GATA3	21460825	0	1		LC:NCI_H226 10:27971260-31504903	FALSE	FALSE
	KIAA1462	57608	KIAA1462	10	30301728	30348488	10p11.23	0.11981	0.361868	1	GATA3	22184564	0	1		LC:NCI_H226 10:27971260-31504903	FALSE	FALSE
	MTPAP	55149	mitochondrial poly(A) polymerase	10	30598729	30638267	10p11.23	0.677951	2.67515e-09	4.63871e-05	GATA3	22481565	0	1		LC:NCI_H226 10:27971260-31504903	FALSE	FALSE
	MAP3K8	1326	mitogen-activated protein kinase kinase kinase 8	10	30722949	30750762	10p11.23	0.382992	0.00252518	1	GATA3	22605785	0	1		LC:NCI_H226 10:27971260-31504903	FALSE	FALSE
	LYZL2	119180	lysozyme-like 2	10	30900707	30918647	10p11.23	0.134159	0.311043	1	GATA3	22783543	0	1		LC:NCI_H226 10:27971260-31504903	FALSE	FALSE
	ITGB1	3688	integrin, beta 1 (fibronectin receptor, beta polypeptide, antigen CD29 includes MDF2, MSK12)	10	33189245	33247293	10p11.22	0.481702	9.75135e-05	1	GATA3	25072081	0	1		LC:NCI_H226 10:32299707-34077982	FALSE	FALSE
	GPRIN2	9721	G protein regulated inducer of neurite outgrowth 2	10	46993545	47000568	10q11.22	0.259334	0.0454019	1	GATA3	38876381	0	1		PR:PC_3 10:45991306-49681716	FALSE	FALSE
	SYT15	83849	synaptotagmin XV	10	46955443	46970601	10q11.22	0.200292	0.124928	1	GATA3	38838279	0	1		PR:PC_3 10:45991306-49681716	FALSE	FALSE
	ANXA8L1	728113	annexin A8-like 1	10	47157988	48271363	10q11.22	0.170809	0.195851	1	GATA3	39040824	0	1		PR:PC_3 10:45991306-49681716	FALSE	FALSE
	ANXA8L2	244	annexin A8-like 2	10	47746919	47763040	10q11.22	0.12772	0.330805	1	GATA3	39629755	0	1		PR:PC_3 10:45991306-49681716	FALSE	FALSE
	FAM21B	55747	family with sequence similarity 21, member B	10	47894022	51893269	10q11.22	0.629448	9.28769e-08	0.0015347	PTEN	37729925	0	1		PR:PC_3 10:45991306-49681716	FALSE	FALSE
	GDF10	2662	growth differentiation factor 10	10	48425787	48439138	10q11.22	0.269324	0.0391378	1	GATA3	40308623	0	1		PR:PC_3 10:45991306-49681716	FALSE	FALSE
	RBP3	5949	retinol binding protein 3, interstitial	10	48381486	48390991	10q11.22	-0.0198108	0.88161	1	GATA3	40264322	0	1		PR:PC_3 10:45991306-49681716	FALSE	FALSE
	MAPK8	5599	mitogen-activated protein kinase 8	10	49609686	49643183	10q11.22	0.528908	1.39665e-05	0.205921	PTEN	39980011	0	1		PR:PC_3 10:45991306-49681716	FALSE	FALSE
	SLC29A3	55315	solute carrier family 29 (nucleoside transporters), member 3	10	73079009	73123147	10q22.1	0.380268	0.00272608	1	PTEN	16500047	0	1		PR:PC_3 10:72821182-74505124	FALSE	FALSE
	PSAP	5660	prosaposin	10	73576054	73611082	10q22.1	-0.183867	0.159638	1	PTEN	16012112	0	1		PR:PC_3 10:72821182-74505124	FALSE	FALSE
	CHST3	9469	carbohydrate (chondroitin 6) sulfotransferase 3	10	73724119	73773322	10q22.1	0.146209	0.264974	1	PTEN	15849872	0	1		PR:PC_3 10:72821182-74505124	FALSE	FALSE
	SPOCK2	9806	sparc/osteonectin, cwcv and kazal-like domains proteoglycan (testican) 2	10	73818791	73848790	10q22.1	0.206318	0.113744	1	PTEN	15774404	0	1		PR:PC_3 10:72821182-74505124	FALSE	FALSE
	ANAPC16	119504	anaphase promoting complex subunit 16	10	73975757	73995618	10q22.1	0.636966	4.46496e-08	0.000746854	PTEN	15627576	0	1		PR:PC_3 10:72821182-74505124	FALSE	FALSE
	DDIT4	54541	DNA-damage-inducible transcript 4	10	74033676	74035797	10q22.1	0.231836	0.0746863	1	PTEN	15587397	0	1		PR:PC_3 10:72821182-74505124	FALSE	FALSE
	DNAJB12	54788	DnaJ (Hsp40) homolog, subfamily B, member 12	10	74092587	74114907	10q22.1	0.419094	0.000859584	1	PTEN	15508287	0	1		PR:PC_3 10:72821182-74505124	FALSE	FALSE
	SFTPD	6441	surfactant protein D	10	81697495	81708861	10q22.3	0.0872276	0.511228	1	PTEN	7914333	0	1		BR:T47D 10:81689350-82133368	FALSE	FALSE
	PLAC9	219348	placenta-specific 9	10	81892257	81904784	10q22.3	0.537865	1.11673e-05	0.165768	PTEN	7718410	0	1		BR:T47D 10:81689350-82133368	FALSE	FALSE
	TSPAN14	81619	tetraspanin 14	10	82214037	82282391	10q23.1	0.318087	0.0132582	1	PTEN	7340803	0	1		PR:PC_3 10:82040014-82295910	FALSE	FALSE
	MINPP1	9562	multiple inositol-polyphosphate phosphatase 1	10	89264222	89313218	10q23.2	0.53567	1.0318e-05	0.153584	PTEN	309976	1	1	OV:OVCAR_4 10:88083026-89996584	CNS:SF_539 10:89260683-91160748	FALSE	FALSE
	PAPSS2	9060	3'-phosphoadenosine 5'-phosphosulfate synthase 2	10	89419475	89507462	10q23.2:10q23.31	0.262115	0.0430578	1	PTEN	115732	1	1	OV:OVCAR_4 10:88083026-89996584	CNS:SF_539 10:89260683-91160748	FALSE	FALSE
	LIPN	643418	lipase, family member N	10	90521162	90537999	10q23.31	-0.174228	0.186916	1	PTEN	792630	0	1		CNS:SF_539 10:89260683-91160748	FALSE	FALSE
	STAMBPL1	57559	STAM binding protein-like 1	10	90639943	90683259	10q23.31	0.398241	0.00162527	1	PTEN	911411	0	1		CNS:SF_539 10:89260683-91160748	FALSE	FALSE
	ANKRD22	118932	ankyrin repeat domain 22	10	90579658	90611732	10q23.31	0.176665	0.176919	1	PTEN	851126	0	1		CNS:SF_539 10:89260683-91160748	FALSE	FALSE
	FAS	355	Fas (TNF receptor superfamily, member 6)	10	90750287	90775542	10q23.31	0.239558	0.0652534	1	PTEN	1021755	0	1		CNS:SF_539 10:89260683-91160748	FALSE	FALSE
	LIPA	3988	lipase A, lysosomal acid, cholesterol esterase	10	90973325	91011660	10q23.31	0.550297	5.23943e-06	0.0795922	PTEN	1244793	0	1		CNS:SF_539 10:89260683-91160748	FALSE	FALSE
	IFIT2	3433	interferon-induced protein with tetratricopeptide repeats 2	10	91061705	91069033	10q23.31	0.13253	0.317009	1	PTEN	1333173	0	1		CNS:SF_539 10:89260683-91160748	FALSE	FALSE
	CH25H	9023	cholesterol 25-hydroxylase	10	90965693	90967071	10q23.31	-0.0633885	0.630402	1	PTEN	1237161	0	1		CNS:SF_539 10:89260683-91160748	FALSE	FALSE
	IFIT1	3434	interferon-induced protein with tetratricopeptide repeats 1	10	91152302	91166244	10q23.31	0.303254	0.0185057	1	PTEN	1423770	0	1		CNS:SF_539 10:89260683-91160748	FALSE	FALSE
	FAM178A	55719	family with sequence similarity 178, member A	10	102672325	102724891	10q24.31	0.530906	1.27801e-05	0.188992	PTEN	12943793	1	1	OV:OVCAR_3 10:102530368-103038688	CNS:SF_268 10:102668830-102719876	FALSE	FALSE
	ACTR1A	10121	ARP1 actin-related protein 1 homolog A, centractin alpha (yeast)	10	104238985	104262512	10q24.32	0.581379	1.11056e-06	0.017478	PTEN	14510453	0	1		OV:SK_OV_3 10:104233860-105212924	FALSE	FALSE
	TMEM180	79847	transmembrane protein 180	10	104221169	104236802	10q24.32	0.473672	0.000151102	1	PTEN	14492637	0	1		OV:SK_OV_3 10:104233860-105212924	FALSE	FALSE
	CALHM1	255022	calcium homeostasis modulator 1	10	105213143	105218648	10q24.33	-0.0490234	0.71725	1	PTEN	15484611	0	1		OV:OVCAR_4 10:104264144-105652437	FALSE	FALSE
	COL17A1	1308	collagen, type XVII, alpha 1	10	105791045	105845638	10q24.33:10q25.1	0.0902859	0.492686	1	PTEN	16062513	0	1		LE:SR 10:105228648-107333210	FALSE	FALSE
	GSTO1	9446	glutathione S-transferase omega 1	10	106013951	106027222	10q25.1	0.200125	0.125249	1	PTEN	16285419	0	1		LE:SR 10:105228648-107333210	FALSE	FALSE
	ITPRIP	85450	inositol 1,4,5-triphosphate receptor interacting protein	10	106069453	106098251	10q25.1	0.0601172	0.648186	1	PTEN	16340921	0	1		LE:SR 10:105228648-107333210	FALSE	FALSE
	NRAP	4892	nebulin-related anchoring protein	10	115348582	115423829	10q25.3	-0.0123421	0.926081	1	PTEN	25620050	1	1	CNS:SF_268 10:114371995-115607553	OV:OVCAR_4 10:114143797-115794065	FALSE	FALSE
	C10orf118	55088	chromosome 10 open reading frame 118	10	115881973	115934364	10q25.3	0.490326	6.98247e-05	0.977267	PTEN	26153441	1	1	OV:OVCAR_4 10:115814322-116215188	CNS:SF_268 10:115899555-115938667	FALSE	FALSE
	GLYATL1	92292	glycine-N-acyltransferase-like 1	11	58695101	58724543	11q12.1	0.149251	0.255052	1	MEN1	5846442	0	1		LC:NCI_H322M 11:57633661-60123634	FALSE	FALSE
	ARHGAP42	143872	Rho GTPase activating protein 42	11	100558406	100861656	11q22.1	0.506618	3.62358e-05	0.518897	ATM	7231902	0	1		LC:EKVX 11:99451993-100885639	FALSE	FALSE
	NELL1	4745	NEL-like 1 (chicken)	11	20691116	21597229	11p15.1	-0.000625304	0.996217	1	WT1	10812092	0	1		LE:CCRF_CEM 11:20635533-22037188	FALSE	FALSE
	MPPED2	744	metallophosphoesterase domain containing 2	11	30406039	30607930	11p14.1	0.0535448	0.684505	1	WT1	1801391	0	1		LC:HOP_92 11:29394214-32523131	FALSE	FALSE
	IMMP1L	196294	IMP1 inner mitochondrial membrane peptidase-like (S. cerevisiae)	11	31453948	31531169	11p13	0.656364	1.66134e-08	0.000281947	WT1	878152	0	1		LC:HOP_92 11:29394214-32523131	FALSE	FALSE
	TMEM151A	256472	transmembrane protein 151A	11	66059372	66064135	11q13.2	0.415524	0.000961424	1	MEN1	1480606	0	1		CNS:SF_295 11:65763081-68599682	FALSE	FALSE
	LRP5	4041	low density lipoprotein receptor-related protein 5	11	68080107	68216743	11q13.2	0.387465	0.00222375	1	MEN1	3501341	2	1	ME:SK_MEL_28 11:67553656-68578406,RE:TK_10 11:67421267-70356321	CNS:SF_295 11:65763081-68599682	FALSE	FALSE
	CTTN	2017	cortactin	11	70244611	70282690	11q13.3	0.530471	1.30297e-05	0.192552	MEN1	5665845	2	1	ME:SK_MEL_5 11:68544562-72066913,RE:TK_10 11:67421267-70356321	ME:SK_MEL_28 11:69663418-70864179	FALSE	FALSE
	EED	8726	embryonic ectoderm development	11	85955805	85989785	11q14.2	0.793486	4.03139e-14	7.39357e-10	MEN1	21377039	1	1	LC:NCI_H322M 11:85197684-86543625	PR:PC_3 11:85659850-86572604	FALSE	FALSE
	PDGFD	80310	platelet derived growth factor D	11	103777913	104035027	11q22.3	-0.0677644	0.606936	1	ATM	4058531	0	1		CNS:SF_268 11:103368043-105837661	FALSE	FALSE
	DCDC5	196296	doublecortin domain containing 5	11	30885149	31014233	11p13	-0.00718994	0.956519	1	WT1	1395088	0	1		LC:HOP_92 11:29394214-32523131	FALSE	FALSE
	DCDC1	341019	doublecortin domain containing 1	11	31284170	31391357	11p13	0.214774	0.102356	1	WT1	1017964	0	1		LC:HOP_92 11:29394214-32523131	FALSE	FALSE
	RCN1	5954	reticulocalbin 1, EF-hand calcium binding domain	11	32112476	32127272	11p13	-0.05877	0.658385	1	WT1	282049	1	1	LC:NCI_H322M 11:32080821-33501371	LC:HOP_92 11:29394214-32523131	FALSE	FALSE
	ELP4	26610	elongation protein 4 homolog (S. cerevisiae)	11	31531296	31805329	11p13	0.665377	6.64636e-09	0.000114045	WT1	603992	0	1		LC:HOP_92 11:29394214-32523131	FALSE	FALSE
	PRG3	10394	proteoglycan 3	11	57144241	57148623	11q12.1	0.0789996	0.552007	1	MEN1	7422362	0	1		LC:NCI_H322M 11:55392993-57201410	FALSE	FALSE
	LPXN	9404	leupaxin	11	58294343	58345639	11q12.1	0.151177	0.248901	1	MEN1	6225346	0	1		LC:NCI_H322M 11:57633661-60123634	FALSE	FALSE
	OR9Q1	219956	olfactory receptor, family 9, subfamily Q, member 1	11	57791352	57949038	11q12.1	0.120286	0.364158	1	MEN1	6621947	0	1		LC:NCI_H322M 11:57633661-60123634	FALSE	FALSE
	TMEM109	79073	transmembrane protein 109	11	60681370	60690915	11q12.2	0.445464	0.000361543	1	MEN1	3880070	1	1	LC:NCI_H322M 11:60127014-63852595	LE:RPMI_8226 11:58805601-60688506	FALSE	FALSE
	MS4A7	58475	membrane-spanning 4-domains, subfamily A, member 7	11	60145957	60163426	11q12.2	-4.60998e-05	0.999721	1	MEN1	4407559	1	1	LC:NCI_H322M 11:60127014-63852595	LE:RPMI_8226 11:58805601-60688506	FALSE	FALSE
	MS4A10	341116	membrane-spanning 4-domains, subfamily A, member 10	11	60552820	60568778	11q12.2	-0.0547749	0.680309	1	MEN1	4002207	1	1	LC:NCI_H322M 11:60127014-63852595	LE:RPMI_8226 11:58805601-60688506	FALSE	FALSE
	SLC22A9	114571	solute carrier family 22 (organic anion transporter), member 9	11	63137260	63177712	11q12.3	0.112453	0.396449	1	MEN1	1393273	1	1	LC:NCI_H322M 11:60127014-63852595	LC:HOP_62 11:62698979-64133652	FALSE	FALSE
	RARRES3	5920	retinoic acid receptor responder (tazarotene induced) 3	11	63304272	63313930	11q12.3	0.208225	0.110371	1	MEN1	1257055	1	1	LC:NCI_H322M 11:60127014-63852595	LC:HOP_62 11:62698979-64133652	FALSE	FALSE
	ATL3	25923	atlastin GTPase 3	11	63396436	63439083	11q12.3:11q13.1	0.282425	0.0287893	1	MEN1	1131902	1	1	LC:NCI_H322M 11:60127014-63852595	LC:HOP_62 11:62698979-64133652	FALSE	FALSE
	PACS1	55690	phosphofurin acidic cluster sorting protein 1	11	65837823	66012218	11q13.1:11q13.2	0.583738	9.80678e-07	0.0154741	MEN1	1259057	0	1		CNS:SF_295 11:65763081-68599682	FALSE	FALSE
	ACTN3	89	actinin, alpha 3	11	66313865	66330799	11q13.2	0.0118513	0.929013	1	MEN1	1735099	0	1		CNS:SF_295 11:65763081-68599682	FALSE	FALSE
	SPTBN2	6712	spectrin, beta, non-erythrocytic 2	11	66452719	66488870	11q13.2	0.415369	0.000966075	1	MEN1	1873953	0	1		CNS:SF_295 11:65763081-68599682	FALSE	FALSE
	NPAS4	266743	neuronal PAS domain protein 4	11	66188474	66194177	11q13.2	0.193783	0.141397	1	MEN1	1609708	0	1		CNS:SF_295 11:65763081-68599682	FALSE	FALSE
	C11orf80	79703	chromosome 11 open reading frame 80	11	66512206	66610987	11q13.2	0.580942	1.13635e-06	0.0178748	MEN1	1933440	0	1		CNS:SF_295 11:65763081-68599682	FALSE	FALSE
	UNC93B1	81622	unc-93 homolog B1 (C. elegans)	11	67758574	67771593	11q13.2	0.469828	0.000152254	1	MEN1	3179808	2	1	ME:SK_MEL_28 11:67553656-68578406,RE:TK_10 11:67421267-70356321	CNS:SF_295 11:65763081-68599682	FALSE	FALSE
	PPP6R3	55291	protein phosphatase 6, regulatory subunit 3	11	68228185	68382801	11q13.2	0.818829	1.31892e-15	2.43025e-11	MEN1	3649419	2	1	ME:SK_MEL_28 11:67553656-68578406,RE:TK_10 11:67421267-70356321	CNS:SF_295 11:65763081-68599682	FALSE	FALSE
	IGHMBP2	3508	immunoglobulin mu binding protein 2	11	68671318	68708069	11q13.3	0.855354	3.2875e-18	6.07595e-14	MEN1	4092552	3	1	CNS:SF_295 11:68619376-69645892,ME:SK_MEL_5 11:68544562-72066913,RE:TK_10 11:67421267-70356321	ME:SK_MEL_28 11:68595388-68831059	FALSE	FALSE
	PPFIA1	8500	protein tyrosine phosphatase, receptor type, f polypeptide (PTPRF), interacting protein (liprin), alpha 1	11	70116805	70230607	11q13.3	0.79491	3.36919e-14	6.18111e-10	MEN1	5538039	2	1	ME:SK_MEL_5 11:68544562-72066913,RE:TK_10 11:67421267-70356321	ME:SK_MEL_28 11:69663418-70864179	FALSE	FALSE
	ANO1	55107	anoctamin 1, calcium activated chloride channel	11	69924407	70035652	11q13.3	-0.0346033	0.792954	1	MEN1	5345641	2	1	ME:SK_MEL_5 11:68544562-72066913,RE:TK_10 11:67421267-70356321	ME:SK_MEL_28 11:69663418-70864179	FALSE	FALSE
	ARRB1	408	arrestin, beta 1	11	74971165	75062875	11q13.4	0.26912	0.0375922	1	MEN1	10392399	1	1	ME:SK_MEL_2 11:74790843-75257655	OV:OVCAR_3 11:73255955-75102625	FALSE	FALSE
	RAB30	27314	RAB30, member RAS oncogene family	11	82692477	82782884	11q14.1	0.617905	1.44207e-07	0.00236644	MEN1	18113711	2	1	LC:NCI_H322M 11:81144725-82971840,OV:NCI_ADR_RES 11:81856929-83602399	LC:EKVX 11:82258473-83807445	FALSE	FALSE
	PRCP	5547	prolylcarboxypeptidase (angiotensinase C)	11	82535408	82611557	11q14.1	0.258341	0.0462635	1	MEN1	17956642	2	1	LC:NCI_H322M 11:81144725-82971840,OV:NCI_ADR_RES 11:81856929-83602399	LC:EKVX 11:82258473-83807445	FALSE	FALSE
	FAM181B	220382	family with sequence similarity 181, member B	11	82443045	82444906	11q14.1	0.232447	0.0764586	1	MEN1	17864279	2	1	LC:NCI_H322M 11:81144725-82971840,OV:NCI_ADR_RES 11:81856929-83602399	LC:EKVX 11:82258473-83807445	FALSE	FALSE
	PICALM	8301	phosphatidylinositol binding clathrin assembly protein	11	85668213	85780923	11q14.2	0.563458	2.76914e-06	0.0427112	MEN1	21089447	1	1	LC:NCI_H322M 11:85197684-86543625	PR:PC_3 11:85659850-86572604	FALSE	FALSE
	CCDC81	60494	coiled-coil domain containing 81	11	86085777	86134151	11q14.2	0.197754	0.12988	1	MEN1	21507011	1	1	LC:NCI_H322M 11:85197684-86543625	PR:PC_3 11:85659850-86572604	FALSE	FALSE
	ME3	10873	malic enzyme 3, NADP(+)-dependent, mitochondrial	11	86152149	86383678	11q14.2	0.200363	0.124791	1	MEN1	21573383	1	1	LC:NCI_H322M 11:85197684-86543625	PR:PC_3 11:85659850-86572604	FALSE	FALSE
	KIAA1731	85459	KIAA1731	11	93394815	93463522	11q21	0.738247	1.68418e-11	3.03018e-07	ATM	14630036	0	1		LC:NCI_H322M 11:93103561-93481602	FALSE	FALSE
	GUCY1A2	2977	guanylate cyclase 1, soluble, alpha 2	11	106544737	106889171	11q22.3	0.168776	0.197364	1	ATM	1204387	0	1		LC:NCI_H322M 11:106479912-106579594	FALSE	FALSE
	KIRREL3	84623	kin of IRRE like 3 (Drosophila)	11	126293395	126870766	11q24.2	-0.0259882	0.843747	1	ATM	18053569	0	1		LC:HOP_62 11:126495608-127203698	FALSE	FALSE
	SLC6A5	9152	solute carrier family 6 (neurotransmitter transporter, glycine), member 5	11	20620945	20676610	11p15.1	-0.0384258	0.772623	1	WT1	11732711	0	1		LE:CCRF_CEM 11:20635533-22037188	FALSE	FALSE
	KCNA4	3739	potassium voltage-gated channel, shaker-related subfamily, member 4	11	30031287	30038577	11p14.1	-0.13673	0.297538	1	WT1	2370744	0	1		LC:HOP_92 11:29394214-32523131	FALSE	FALSE
	FSHB	2488	follicle stimulating hormone, beta polypeptide	11	30252562	30256824	11p14.1	0.00606653	0.963628	1	WT1	2152497	0	1		LC:HOP_92 11:29394214-32523131	FALSE	FALSE
	DNAJC24	120526	DnaJ (Hsp40) homolog, subfamily C, member 24	11	31391376	31454382	11p13	0.721922	7.56282e-11	1.34943e-06	WT1	954939	0	1		LC:HOP_92 11:29394214-32523131	FALSE	FALSE
	PAX6	5080	paired box 6	11	31806339	31839509	11p13	0.324381	0.011453	1	WT1	569812	0	1		LC:HOP_92 11:29394214-32523131	FALSE	FALSE
	WT1	7490	Wilms tumor 1	11	32409321	32457081	11p13	0.273351	0.0361883	1	WT1	0	1	1	LC:NCI_H322M 11:32080821-33501371	LC:HOP_92 11:29394214-32523131	FALSE	FALSE
	WT1-AS	51352	WT1 antisense RNA (non-protein coding)	11	32457284	32461620	11p13	0.248339	0.0557158	1	WT1	203	1	1	LC:NCI_H322M 11:32080821-33501371	LC:HOP_92 11:29394214-32523131	FALSE	FALSE
	OR5L2	26338	olfactory receptor, family 5, subfamily L, member 2	11	55594694	55595630	11q11	0.0292894	0.824197	1	MEN1	8975355	0	1		LC:NCI_H322M 11:55392993-57201410	FALSE	FALSE
	OR5L1	219437	olfactory receptor, family 5, subfamily L, member 1	11	55578942	55579878	11q11	0.114199	0.389108	1	MEN1	8991107	0	1		LC:NCI_H322M 11:55392993-57201410	FALSE	FALSE
	OR5AS1	219447	olfactory receptor, family 5, subfamily AS, member 1	11	55797894	55798869	11q12.1	-0.0889752	0.506573	1	MEN1	8772116	0	1		LC:NCI_H322M 11:55392993-57201410	FALSE	FALSE
	OR8K5	219453	olfactory receptor, family 8, subfamily K, member 5	11	55926869	55927793	11q12.1	-0.137568	0.298794	1	MEN1	8643192	0	1		LC:NCI_H322M 11:55392993-57201410	FALSE	FALSE
	OR5J2	282775	olfactory receptor, family 5, subfamily J, member 2	11	55944093	55945032	11q12.1	0.00922512	0.944715	1	MEN1	8625953	0	1		LC:NCI_H322M 11:55392993-57201410	FALSE	FALSE
	OR8H3	390152	olfactory receptor, family 8, subfamily H, member 3	11	55889848	55890787	11q12.1	0.0712294	0.59189	1	MEN1	8680198	0	1		LC:NCI_H322M 11:55392993-57201410	FALSE	FALSE
	OR5T1	390155	olfactory receptor, family 5, subfamily T, member 1	11	56043114	56044095	11q12.1	-0.226308	0.0847884	1	MEN1	8526890	0	1		LC:NCI_H322M 11:55392993-57201410	FALSE	FALSE
	OR5T3	390154	olfactory receptor, family 5, subfamily T, member 3	11	56019675	56020698	11q12.1	-0.187655	0.154665	1	MEN1	8550287	0	1		LC:NCI_H322M 11:55392993-57201410	FALSE	FALSE
	OR5R1	219479	olfactory receptor, family 5, subfamily R, member 1	11	56184733	56185708	11q12.1	0.054191	0.683536	1	MEN1	8385277	0	1		LC:NCI_H322M 11:55392993-57201410	FALSE	FALSE
	OR8K1	390157	olfactory receptor, family 8, subfamily K, member 1	11	56113514	56114474	11q12.1	0.0164669	0.901484	1	MEN1	8456511	0	1		LC:NCI_H322M 11:55392993-57201410	FALSE	FALSE
	OR5M11	219487	olfactory receptor, family 5, subfamily M, member 11	11	56309815	56310733	11q12.1	-0.0683217	0.607139	1	MEN1	8260252	0	1		LC:NCI_H322M 11:55392993-57201410	FALSE	FALSE
	OR5M8	219484	olfactory receptor, family 5, subfamily M, member 8	11	56257910	56258846	11q12.1	-0.152128	0.25005	1	MEN1	8312139	0	1		LC:NCI_H322M 11:55392993-57201410	FALSE	FALSE
	OR5M3	219482	olfactory receptor, family 5, subfamily M, member 3	11	56236963	56238014	11q12.1	-0.100476	0.448944	1	MEN1	8332971	0	1		LC:NCI_H322M 11:55392993-57201410	FALSE	FALSE
	OR5AP2	338675	olfactory receptor, family 5, subfamily AP, member 2	11	56408964	56409915	11q12.1	0.207585	0.111494	1	MEN1	8161070	0	1		LC:NCI_H322M 11:55392993-57201410	FALSE	FALSE
	OR5AR1	219493	olfactory receptor, family 5, subfamily AR, member 1	11	56431161	56432094	11q12.1	0.055378	0.676982	1	MEN1	8138891	0	1		LC:NCI_H322M 11:55392993-57201410	FALSE	FALSE
	OR9G1	390174	olfactory receptor, family 9, subfamily G, member 1	11	56467863	56468781	11q12.1	0.366431	0.00431189	1	MEN1	8102204	0	1		LC:NCI_H322M 11:55392993-57201410	FALSE	FALSE
	OR5M1	390168	olfactory receptor, family 5, subfamily M, member 1	11	56380030	56380978	11q12.1	-0.273904	0.0357986	1	MEN1	8190007	0	1		LC:NCI_H322M 11:55392993-57201410	FALSE	FALSE
	OR5AK2	390181	olfactory receptor, family 5, subfamily AK, member 2	11	56756388	56757318	11q12.1	0.00977312	0.941437	1	MEN1	7813667	0	1		LC:NCI_H322M 11:55392993-57201410	FALSE	FALSE
	APLNR	187	apelin receptor	11	57001051	57004927	11q12.1	0.0859371	0.517522	1	MEN1	7566058	0	1		LC:NCI_H322M 11:55392993-57201410	FALSE	FALSE
	LRRC55	219527	leucine rich repeat containing 55	11	56949220	56959188	11q12.1	0.0111653	0.933112	1	MEN1	7611797	0	1		LC:NCI_H322M 11:55392993-57201410	FALSE	FALSE
	TNKS1BP1	85456	tankyrase 1 binding protein 1, 182kDa	11	57067102	57092413	11q12.1	0.294775	0.0234282	1	MEN1	7478572	0	1		LC:NCI_H322M 11:55392993-57201410	FALSE	FALSE
	P2RX3	5024	purinergic receptor P2X, ligand-gated ion channel, 3	11	57105840	57137549	11q12.1	0.013744	0.917713	1	MEN1	7433436	0	1		LC:NCI_H322M 11:55392993-57201410	FALSE	FALSE
	SSRP1	6749	structure specific recognition protein 1	11	57093458	57103351	11q12.1	0.772381	4.93116e-13	8.99641e-09	MEN1	7467634	0	1		LC:NCI_H322M 11:55392993-57201410	FALSE	FALSE
	SLC43A3	29015	solute carrier family 43, member 3	11	57174426	57195053	11q12.1	0.209264	0.108565	1	MEN1	7375932	0	1		LC:NCI_H322M 11:55392993-57201410	FALSE	FALSE
	PRG2	5553	proteoglycan 2, bone marrow (natural killer cell activator, eosinophil granule major basic protein)	11	57154833	57158130	11q12.1	0.114805	0.382413	1	MEN1	7412855	0	1		LC:NCI_H322M 11:55392993-57201410	FALSE	FALSE
	OR9I1	219954	olfactory receptor, family 9, subfamily I, member 1	11	57885971	57886916	11q12.1	0.361983	0.0048448	1	MEN1	6684069	0	1		LC:NCI_H322M 11:57633661-60123634	FALSE	FALSE
	OR10W1	81341	olfactory receptor, family 10, subfamily W, member 1	11	58034263	58035732	11q12.1	-0.0191101	0.885769	1	MEN1	6535253	0	1		LC:NCI_H322M 11:57633661-60123634	FALSE	FALSE
	OR1S1	219959	olfactory receptor, family 1, subfamily S, member 1	11	57982216	57983194	11q12.1	0.179261	0.174305	1	MEN1	6587791	0	1		LC:NCI_H322M 11:57633661-60123634	FALSE	FALSE
	OR5B21	219968	olfactory receptor, family 5, subfamily B, member 21	11	58274648	58275578	11q12.1	-0.027255	0.837644	1	MEN1	6295407	0	1		LC:NCI_H322M 11:57633661-60123634	FALSE	FALSE
	CNTF	1270	ciliary neurotrophic factor	11	58390145	58393205	11q12.1	0.447781	0.000376359	1	MEN1	6177780	0	1		LC:NCI_H322M 11:57633661-60123634	FALSE	FALSE
	ZFP91	80829	zinc finger protein 91 homolog (mouse)	11	58346586	58389023	11q12.1	0.0141915	0.915043	1	MEN1	6181962	0	1		LC:NCI_H322M 11:57633661-60123634	FALSE	FALSE
	ZFP91-CNTF	386607	ZFP91-CNTF readthrough transcript	11	58346586	58393205	11q12.1	0.437441	0.000474061	1	MEN1	6177780	0	1		LC:NCI_H322M 11:57633661-60123634	FALSE	FALSE
	GLYAT	10249	glycine-N-acyltransferase	11	58476229	58499447	11q12.1	0.115427	0.379821	1	MEN1	6071538	0	1		LC:NCI_H322M 11:57633661-60123634	FALSE	FALSE
	GLYATL2	219970	glycine-N-acyltransferase-like 2	11	58601539	58611997	11q12.1	0.0746471	0.570821	1	MEN1	5958988	0	1		LC:NCI_H322M 11:57633661-60123634	FALSE	FALSE
	MS4A14	84689	membrane-spanning 4-domains, subfamily A, member 14	11	60163486	60185228	11q12.2	0.185741	0.158992	1	MEN1	4385757	1	1	LC:NCI_H322M 11:60127014-63852595	LE:RPMI_8226 11:58805601-60688506	FALSE	FALSE
	MS4A1	931	membrane-spanning 4-domains, subfamily A, member 1	11	60223281	60238225	11q12.2	-0.181337	0.16556	1	MEN1	4332760	1	1	LC:NCI_H322M 11:60127014-63852595	LE:RPMI_8226 11:58805601-60688506	FALSE	FALSE
	MS4A5	64232	membrane-spanning 4-domains, subfamily A, member 5	11	60197061	60215265	11q12.2	0.133489	0.313489	1	MEN1	4355720	1	1	LC:NCI_H322M 11:60127014-63852595	LE:RPMI_8226 11:58805601-60688506	FALSE	FALSE
	MS4A12	54860	membrane-spanning 4-domains, subfamily A, member 12	11	60260250	60274901	11q12.2	-0.225504	0.0859315	1	MEN1	4296084	1	1	LC:NCI_H322M 11:60127014-63852595	LE:RPMI_8226 11:58805601-60688506	FALSE	FALSE
	MS4A15	219995	membrane-spanning 4-domains, subfamily A, member 15	11	60524339	60544204	11q12.2	-0.0249051	0.851476	1	MEN1	4026781	1	1	LC:NCI_H322M 11:60127014-63852595	LE:RPMI_8226 11:58805601-60688506	FALSE	FALSE
	PRPF19	27339	PRP19/PSO4 pre-mRNA processing factor 19 homolog (S. cerevisiae)	11	60658019	60674061	11q12.2	0.548021	5.8344e-06	0.088397	MEN1	3896924	1	1	LC:NCI_H322M 11:60127014-63852595	LE:RPMI_8226 11:58805601-60688506	FALSE	FALSE
	ZP1	22917	zona pellucida glycoprotein 1 (sperm receptor)	11	60635014	60643164	11q12.2	-0.22088	0.0927345	1	MEN1	3927821	1	1	LC:NCI_H322M 11:60127014-63852595	LE:RPMI_8226 11:58805601-60688506	FALSE	FALSE
	CCDC86	79080	coiled-coil domain containing 86	11	60609428	60618561	11q12.2	0.40185	0.00145985	1	MEN1	3952424	1	1	LC:NCI_H322M 11:60127014-63852595	LE:RPMI_8226 11:58805601-60688506	FALSE	FALSE
	SLC22A6	9356	solute carrier family 22 (organic anion transporter), member 6	11	62744068	62752495	11q12.3	0.0161299	0.903491	1	MEN1	1818490	1	1	LC:NCI_H322M 11:60127014-63852595	LC:HOP_62 11:62698979-64133652	FALSE	FALSE
	SLC22A8	9376	solute carrier family 22 (organic anion transporter), member 8	11	62760295	62783317	11q12.3	-0.0415938	0.754442	1	MEN1	1787668	1	1	LC:NCI_H322M 11:60127014-63852595	LC:HOP_62 11:62698979-64133652	FALSE	FALSE
	SLC22A24	283238	solute carrier family 22, member 24	11	62847411	62911693	11q12.3	0.153902	0.244506	1	MEN1	1659292	1	1	LC:NCI_H322M 11:60127014-63852595	LC:HOP_62 11:62698979-64133652	FALSE	FALSE
	SLC22A25	387601	solute carrier family 22, member 25	11	62931295	62997124	11q12.3	0.222733	0.0899593	1	MEN1	1573861	1	1	LC:NCI_H322M 11:60127014-63852595	LC:HOP_62 11:62698979-64133652	FALSE	FALSE
	SLC22A10	387775	solute carrier family 22, member 10	11	63057429	63079246	11q12.3	0.173412	0.189021	1	MEN1	1491739	1	1	LC:NCI_H322M 11:60127014-63852595	LC:HOP_62 11:62698979-64133652	FALSE	FALSE
	HRASLS5	117245	HRAS-like suppressor family, member 5	11	63228875	63258680	11q12.3	0.0731633	0.578522	1	MEN1	1312305	1	1	LC:NCI_H322M 11:60127014-63852595	LC:HOP_62 11:62698979-64133652	FALSE	FALSE
	LGALS12	85329	lectin, galactoside-binding, soluble, 12	11	63273523	63284246	11q12.3	0.0716471	0.58644	1	MEN1	1286739	1	1	LC:NCI_H322M 11:60127014-63852595	LC:HOP_62 11:62698979-64133652	FALSE	FALSE
	PLA2G16	11145	phospholipase A2, group XVI	11	63341943	63381941	11q12.3	0.270297	0.0367329	1	MEN1	1189044	1	1	LC:NCI_H322M 11:60127014-63852595	LC:HOP_62 11:62698979-64133652	FALSE	FALSE
	HRASLS2	54979	HRAS-like suppressor 2	11	63320241	63330855	11q12.3	0.393624	0.00186128	1	MEN1	1240130	1	1	LC:NCI_H322M 11:60127014-63852595	LC:HOP_62 11:62698979-64133652	FALSE	FALSE
	RTN3	10313	reticulon 3	11	63448921	63527363	11q13.1	0.573664	1.65669e-06	0.0258643	MEN1	1043622	1	1	LC:NCI_H322M 11:60127014-63852595	LC:HOP_62 11:62698979-64133652	FALSE	FALSE
	C11orf95	65998	chromosome 11 open reading frame 95	11	63527363	63536113	11q13.1	0.494338	5.95917e-05	0.839111	MEN1	1034872	1	1	LC:NCI_H322M 11:60127014-63852595	LC:HOP_62 11:62698979-64133652	FALSE	FALSE
	MARK2	2011	MAP/microtubule affinity-regulating kinase 2	11	63606399	63678492	11q13.1	0.598479	4.40764e-07	0.00707911	MEN1	892493	1	1	LC:NCI_H322M 11:60127014-63852595	LC:HOP_62 11:62698979-64133652	FALSE	FALSE
	RCOR2	283248	REST corepressor 2	11	63678692	63684316	11q13.1	-0.0135007	0.919164	1	MEN1	886669	1	1	LC:NCI_H322M 11:60127014-63852595	LC:HOP_62 11:62698979-64133652	FALSE	FALSE
	C11orf84	144097	chromosome 11 open reading frame 84	11	63580922	63595190	11q13.1	0.378764	0.00284296	1	MEN1	975795	1	1	LC:NCI_H322M 11:60127014-63852595	LC:HOP_62 11:62698979-64133652	FALSE	FALSE
	OTUB1	55611	OTU domain, ubiquitin aldehyde binding 1	11	63753324	63765892	11q13.1	0.610292	2.25435e-07	0.00366963	MEN1	805093	1	1	LC:NCI_H322M 11:60127014-63852595	LC:HOP_62 11:62698979-64133652	FALSE	FALSE
	COX8A	1351	cytochrome c oxidase subunit VIIIA (ubiquitous)	11	63742078	63744015	11q13.1	0.642578	3.11293e-08	0.000523563	MEN1	826970	1	1	LC:NCI_H322M 11:60127014-63852595	LC:HOP_62 11:62698979-64133652	FALSE	FALSE
	NAA40	79829	N(alpha)-acetyltransferase 40, NatD catalytic subunit, homolog (S. cerevisiae)	11	63706441	63724446	11q13.1	0.770515	6.0742e-13	1.10763e-08	MEN1	846539	1	1	LC:NCI_H322M 11:60127014-63852595	LC:HOP_62 11:62698979-64133652	FALSE	FALSE
	TRMT112	51504	tRNA methyltransferase 11-2 homolog (S. cerevisiae)	11	64084164	64085033	11q13.1	0.539685	8.59361e-06	0.128621	MEN1	485952	0	1		LC:HOP_62 11:62698979-64133652	FALSE	FALSE
	NUDT22	84304	nudix (nucleoside diphosphate linked moiety X)-type motif 22	11	63993729	63997488	11q13.1	0.427579	0.00073069	1	MEN1	573497	0	1		LC:HOP_62 11:62698979-64133652	FALSE	FALSE
	KCNK4	50801	potassium channel, subfamily K, member 4	11	64058792	64067503	11q13.1	0.0930869	0.483153	1	MEN1	503482	0	1		LC:HOP_62 11:62698979-64133652	FALSE	FALSE
	PRDX5	25824	peroxiredoxin 5	11	64085559	64089295	11q13.1	0.381652	0.00262226	1	MEN1	481690	0	1		LC:HOP_62 11:62698979-64133652	FALSE	FALSE
	FERMT3	83706	fermitin family member 3	11	63974151	63991363	11q13.1	-0.006216	0.962404	1	MEN1	579622	0	1		LC:HOP_62 11:62698979-64133652	FALSE	FALSE
	GPR137	56834	G protein-coupled receptor 137	11	64051810	64056972	11q13.1	0.247873	0.0561922	1	MEN1	514013	0	1		LC:HOP_62 11:62698979-64133652	FALSE	FALSE
	TRPT1	83707	tRNA phosphotransferase 1	11	63991270	63993726	11q13.1	0.497106	5.33583e-05	0.754167	MEN1	577259	0	1		LC:HOP_62 11:62698979-64133652	FALSE	FALSE
	PLCB3	5331	phospholipase C, beta 3 (phosphatidylinositol-specific)	11	64018994	64036924	11q13.1	0.44258	0.000398839	1	MEN1	534061	0	1		LC:HOP_62 11:62698979-64133652	FALSE	FALSE
	ESRRA	2101	estrogen-related receptor alpha	11	64073043	64084210	11q13.1	0.301648	0.019168	1	MEN1	486775	0	1		LC:HOP_62 11:62698979-64133652	FALSE	FALSE
	BAD	572	BCL2-associated agonist of cell death	11	64037299	64052176	11q13.1	0.493761	6.09729e-05	0.857706	MEN1	518809	0	1		LC:HOP_62 11:62698979-64133652	FALSE	FALSE
	VEGFB	7423	vascular endothelial growth factor B	11	64002055	64006736	11q13.1	0.336263	0.0086176	1	MEN1	564249	0	1		LC:HOP_62 11:62698979-64133652	FALSE	FALSE
	DNAJC4	3338	DnaJ (Hsp40) homolog, subfamily C, member 4	11	63997752	64001753	11q13.1	0.320039	0.0126739	1	MEN1	569232	0	1		LC:HOP_62 11:62698979-64133652	FALSE	FALSE
	FKBP2	2286	FK506 binding protein 2, 13kDa	11	64008412	64011607	11q13.1	0.444184	0.000377693	1	MEN1	559378	0	1		LC:HOP_62 11:62698979-64133652	FALSE	FALSE
	PPP1R14B	26472	protein phosphatase 1, regulatory (inhibitor) subunit 14B	11	64011950	64014413	11q13.1	0.339913	0.00843881	1	MEN1	556572	0	1		LC:HOP_62 11:62698979-64133652	FALSE	FALSE
	RPS6KA4	8986	ribosomal protein S6 kinase, 90kDa, polypeptide 4	11	64126624	64139687	11q13.1	0.530206	1.31846e-05	0.194803	MEN1	431298	0	1		LC:HOP_62 11:62698979-64133652	FALSE	FALSE
	CCDC88B	283234	coiled-coil domain containing 88B	11	64107689	64125006	11q13.1	0.161638	0.217265	1	MEN1	445979	0	1		LC:HOP_62 11:62698979-64133652	FALSE	FALSE
	EIF1AD	84285	eukaryotic translation initiation factor 1A domain containing	11	65764015	65769637	11q13.1	0.611054	2.15688e-07	0.0035142	MEN1	1185249	0	1		CNS:SF_295 11:65763081-68599682	FALSE	FALSE
	CST6	1474	cystatin E/M	11	65779461	65780976	11q13.1	0.156399	0.232738	1	MEN1	1200695	0	1		CNS:SF_295 11:65763081-68599682	FALSE	FALSE
	CATSPER1	117144	cation channel, sperm associated 1	11	65784222	65793988	11q13.1	0.153962	0.244321	1	MEN1	1205456	0	1		CNS:SF_295 11:65763081-68599682	FALSE	FALSE
	BANF1	8815	barrier to autointegration factor 1	11	65769549	65771617	11q13.1	0.793826	3.8627e-14	7.08458e-10	MEN1	1190783	0	1		CNS:SF_295 11:65763081-68599682	FALSE	FALSE
	GAL3ST3	89792	galactose-3-O-sulfotransferase 3	11	65808235	65816651	11q13.1	0.378839	0.00308837	1	MEN1	1229469	0	1		CNS:SF_295 11:65763081-68599682	FALSE	FALSE
	SF3B2	10992	splicing factor 3b, subunit 2, 145kDa	11	65819815	65836382	11q13.1	0.675683	4.32594e-09	7.46009e-05	MEN1	1241049	0	1		CNS:SF_295 11:65763081-68599682	FALSE	FALSE
	KLC2	64837	kinesin light chain 2	11	66024764	66035332	11q13.2	0.492528	6.40232e-05	0.899078	MEN1	1445998	0	1		CNS:SF_295 11:65763081-68599682	FALSE	FALSE
	RAB1B	81876	RAB1B, member RAS oncogene family	11	66036055	66044963	11q13.2	0.736159	2.05337e-11	3.69092e-07	MEN1	1457289	0	1		CNS:SF_295 11:65763081-68599682	FALSE	FALSE
	YIF1A	10897	Yip1 interacting factor homolog A (S. cerevisiae)	11	66052050	66056638	11q13.2	0.620791	1.21361e-07	0.00199662	MEN1	1473284	0	1		CNS:SF_295 11:65763081-68599682	FALSE	FALSE
	CNIH2	254263	cornichon homolog 2 (Drosophila)	11	66045671	66051685	11q13.2	0.103763	0.430129	1	MEN1	1466905	0	1		CNS:SF_295 11:65763081-68599682	FALSE	FALSE
	BRMS1	25855	breast cancer metastasis suppressor 1	11	66104803	66112582	11q13.2	0.532929	1.16747e-05	0.173019	MEN1	1526037	0	1		CNS:SF_295 11:65763081-68599682	FALSE	FALSE
	CD248	57124	CD248 molecule, endosialin	11	66081957	66084515	11q13.2	0.0624389	0.635544	1	MEN1	1503191	0	1		CNS:SF_295 11:65763081-68599682	FALSE	FALSE
	SLC29A2	3177	solute carrier family 29 (nucleoside transporters), member 2	11	66129991	66139291	11q13.2	0.31635	0.0137977	1	MEN1	1551225	0	1		CNS:SF_295 11:65763081-68599682	FALSE	FALSE
	B3GNT1	11041	UDP-GlcNAc:betaGal beta-1,3-N-acetylglucosaminyltransferase 1	11	66112842	66115161	11q13.2	0.309648	0.0160593	1	MEN1	1534076	0	1		CNS:SF_295 11:65763081-68599682	FALSE	FALSE
	RIN1	9610	Ras and Rab interactor 1	11	66099541	66104000	11q13.2	0.155267	0.236177	1	MEN1	1520775	0	1		CNS:SF_295 11:65763081-68599682	FALSE	FALSE
	DPP3	10072	dipeptidyl-peptidase 3	11	66247483	66277130	11q13.2	0.617669	1.4625e-07	0.00239982	MEN1	1668717	0	1		CNS:SF_295 11:65763081-68599682	FALSE	FALSE
	BBS1	582	Bardet-Biedl syndrome 1	11	66278118	66301084	11q13.2	0.552687	4.67603e-06	0.071272	MEN1	1699352	0	1		CNS:SF_295 11:65763081-68599682	FALSE	FALSE
	ZDHHC24	254359	zinc finger, DHHC-type containing 24	11	66306734	66313671	11q13.2	0.232934	0.0732819	1	MEN1	1727968	0	1		CNS:SF_295 11:65763081-68599682	FALSE	FALSE
	MRPL11	65003	mitochondrial ribosomal protein L11	11	66202549	66206310	11q13.2	0.705247	3.15568e-10	5.5723e-06	MEN1	1623783	0	1		CNS:SF_295 11:65763081-68599682	FALSE	FALSE
	PELI3	246330	pellino homolog 3 (Drosophila)	11	66233797	66244808	11q13.2	0.314224	0.0144833	1	MEN1	1655031	0	1		CNS:SF_295 11:65763081-68599682	FALSE	FALSE
	RBM4	5936	RNA binding motif protein 4	11	66406087	66435858	11q13.2	0.66743	5.74582e-09	9.88454e-05	MEN1	1827321	0	1		CNS:SF_295 11:65763081-68599682	FALSE	FALSE
	CCS	9973	copper chaperone for superoxide dismutase	11	66360689	66373490	11q13.2	0.541893	9.31241e-06	0.139033	MEN1	1781923	0	1		CNS:SF_295 11:65763081-68599682	FALSE	FALSE
	RBM14	10432	RNA binding motif protein 14	11	66384052	66397397	11q13.2	0.55094	6.13878e-06	0.0929043	MEN1	1805286	0	1		CNS:SF_295 11:65763081-68599682	FALSE	FALSE
	RBM4B	83759	RNA binding motif protein 4B	11	66432469	66445275	11q13.2	0.583826	1.21217e-06	0.0190432	MEN1	1853703	0	1		CNS:SF_295 11:65763081-68599682	FALSE	FALSE
	CCDC87	55231	coiled-coil domain containing 87	11	66357639	66360554	11q13.2	0.214285	0.103158	1	MEN1	1778873	0	1		CNS:SF_295 11:65763081-68599682	FALSE	FALSE
	CTSF	8722	cathepsin F	11	66330934	66336047	11q13.2	0.0278309	0.832822	1	MEN1	1752168	0	1		CNS:SF_295 11:65763081-68599682	FALSE	FALSE
	RCE1	9986	RCE1 homolog, prenyl protein peptidase (S. cerevisiae)	11	66610882	66614003	11q13.2	0.614523	1.76124e-07	0.00287963	MEN1	2032116	0	1		CNS:SF_295 11:65763081-68599682	FALSE	FALSE
	LRFN4	78999	leucine rich repeat and fibronectin type III domain containing 4	11	66624875	66627946	11q13.2	0.380536	0.00270566	1	MEN1	2046109	0	1		CNS:SF_295 11:65763081-68599682	FALSE	FALSE
	CABP4	57010	calcium binding protein 4	11	67222817	67229245	11q13.2	0.0459869	0.72945	1	MEN1	2644051	0	1		CNS:SF_295 11:65763081-68599682	FALSE	FALSE
	CARNS1	57571	carnosine synthase 1	11	67183148	67193078	11q13.2	0.202802	0.123443	1	MEN1	2604382	0	1		CNS:SF_295 11:65763081-68599682	FALSE	FALSE
	RPS6KB2	6199	ribosomal protein S6 kinase, 70kDa, polypeptide 2	11	67195934	67202879	11q13.2	0.748363	9.53771e-12	1.72165e-07	MEN1	2617168	0	1		CNS:SF_295 11:65763081-68599682	FALSE	FALSE
	CORO1B	57175	coronin, actin binding protein, 1B	11	67205517	67211292	11q13.2	0.446689	0.000346692	1	MEN1	2626751	0	1		CNS:SF_295 11:65763081-68599682	FALSE	FALSE
	TMEM134	80194	transmembrane protein 134	11	67231818	67236748	11q13.2	0.662868	7.92848e-09	0.000135736	MEN1	2653052	0	1		CNS:SF_295 11:65763081-68599682	FALSE	FALSE
	PTPRCAP	5790	protein tyrosine phosphatase, receptor type, C-associated protein	11	67202980	67205153	11q13.2	0.0173249	0.895471	1	MEN1	2624214	0	1		CNS:SF_295 11:65763081-68599682	FALSE	FALSE
	PITPNM1	9600	phosphatidylinositol transfer protein, membrane-associated 1	11	67259238	67272843	11q13.2	0.496331	5.50394e-05	0.777211	MEN1	2680472	0	1		CNS:SF_295 11:65763081-68599682	FALSE	FALSE
	CABP2	51475	calcium binding protein 2	11	67286417	67290899	11q13.2	0.111114	0.402132	1	MEN1	2707651	0	1		CNS:SF_295 11:65763081-68599682	FALSE	FALSE
	AIP	9049	aryl hydrocarbon receptor interacting protein	11	67250504	67258579	11q13.2	0.418716	0.00107114	1	MEN1	2671738	0	1		CNS:SF_295 11:65763081-68599682	FALSE	FALSE
	GSTP1	2950	glutathione S-transferase pi 1	11	67351065	67354124	11q13.2	0.103408	0.431716	1	MEN1	2772299	0	1		CNS:SF_295 11:65763081-68599682	FALSE	FALSE
	CDK2AP2	10263	cyclin-dependent kinase 2 associated protein 2	11	67273960	67276199	11q13.2	0.557239	4.55972e-06	0.0695494	MEN1	2695194	0	1		CNS:SF_295 11:65763081-68599682	FALSE	FALSE
	DOC2GP	390213	double C2-like domains, gamma, pseudogene	11	67380994	67383135	11q13.2	0.101883	0.442587	1	MEN1	2802228	0	1		CNS:SF_295 11:65763081-68599682	FALSE	FALSE
	NUDT8	254552	nudix (nucleoside diphosphate linked moiety X)-type motif 8	11	67395408	67397408	11q13.2	0.296365	0.0214902	1	MEN1	2816642	0	1		CNS:SF_295 11:65763081-68599682	FALSE	FALSE
	NDUFV1	4723	NADH dehydrogenase (ubiquinone) flavoprotein 1, 51kDa	11	67374322	67380012	11q13.2	0.754247	3.45634e-12	6.266e-08	MEN1	2795556	0	1		CNS:SF_295 11:65763081-68599682	FALSE	FALSE
	ALDH3B2	222	aldehyde dehydrogenase 3 family, member B2	11	67429632	67448685	11q13.2	0.123223	0.348253	1	MEN1	2850866	1	1	RE:TK_10 11:67421267-70356321	CNS:SF_295 11:65763081-68599682	FALSE	FALSE
	ACY3	91703	aspartoacylase (aminocyclase) 3	11	67410025	67418130	11q13.2	-0.0286097	0.828214	1	MEN1	2831259	0	1		CNS:SF_295 11:65763081-68599682	FALSE	FALSE
	TBX10	347853	T-box 10	11	67398773	67407031	11q13.2	0.462056	0.000229611	1	MEN1	2820007	0	1		CNS:SF_295 11:65763081-68599682	FALSE	FALSE
	TCIRG1	10312	T-cell, immune regulator 1, ATPase, H+ transporting, lysosomal V0 subunit A3	11	67806461	67818366	11q13.2	0.405271	0.00131715	1	MEN1	3227695	2	1	ME:SK_MEL_28 11:67553656-68578406,RE:TK_10 11:67421267-70356321	CNS:SF_295 11:65763081-68599682	FALSE	FALSE
	CHKA	1119	choline kinase alpha	11	67820325	67888858	11q13.2	0.575707	1.49171e-06	0.0233393	MEN1	3241559	2	1	ME:SK_MEL_28 11:67553656-68578406,RE:TK_10 11:67421267-70356321	CNS:SF_295 11:65763081-68599682	FALSE	FALSE
	ALDH3B1	221	aldehyde dehydrogenase 3 family, member B1	11	67776047	67796743	11q13.2	0.236139	0.0693041	1	MEN1	3197281	2	1	ME:SK_MEL_28 11:67553656-68578406,RE:TK_10 11:67421267-70356321	CNS:SF_295 11:65763081-68599682	FALSE	FALSE
	NDUFS8	4728	NADH dehydrogenase (ubiquinone) Fe-S protein 8, 23kDa (NADH-coenzyme Q reductase)	11	67798083	67804114	11q13.2	0.869338	2.10921e-19	3.90014e-15	MEN1	3219317	2	1	ME:SK_MEL_28 11:67553656-68578406,RE:TK_10 11:67421267-70356321	CNS:SF_295 11:65763081-68599682	FALSE	FALSE
	SUV420H1	51111	suppressor of variegation 4-20 homolog 1 (Drosophila)	11	67923506	67980784	11q13.2	0.814253	2.54066e-15	4.67887e-11	MEN1	3344740	2	1	ME:SK_MEL_28 11:67553656-68578406,RE:TK_10 11:67421267-70356321	CNS:SF_295 11:65763081-68599682	FALSE	FALSE
	C11orf24	53838	chromosome 11 open reading frame 24	11	68028802	68039469	11q13.2	0.361055	0.0045944	1	MEN1	3450036	2	1	ME:SK_MEL_28 11:67553656-68578406,RE:TK_10 11:67421267-70356321	CNS:SF_295 11:65763081-68599682	FALSE	FALSE
	GAL	51083	galanin prepropeptide	11	68451982	68458643	11q13.3	0.200496	0.124536	1	MEN1	3873216	2	1	ME:SK_MEL_28 11:67553656-68578406,RE:TK_10 11:67421267-70356321	CNS:SF_295 11:65763081-68599682	FALSE	FALSE
	MTL5	9633	metallothionein-like 5, testis-specific (tesmin)	11	68474907	68518988	11q13.3	0.5086	3.33796e-05	0.479298	MEN1	3896141	2	1	ME:SK_MEL_28 11:67553656-68578406,RE:TK_10 11:67421267-70356321	CNS:SF_295 11:65763081-68599682	FALSE	FALSE
	MRPL21	219927	mitochondrial ribosomal protein L21	11	68658745	68671303	11q13.3	0.633723	7.14498e-08	0.00118578	MEN1	4079979	3	1	CNS:SF_295 11:68619376-69645892,ME:SK_MEL_5 11:68544562-72066913,RE:TK_10 11:67421267-70356321	ME:SK_MEL_28 11:68595388-68831059	FALSE	FALSE
	MRGPRF	116535	MAS-related GPR, member F	11	68771861	68780850	11q13.3	0.0746508	0.570802	1	MEN1	4193095	3	1	CNS:SF_295 11:68619376-69645892,ME:SK_MEL_5 11:68544562-72066913,RE:TK_10 11:67421267-70356321	ME:SK_MEL_28 11:68595388-68831059	FALSE	FALSE
	MRGPRD	116512	MAS-related GPR, member D	11	68747489	68748455	11q13.3	-0.106653	0.421404	1	MEN1	4168723	3	1	CNS:SF_295 11:68619376-69645892,ME:SK_MEL_5 11:68544562-72066913,RE:TK_10 11:67421267-70356321	ME:SK_MEL_28 11:68595388-68831059	FALSE	FALSE
	TPCN2	219931	two pore segment channel 2	11	68816349	68858072	11q13.3	0.478242	0.00011122	1	MEN1	4237583	3	1	CNS:SF_295 11:68619376-69645892,ME:SK_MEL_5 11:68544562-72066913,RE:TK_10 11:67421267-70356321	ME:SK_MEL_28 11:68595388-68831059	FALSE	FALSE
	FADD	8772	Fas (TNFRSF6)-associated via death domain	11	70049268	70053508	11q13.3	0.80168	1.40838e-14	2.58593e-10	MEN1	5470502	2	1	ME:SK_MEL_5 11:68544562-72066913,RE:TK_10 11:67421267-70356321	ME:SK_MEL_28 11:69663418-70864179	FALSE	FALSE
	ARHGEF17	9828	Rho guanine nucleotide exchange factor (GEF) 17	11	73019662	73080425	11q13.4	0.351906	0.00582797	1	MEN1	8440896	1	1	OV:OVCAR_3 11:72493282-73214167	ME:SK_MEL_2 11:70803936-74754489	FALSE	FALSE
	RELT	84957	RELT tumor necrosis factor receptor	11	73087404	73108519	11q13.4	0.430413	0.000597792	1	MEN1	8508638	2	1	LC:HOP_62 11:73022691-73449177,OV:OVCAR_3 11:72493282-73214167	ME:SK_MEL_2 11:70803936-74754489	FALSE	FALSE
	OR2AT4	341152	olfactory receptor, family 2, subfamily AT, member 4	11	74799795	74800758	11q13.4	-0.355954	0.00565939	1	MEN1	10221029	1	1	ME:SK_MEL_2 11:74790843-75257655	OV:OVCAR_3 11:73255955-75102625	FALSE	FALSE
	SLCO2B1	11309	solute carrier organic anion transporter family, member 2B1	11	74862031	74917445	11q13.4	-0.315707	0.014002	1	MEN1	10283265	1	1	ME:SK_MEL_2 11:74790843-75257655	OV:OVCAR_3 11:73255955-75102625	FALSE	FALSE
	C11orf82	220042	chromosome 11 open reading frame 82	11	82612736	82645699	11q14.1	0.556529	3.88709e-06	0.059523	MEN1	18033970	2	1	LC:NCI_H322M 11:81144725-82971840,OV:NCI_ADR_RES 11:81856929-83602399	LC:EKVX 11:82258473-83807445	FALSE	FALSE
	PCF11	51585	PCF11, cleavage and polyadenylation factor subunit, homolog (S. cerevisiae)	11	82868136	82896835	11q14.1	0.292124	0.0247645	1	MEN1	18289370	2	1	LC:NCI_H322M 11:81144725-82971840,OV:NCI_ADR_RES 11:81856929-83602399	LC:EKVX 11:82258473-83807445	FALSE	FALSE
	ANKRD42	338699	ankyrin repeat domain 42	11	82905290	82960013	11q14.1	0.432976	0.000549637	1	MEN1	18326524	2	1	LC:NCI_H322M 11:81144725-82971840,OV:NCI_ADR_RES 11:81856929-83602399	LC:EKVX 11:82258473-83807445	FALSE	FALSE
	C11orf73	51501	chromosome 11 open reading frame 73	11	86013252	86056985	11q14.2	0.668727	7.10299e-09	0.000121788	MEN1	21434486	1	1	LC:NCI_H322M 11:85197684-86543625	PR:PC_3 11:85659850-86572604	FALSE	FALSE
	PRSS23	11098	protease, serine, 23	11	86511490	86522273	11q14.2	0.131631	0.316087	1	ATM	21571285	1	1	LC:NCI_H322M 11:85197684-86543625	PR:PC_3 11:85659850-86572604	FALSE	FALSE
	FZD4	8322	frizzled homolog 4 (Drosophila)	11	86656716	86666440	11q14.2	0.333786	0.00915216	1	ATM	21427118	0	1		LC:NCI_H322M 11:86552571-86730814	FALSE	FALSE
	CCDC67	159989	coiled-coil domain containing 67	11	93063882	93171636	11q21	0.0593513	0.652379	1	ATM	14921922	0	1		LC:NCI_H322M 11:93103561-93481602	FALSE	FALSE
	C11orf54	28970	chromosome 11 open reading frame 54	11	93474792	93496247	11q21	0.630634	6.64987e-08	0.00110481	ATM	14597311	0	1		LC:NCI_H322M 11:93103561-93481602	FALSE	FALSE
	TAF1D	79101	TATA box binding protein (TBP)-associated factor, RNA polymerase I, D, 41kDa	11	93469095	93474703	11q21	0.783099	1.43134e-13	2.62064e-09	ATM	14618855	0	1		LC:NCI_H322M 11:93103561-93481602	FALSE	FALSE
	TMEM133	83935	transmembrane protein 133	11	100862810	100864666	11q22.1	0.675702	3.15832e-09	5.46706e-05	ATM	7228892	0	1		LC:EKVX 11:99451993-100885639	FALSE	FALSE
	DDI1	414301	DNA-damage inducible 1 homolog 1 (S. cerevisiae)	11	103907307	103909922	11q22.3	0.0690146	0.60349	1	ATM	4183636	0	1		CNS:SF_268 11:103368043-105837661	FALSE	FALSE
	CASP12	100506742	caspase 12 (gene/pseudogene)	11	104756444	104769397	11q22.3	-0.0113007	0.932303	1	ATM	3324161	0	1		CNS:SF_268 11:103368043-105837661	FALSE	FALSE
	CASP4	837	caspase 4, apoptosis-related cysteine peptidase	11	104813593	104839325	11q22.3	0.334753	0.00894007	1	ATM	3254233	0	1		CNS:SF_268 11:103368043-105837661	FALSE	FALSE
	LOC643733	643733	caspase 4, apoptosis-related cysteine peptidase pseudogene	11	104772275	104788902	11q22.3	0.262172	0.0448633	1	ATM	3304656	0	1		CNS:SF_268 11:103368043-105837661	FALSE	FALSE
	CARD17	440068	caspase recruitment domain family, member 17	11	104963195	104972158	11q22.3	0.188538	0.152699	1	ATM	3121400	0	1		CNS:SF_268 11:103368043-105837661	FALSE	FALSE
	CASP5	838	caspase 5, apoptosis-related cysteine peptidase	11	104864966	104893895	11q22.3	0.238447	0.0665482	1	ATM	3199663	0	1		CNS:SF_268 11:103368043-105837661	FALSE	FALSE
	CASP1	834	caspase 1, apoptosis-related cysteine peptidase (interleukin 1, beta, convertase)	11	104896236	104905884	11q22.3	-0.137164	0.295992	1	ATM	3187674	0	1		CNS:SF_268 11:103368043-105837661	FALSE	FALSE
	CARD16	114769	caspase recruitment domain family, member 16	11	104912052	104916051	11q22.3	-0.313747	0.014641	1	ATM	3177507	0	1		CNS:SF_268 11:103368043-105837661	FALSE	FALSE
	CARD18	59082	caspase recruitment domain family, member 18	11	105008447	105010461	11q22.3	0.0698619	0.595826	1	ATM	3083097	0	1		CNS:SF_268 11:103368043-105837661	FALSE	FALSE
	OR10G4	390264	olfactory receptor, family 10, subfamily G, member 4	11	123886281	123887217	11q24.1	0.0173413	0.896281	1	ATM	15646455	1	1	LC:HOP_62 11:122271442-126490951	OV:NCI_ADR_RES 11:123869044-123904087	FALSE	FALSE
	SYT10	341359	synaptotagmin X	12	33528347	33592754	12p11.1	0.0152743	0.908588	1	ING4	26756039	0	1		PR:PC_3 12:31408133-34135351	FALSE	FALSE
	FAM60A	58516	family with sequence similarity 60, member A	12	31433519	31479159	12p11.21	0.459307	0.00025296	1	ING4	24661211	0	1		PR:PC_3 12:31408133-34135351	FALSE	FALSE
	BICD1	636	bicaudal D homolog 1 (Drosophila)	12	32260184	32531141	12p11.21	0.319388	0.0128663	1	ING4	25487876	0	1		PR:PC_3 12:31408133-34135351	FALSE	FALSE
	PPFIA2	8499	protein tyrosine phosphatase, receptor type, f polypeptide (PTPRF), interacting protein (liprin), alpha 2	12	81652044	82153109	12q21.31	-0.0582638	0.658351	1	MDM2	12412724	0	1		ME:UACC_257 12:78683757-82762885	FALSE	FALSE
	SYT1	6857	synaptotagmin I	12	79257772	79845788	12q21.2	0.2065	0.113419	1	MDM2	10018452	0	1		ME:UACC_257 12:78683757-82762885	FALSE	FALSE
	OTOGL	283310	otogelin-like	12	80603232	80772870	12q21.31	0.0749086	0.572845	1	MDM2	11363912	0	1		ME:UACC_257 12:78683757-82762885	FALSE	FALSE
	C12orf42	374470	chromosome 12 open reading frame 42	12	103695732	103889749	12q23.2:12q23.3	0.0536356	0.686611	1	HNF1A	17526799	0	1		ME:UACC_257 12:103493258-104076136	FALSE	FALSE
	C12orf65	91574	chromosome 12 open reading frame 65	12	123717843	123742506	12q24.31	0.439037	0.000449428	1	HNF1A	2277529	0	1		PR:PC_3 12:123446915-124115811	FALSE	FALSE
	SRRM4	84530	serine/arginine repetitive matrix 4	12	119419299	119600856	12q24.23	0.0775792	0.559201	1	HNF1A	1815692	0	1		ME:UACC_257 12:119416099-120533683	FALSE	FALSE
	CCDC91	55297	coiled-coil domain containing 91	12	28410132	28703099	12p11.22	0.627895	7.87808e-08	0.00130548	ING4	21637824	0	1		PR:PC_3 12:28238622-28782396	FALSE	FALSE
	IPO8	10526	importin 8	12	30781914	30848929	12p11.21	0.615776	1.63598e-07	0.00267728	ING4	24009606	0	1		PR:PC_3 12:30121962-31258518	FALSE	FALSE
	DENND5B	160518	DENN/MADD domain containing 5B	12	31535156	31743952	12p11.21	0.235963	0.0695185	1	ING4	24762848	0	1		PR:PC_3 12:31408133-34135351	FALSE	FALSE
	AMN1	196394	antagonist of mitotic exit network 1 homolog (S. cerevisiae)	12	31824070	31882108	12p11.21	0.493902	6.0632e-05	0.852971	ING4	25051762	0	1		PR:PC_3 12:31408133-34135351	FALSE	FALSE
	PKP2	5318	plakophilin 2	12	32943679	33049780	12p11.21	0.421638	0.000793065	1	ING4	26171371	0	1		PR:PC_3 12:31408133-34135351	FALSE	FALSE
	FGD4	121512	FYVE, RhoGEF and PH domain containing 4	12	32655040	32798984	12p11.21	0.408896	0.00117974	1	ING4	25882732	0	1		PR:PC_3 12:31408133-34135351	FALSE	FALSE
	KIF21A	55605	kinesin family member 21A	12	39687029	39837192	12q12	0.457901	0.000234393	1	MDM2	29364778	0	1		LC:NCI_H322M 12:38963260-41150826	FALSE	FALSE
	CPNE8	144402	copine VIII	12	39046001	39299420	12q12	0.0727556	0.580647	1	MDM2	29902550	0	1		LC:NCI_H322M 12:38963260-41150826	FALSE	FALSE
	SLC2A13	114134	solute carrier family 2 (facilitated glucose transporter), member 13	12	40148822	40499661	12q12	0.189786	0.146394	1	MDM2	28702309	0	1		LC:NCI_H322M 12:38963260-41150826	FALSE	FALSE
	ABCD2	225	ATP-binding cassette, sub-family D (ALD), member 2	12	39945021	40013843	12q12	0.0531857	0.689105	1	MDM2	29188127	0	1		LC:NCI_H322M 12:38963260-41150826	FALSE	FALSE
	LRRK2	120892	leucine-rich repeat kinase 2	12	40618812	40763086	12q12	0.224557	0.0845411	1	MDM2	28438884	0	1		LC:NCI_H322M 12:38963260-41150826	FALSE	FALSE
	C12orf40	283461	chromosome 12 open reading frame 40	12	40019971	40115720	12q12	-0.0480962	0.715167	1	MDM2	29086250	0	1		LC:NCI_H322M 12:38963260-41150826	FALSE	FALSE
	CNTN1	1272	contactin 1	12	41086243	41466213	12q12	0.119152	0.364529	1	MDM2	27735757	0	1		LC:NCI_H322M 12:38963260-41150826	FALSE	FALSE
	TFCP2	7024	transcription factor CP2	12	51487538	51566926	12q13.12:12q13.13	0.280268	0.0300861	1	MDM2	17635044	1	1	LC:NCI_H522 12:50294563-51595940	PR:PC_3 12:51504800-51667964	FALSE	FALSE
	SMAGP	57228	small cell adhesion glycoprotein	12	51639132	51664202	12q13.13	0.177242	0.179288	1	MDM2	17537768	0	1		PR:PC_3 12:51504800-51667964	FALSE	FALSE
	CPM	1368	carboxypeptidase M	12	69244955	69357020	12q15	0.00448943	0.972842	1	MDM2	5635	0	1		ME:UACC_257 12:69314205-69810026	FALSE	FALSE
	GLIPR1	11010	GLI pathogenesis-related 1	12	75874512	75895716	12q21.2	-0.123662	0.346524	1	MDM2	6635192	1	1	ME:UACC_257 12:75824462-75908640	RE:UO_31 12:75884403-77272580	FALSE	FALSE
	NAV3	89795	neuron navigator 3	12	78225068	78606790	12q21.2	0.265095	0.0406578	1	MDM2	8985748	0	1		ME:UACC_257 12:75961212-78561703	FALSE	FALSE
	PTPRQ	374462	protein tyrosine phosphatase, receptor type, Q	12	80838125	81073968	12q21.31	0.147656	0.264409	1	MDM2	11598805	0	1		ME:UACC_257 12:78683757-82762885	FALSE	FALSE
	ACSS3	79611	acyl-CoA synthetase short-chain family member 3	12	81471808	81649582	12q21.31	0.174129	0.183315	1	MDM2	12232488	0	1		ME:UACC_257 12:78683757-82762885	FALSE	FALSE
	LIN7A	8825	lin-7 homolog A (C. elegans)	12	81191170	81331694	12q21.31	0.244154	0.0601098	1	MDM2	11951850	0	1		ME:UACC_257 12:78683757-82762885	FALSE	FALSE
	TMTC2	160335	transmembrane and tetratricopeptide repeat containing 2	12	83080933	83528067	12q21.31	0.128085	0.329413	1	MDM2	13841613	0	1		ME:UACC_257 12:83503458-84723364	FALSE	FALSE
	EEA1	8411	early endosome antigen 1	12	93166284	93323107	12q22	0.407614	0.00122677	1	MDM2	23926964	0	1		OV:IGROV1 12:93202409-94311918	FALSE	FALSE
	CRADD	8738	CASP2 and RIPK1 domain containing adaptor with death domain	12	94071150	94244531	12q22	0.327742	0.0105789	1	MDM2	24831830	0	1		OV:IGROV1 12:93202409-94311918	FALSE	FALSE
	LOC643339	643339	hypothetical protein LOC643339	12	93397533	93771512	12q22	0.117046	0.377315	1	MDM2	24158213	0	1		OV:IGROV1 12:93202409-94311918	FALSE	FALSE
	VEZT	55591	vezatin, adherens junctions transmembrane protein	12	95611521	95696566	12q22	0.609702	2.33263e-07	0.00379449	HNF1A	25719982	0	1		RE:UO_31 12:95534865-95697007	FALSE	FALSE
	FGD6	55785	FYVE, RhoGEF and PH domain containing 6	12	95470524	95611240	12q22	0.355699	0.00528517	1	HNF1A	25805308	0	1		RE:UO_31 12:95534865-95697007	FALSE	FALSE
	APAF1	317	apoptotic peptidase activating factor 1	12	99039077	99129211	12q23.1	0.461788	0.000204	1	HNF1A	22287337	0	1		OV:SK_OV_3 12:99032116-99485382	FALSE	FALSE
	UHRF1BP1L	23074	UHRF1 binding protein 1-like	12	100430862	100536642	12q23.1	0.489088	7.32947e-05	1	HNF1A	20879906	0	1		PR:RC01 12:100274127-100565709	FALSE	FALSE
	STAB2	55576	stabilin 2	12	103981068	104160502	12q23.3	-0.0551774	0.678088	1	HNF1A	17256046	0	1		ME:UACC_257 12:103493258-104076136	FALSE	FALSE
	CCDC64	92558	coiled-coil domain containing 64	12	120427647	120532299	12q24.23	0.356705	0.00555182	1	HNF1A	884249	0	1		ME:UACC_257 12:119416099-120533683	FALSE	FALSE
	TMEM233	387890	transmembrane protein 233	12	120031263	120079363	12q24.23	0.203325	0.119199	1	HNF1A	1337185	0	1		ME:UACC_257 12:119416099-120533683	FALSE	FALSE
	CIT	11113	citron (rho-interacting, serine/threonine kinase 21)	12	120123594	120315095	12q24.23	0.25664	0.0477718	1	HNF1A	1101453	0	1		ME:UACC_257 12:119416099-120533683	FALSE	FALSE
	CCDC60	160777	coiled-coil domain containing 60	12	119772516	119978852	12q24.23	-0.0705747	0.595309	1	HNF1A	1437696	0	1		ME:UACC_257 12:119416099-120533683	FALSE	FALSE
	PITPNM2	57605	phosphatidylinositol transfer protein, membrane-associated 2	12	123468026	123594975	12q24.31	0.183498	0.160492	1	HNF1A	2027712	0	1		PR:PC_3 12:123446915-124115811	FALSE	FALSE
	RILPL1	353116	Rab interacting lysosomal protein-like 1	12	123955908	124018265	12q24.31	0.0791618	0.551189	1	HNF1A	2515594	0	1		PR:PC_3 12:123446915-124115811	FALSE	FALSE
	RIMBP2	23504	RIMS binding protein 2	12	130880680	131002410	12q24.33	-0.0236061	0.857914	1	HNF1A	9440366	0	1		PR:PC_3 12:130696842-131205593	FALSE	FALSE
	CAPRIN2	65981	caprin family member 2	12	30862485	30907448	12p11.21	0.422551	0.000770363	1	ING4	24090177	0	1		PR:PC_3 12:30121962-31258518	FALSE	FALSE
	LOC100287314	100287314	hypothetical LOC100287314	12	30948614	30955645	12p11.21	0.327819	0.011257	1	ING4	24176306	0	1		PR:PC_3 12:30121962-31258518	FALSE	FALSE
	TSPAN11	441631	tetraspanin 11	12	31079837	31149537	12p11.21	-0.0943035	0.477427	1	ING4	24307529	0	1		PR:PC_3 12:30121962-31258518	FALSE	FALSE
	DDX11	1663	DEAD/H (Asp-Glu-Ala-Asp/His) box polypeptide 11	12	31226778	31257725	12p11.21	0.362288	0.00444726	1	ING4	24454470	0	1		PR:PC_3 12:30121962-31258518	FALSE	FALSE
	FLJ13224	79857	hypothetical LOC79857	12	31477249	31478879	12p11.21	-0.0756467	0.572498	1	ING4	24704941	0	1		PR:PC_3 12:31408133-34135351	FALSE	FALSE
	H3F3C	440093	H3 histone, family 3C	12	31944118	31945175	12p11.21	0.276623	0.0323884	1	ING4	25171810	0	1		PR:PC_3 12:31408133-34135351	FALSE	FALSE
	DNM1L	10059	dynamin 1-like	12	32832136	32898584	12p11.21	0.78266	1.50786e-13	2.76059e-09	ING4	26059828	0	1		PR:PC_3 12:31408133-34135351	FALSE	FALSE
	YARS2	51067	tyrosyl-tRNA synthetase 2, mitochondrial	12	32899477	32908887	12p11.21	0.712993	2.36658e-10	4.18719e-06	ING4	26127169	0	1		PR:PC_3 12:31408133-34135351	FALSE	FALSE
	DAZAP2	9802	DAZ associated protein 2	12	51632507	51640501	12q13.13	0.764585	1.16343e-12	2.11756e-08	MDM2	17561469	0	1		PR:PC_3 12:51504800-51667964	FALSE	FALSE
	CPSF6	11052	cleavage and polyadenylation specific factor 6, 68kDa	12	69633316	69668138	12q15	0.528422	1.42701e-05	0.210298	MDM2	393996	0	1		ME:UACC_257 12:69314205-69810026	FALSE	FALSE
	YEATS4	8089	YEATS domain containing 4	12	69753531	69784576	12q15	0.449308	0.000316782	1	MDM2	514211	0	1		ME:UACC_257 12:69314205-69810026	FALSE	FALSE
	LYZ	4069	lysozyme	12	69742133	69748013	12q15	0.00718327	0.956559	1	MDM2	502813	0	1		ME:UACC_257 12:69314205-69810026	FALSE	FALSE
	KRR1	11103	KRR1, small subunit (SSU) processome component, homolog (yeast)	12	75891418	75905418	12q21.2	0.5696	2.03693e-06	0.0316407	MDM2	6652098	1	1	ME:UACC_257 12:75824462-75908640	RE:UO_31 12:75884403-77272580	FALSE	FALSE
	E2F7	144455	E2F transcription factor 7	12	77415025	77459360	12q21.2	0.117216	0.372431	1	MDM2	8175705	0	1		ME:UACC_257 12:75961212-78561703	FALSE	FALSE
	MYF6	4618	myogenic factor 6 (herculin)	12	81101407	81103256	12q21.31	0.107853	0.416168	1	MDM2	11862087	0	1		ME:UACC_257 12:78683757-82762885	FALSE	FALSE
	MYF5	4617	myogenic factor 5	12	81110707	81113447	12q21.31	0.360535	0.00503039	1	MDM2	11871387	0	1		ME:UACC_257 12:78683757-82762885	FALSE	FALSE
	CCDC59	29080	coiled-coil domain containing 59	12	82746082	82752584	12q21.31	0.535101	1.05873e-05	0.157433	MDM2	13506762	0	1		ME:UACC_257 12:78683757-82762885	FALSE	FALSE
	UBE2N	7334	ubiquitin-conjugating enzyme E2N (UBC13 homolog, yeast)	12	93802087	93836026	12q22	0.611498	2.10202e-07	0.00342651	MDM2	24562767	0	1		OV:IGROV1 12:93202409-94311918	FALSE	FALSE
	NUDT4	11163	nudix (nucleoside diphosphate linked moiety X)-type motif 4	12	93771700	93797024	12q22	0.19733	0.130721	1	MDM2	24532380	0	1		OV:IGROV1 12:93202409-94311918	FALSE	FALSE
	SOCS2	8835	suppressor of cytokine signaling 2	12	93963597	93970521	12q22	0.172895	0.186489	1	MDM2	24724277	0	1		OV:IGROV1 12:93202409-94311918	FALSE	FALSE
	MRPL42	28977	mitochondrial ribosomal protein L42	12	93861265	93897548	12q22	0.644454	2.75491e-08	0.000464202	MDM2	24621945	0	1		OV:IGROV1 12:93202409-94311918	FALSE	FALSE
	IKBIP	121457	IKBKB interacting protein	12	99007181	99038829	12q23.1	0.31302	0.0148844	1	HNF1A	22377719	0	1		OV:SK_OV_3 12:99032116-99485382	FALSE	FALSE
	HSPB8	26353	heat shock 22kDa protein 8	12	119616594	119632551	12q24.23	0.0771157	0.558115	1	HNF1A	1783997	0	1		ME:UACC_257 12:119416099-120533683	FALSE	FALSE
	LOC144742	144742	hypothetical LOC144742	12	119721629	119741185	12q24.23	0.0774516	0.559849	1	HNF1A	1675363	0	1		ME:UACC_257 12:119416099-120533683	FALSE	FALSE
	PRKAB1	5564	protein kinase, AMP-activated, beta 1 non-catalytic subunit	12	120105760	120119429	12q24.23	0.370034	0.00361388	1	HNF1A	1297119	0	1		ME:UACC_257 12:119416099-120533683	FALSE	FALSE
	RAB35	11021	RAB35, member RAS oncogene family	12	120532898	120554643	12q24.23	0.469533	0.000153921	1	HNF1A	861905	0	1		ME:UACC_257 12:119416099-120533683	FALSE	FALSE
	ABCB9	23457	ATP-binding cassette, sub-family B (MDR/TAP), member 9	12	123405497	123451056	12q24.31	-0.0178487	0.892329	1	HNF1A	1965183	0	1		PR:PC_3 12:123446915-124115811	FALSE	FALSE
	OGFOD2	79676	2-oxoglutarate and iron-dependent oxygenase domain containing 2	12	123459353	123464588	12q24.31	0.556448	3.9023e-06	0.0597482	HNF1A	2019039	0	1		PR:PC_3 12:123446915-124115811	FALSE	FALSE
	ARL6IP4	51329	ADP-ribosylation-like factor 6 interacting protein 4	12	123464879	123467460	12q24.31	0.565969	2.44425e-06	0.0378125	HNF1A	2024565	0	1		PR:PC_3 12:123446915-124115811	FALSE	FALSE
	MPHOSPH9	10198	M-phase phosphoprotein 9	12	123640945	123706441	12q24.31	0.481779	9.72268e-05	1	HNF1A	2200631	0	1		PR:PC_3 12:123446915-124115811	FALSE	FALSE
	SBNO1	55206	strawberry notch homolog 1 (Drosophila)	12	123773655	123834988	12q24.31	0.577355	1.3699e-06	0.0214676	HNF1A	2333341	0	1		PR:PC_3 12:123446915-124115811	FALSE	FALSE
	CDK2AP1	8099	cyclin-dependent kinase 2 associated protein 1	12	123745516	123756863	12q24.31	0.109524	0.404826	1	HNF1A	2305202	0	1		PR:PC_3 12:123446915-124115811	FALSE	FALSE
	SETD8	387893	SET domain containing (lysine methyltransferase) 8	12	123868703	123893900	12q24.31	0.425947	0.000690938	1	HNF1A	2428389	0	1		PR:PC_3 12:123446915-124115811	FALSE	FALSE
	SNRNP35	11066	small nuclear ribonucleoprotein 35kDa (U11/U12)	12	123942650	123950941	12q24.31	0.564919	2.57548e-06	0.0397809	HNF1A	2502336	0	1		PR:PC_3 12:123446915-124115811	FALSE	FALSE
	RILPL2	196383	Rab interacting lysosomal protein-like 2	12	123899935	123921264	12q24.31	0.542171	7.66457e-06	0.115191	HNF1A	2459621	0	1		PR:PC_3 12:123446915-124115811	FALSE	FALSE
	EIF2B1	1967	eukaryotic translation initiation factor 2B, subunit 1 alpha, 26kDa	12	124105569	124118323	12q24.31	0.508614	3.33605e-05	0.479057	HNF1A	2665255	0	1		PR:PC_3 12:123446915-124115811	FALSE	FALSE
	TMED2	10959	transmembrane emp24 domain trafficking protein 2	12	124069075	124082688	12q24.31	0.577621	1.35114e-06	0.0211778	HNF1A	2628761	0	1		PR:PC_3 12:123446915-124115811	FALSE	FALSE
	DDX55	57696	DEAD (Asp-Glu-Ala-Asp) box polypeptide 55	12	124086671	124105482	12q24.31	0.526563	1.54889e-05	0.227779	HNF1A	2646357	0	1		PR:PC_3 12:123446915-124115811	FALSE	FALSE
	PIWIL1	9271	piwi-like 1 (Drosophila)	12	130822432	130856877	12q24.33	0.140985	0.282612	1	HNF1A	9382118	0	1		PR:PC_3 12:130696842-131205593	FALSE	FALSE
	GPC5	2262	glypican 5	13	92050934	93519487	13q31.3	0.130225	0.32133	1	MYCBP2	14149757	0	1		LE:K_562 13:92476576-92941101	FALSE	FALSE
	NBEA	26960	neurobeachin	13	35516423	36246874	13q13.3	-0.0868302	0.509457	1	BRCA2	2542614	0	1		CO:HT29 13:34540519-36124698	FALSE	FALSE
	KLF12	11278	Kruppel-like factor 12	13	74260148	74708066	13q22.1	0.165747	0.205642	1	MYCBP2	2910725	0	1		CO:COLO205 13:74496012-74529530	FALSE	FALSE
	FZD1	8321	frizzled homolog 1 (Drosophila)	7	90893782	90898132	7q21.13	0.246927	0.0571685	1	EZH2	57606331	1	0	LC:NCI_H322M 7:90704460-92279661		FALSE	FALSE
	LATS2	26524	LATS, large tumor suppressor, homolog 2 (Drosophila)	13	21547175	21635722	13q12.11	-0.060519	0.645991	1	BRCA2	11253894	0	1		RE:ACHN 13:21557793-21617085	FALSE	FALSE
	SGCG	6445	sarcoglycan, gamma (35kDa dystrophin-associated glycoprotein)	13	23755059	23899304	13q12.12	0.134426	0.305829	1	BRCA2	8990312	0	1		LE:RPMI_8226 13:23746174-23793440	FALSE	FALSE
	RFC3	5983	replication factor C (activator 1) 3, 38kDa	13	34392205	34540695	13q13.2	0.654093	1.45061e-08	0.000246619	BRCA2	1418396	0	1		CO:HT29 13:34540519-36124698	FALSE	FALSE
	SMAD9	4093	SMAD family member 9	13	37418967	37494409	13q13.3	0.140601	0.283938	1	BRCA2	4445158	0	1		CO:HT29 13:37010853-39915706	FALSE	FALSE
	POSTN	10631	periostin, osteoblast specific factor	13	38136718	38172981	13q13.3	-0.0809649	0.538575	1	BRCA2	5162909	0	1		CO:HT29 13:37010853-39915706	FALSE	FALSE
	TRPC4	7223	transient receptor potential cation channel, subfamily C, member 4	13	38210772	38443939	13q13.3	-0.0591765	0.653337	1	BRCA2	5236963	0	1		CO:HT29 13:37010853-39915706	FALSE	FALSE
	FREM2	341640	FRAS1 related extracellular matrix protein 2	13	39261172	39461267	13q13.3	-0.0797275	0.54482	1	BRCA2	6287363	0	1		CO:HT29 13:37010853-39915706	FALSE	FALSE
	UFM1	51569	ubiquitin-fold modifier 1	13	38923941	38937143	13q13.3	0.625019	9.3968e-08	0.00155235	BRCA2	5950132	0	1		CO:HT29 13:37010853-39915706	FALSE	FALSE
	DIAPH3	81624	diaphanous homolog 3 (Drosophila)	13	60239720	60738119	13q21.2	0.295951	0.0216818	1	RB1	11183694	0	1		LE:SR 13:59663689-63650322	FALSE	FALSE
	TDRD3	81550	tudor domain containing 3	13	60970590	61148013	13q21.2	0.360046	0.00471816	1	RB1	11914564	0	1		LE:SR 13:59663689-63650322	FALSE	FALSE
	POLR1D	51082	polymerase (RNA) I polypeptide D, 16kDa	13	28194879	28241559	13q12.2	0.656852	1.20228e-08	0.000204952	BRCA2	4648057	0	1		LC:NCI_H23 13:28237276-28585573	FALSE	FALSE
	GSX1	219409	GS homeobox 1	13	28366779	28368089	13q12.2	-0.119347	0.367945	1	BRCA2	4521527	0	1		LC:NCI_H23 13:28237276-28585573	FALSE	FALSE
	CDX2	1045	caudal type homeobox 2	13	28536204	28543505	13q12.2	0.248901	0.0551461	1	BRCA2	4346111	0	1		LC:NCI_H23 13:28237276-28585573	FALSE	FALSE
	PDX1	3651	pancreatic and duodenal homeobox 1	13	28494167	28500451	13q12.2	0.593414	7.29981e-07	0.0115972	BRCA2	4389165	0	1		LC:NCI_H23 13:28237276-28585573	FALSE	FALSE
	PRHOXNB	646625	parahox cluster neighbor	13	28552242	28562774	13q12.2	0.209103	0.108844	1	BRCA2	4326842	0	1		LC:NCI_H23 13:28237276-28585573	FALSE	FALSE
	ATP5EP2	432369	ATP synthase, H+ transporting, mitochondrial F1 complex, epsilon subunit pseudogene 2	13	28519342	28519710	13q12.2	-0.0558513	0.671673	1	BRCA2	4369906	0	1		LC:NCI_H23 13:28237276-28585573	FALSE	FALSE
	RET	5979	ret proto-oncogene	10	43572516	43625797	10q11.21	0.0420002	0.750008	1	GATA3	35455352	1	0	OV:NCI_ADR_RES 10:42847540-44300592		FALSE	FALSE
	MAB21L1	4081	mab-21-like 1 (C. elegans)	13	36047925	36050832	13q13.3	0.0556166	0.672975	1	BRCA2	3074116	0	1		CO:HT29 13:34540519-36124698	FALSE	FALSE
	CCNA1	8900	cyclin A1	13	37005966	37017019	13q13.3	-0.00603548	0.963496	1	BRCA2	4032157	0	1		CO:HT29 13:37010853-39915706	FALSE	FALSE
	RFXAP	5994	regulatory factor X-associated protein	13	37393338	37403740	13q13.3	0.528838	1.40098e-05	0.206547	BRCA2	4419529	0	1		CO:HT29 13:37010853-39915706	FALSE	FALSE
	ALG5	29880	asparagine-linked glycosylation 5, dolichyl-phosphate beta-glucosyltransferase homolog (S. cerevisiae)	13	37523907	37573504	13q13.3	0.774804	3.7504e-13	6.85086e-09	BRCA2	4550098	0	1		CO:HT29 13:37010853-39915706	FALSE	FALSE
	EXOSC8	11340	exosome component 8	13	37574677	37583751	13q13.3	0.667268	5.81234e-09	9.99489e-05	BRCA2	4600868	0	1		CO:HT29 13:37010853-39915706	FALSE	FALSE
	CSNK1A1L	122011	casein kinase 1, alpha 1-like	13	37677396	37679801	13q13.3	-0.0950341	0.474007	1	BRCA2	4703587	0	1		CO:HT29 13:37010853-39915706	FALSE	FALSE
	STOML3	161003	stomatin (EPB72)-like 3	13	39540061	39564996	13q13.3	-0.254095	0.0521392	1	BRCA2	6566252	0	1		CO:HT29 13:37010853-39915706	FALSE	FALSE
	NHLRC3	387921	NHL repeat containing 3	13	39612447	39624244	13q13.3	0.521466	1.93453e-05	0.282461	BRCA2	6638638	0	1		CO:HT29 13:37010853-39915706	FALSE	FALSE
	CCDC70	83446	coiled-coil domain containing 70	13	52436116	52440372	13q14.3	-0.102702	0.438908	1	RB1	3380090	0	1		ME:MDA_N 13:52384708-52442436	FALSE	FALSE
	PCDH20	64881	protocadherin 20	13	61983818	61989655	13q21.2	0.167211	0.201611	1	RB1	12927792	0	1		LE:SR 13:59663689-63650322	FALSE	FALSE
	SLITRK1	114798	SLIT and NTRK-like family, member 1	13	84451342	84456528	13q31.1	-0.0219641	0.86885	1	MYCBP2	6550165	0	1		CO:COLO205 13:83166680-84564462	FALSE	FALSE
	GPHN	10243	gephyrin	14	66974124	67648525	14q23.3	0.685167	1.55488e-09	2.70969e-05			0	1		RE:TK_10 14:67233898-67300763	FALSE	FALSE
	NPAS3	64067	neuronal PAS domain protein 3	14	33408458	34273382	14q13.1	-0.00612428	0.962959	1			0	1		OV:OVCAR_3 14:33525952-33803608	FALSE	FALSE
	MIPOL1	145282	mirror-image polydactyly 1	14	37667117	38020464	14q13.3:14q21.1	0.652143	1.65468e-08	0.000280865			0	1		BR:HS578T 14:37731861-37792001	FALSE	FALSE
	NRXN3	9369	neurexin 3	14	78636715	80334633	14q24.3:14q31.1	0.0251477	0.850046	1			0	1		RE:RXF_393 14:79592485-79868014	FALSE	FALSE
	NUBPL	80224	nucleotide binding protein-like	14	32030590	32330429	14q12	0.724937	5.77675e-11	1.03259e-06			0	1		CO:SW_620 14:32272037-32442124	FALSE	FALSE
	RALGAPA1	253959	Ral GTPase activating protein, alpha subunit 1 (catalytic)	14	36007557	36278432	14q13.2	0.769345	6.91577e-13	1.26061e-08			0	1		CO:HCT_15 14:36132460-36378846	FALSE	FALSE
	BRMS1L	84312	breast cancer metastasis-suppressor 1-like	14	36295596	36341169	14q13.2	0.709612	2.19215e-10	3.88098e-06			0	1		CO:HCT_15 14:36132460-36378846	FALSE	FALSE
	MDGA2	161357	MAM domain containing glycosylphosphatidylinositol anchor 2	14	47308827	48144157	14q21.3	0.131487	0.316621	1			0	1		PR:RC01 14:46560942-47600492	FALSE	FALSE
	MAP4K5	11183	mitogen-activated protein kinase kinase kinase kinase 5	14	50885210	50999376	14q21.3:14q22.1	0.576858	1.4056e-06	0.0220145			0	1		RE:786_0 14:50978170-51115016	FALSE	FALSE
	NIN	51199	ninein (GSK3B interacting protein)	14	51186480	51297839	14q22.1	0.534381	1.09366e-05	0.162463			0	1		RE:ACHN 14:51110769-51235038	FALSE	FALSE
	ATG14	22863	ATG14 autophagy related 14 homolog (S. cerevisiae)	14	55833108	55878576	14q22.3	0.6874	1.31043e-09	2.28696e-05			0	1		OV:OVCAR_5 14:55793298-56101172	FALSE	FALSE
	KTN1	3895	kinectin 1 (kinesin receptor)	14	56046924	56151302	14q22.3	0.481237	9.9261e-05	1			0	1		OV:OVCAR_5 14:55793298-56101172	FALSE	FALSE
	CDC42BPB	9578	CDC42 binding protein kinase beta (DMPK-like)	14	103398715	103523742	14q32.32	0.41916	0.000857777	1			0	1		LE:RPMI_8226 14:103384200-103446050	FALSE	FALSE
	RPL10L	140801	ribosomal protein L10-like	14	47120219	47121028	14q21.2	-0.169046	0.196635	1			0	1		PR:RC01 14:46560942-47600492	FALSE	FALSE
	ATL1	51062	atlastin GTPase 1	14	50999799	51099784	14q22.1	0.116085	0.377091	1			0	1		RE:786_0 14:50978170-51115016	FALSE	FALSE
	FBXO34	55030	F-box protein 34	14	55738020	55820329	14q22.3	0.752516	4.1261e-12	7.47525e-08			0	1		OV:OVCAR_5 14:55793298-56101172	FALSE	FALSE
	TBPL2	387332	TATA box binding protein like 2	14	55880929	55907263	14q22.3	0.382159	0.00258515	1			0	1		OV:OVCAR_5 14:55793298-56101172	FALSE	FALSE
	AMN	81693	amnionless homolog (mouse)	14	103388992	103397179	14q32.32	0.150675	0.250495	1			0	1		LE:RPMI_8226 14:103384200-103446050	FALSE	FALSE
	NIPA1	123606	non imprinted in Prader-Willi/Angelman syndrome 1	15	23043278	23086843	15q11.2	0.610916	2.17434e-07	0.00354201	MGA	18865766	0	1		LE:RPMI_8226 15:22651956-25300842	FALSE	FALSE
	STARD9	57519	StAR-related lipid transfer (START) domain containing 9	15	42867856	43013196	15q15.2	0.0620104	0.637869	1	MGA	805715	0	1		OV:SK_OV_3 15:41270696-43011344	FALSE	FALSE
	UNC13C	440279	unc-13 homolog C (C. elegans)	15	54305100	54920806	15q21.3	0.223764	0.085674	1	B2M	9294743	0	1		LC:A549 15:54042593-55299454	FALSE	FALSE
	CYFIP1	23191	cytoplasmic FMR1 interacting protein 1	15	22892683	23003603	15q11.2	0.386924	0.0022584	1	MGA	18949006	0	1		LE:RPMI_8226 15:22651956-25300842	FALSE	FALSE
	HERC2P2	400322	hect domain and RLD 2 pseudogene 2	15	23282264	23378259	15q11.2	0.310519	0.0157484	1	MGA	18574350	0	1		LE:RPMI_8226 15:22651956-25300842	FALSE	FALSE
	ATP10A	57194	ATPase, class V, type 10A	15	25923859	26108349	15q12	0.315328	0.0141236	1	MGA	15844260	0	1		LC:A549 15:24980354-26685982	FALSE	FALSE
	GABRB3	2562	gamma-aminobutyric acid (GABA) A receptor, beta 3	15	26788693	27018935	15q12	0.387169	0.00224263	1	MGA	14933674	0	1		LC:HOP_62 15:26125851-26809338	FALSE	FALSE
	ATPBD4	89978	ATP binding domain 4	15	35663169	35838404	15q14	0.655578	1.31148e-08	0.000223266	MGA	6114205	0	1		LE:RPMI_8226 15:35417039-37285782	FALSE	FALSE
	C15orf41	84529	chromosome 15 open reading frame 41	15	36871811	37102449	15q14	0.519868	2.0726e-05	0.30206	MGA	4850160	0	1		LE:RPMI_8226 15:35417039-37285782	FALSE	FALSE
	CSNK1A1P1	161635	casein kinase 1, alpha 1 pseudogene 1	15	37091300	37110707	15q14	-0.0209396	0.874917	1	MGA	4841902	0	1		LE:RPMI_8226 15:35417039-37285782	FALSE	FALSE
	MEIS2	4212	Meis homeobox 2	15	37183221	37393500	15q14	0.403274	0.00139884	1	MGA	4559109	1	1	LC:NCI_H226 15:37143499-38103880	LE:RPMI_8226 15:35417039-37285782	FALSE	FALSE
	RPAP1	26015	RNA polymerase II associated protein 1	15	41809374	41836464	15q15.1	0.595225	5.27659e-07	0.00844413	MGA	116145	0	1		OV:SK_OV_3 15:41270696-43011344	FALSE	FALSE
	INO80	54617	INO80 homolog (S. cerevisiae)	15	41271078	41408340	15q15.1	0.748652	6.09448e-12	1.10206e-07	MGA	544269	0	1		OV:SK_OV_3 15:41270696-43011344	FALSE	FALSE
	NDUFAF1	51103	NADH dehydrogenase (ubiquinone) 1 alpha subcomplex, assembly factor 1	15	41679546	41694658	15q15.1	0.639054	3.9075e-08	0.000655015	MGA	257951	0	1		OV:SK_OV_3 15:41270696-43011344	FALSE	FALSE
[truncated: 16,510 more rows]
